# Supplementary material for: Heart failure-induced cognitive dysfunction is mediated by intracellular Ca2+ leak through ryanodine receptor type 2
Source: PubMed Central journal article supplement (PMC10400432; doi:10.1038/s41593-023-01377-6), 2023-07-10

Figure 7C

|     | SNAP25/GAPD<br>H | VAMP8/GAPD<br>H | SYT2/GAPD<br>H | SYT13/GAPD<br>H | CPLX3/GAPD<br>H |
|-----|------------------|-----------------|----------------|-----------------|-----------------|
| C1  | 0.8              | 2.3             | 1              | 3               |                 |
| C2  | 1.2              | 2               | 1.1            | 3.3             | 2.2             |
| C3  | 1                | 2.7             | 0.9            | 3.4             | 2.3             |
| C4  | 1.1              | 2.3             | 1.2            | 3.6             | 2.4             |
| HF1 | 2.5              | 0.8             | 3.3            | 0.8             | 2.6             |
| HF2 | 2.8              | 0.6             | 3.6            | 0.6             | 0.8             |
| HF3 | 2.4              | 0.7             | 3              | 1               | 0.9             |
| HF4 | 2.9              | 0.4             | 3.1            | 0.4             | 1               |
| HF5 | 2.6              | 0.4             | 2.6            | 0.5             | 0.8             |
| HF6 | 2.7              | 0.2             | 3.1            | 0.1             | 1               |
| HF7 | 2.8              | 0.4             | 2              | 0.4             | 1.1             |
| HF8 | 3                | 0.5             | 1.6            | 0.1             | 1.2             |
| HF9 | 2.8              | 0.6             | 1.1            | 0.7             | 1               |

**Figure 7E**

|           | <b>Snap25</b> | <b>VAMP8</b> | <b>SYT2</b> | <b>SYT13</b> | <b>CPLX3</b> |
|-----------|---------------|--------------|-------------|--------------|--------------|
| SHAM      | 1             | 3.7          | 0.8         | 3.5          | 3.3          |
| SHAM      | 1.1           | 3.9          | 0.9         | 3.8          | 3.5          |
| SHAM      | 1             | 3.5          | 0.5         | 3.5          | 3.5          |
| SHAM      | 1.2           | 4            | 0.8         | 2.8          | 3.7          |
| SHAM      | 0.8           | 3.2          | 1.3         | 2.4          | 4.2          |
| SHAM      | 0.7           | 4.4          | 0.9         | 4            | 4            |
| MI        | 4             | 0.2          | 4           | 1            | 0.6          |
| MI        | 3.9           | 0.3          | 4.2         | 0.8          | 0.8          |
| MI        | 3.5           | 0.9          | 2.5         | 0.3          | 1            |
| MI        | 4             | 1.2          | 3.9         | 0.5          | 0.5          |
| MI        | 3.7           | 0.7          | 3           | 1            | 1            |
| MI        | 4.6           | 0.5          | 2.8         | 0.75         | 1.2          |
| MI+ARM036 | 3.8           | 0.5          | 4.4         | 0.7          | 0.9          |
| MI+ARM036 | 3.7           | 0.4          | 4.4         | 0.6          | 0.7          |
| MI+ARM036 | 3.2           | 1.5          | 2           | 1            | 0.95         |
| MI+ARM036 | 4             | 2.2          | 2.6         | 1.2          | 1.2          |
| MI+ARM036 | 3.9           | 1.7          | 3           | 0.85         | 0.85         |
| MI+ARM036 | 4.2           | 2            | 3.5         | 0.65         | 1.15         |
| MI+S107   | 1.2           | 3.8          | 1           | 3.7          | 3.6          |
| MI+S107   | 1             | 3.6          | 0.8         | 3.8          | 3.5          |
| MI+S107   | 1.5           | 3.2          | 0.5         | 3.9          | 3.9          |
| MI+S107   | 2.3           | 3.9          | 0.2         | 3.2          | 3.2          |
| MI+S107   | 1.9           | 3.6          | 1           | 2.9          | 4            |
| MI+S107   | 2             | 4.5          | 1.15        | 2.75         | 3.7          |
| MI+prop   | 1.5           | 2.6          | 0.9         | 3.5          | 3.5          |
| MI+prop   | 1.7           | 2.2          | 1           | 3.6          | 3.6          |
| MI+prop   | 1.9           | 2.3          | 0.8         | 3.2          | 3.3          |
| MI+prop   | 1.4           | 2.8          | 1.1         | 2.5          | 3.8          |
| MI+SD-208 | 1.7           | 3.3          | 0.8         | 3.7          | 3.6          |
| MI+SD-208 | 1.5           | 3.5          | 0.7         | 3.5          | 3.8          |
| MI+SD-208 | 1.4           | 3.1          | 0.6         | 3.3          | 3.8          |
| MI+SD-208 | 1.7           | 3.6          | 0.9         | 3.7          | 3.6          |

Figure 7B-D

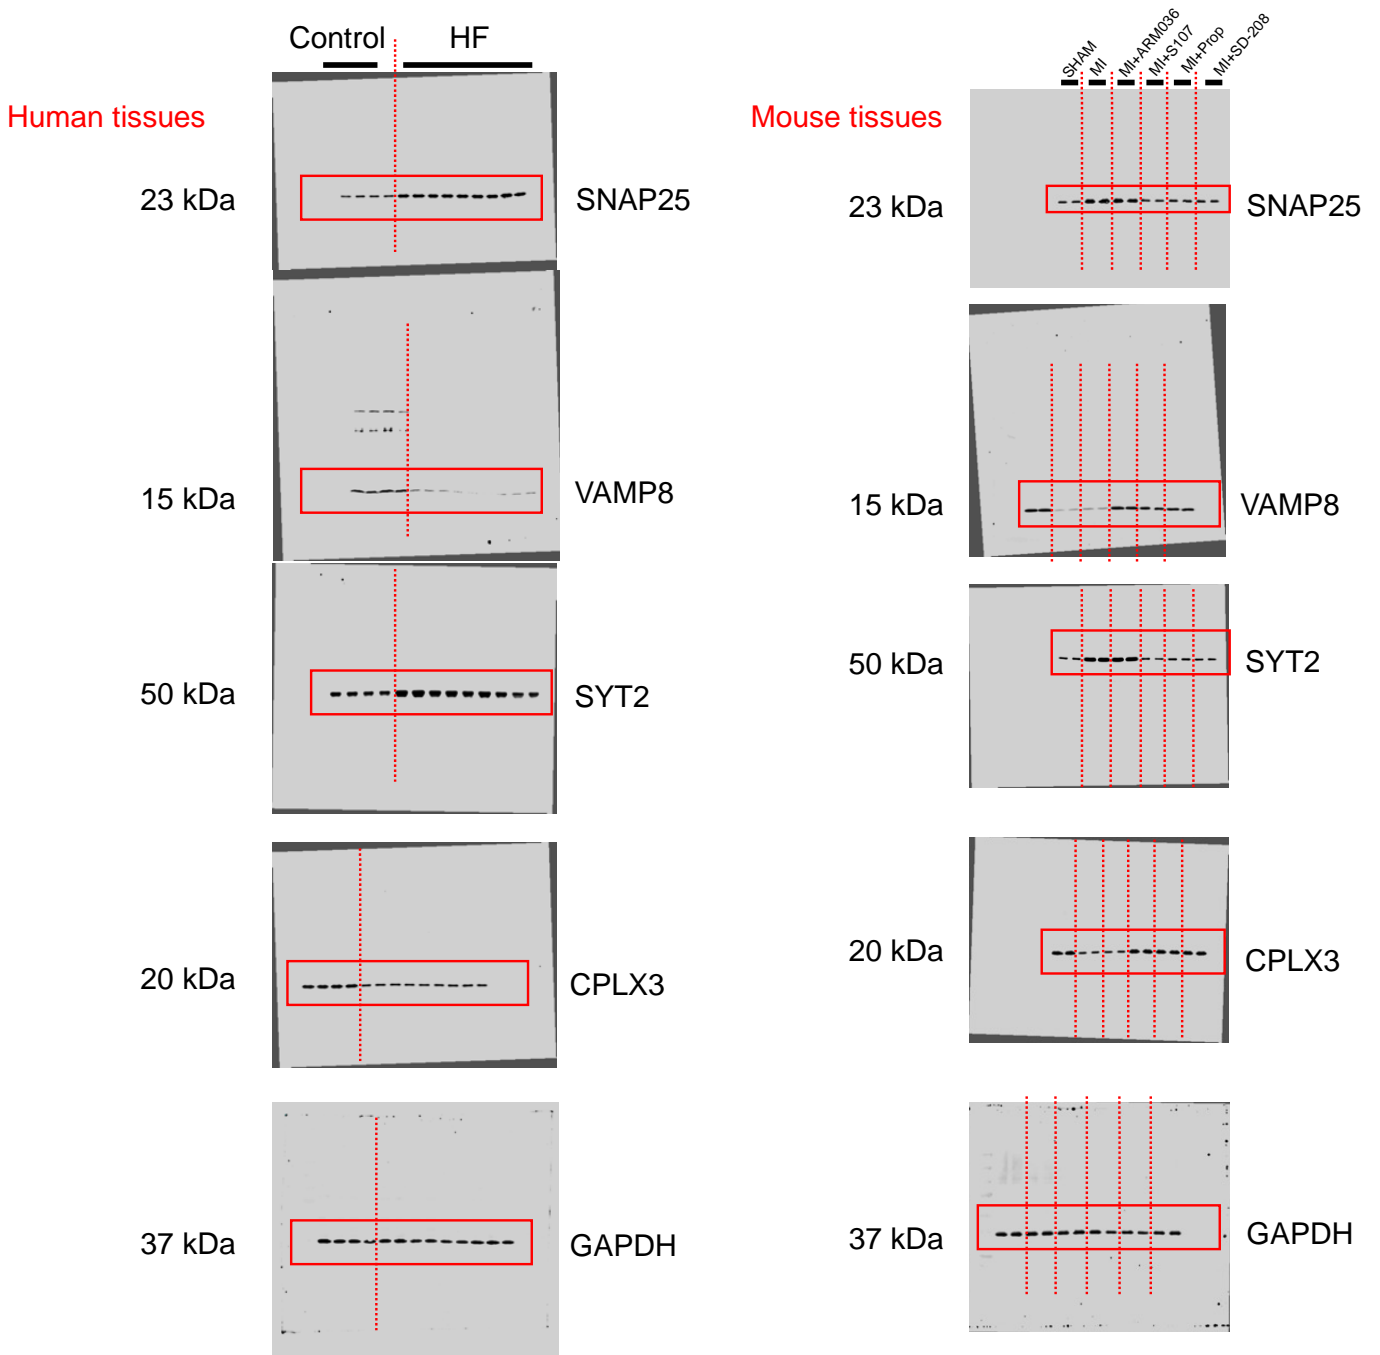

Mouse tissues

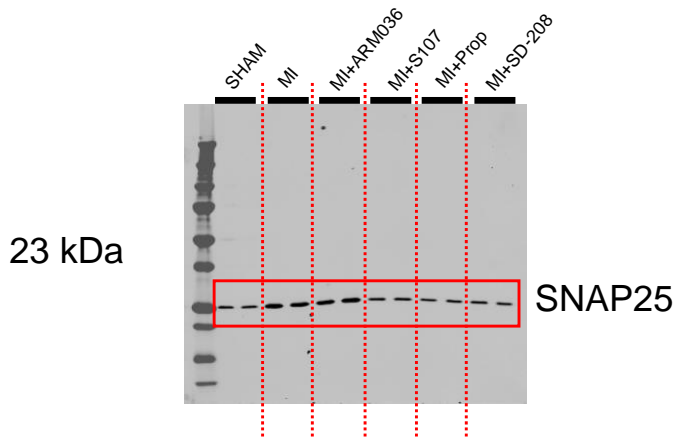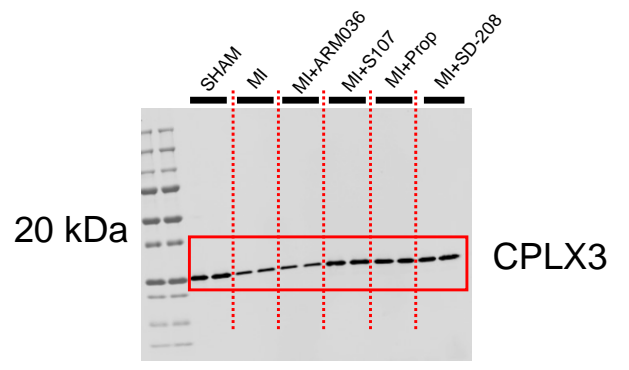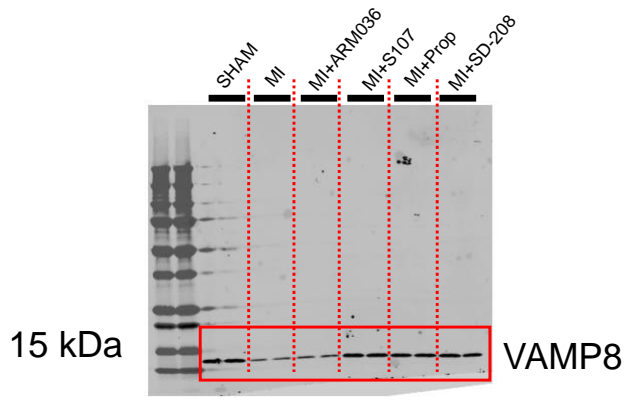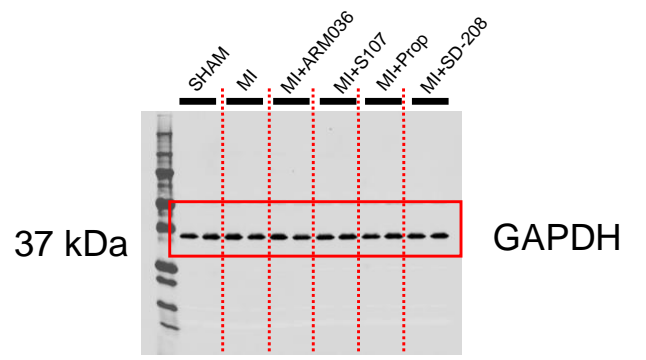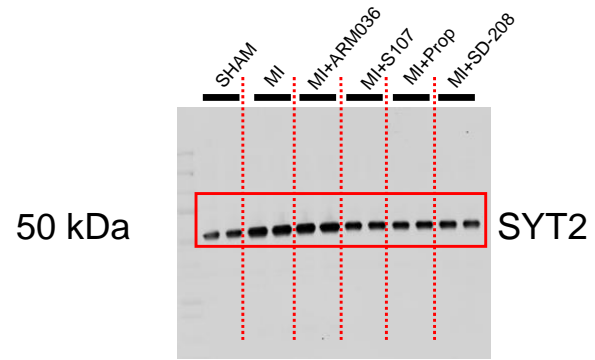

Mice tissues

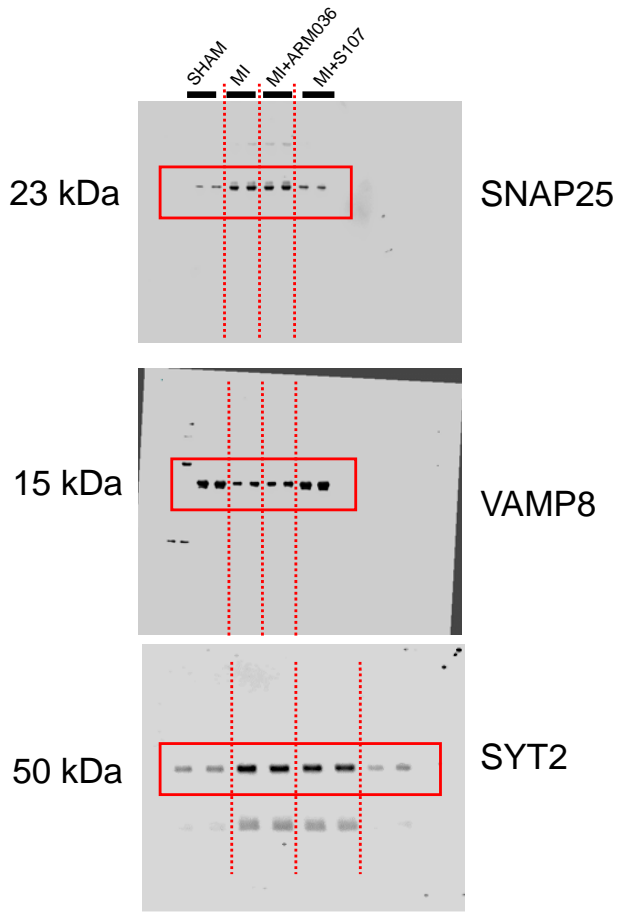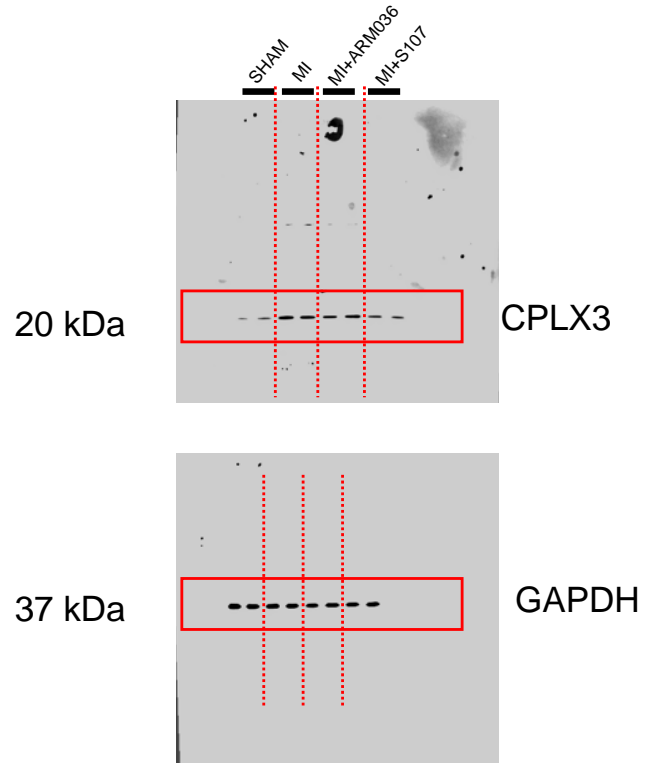

Supplement: 41593_2023_1377_MOESM10_ESM.pdf [file 41593_2023_1377_MOESM10_ESM.pdf]
