# Supplementary material for: Heart failure-induced cognitive dysfunction is mediated by intracellular Ca2+ leak through ryanodine receptor type 2
Source: PubMed Central journal article supplement (PMC10400432; doi:10.1038/s41593-023-01377-6), 2023-07-10
Supplement: 41593_2023_1377_MOESM1_ESM.pdf [file 41593_2023_1377_MOESM1_ESM.pdf]

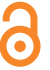

# Heart failure-induced cognitive dysfunction is mediated by intracellular $\text{Ca}^{2+}$ leak through ryanodine receptor type 2

In the format provided by the authors and unedited

## extended methods and supplementary information

1  
2  
3  
4  
5  
6  
7  
8  
9  
10  
11  
12  
13  
14  
15  
16  
17  
18  
19  
20  
21  
22  
23

### Extended methods.

#### Global quantitative proteomics analysis

For global quantitative proteomics of fresh frozen hippocampal samples from MI and SHAM mice, diaPASEF<sup>1</sup> (Data independent acquisition) based proteomics was used. In brief, frozen mouse hippocampal tissues were lysed by bead-beating in lysis buffer<sup>2</sup> (2% SDS, 1% SDC, 100 mM Tris-HCl pH 8.5, and protease inhibitors) and boiled for 10 min at 95°C, 1500 rpm. Protein reduction and alkylation of cysteines was performed with 10mM TCEP and 40mM CAA at 45°C for 10 min, followed by sonication in a water bath and then cooled down to room temperature. Cleared lysate was precipitated with the acetone-salt method, as previously described<sup>3</sup>, and precipitated pellets were resuspended in SDC buffer ( 1% SDC, and 100 mM TrisHCl pH 8.5). Protein digestion was processed overnight by adding LysC and trypsin in a 1:50 ratio ( $\mu\text{g}$  of enzyme to  $\mu\text{g}$  of protein) at 37° C and 1400 rpm. Peptides were acidified by adding 1% TFA, vortexed, and subjected to StageTip clean-up via SDB-RPS. Peptides were loaded on one 14-gauge StageTip plugs. Peptides were washed two times with 200  $\mu\text{l}$  1% TFA 99% ethyl acetate followed 200  $\mu\text{l}$  0.2% TFA/5%ACN in centrifuge at 3000 rpm, followed by elution with 60  $\mu\text{l}$  of 1% Ammonia, 50% ACN into Eppendorf tubes and dried at 45°C in a SpeedVac centrifuge. Samples were resuspended in 10  $\mu\text{l}$  of LC buffer (3% ACN/0.1% FA). Peptide concentrations were determined using NanoDrop and 200 ng of each sample were used for PASEF and diaPASEF analysis on timsTOFPro.

For spectral library generation, 10  $\mu\text{g}$  of each digested tissue sample was pooled and dried in speedVac. Pooled dried peptides were resuspended in 100  $\mu\text{l}$  of 1% TFA, pH 2 and subjected to fractionation with mixed mode SDB-SCX StageTip<sup>3</sup>. Peptides were fractionated into 9 fractions; each fractionated peptide was in dissolved in 10  $\mu\text{l}$  of (3% acetonitrile/ 0.1% formic acid) and injected using PASEF method.

Peptides were separated within 120 min at a flow rate of 400 nl/min on a reversed-phase C18 column with an integrated CaptiveSpray Emitter (25 cm x 75 $\mu\text{m}$ , 1.6  $\mu\text{m}$ , IonOpticks). Mobile phases A and B were with 0.1% formic acid in water and 0.1% formic acid in ACN.

24 The fraction of B was linearly increased from 2 to 23% within 90 min, followed by an increase to 35% within 10 min, and a further  
25 increase to 80% before re-equilibration. The timsTOF Pro was operated in PASEF mode<sup>1</sup> with the following settings: Mass Range 100  
26 to 1700m/z, 1/K0 Start 0.6 V·s/cm<sup>2</sup>, End 1.6 V·s/cm<sup>2</sup>, Ramp time 100ms, Lock Duty Cycle to 100%, Capillary Voltage 1600V, Dry Gas  
27 3 l/min, Dry Temp 200°C, PASEF settings: 10 MSMS Frames (1.16 seconds duty cycle), charge range 0-5, active exclusion for 0.4  
28 min, Target intensity 20000, Intensity threshold 2500, CID collision energy 59eV. A polygon filter was applied to the *m/z* and ion  
29 mobility plane to select features most likely representing peptide precursors rather than singly charged background ions. diaPASEF<sup>1</sup>  
30 experiment was acquired at defined 32 × 25 Th isolation windows from *m/z* 400 to 1,200. To adapt the MS1 cycle time in diaPASEF,  
31 we set the repetitions to 2 in the 16-scan diaPASEF scheme and to 4 in the 4-scan diaPASEF scheme in these experiments. The  
32 collision energy was ramped linearly as a function of the mobility from 59 eV at 1/K0=1.6 Vs cm<sup>-2</sup> to 20 eV at 1/K0=0.6 Vs cm<sup>-2</sup>.

33 To generate the sample specific spectral libraries, the acquired PASEF raw files and diaPASEF raw files were searched with UniProt  
34 mouse database in Pulsar search engine using the Hybrid spectral library generation functionality of Spectromine with default settings<sup>4</sup>.  
35 The raw intensities for the proteins were calculated by summation of the peptide intensities. diaPASEF data were analyzed with  
36 Spectronaut Pulsar X<sup>4</sup>, a mass spectrometer vendor software independent from Biognosys. The default settings were used for targeted  
37 analysis of diaPASEF data in Spectronaut, except the decoy generation was set to mutated. The false discovery rate (FDR) will be  
38 estimated with the mProphet approach and set to 1% at peptide precursor level and at 1% at protein level. Results obtained from  
39 Spectronaut were further analyzed using the Spectronaut statistical package.

40 Significantly changed protein abundance was determined by unpaired t-test with a threshold for significance of  $p < 0.05$  (permutation-  
41 based FDR correction), fold-change  $\geq 1.5$ , unique peptides  $\geq 2$ . The significantly changed proteins between MI and SHAM hippocampus  
42 were processed for Volcano plot using R ggplot2 package<sup>5</sup> and hierarchical clustering using TBtools software<sup>6</sup>. Gene ontology (GO)  
43 and Kyoto Encyclopedia of Genes and Genomes (KEGG) for the DEGs were processed by R clusterProfiler package<sup>7</sup>. The potential  
44 biological processes (BP), cellular components (CC), molecular functions (MF), and pathways among the DEGs were shown in  
45 functional enrichment analysis results. The cut-off value for significant GO and KEGG results was adjusted  $p$  value  $< 0.05$ .

46 Gene set enrichment analysis (GSEA) was performed to identify the statistically significant gene sets in the comparison between MI  
47 and SHAM. The gene list was pre-ranked based on fold change before enrichment analysis. GO enrichment analysis was performed  
48 through gseGO function in clusterProfiler package. The adjusted p-value<0.05 was set as the cut-off criteria. KEGG enrichment  
49 analysis was conducted by the GSEA software obtained from the Broad Institute (<http://www.broad.mit.edu/GSEA>)<sup>8</sup>. The significantly  
50 enriched pathways were defined by nominal |NES|>1, NOM p-value <0.05, and FDR q-value <0.25.

51

## 52 **RNA Sequencing**

53 Eukaryotic total RNA was extracted from 4 MI and 4 SHAM hippocampus samples. Quality control of RNA was performed by RNA  
54 Integrity Number (RIN) assessments<sup>9</sup>. Poly-A pull-down was used to enrich mRNAs from total RNA samples, then proceeded with  
55 library construction using Illumina TruSeq chemistry. Libraries were then sequenced using Illumina NovaSeq 6000 at Columbia  
56 Genome Center. Samples were multiplexed in each lane, which yielded targeted number of paired-end 100bp reads for each sample.  
57 RTA (Illumina) for base calling and bcl2fastq2 (version 2.19) for converting BCL to fastq format was used, coupled with adaptor  
58 trimming. We performed a pseudoalignment to a kallisto index created from transcriptomes (Mouse: GRCm38) using kallisto (0.44.0)<sup>10</sup>.  
59 Differentially expressed genes (DEGs) under various conditions using DESeq2 and designed R packages were used to test differential  
60 expression between two experimental groups from RNA-seq counts data. The cut-off values for DEGs included adjusted-p-value <0.05  
61 and fold-change≥1.3. The following clustering and functional enrichment analysis (GO and KEGG pathway) DEGs between MI and  
62 SHAM hippocampus were performed as proteomics analysis. The cut-off value for significant GO and KEGG results was adjusted p-  
63 value <0.05.

64

65

66

67

68 **List of used drugs**

| <b>Drug</b>          | <b>Source</b>                | <b>Concentration</b>                     |
|----------------------|------------------------------|------------------------------------------|
| <b>Rycal S107</b>    | Marks lab                    | 75mg/kg/day in mice/ 10 $\mu$ M in cells |
| <b>Rycal ARM036</b>  | Marks lab                    | 20mg/kg/day in mice                      |
| <b>Propranolol</b>   | Sigma Aldrich cat# 318-98-9  | 10mg/kg/day in mice/ 1 $\mu$ M in cells  |
| <b>SD-208</b>        | BLDpharm                     | 10mg/kg/day in mice/1 $\mu$ M in cells   |
| <b>Isoproterenol</b> | Sigma Aldrich cat# 5984-95-2 | 1 $\mu$ M in cells                       |

69

70

71

72

73

74

75

76

77

78

79 **List of used antibodies**

| <b>Protein</b>    | <b>Antibodies sources</b>                                                                                          | <b>Dilution</b> | <b>Secondary (dilution: 1/5000)</b> |
|-------------------|--------------------------------------------------------------------------------------------------------------------|-----------------|-------------------------------------|
| <b>RyR2</b>       | Custom made: Acta Neuropathologica volume 134, pages749–767 (2017)                                                 | 1/2500          | IRDye® 800CW Goat anti-Rabbit IgG   |
| <b>pSer2808</b>   | Custom made. Circ Res. 2004;94(6): e61–e70.                                                                        | 1/1000          | IRDye® 800CW Goat anti-Rabbit IgG   |
| <b>DNP</b>        | Millipore Oxyblot (S7150).<br>Lot. 3249659<br>Validated by Western blot of derivatized samples                     | 1/1000          | IRDye® 800CW Goat anti-Rabbit IgG   |
| <b>Cys-NO</b>     | ABM Y061263<br>Lot. AP10387<br>Validated by Western blot of at 1:0,000 using nitrosylated Cysteine–BSA as control. | 1/1000          | IRDye® 800CW Goat anti-Rabbit IgG   |
| <b>Calstabin2</b> | Custom. JBC. 267 (14):9474-9477 (1992).                                                                            | 1/2500          | IRDye® 800CW Goat anti-Rabbit IgG   |
| <b>Snap25</b>     | Thermofisher, MA5 17609<br>Lot. WD 3256763<br>Validated by western blot of PC-12 cell lines                        | 1/1000          | IRDye® 800CW Goat anti-Mouse IgG    |
| <b>Vamp8</b>      | Abnova, H00008673-B01P<br>WD3257113<br>Validate by Western blot of VAMP transfected Cell Lines                     | 1/1000          | IRDye® 800CW Goat anti-Rabbit IgG   |
| <b>Syt2</b>       | Abcam. Ab181123<br>Lot. GR164541<br>Validated by Western blot of rat and mouse brain tissue lysate                 | 1/1000          | IRDye® 800CW Goat anti-Rabbit IgG   |

|                                        |                                                                                                                                                                                                            |        |                                   |
|----------------------------------------|------------------------------------------------------------------------------------------------------------------------------------------------------------------------------------------------------------|--------|-----------------------------------|
| <b>Cplx3</b>                           | Thermofisher, PA5-24148<br>Lot. WD3256486<br>Validated by Western blot analysis in mouse liver tissue lysate                                                                                               | 1/1000 | IRDye® 800CW Goat anti-Rabbit IgG |
| <b>GAPDH</b>                           | Thermofisher, PA1987<br>Lot. XJ358966<br>Validated by Western Blot in tissue extract of Ms Brain                                                                                                           | 1/5000 | IRDye® 800CW Goat anti-mouse IgG  |
| <b>p-AMPK</b>                          | Thermofisher, PA5-104982<br>Lot. VJ3103601<br>Validated by Western Blot of H202 treated EC304 Cells.                                                                                                       | 1/1000 | IRDye® 800CW Goat anti-Rabbit IgG |
| <b>AMPK</b>                            | Abcam, ab207442<br>Lot. GR300197<br>Validated by Western Blot of Human skeletal muscle lysate                                                                                                              | 1/1000 | IRDye® 800CW Goat anti-Rabbit IgG |
| <b>p-GSK3<math>\beta</math> (T216)</b> | Abcam, ab75745<br>Lot. 1010539<br>Validated by Western blot of 293 cell extracts treated with insulin or with a PKC activator. (phorbol 12-myristate 13-acetate. PMA).                                     | 1/1000 | IRDye® 800CW Goat anti-Rabbit IgG |
| <b>GSK3<math>\beta</math></b>          | Abcam, ab32391<br>Lot. 1024397<br>Validated by Western blot of A431 cell lysate as well as wild type HAP1 whole cell lysate and GSK3 $\beta$ knockout HAP1 whole cell lysate.                              | 1/1000 | IRDye® 800CW Goat anti-Rabbit IgG |
| <b>p-Tau (S199)</b>                    | Thermofisher, 44-734G<br>Lot. 2285802<br>Validated by Western blot of untreated human recombinant Tau or treated with GSK-3 $\beta$ . The antibody has been used in several manuscripts for Western blots. | 1/1000 | IRDye® 800CW Goat anti-Rabbit IgG |
| <b>p-Tau (S202/T205)</b>               | Abcam, ab210703<br>Lot. GR3256698<br>Validated by Western blot of human brain tissue lysate.                                                                                                               | 1/1000 | IRDye® 800CW Goat anti-Rabbit IgG |

|                     |                                                                                                                                                                              |        |                                   |
|---------------------|------------------------------------------------------------------------------------------------------------------------------------------------------------------------------|--------|-----------------------------------|
| <b>p-Tau (S262)</b> | Thermofisher, 44-750G<br>Lot. 2548898<br>Validated by Western blot of mouse brain, rat brain, and mouse kidney lysate                                                        | 1/1000 | IRDye® 800CW Goat anti-Rabbit IgG |
| <b>Tau</b>          | Thermofisher, PA5-27287<br>Lot. WA3171630<br>Validated by Western blot of mouse and rat brain lysates                                                                        | 1/1000 | IRDye® 800CW Goat anti-Rabbit IgG |
| <b>CDK5</b>         | Thermofisher, AHZ0492<br>Lot. VJ3096132<br>Validated by Western blot of cell lines including CF7, Jurkat, PC-3, MDA-MB-231, A549, HeLa and HT-29. And with HEK (+/- CD5 ko). | 1/1000 | IRDye® 800CW Goat anti-mouse IgG  |
| <b>P25</b>          | Thermofisher, PA5-57726<br>Lot. XF3609058A<br>Validated by immunofluorescent staining of human cell line A549                                                                | 1/1000 | IRDye® 800CW Goat anti-Rabbit IgG |
| <b>APP</b>          | Thermofisher, 14-9749-82<br>Lot. 2458748<br>Validated by Western Blot of mice and rat brain lysate                                                                           | 1/1000 | IRDye® 800CW Goat anti-Rabbit IgG |
| <b>BACE1</b>        | Abcam, ab183612<br>Lot. GR3240345<br>Validated by Western Blotting of Mouse hippocampus lysate                                                                               | 1/1000 | IRDye® 800CW Goat anti-Rabbit IgG |
| <b>B-CTF</b>        | Millipore, MABN381<br>Validated by Western Blotting in DAPT treated HEK293 cell lysate.                                                                                      | 1/1000 | IRDye® 800CW Goat anti-mouse IgG  |
| <b>TGF-b1</b>       | Abcam, ab215715<br>Lot. GR3412442<br>Validated by Western Blot of Wild-type A549, K562 and SH-SY5Y whole cell lysates                                                        | 1/1000 | IRDye® 800CW Goat anti-Rabbit IgG |



|                |                                                                                                                       |        |                                   |
|----------------|-----------------------------------------------------------------------------------------------------------------------|--------|-----------------------------------|
| <b>p-Smad3</b> | Abcam, ab52903<br>Lot. GR328135<br>Validated by Western Blot of HL-60 treated with TGF- $\beta$ cell lysates          | 1/1000 | IRDye® 800CW Goat anti-Rabbit IgG |
| <b>Smad3</b>   | Abcam, ab40854<br>Lot. GR325567<br>Validated by Western Blot of Jurkat whole cell lysates                             | 1/1000 | IRDye® 800CW Goat anti-Rabbit IgG |
| <b>Nox2</b>    | Thermofisher, PA5-79118<br>Lot. YA3804004<br>Validated by Western Blot of mice and rat thymus tissue and brain lysate | 1/1000 | IRDye® 800CW Goat anti-Rabbit IgG |

80

81

82

83

84

85

86

87

88

89

90

91

92

93

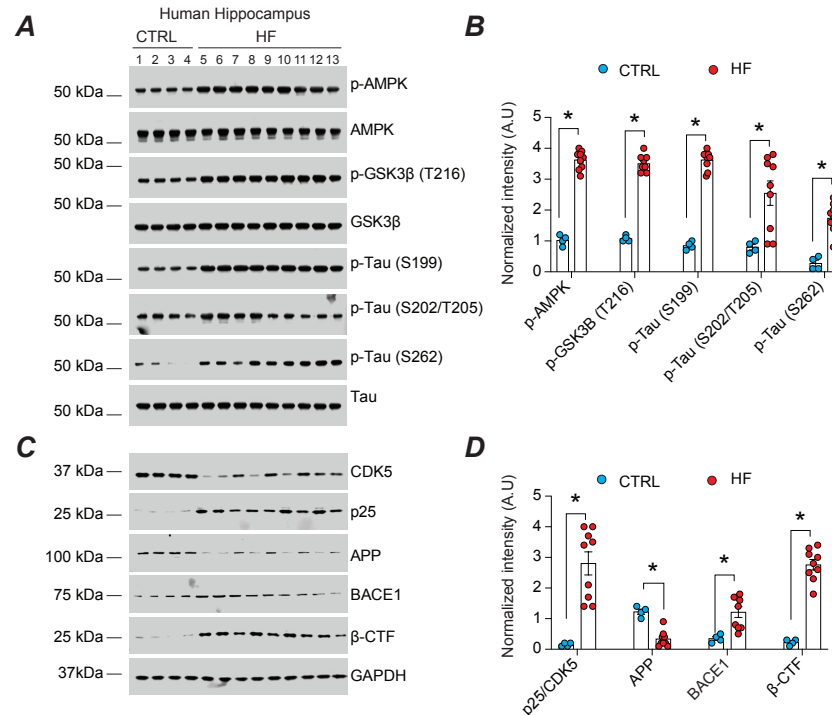

95

96 **Fig.S1. Alzheimer's-like signaling pathways in human HF.** **A)** Immunoblots showing phosphorylated and total AMPK, phosphorylated (on  
97 Thr216) and total GSK-β, phosphorylated Tau (on Ser199, Ser202/Thr205, and Ser262), and total Tau expression in the hippocampi of controls and  
98 HF patients. **B)** Bar graphs depicting the ratio of each protein phosphorylation to its total expression. **C)** Immunoblots showing the expression levels  
99 of CDK5, p25, APP, BACE1, β-CTF, and GAPDH in the hippocampi of control and HF patients. **D)** Bar graphs depicting the ratio of each protein  
100 expression to GAPDH and p25 to CDK5 expression levels. Controls (n=4), HF patients (n=9). Individual values are shown with mean±SEM (t-test  
101 \* p <0.05, Controls vs. HF patients). All statistical tests were two-sided. Data are derived from biologically independent samples. *Source file extended*  
102 *Fig.11.*

103

104

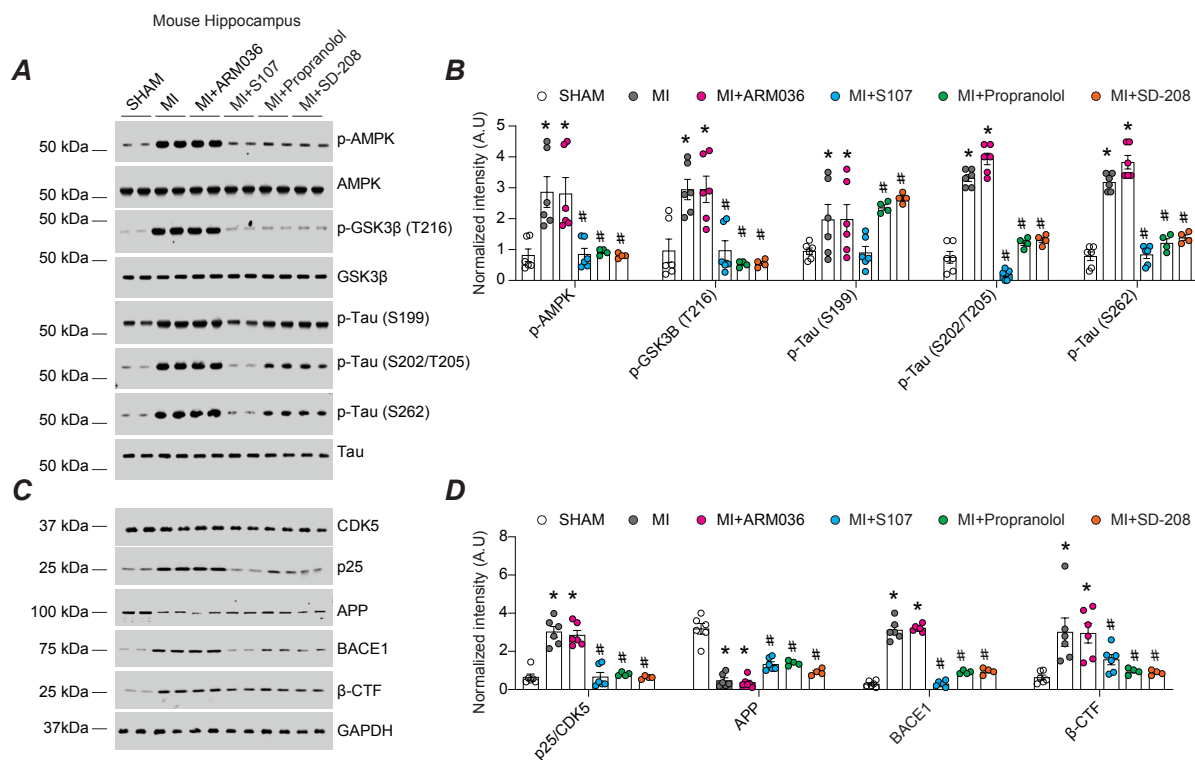

105

106 **Fig.S2. Alzheimer's-like signaling pathways in murine model of HF.** **A)** Immunoblots showing phosphorylated and total AMPK, phosphorylated  
 107 (on Thr216) and total GSK- $\beta$ , phosphorylated Tau (on Ser199, Ser202, Thr205, and Ser262), and total Tau expression in the hippocampi of SHAM,  
 108 MI, MI+ARM036, MI+S107, MI+ propranolol and MI+SD-208 mice. **B)** Bar graphs depicting the ratio of each protein phosphorylation to its total  
 109 expression. Sample size n=6 in SHAM, n=6 in MI, n=6 in MI+ARM036, n=6 in MI+S107, n=4 in MI+propranolol and n=4 in MI+SD-208. **C)**  
 110 Immunoblots showing the expression levels of CDK5, p25, APP, BACE1,  $\beta$ -CTF, and GAPDH in the hippocampi of SHAM, MI, MI+ARM036,  
 111 MI+S107, MI+ propranolol and MI+SD-208 mice. **D)** Bar graphs depicting the ratio of each protein level to GAPDH and p25 to CDK5 expression  
 112 levels. Sample size n=6 in SHAM, n=6 in MI, n=6 in MI+ARM036, n=6 in MI+S107, n=4 in MI+propranolol and n=4 in MI+SD-208. Individual  
 113 values are shown with mean $\pm$ SEM (One way-ANOVA and Tukey's test post-hoc correction for multiple comparisons show \* p <0.05, SHAM vs.  
 114 MI or MI+ARM036; #p<0.05, MI vs. MI+S107, MI+ propranolol or MI+SD-208). All statistical tests were two-sided. Data are derived from  
 115 biologically independent samples. Source file Extended Fig.12.

116

117 Extended Figure Legends:

118 **Extended Data Fig.1: Murine model of leaky RyR2 (phospho-memetic mutation) is associated with cognitive dysfunction.** **A)** Open field test  
119 of SHAM (n=14), S2808A-SHAM (n=8), S2808A-MI (n=8), S2808D (n=13), and S2808D+S107 (n=8) mice. Ratios of total time spent in the center  
120 area versus periphery area within first (1st) 3min and second (2nd) 3min are shown. **B)** Elevated plus maze test in SHAM (n=14), S2808A-SHAM  
121 (n=8), S2808A-MI (n=8), S2808D (n=13), and S2808D+S107 (n=8) mice. Ratios of time spent on the open-arm versus closed-arm are shown. **C)**  
122 Novel object recognition test in SHAM (n=14), S2808A-SHAM (n=8), S2808A-MI (n=8), S2808D (n=13), and S2808D+S107 (n=8) mice.  
123 Discrimination index is shown. **D)** Morris water maze test (learning curves) in SHAM (n=14), S2808A-SHAM (n=8), S2808A-MI (n=8), S2808D  
124 (n=13), and S2808D+S107 (n=8) mice. **E)** Probe trials after escape platform removed in the same groups showing the total duration spent in the  
125 target quadrant. **F)** Number of target crossings SHAM (n=14), S2808A-SHAM (n=8), S2808A-MI (n=8), S2808D (n=13), and S2808D+S107 (n=8)  
126 mice. **G)** Heat maps showing the latency from each group at Day 2 and Day 4. Individual values are shown with mean  $\pm$  SEM (t-test \* p <0.05 in  
127 panel **A** shows significance between the first 3min and second 3min of the same groups. One-way ANOVA was used to compare the difference  
128 between the 5 groups in panel B, C, E and F; Two-way ANNOVA was used in panel D. Tukey's test post-hoc correction for multiple comparisons  
129 was used; \* p <0.05, S2808A-SHAM vs. S2808D or S2808D+S107; # p<0.05, S2808D vs. S2808D+S107. No differences were detected between  
130 S2808A-SHAM and S2808A-MI. All statistical tests were two-sided. Data are derived from biologically independent samples.

131 **Extended Data Fig.2: Cognitive function in RyR1-S2844D mice.** Open field test using WT mice (n=10) and a mouse model with leaky RyR1  
132 channels (S2844D) (n=21). Ratios of total time spent in the center area versus periphery area within first 3 min and second 3 min are shown. **B)**  
133 Elevated plus maze test in WT mice (n=10) and S2808D (n=21). Ratios of time spent in the open-arm versus closed-arm are shown. **C)** Novel object  
134 recognition test in WT mice (n=10) and S2808D (n=21). Discrimination index is shown. **D)** Morris water maze test (learning curves) in WT mice  
135 (n=10) and S2808D (n=21). **E)** Probe trials after escape platform removed in the same groups showing the total duration spent in the target quadrant  
136 in WT mice (n=10) and S2808D (n=21). **F)** Number of target crossings in WT mice (n=10) and S2808D (n=21). **G)** Heat maps showing the latency  
137 from each group at Day 2 and Day 5. Individual values are shown with mean $\pm$ SEM. T-test was used in panel A-C, E-F, \* p <0.05 in panel A shows  
138 significance between the first 3min and second 3min of each group). Two-way ANOVA was used in panel D. Tukey's test post-hoc correction for  
139 multiple comparisons was used. All statistical tests were two-sided. Data are derived from biologically independent samples.

140 **Extended Data Fig.3: Phospho-memetic mutation (RyR2-S2808D mice) induces ER Ca<sup>2+</sup> leak in the hippocampus.** **A-B)** Representative SDS-  
141 PAGE analysis and quantification of modified RyR2 and calstabin2 immunoprecipitated from hippocampus of S2808A-SHAM (n=4), S2808A-MI  
142 (n=4), S2808D (n=4), S2808D+S107 mice (n=4) (IP RyR2: Bands normalized to total RyR2); n=4 in each group. **C)** ER Ca<sup>2+</sup> leak measured in  
143 microsomes from hippocampi of S2808A-SHAM (n=4), S2808A-MI (n=4), S2808D, S2808D+S107 mice (n=4). **D)** Bar graphs represent the  
144 quantification of Ca<sup>2+</sup> leak as the percentage of uptake in all the experimental groups (n=4 per group). **E)** Single-channel traces of RyR2 incorporated  
145 in planar lipid bilayers with 150 nM Ca<sup>2+</sup> in the *cis* chamber, corresponding to representative experiments performed with hippocampal samples  
146 from S2808A-SHAM, S2808A-MI, S2808D, S2808D+S107 mice. **F-G-H)** RyR2 open probability (Po), mean open time (To), and mean close time  
147 (Tc) in S2808A-SHAM, S2808A-MI, S2808D, and S2808D+S107 mice (n=n=5, 5, 4 and 4 respectively). Individual values are shown with mean  $\pm$   
148 SEM. One way-ANOVA and Tukey's test post-hoc correction for multiple comparisons shows \* p <0.05, S2808A-SHAM vs. S2808D or

149 S2808D+S107; # p<0.05, S2808D vs. S2808D+S107. No differences were detected between S2808A-SHAM and S2808A-MI. All statistical tests  
150 were two-sided. Data are derived from biologically independent samples.

151

152 **Extended Data Fig.4: TGF- $\beta$  activation in HF.** **A)** Immunoblots showing expressing levels of TGF- $\beta$ , phosphorylated SMAD3, total SMAD3,  
153 and NOX2 binding to RyR2 in the hippocampi of controls (n=4) and HF patients (n=9). **B)** Bar graphs depicting the ratio of TGF- $\beta$  expression  
154 normalized to GAPDH, phosphorylated SMAD3 to total SMAD3 and NOX2 binding to RyR2 (IP RyR2). Same quantity of proteins were loaded on  
155 two separate gels and blotted separately for SMAD3 and pSMAD3. Individual values are shown with mean  $\pm$  SEM (t-test \* p <0.05, Controls vs.  
156 HF patients). **C)** Immunoblots showing expressing levels of TGF- $\beta$ , phosphorylated SMAD3, total SMAD3, and NOX2 binding to RyR2 in the  
157 hippocampi of SHAM, MI, MI+ARM036, MI+S107, MI+ propranolol and MI+SD-208 mice (n=6, 6, 6, 6, 4 and 4 respectively). **D)** Bar graphs  
158 depicting the ratio of TGF- $\beta$  expression normalized to GAPDH, phosphorylated SMAD3 to total SMAD3 and NOX2 binding to RyR2 (IP RyR2).  
159 Same quantity of proteins were loaded on two separate gels and blotted separately for SMAD3 and pSMAD3. Individual values are shown with  
160 mean $\pm$ SEM. One-way ANOVA and Tukey's test post-hoc correction for multiple comparisons shows \* p <0.05, SHAM vs. MI, MI+ARM036 or  
161 MI+S107; #p<0.05, MI vs. MI+S107, MI+ propranolol or MI+SD-208. All statistical tests were two-sided. Data are derived from biologically  
162 independent samples.

163 **Extended Data Fig.5: Pre-ranked gene set enrichment analysis (GSEA) of the hippocampal proteomics.** Dot plots show: **A)** Top 20 up- and  
164 top 20 down-regulated GO biological process, **B)** top 10 up- and top 20 down-regulated GO cellular component, **C)** top 10 up- and top 20 down-  
165 regulated GO molecular function terms. Significantly changed protein abundance was determined by unpaired t-test with a threshold for significance  
166 of p <0.05 (permutation-based FDR correction), fold-change  $\geq$ 1.5, unique peptides  $\geq$ 2. Data are derived from biologically independent samples. All  
167 statistical tests were two-sided. *Source file MassIVE MSV000091695.*

168

169 **Extended Data Fig.6: Gene set enrichment analysis (GSEA) of the hippocampal proteomics.** The enrichment plots of representative KEGG  
170 pathway gene sets demonstrate that oxidative phosphorylation (**A**), Parkinson's disease (**B**), Alzheimer's disease (**C**), and Huntington's disease (**D**)  
171 are significantly enriched in MI compared to SHAM. The heatmap on the right side of each panel visualizes the genes contributing to the enriched  
172 pathways. For the detailed list see *Supplementary Table 8*. Signal-to-noise ratio was used to rank the genes per their correlation with either MI  
173 phenotype (red) or SHAM phenotype (blue). The y-axis represents enrichment score (ES) and on the x-axis are genes (vertical black lines)  
174 represented in gene sets. The GSEA analysis calculates an enrichment score (the maximum deviation from zero) reflecting the degree of over-  
175 representation of a gene set at the top or the bottom of the ranked gene list. A positive ES indicates gene set enrichment at the top of the ranked list;  
176 a negative ES indicates gene set enrichment at the bottom of the ranked list. NES, normalized enrichment score; FDR, FDR adjusted p-value.

177

178 **Extended Data Fig.7: RNA sequencing analysis.** RNA-sequencing was performed on the hippocampi of SHAM and MI mice (n=4 for each group).  
179 **A)** The Volcano plot shows differentially expressed genes (p-adj<0.05, fold-change ≥1.3) in SHAM and MI mice. Red indicates up-regulated, while  
180 blue represents down-regulated genes. Black indicates unchanged expression levels. **B)** The heat map shows significantly dysregulated genes (down-  
181 regulated: 2003, up-regulated: 1149 genes), the color scale bar shows the row normalized log<sub>2</sub> protein abundance. **C)** Dot plots show top 10 GO  
182 biological processes, **D)** molecular functions, **E)** cellular components, and **F)** KEGG pathways that were enriched from differentially expressed  
183 genes. Significantly changed gene abundance was determined by unpaired t-test with a threshold for significance of p <0.05 (permutation-based  
184 FDR correction), fold-change ≥1.5. Data are derived from biologically independent samples. All statistical tests were two-sided. *See Supplementary*  
185 *Table 9 for gene list. Data are accessible on SRA- Accession: PRJNA956662.*

186 **Extended Data Fig.8: Pre-ranked gene set enrichment analysis (GSEA) of RNA sequencing.** Dot plots show: **A)** Top 20 up- and top 20 down-  
187 regulated GO biological process, **B)** top 20 up- and top 20 down-regulated GO cellular component, **C)** top 20 up- and top 20 down-regulated GO  
188 molecular function terms. Significantly changed gene abundance was determined by unpaired t-test with a threshold for significance of p <0.05  
189 (permutation-based FDR correction), fold-change ≥1.5. Data are derived from biologically independent samples. All statistical tests were two-sided.

190 **Extended Data Fig.9: Gene set enrichment analysis (GSEA) of the hippocampal RNA sequencing.** The enrichment plots of representative  
191 KEGG pathway gene sets demonstrate that oxidative phosphorylation **(A)**, Parkinson's disease **(B)**, Alzheimer's disease **(C)**, and Huntington's  
192 disease **(D)** are significantly enriched in MI compared to SHAM. The heatmap on the right side of each panel visualizes the genes contributing to  
193 the enriched pathways. For the detailed list, *see Supplementary Table 10*. Signal-to-Noise ratio was used to rank the genes per their correlation with  
194 either MI phenotype (red) or SHAM phenotype (blue). The y-axis represents enrichment score (ES) and on the x-axis are genes (vertical black lines)  
195 represented in gene sets. The GSEA analysis calculates an enrichment score (the maximum deviation from zero) reflecting the degree of over-  
196 representation of a gene set at the top or the bottom of the ranked gene list. A positive ES indicates gene set enrichment at the top of the ranked list;  
197 a negative ES indicates gene set enrichment at the bottom of the ranked list. NES, normalized enrichment score; FDR, FDR adjusted p-value.

198 **Extended Data Fig.10: Mitochondrial Ca<sup>2+</sup> overload and oxidative stress in HF.** **A)** Cohort plot representation of differentially expressed  
199 mitochondrial proteins (SHAM vs MI) from 4 significantly enriched mitochondrial GO-terms and generated by GOplot. The color map represents  
200 fold change of proteins (log<sub>2</sub> scale). **B)** Ca<sup>2+</sup> accumulation in isolated mitochondria from SHAM (n=6), MI (n=5), MI+ARM036 (n=5), and MI+S107  
201 (n=5) mice. **C)** Reactive oxygen species (ROS) production in isolated mitochondria from SHAM (n=6), MI (n=6), MI+ARM036 (n=6), and MI+S107  
202 (n=5) mice. Individual values are shown with mean±SEM (one-way ANOVA and Tukey's test post-hoc correction for multiple comparisons show  
203 \* p <0.05, SHAM vs. MI or MI+ARM036; #p<0.05, MI vs. MI+S107). All statistical tests were two-sided.

204

205

206

207

208

209 **Full uncut gels shown in the supplementary figures.**

210 **Fig.S1. Alzheimer's-like signaling pathways in human HF**

## Human tissues

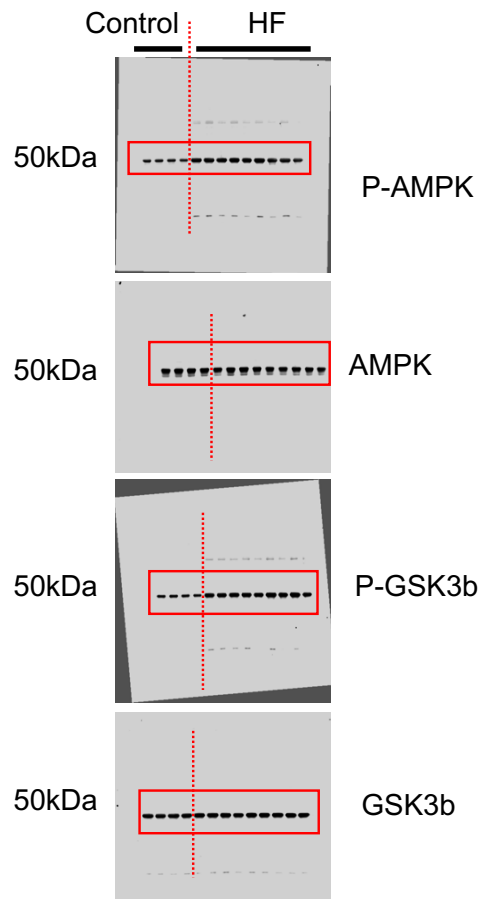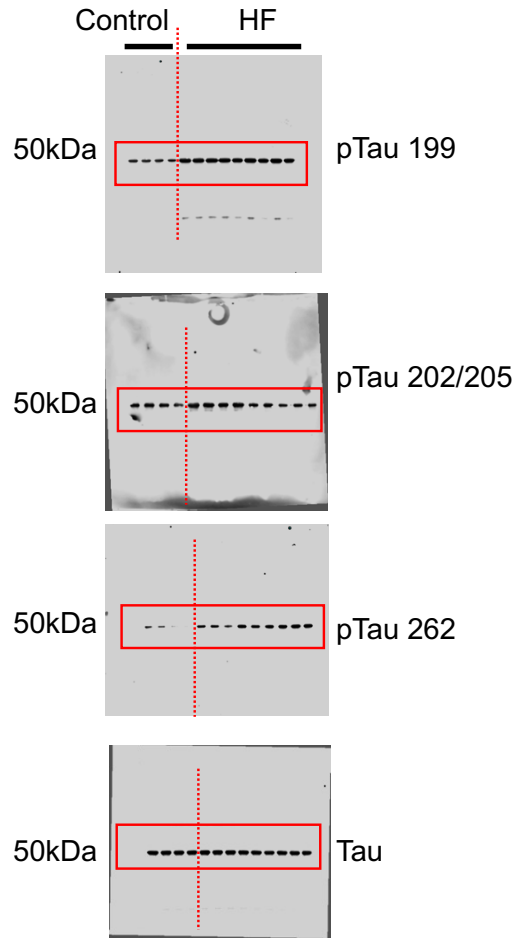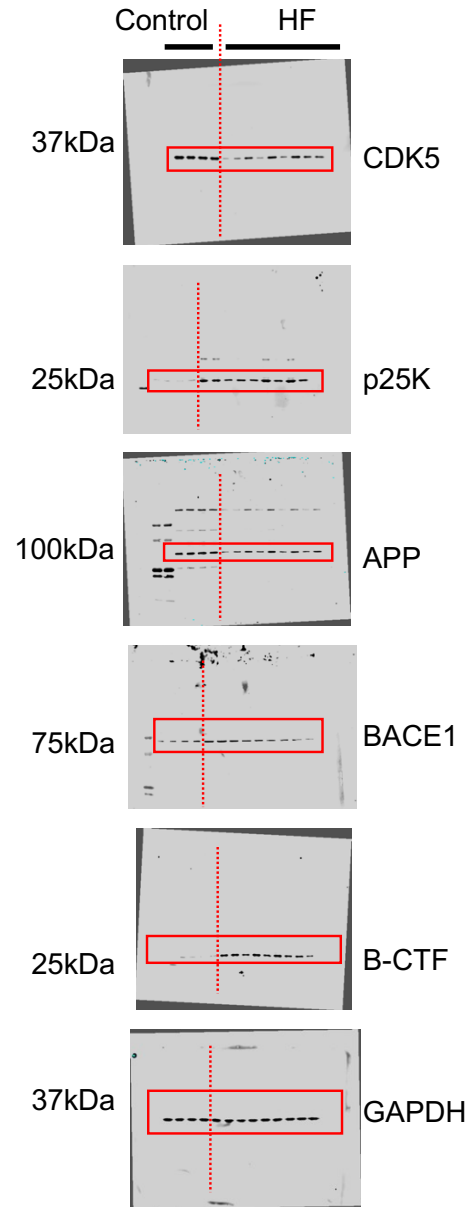



Mouse tissues

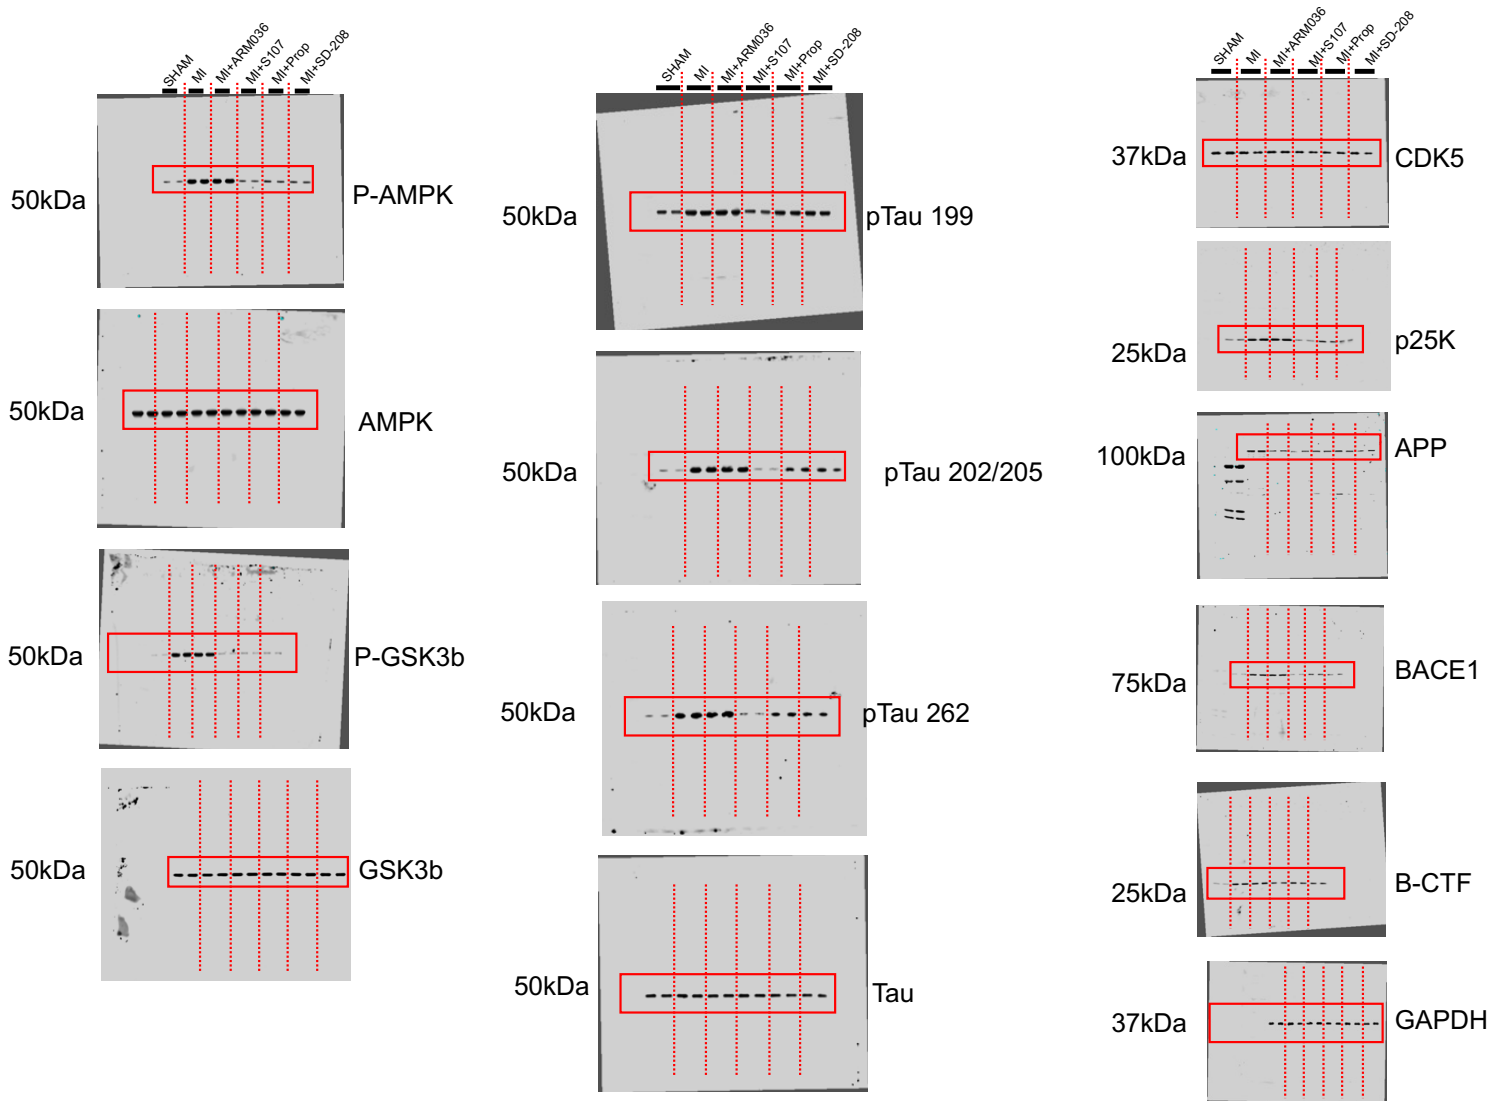

214 **Rstudio used codes.**

215

216 **Figure 6A, ED\_Fig7A**

217

218 library(ggplot2)

219 library(clusterProfiler)

220 library(org.Mm.eg.db)

221 library(stringr)

222 library(GOplot)

223

224 DEG<-read.csv("FULL.csv",header=T)

225

226 DEG\$significant = as.factor(ifelse(DEG\$padj < 0.05 & abs(DEG\$log2FoldChange) > 0.58,

227 ifelse(DEG\$log2FoldChange > 0.58,'up','down'),'no'))

228 table(DEG\$significant)

229

230 g <- ggplot(data=DEG,

231 aes(x=log2FoldChange,

232 y=-log10(padj),color=significant)) +

233 geom\_point(alpha=0.4, size=1.75) + theme\_bw() +

234 theme(panel.grid.major=element\_line(colour=NA),

```
235     panel.background = element_rect(fill = "transparent",colour = NA)) +
236     xlab("log2 fold change") +
237     ylab("-log10 p-adj") +
238     theme(plot.title = element_text(size=15,hjust = 0.5)) +
239     geom_hline(yintercept=1.30102999566 ,linetype=4) +
240     geom_vline(xintercept=c(-0.58,0.58) ,linetype=4 ) +
241     scale_colour_manual(values = c('blue','black','red'))
242
243     print(g)
244
245
246
247     DEG<-read.csv("FC1.5.csv",header=T)
248
249     all_gene_id<-DEG$Gene
250     length(all_gene_id)
251     keytypes(org.Mm.eg.db)
252     all_gene_id_to_ENTREZID = bitr(all_gene_id, fromType="SYMBOL", toType="ENTREZID", OrgDb="org.Mm.eg.db")
253
254
255
256     Figure 6C, ED_Fig7C
```

```
257 ego_BP <- enrichGO(gene = all_gene_id_to_ENTREZID$ENTREZID,
258                   OrgDb = org.Mm.eg.db,
259                   ont = "BP",
260                   pAdjustMethod = "BH",
261                   pvalueCutoff = 0.05,
262                   qvalueCutoff = 0.2,
263                   readable = TRUE)
264 p1 <- dotplot(ego_BP, showCategory=10,title="GO Biological Processes")
265 p2 <- p1 + scale_y_discrete(labels = function(y) str_wrap(y, width = 40))
266 p2
267
```

268 **Figure 6D, ED\_Fig7D**

```
269 ego_MF <- enrichGO(gene = all_gene_id_to_ENTREZID$ENTREZID,
270                   OrgDb = org.Mm.eg.db,
271                   ont = "MF",
272                   pAdjustMethod = "BH",
273                   pvalueCutoff = 0.05,
274                   qvalueCutoff = 0.2,
275                   readable = TRUE)
276 p1 <- dotplot(ego_MF, showCategory=10,title="GO Molecular Functions")
277 p2 <- p1 + scale_y_discrete(labels = function(y) str_wrap(y, width = 40))
278 p2
```

279

280 **Figure 6E, ED\_Fig7E**

```
281 ego_CC <- enrichGO(gene = all_gene_id_to_ENTREZID$ENTREZID,  
282     OrgDb      = org.Mm.eg.db,  
283     ont        = "CC",  
284     pAdjustMethod = "BH",  
285     pvalueCutoff = 0.05,  
286     qvalueCutoff = 0.2,  
287     readable    = TRUE)  
288 p1 <- dotplot(ego_CC, showCategory=10,title="GO Cellular Components")  
289 p2 <- p1 + scale_y_discrete(labels = function(y) str_wrap(y, width = 40))  
290 p2
```

291

292 **Figure 6F, ED\_Fig7F**

```
293 KEGG_all <- enrichKEGG(gene      = all_gene_id_to_ENTREZID$ENTREZID,  
294     organism   = "mmu",  
295     keyType    = "kegg",  
296     pvalueCutoff = 0.05,  
297     pAdjustMethod = "BH",  
298     qvalueCutoff = 0.2)  
299 KEGG_allx <- setReadable(KEGG_all, 'org.Mm.eg.db', 'ENTREZID')  
300 p1 <- dotplot(KEGG_allx, showCategory=10,title="KEGG pathways")
```

```
301 p2 <- p1 + scale_y_discrete(labels = function(y) str_wrap(y, width = 40))
302 p2
303 cnetplot(KEGG_allx, showCategory = 6, circular = TRUE, colorEdge = TRUE, node_label = "category")
304
305
306 Figure 7A, ED_Fig10A
307 go<-read.csv("go.csv",header=T)
308
309 genelist<-read.csv("genelist.csv",header=T)
310
311 genename <- NULL
312
313 for (i in c(1:6)){
314
315   list <- c(go[i,4])
316
317   temp <- strsplit(list,",")[[1]]
318
319   genename <- append(genename,temp,after = length(genename))}
320
321 genename <- genename[-which(duplicated(genename))]
322
```

```
323 diffgene <- genelist[which(genelist$ID %in% genename),]
324 diffgene$logFC <- as.numeric(diffgene$logFC)
325 circ <- circle_dat(go,diffgene)
326 diffgene$ID <- toupper(diffgene$ID)
327 process<-read.csv("process.csv",header=T)
328 process<-process[1:6,]
329 chord <- chord_dat(circ,diffgene,process)
330
331 GOChord(chord, title="GOChord plot",
332         space = 0.02,
333         limit = c(3, 5),
334         gene.order = 'logFC', gene.space = 0.25, gene.size = 4,
335         lfc.col=c('red', 'white','green'),
336         ribbon.col=colorRampPalette(c("royalblue3", "gray98"))(6),border.size=NA,process.label=8)
337
338
339 Figure ED_Fig5 and ED_Fig8
340 gene<-read.csv("MS preranked gene list.csv",header=T)
341 genesymbol<-gene$SYMBOL
342 length(genesymbol)
343 ENTREZID = bitr(genesymbol, fromType="SYMBOL", toType="ENTREZID", OrgDb="org.Mm.eg.db")
344 gene_df <- data.frame(logFC=gene$logFC, SYMBOL = gene$SYMBOL)
```

```
345 gene_df <- merge(gene_df,ENTREZID,by="SYMBOL")
346 sortdf<-gene_df[order(gene_df$logFC, decreasing = T),]
347 gene.expr = sortdf$logFC
348 names(gene.expr) <- sortdf$ENTREZID
349
350 GOBP<-gseGO(
351   gene.expr,
352   ont = "BP",
353   OrgDb= org.Mm.eg.db,
354   keyType = "ENTREZID",
355   exponent = 1,
356   minGSSize = 10,
357   maxGSSize = 500,
358   eps = 1e-10,
359   pvalueCutoff = 0.05,
360   pAdjustMethod = "BH",
361   verbose = TRUE,
362   seed = FALSE,
363   by = "fgsea")
364
365 p1 <- dotplot(GOBP,split=".sign",title="GO Biological Processes")+facet_grid(~.sign)
366 p2 <- p1 + scale_y_discrete(labels = function(y) str_wrap(y, width = 40))
```



```
367 p2
368
369
370 GOCC<-gseGO(
371   gene.expr,
372   ont = "CC",
373   OrgDb= org.Mm.eg.db,
374   keyType = "ENTREZID",
375   exponent = 1,
376   minGSSize = 10,
377   maxGSSize = 500,
378   eps = 1e-10,
379   pvalueCutoff = 0.05,
380   pAdjustMethod = "BH",
381   verbose = TRUE,
382   seed = FALSE,
383   by = "fgsea")
384
385 p1 <- dotplot(GOCC,split=".sign",title="GO Cellular Components")+facet_grid(~.sign)
386 p2 <- p1 + scale_y_discrete(labels = function(y) str_wrap(y, width = 40))
387 p2
388
```

```
389 GOMF<-gseGO(  
390   gene.expr,  
391   ont = "MF",  
392   OrgDb= org.Mm.eg.db,  
393   keyType = "ENTREZID",  
394   exponent = 1,  
395   minGSSize = 10,  
396   maxGSSize = 500,  
397   eps = 1e-10,  
398   pvalueCutoff = 0.05,  
399   pAdjustMethod = "BH",  
400   verbose = TRUE,  
401   seed = FALSE,  
402   by = "fgsea")  
403 p1 <- dotplot(GOMF,split=".sign",title="GO Molecular Functions")+facet_grid(~.sign)  
404 p2 <- p1 + scale_y_discrete(labels = function(y) str_wrap(y, width = 40))  
405 p2  
406  
407  
408  
409  
410
```

411 **References**

412

413

- 414 1 Meier, F. *et al.* diaPASEF: parallel accumulation-serial fragmentation combined with data-independent acquisition. *Nat Methods*  
415 **17**, 1229-1236, doi:10.1038/s41592-020-00998-0 (2020).
- 416 2 Kulak, N. A., Pichler, G., Paron, I., Nagaraj, N. & Mann, M. Minimal, encapsulated proteomic-sample processing applied to  
417 copy-number estimation in eukaryotic cells. *Nat Methods* **11**, 319-324, doi:10.1038/nmeth.2834 (2014).
- 418 3 Adachi, J. *et al.* Improved Proteome and Phosphoproteome Analysis on a Cation Exchanger by a Combined Acid and Salt  
419 Gradient. *Anal Chem* **88**, 7899-7903, doi:10.1021/acs.analchem.6b01232 (2016).
- 420 4 Bruderer, R. *et al.* Extending the limits of quantitative proteome profiling with data-independent acquisition and application to  
421 acetaminophen-treated three-dimensional liver microtissues. *Mol Cell Proteomics* **14**, 1400-1410,  
422 doi:10.1074/mcp.M114.044305 (2015).
- 423 5 Zhou, L. *et al.* Bioinformatics analyses of significant genes, related pathways and candidate prognostic biomarkers in  
424 glioblastoma. *Mol Med Rep* **18**, 4185-4196, doi:10.3892/mmr.2018.9411 (2018).
- 425 6 Chen, C. *et al.* TBtools: An Integrative Toolkit Developed for Interactive Analyses of Big Biological Data. *Mol Plant* **13**, 1194-  
426 1202, doi:10.1016/j.molp.2020.06.009 (2020).
- 427 7 Yu, G., Wang, L. G., Han, Y. & He, Q. Y. clusterProfiler: an R package for comparing biological themes among gene clusters.  
428 *OMICS* **16**, 284-287, doi:10.1089/omi.2011.0118 (2012).
- 429 8 Subramanian, A. *et al.* Gene set enrichment analysis: a knowledge-based approach for interpreting genome-wide expression  
430 profiles. *Proc Natl Acad Sci U S A* **102**, 15545-15550, doi:10.1073/pnas.0506580102 (2005).
- 431 9 Griffith, M., Walker, J. R., Spies, N. C., Ainscough, B. J. & Griffith, O. L. Informatics for RNA Sequencing: A Web Resource for  
432 Analysis on the Cloud. *PLoS Comput Biol* **11**, e1004393, doi:10.1371/journal.pcbi.1004393 (2015).
- 433 10 Hickman, R. A. *et al.* Gonadotroph tumours with a low SF-1 labelling index are more likely to recur and are associated with  
434 enrichment of the PI3K-AKT pathway. *Neuropathol Appl Neurobiol* **47**, 415-427, doi:10.1111/nan.12675 (2021).

435

436

437

438

439
