# Supplementary material for: Heart failure-induced cognitive dysfunction is mediated by intracellular Ca2+ leak through ryanodine receptor type 2
Source: PubMed Central journal article supplement (PMC10400432; doi:10.1038/s41593-023-01377-6), 2023-07-10
Supplement: 41593_2023_1377_MOESM4_ESM.pdf [file 41593_2023_1377_MOESM4_ESM.pdf]

Figure 1A

RyR2: IP- human tissues

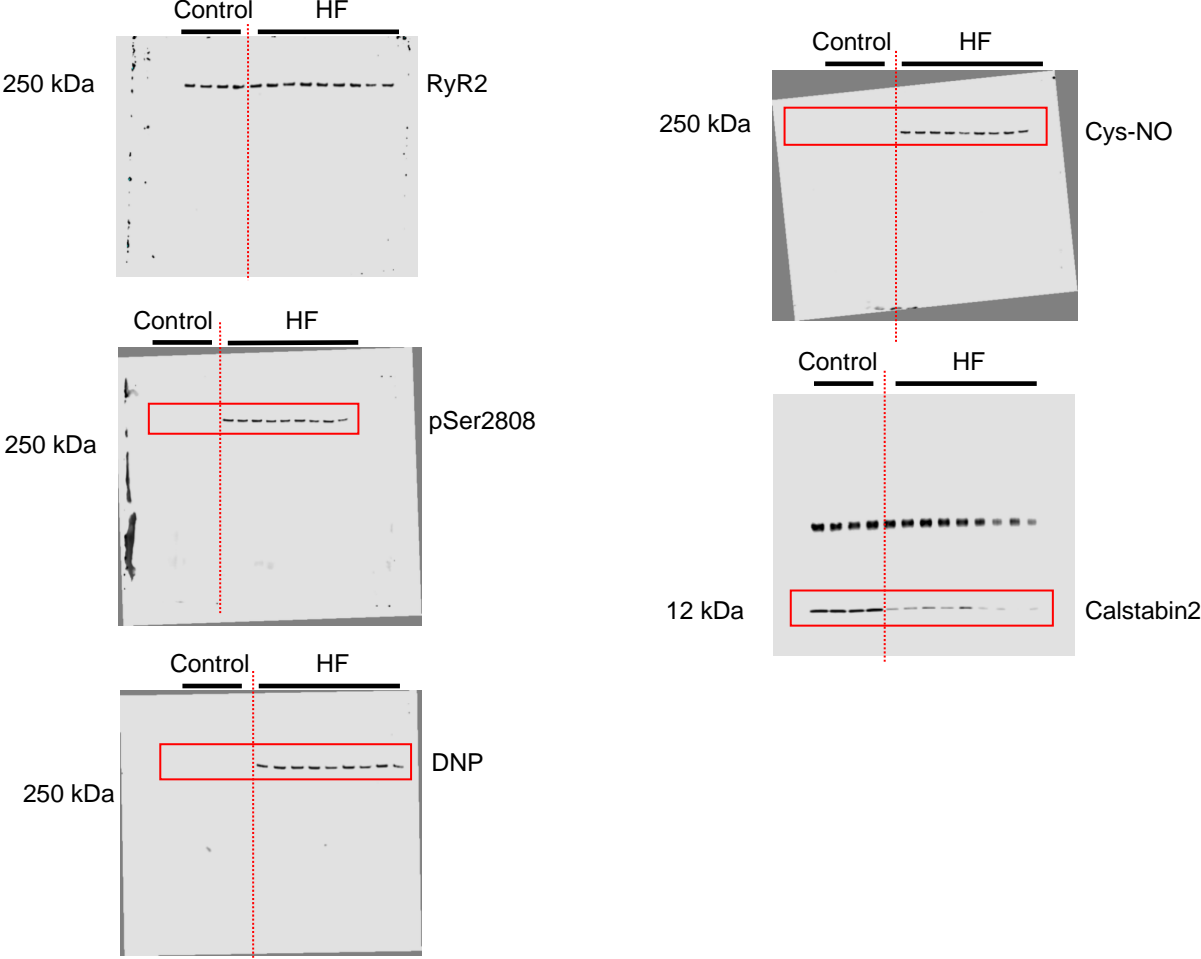

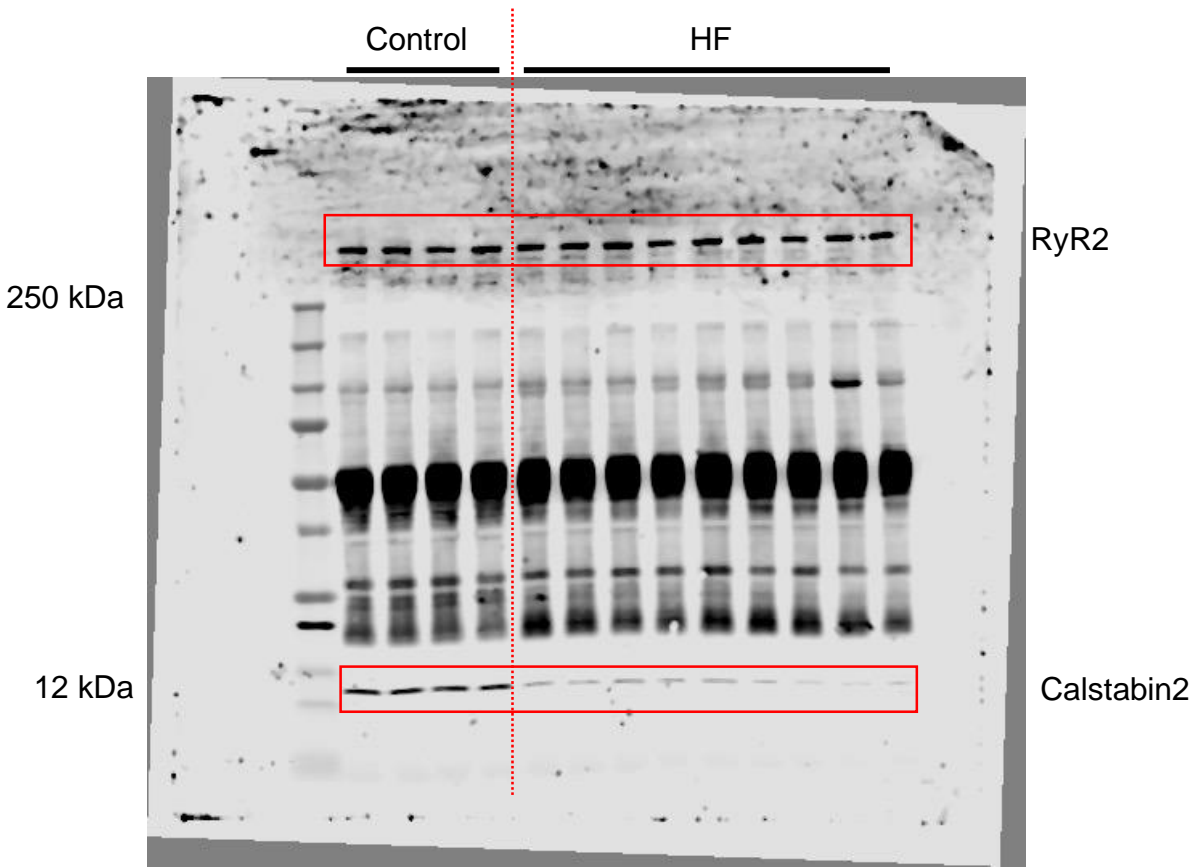

Loading Control gel showing even IgG and Total RyR2

**Figure 1B**

|                   | Control |     |     |     | Patient |     |     |     |     |     |     |     |     |  |
|-------------------|---------|-----|-----|-----|---------|-----|-----|-----|-----|-----|-----|-----|-----|--|
| <b>pSer2808</b>   | 0.1     | 0   | 0.1 | 0.2 | 3.5     | 3.6 | 3.8 | 3.7 | 3.1 | 3.6 | 2.9 | 3.7 | 3   |  |
| <b>DNP</b>        | 0       | 0   | 0.1 | 0.1 | 3.5     | 3.8 | 3.7 | 3.9 | 3.7 | 3.5 | 2.9 | 3   | 2.8 |  |
| <b>Cys-NO</b>     | 0.1     | 0   | 0   | 0.1 | 3.5     | 3.8 | 3.5 | 3.6 | 2.7 | 3.7 | 3.2 | 3.5 | 3.3 |  |
| <b>Calstabin2</b> | 4       | 3.8 | 3.6 | 3.9 | 0.5     | 0.6 | 0.7 | 0.5 | 0.8 | 0.3 | 0.5 | 0.2 | 0.3 |  |

**Figure 1C\_D**

**Open probability**

| Control | Patient |
|---------|---------|
| 0.007   | 0.189   |
| 0.022   | 0.224   |
| 0.012   | 0.102   |
| 0.018   | 0.32    |
| 0.009   | 0.17    |
|         | 0.154   |
|         | 0.237   |
|         | 0.186   |
|         | 0.1371  |

**Open Time (ms)**

| Control | Patient |
|---------|---------|
| 2.1     | 18.6    |
| 3.1     | 21.3    |
| 1.7     | 12.9    |
| 2.1     | 15.7    |
| 1.6     | 27.6    |
|         | 31.2    |
|         | 17.4    |
|         | 12.3    |
|         | 9.36    |

### Close Time (ms)

| Control | Patient |
|---------|---------|
| 543.6   | 72.1    |
| 387.6   | 38.3    |
| 698.3   | 84.2    |
| 487.2   | 44.7    |
| 458.1   | 55.6    |
|         | 42.5    |
|         | 67.3    |
|         | 71.2    |
|         | 53.6    |

Figure 1E

| Time | Control 1 |     |     |     | HF  |     |     |     |     |     |     |     |     |  |
|------|-----------|-----|-----|-----|-----|-----|-----|-----|-----|-----|-----|-----|-----|--|
| 0    | 100       | 98  | 100 | 100 | 100 | 100 | 98  | 99  | 100 | 100 | 100 | 100 | 100 |  |
| 5    | 100       | 100 | 100 | 99  | 100 | 99  | 97  | 100 | 100 | 100 | 99  | 99  | 98  |  |
| 10   | 100       | 99  | 99  | 98  | 100 | 98  | 98  | 99  | 99  | 98  | 100 | 99  | 99  |  |
| 15   | 98        | 100 | 98  | 99  | 98  | 97  | 99  | 98  | 98  | 99  | 99  | 98  | 98  |  |
| 20   | 101       | 99  | 98  | 100 | 98  | 99  | 100 | 100 | 97  | 99  | 99  | 100 | 99  |  |
| 25   | 98        | 100 | 99  | 100 | 99  | 100 | 99  | 101 | 99  | 100 | 99  | 100 | 100 |  |
| 30   | 98        | 99  | 99  | 98  | 100 | 99  | 97  | 99  | 100 | 98  | 99  | 99  | 99  |  |
| 35   | 100       | 98  | 97  | 99  | 98  | 99  | 96  | 99  | 99  | 99  | 100 | 98  | 98  |  |
| 40   | 99        | 100 | 101 | 100 | 99  | 100 | 99  | 100 | 98  | 100 | 99  | 100 | 100 |  |
| 45   | 100       | 101 | 100 | 100 | 100 | 98  | 97  | 99  | 100 | 99  | 100 | 99  | 100 |  |
| 50   | 99        | 99  | 100 | 99  | 100 | 99  | 97  | 99  | 99  | 98  | 97  | 100 | 99  |  |
| 55   | 80        | 83  | 78  | 81  | 74  | 67  | 77  | 73  | 75  | 77  | 70  | 73  | 73  |  |
| 60   | 52        | 49  | 45  | 48  | 47  | 43  | 51  | 43  | 47  | 50  | 40  | 44  | 44  |  |
| 65   | 33        | 36  | 30  | 36  | 34  | 32  | 37  | 32  | 40  | 43  | 33  | 37  | 35  |  |
| 70   | 34        | 32  | 30  | 33  | 33  | 32  | 35  | 32  | 48  | 36  | 30  | 35  | 33  |  |
| 75   | 35        | 33  | 33  | 34  | 33  | 30  | 35  | 35  | 40  | 38  | 32  | 38  | 34  |  |
| 80   | 33        | 35  | 34  | 33  | 32  | 33  | 36  | 34  | 39  | 36  | 34  | 39  | 35  |  |
| 85   | 34        | 36  | 35  | 36  | 33  | 35  | 37  | 35  | 38  | 34  | 33  | 38  | 33  |  |
| 90   | 35        | 35  | 32  | 35  | 35  | 37  | 39  | 34  | 40  | 35  | 33  | 36  | 36  |  |
| 95   | 34        | 32  | 26  | 33  | 33  | 39  | 41  | 34  | 38  | 36  | 34  | 37  | 35  |  |
| 100  | 35        | 36  | 35  | 34  | 34  | 34  | 37  | 35  | 40  | 36  | 35  | 38  | 34  |  |
| 105  | 42        | 38  | 34  | 41  | 68  | 64  | 73  | 70  | 70  | 75  | 63  | 73  | 60  |  |
| 110  | 43        | 40  | 31  | 43  | 69  | 60  | 71  | 75  | 72  | 75  | 65  | 75  | 62  |  |
| 115  | 42        | 38  | 37  | 41  | 73  | 64  | 70  | 73  | 70  | 77  | 64  | 73  | 63  |  |
| 120  | 41        | 35  | 34  | 40  | 70  | 66  | 67  | 72  | 72  | 74  | 65  | 74  | 66  |  |
| 125  | 40        | 38  | 35  | 35  | 71  | 60  | 65  | 69  | 72  | 75  | 66  | 75  | 64  |  |
| 130  | 42        | 39  | 35  | 41  | 68  | 62  | 68  | 73  | 70  | 72  | 68  | 72  | 62  |  |
| 135  | 42        | 40  | 38  | 39  | 68  | 64  | 69  | 74  | 69  | 75  | 66  | 70  | 63  |  |
| 140  | 41        | 37  | 40  | 40  | 73  | 66  | 72  | 69  | 69  | 74  | 65  | 72  | 63  |  |
| 145  | 40        | 35  | 41  | 41  | 69  | 68  | 73  | 71  | 70  | 76  | 64  | 74  | 66  |  |
| 150  | 42        | 34  | 40  | 41  | 73  | 70  | 70  | 74  | 69  | 72  | 66  | 76  | 64  |  |
| 155  | 42        | 37  | 38  | 40  | 76  | 70  | 67  | 74  | 68  | 74  | 65  | 75  | 62  |  |
| 160  | 41        | 38  | 40  | 38  | 74  | 65  | 65  | 72  | 64  | 74  | 64  | 75  | 63  |  |
| 165  | 40        | 36  | 36  | 36  | 72  | 67  | 68  | 75  | 66  | 75  | 63  | 75  | 65  |  |

|     |    |    |    |    |    |    |    |    |    |    |    |    |    |
|-----|----|----|----|----|----|----|----|----|----|----|----|----|----|
| 170 | 43 | 35 | 38 | 39 | 76 | 69 | 69 | 74 | 70 | 76 | 63 | 72 | 65 |
| 175 | 42 | 37 | 38 | 39 | 71 | 67 | 71 | 73 | 67 | 72 | 65 | 73 | 64 |
| 180 | 41 | 41 | 35 | 37 | 74 | 65 | 67 | 72 | 66 | 75 | 63 | 71 | 66 |
| 185 | 42 | 40 | 32 | 40 | 73 | 67 | 66 | 75 | 68 | 73 | 61 | 74 | 66 |
| 190 | 43 | 40 | 32 | 38 | 73 | 69 | 68 | 74 | 70 | 75 | 63 | 75 | 64 |
| 195 | 43 | 42 | 35 | 35 | 68 | 71 | 64 | 70 | 69 | 72 | 64 | 76 | 65 |
| 200 | 42 | 38 | 34 | 36 | 71 | 69 | 68 | 74 | 69 | 72 | 65 | 77 | 65 |
| 205 | 41 | 39 | 35 | 38 | 69 | 67 | 70 | 71 | 71 | 73 | 61 | 74 | 63 |
| 210 | 40 | 37 | 37 | 39 | 69 | 69 | 72 | 71 | 70 | 74 | 62 | 74 | 64 |
| 215 | 43 | 39 | 38 | 40 | 72 | 65 | 74 | 72 | 70 | 70 | 62 | 72 | 65 |
| 220 | 42 | 40 | 38 | 40 | 68 | 67 | 71 | 74 | 69 | 73 | 64 | 73 | 64 |
| 225 | 41 | 42 | 39 | 39 | 70 | 69 | 71 | 72 | 68 | 71 | 64 | 74 | 65 |
| 230 | 42 | 40 | 41 | 39 | 68 | 67 | 67 | 70 | 67 | 73 | 65 | 75 | 66 |
| 235 | 43 | 40 | 40 | 40 | 69 | 69 | 65 | 71 | 68 | 74 | 63 | 75 | 65 |
| 240 | 43 | 39 | 40 | 40 | 70 | 71 | 70 | 73 | 69 | 74 | 64 | 76 | 64 |
| 245 | 42 | 38 | 37 | 41 | 70 | 67 | 69 | 73 | 69 | 70 | 63 | 75 | 65 |
| 250 | 41 | 40 | 36 | 40 | 68 | 65 | 69 | 72 | 68 | 72 | 66 | 73 | 63 |
| 255 | 42 | 42 | 38 | 39 | 69 | 65 | 67 | 70 | 68 | 75 | 68 | 74 | 64 |
| 260 | 43 | 40 | 36 | 38 | 69 | 68 | 65 | 70 | 70 | 73 | 63 | 75 | 65 |
| 265 | 43 | 38 | 35 | 39 | 71 | 66 | 68 | 72 | 69 | 73 | 65 | 77 | 64 |
| 270 | 42 | 37 | 34 | 40 | 68 | 69 | 70 | 74 | 69 | 71 | 66 | 74 | 63 |
| 275 | 41 | 35 | 36 | 36 | 70 | 71 | 68 | 77 | 70 | 75 | 64 | 72 | 66 |
| 280 | 41 | 38 | 35 | 39 | 71 | 69 | 71 | 75 | 71 | 74 | 66 | 74 | 63 |
| 285 | 43 | 40 | 36 | 40 | 71 | 67 | 67 | 73 | 69 | 72 | 63 | 75 | 65 |
| 290 | 44 | 40 | 39 | 39 | 70 | 65 | 70 | 72 | 69 | 74 | 66 | 73 | 64 |
| 295 | 42 | 37 | 35 | 38 | 69 | 65 | 68 | 70 | 70 | 75 | 64 | 77 | 66 |
| 300 | 41 | 37 | 36 | 40 | 70 | 67 | 72 | 67 | 69 | 73 | 64 | 75 | 65 |
