# Supplementary material for: Heart failure-induced cognitive dysfunction is mediated by intracellular Ca2+ leak through ryanodine receptor type 2
Source: PubMed Central journal article supplement (PMC10400432; doi:10.1038/s41593-023-01377-6), 2023-07-10
Supplement: 41593_2023_1377_MOESM5_ESM.pdf [file 41593_2023_1377_MOESM5_ESM.pdf]

**Figure 2A**

| SHAM        | SHAM        | MI         | MI         | MI+ARM036  | MI+ARM036  | MI+S107    | MI+S107    | MI+Propranolol | MI+Propranolol | MI+SD208   | MI+SD208   |
|-------------|-------------|------------|------------|------------|------------|------------|------------|----------------|----------------|------------|------------|
| 0.078152753 | 0.36902951  | 0.2730486  | 0.31919976 | 0.10743596 | 0.12154696 | 0.09329446 | 0.25       | 0.1050037      | 0.29774957     | 0.22101252 | 0.28927752 |
| 0.164774228 | 0.162427133 | 0.09388265 | 0.38927012 | 0.1124319  | 0.26348315 | 0.10331288 | 0.17986366 | 0.06232295     | 0.64413592     | 0.04325462 | 0.23155007 |
| 0.118839836 | 0.306206089 | 0.14053216 | 0.35226586 | 0.16824645 | 0.21498371 | 0.12358134 | 0.21034204 | 0.05595985     | 0.23835767     | 0.18949045 | 0.23553833 |
| 0.186933333 | 0.60206995  | 0.10910886 | 0.73590734 | 0.14665304 | 0.25768586 | 0.17756764 | 0.34618861 | 0.07300672     | 0.09261084     | 0.12390707 | 0.29477935 |
| 0.1367942   | 0.2612108   | 0.17087783 | 0.52422907 | 0.15611269 | 0.09625276 | 0.09702584 | 0.18639599 | 0.09470069     | 0.12810852     | 0.29976785 | 0.36948529 |
| 0.0536791   | 0.140829    | 0.17026316 | 0.23018043 | 0.25735913 | 0.18294615 | 0.08095124 | 0.06034075 | 0.06057035     | 0.1319797      | 0.05338664 | 0.14741138 |
| 0.1592709   | 0.2998267   | 0.19082958 | 0.47783251 | 0.102457   | 0.16671008 | 0.14636055 | 0.19142176 | 0.06888361     | 0.21149177     | 0.10592283 | 0.14617593 |
| 0.07219443  | 0.4241633   | 0.14344158 | 0.16237315 | 0.13948718 | 0.06586117 | 0.17240473 | 0.32900177 | 0.14155251     | 0.2145749      | 0.13073048 | 0.13301241 |
| 0.06736243  | 0.2062726   | 0.09038042 | 0.16974266 | 0.17645496 | 0.16369279 | 0.05810312 | 0.19099141 | 0.12895133     | 0.22783083     | 0.17810561 | 0.11281653 |
| 0.08985227  | 0.06427009  | 0.15325474 | 0.25411896 | 0.22855675 | 0.34012225 | 0.3063976  | 0.2391505  | 0.34892086     | 0.59340659     | 0.14773959 | 0.52331175 |
| 0.2055455   | 0.3504389   | 0.34208172 | 0.30487805 | 0.13018797 | 0.16957344 | 0.11409458 | 0.2551652  |                |                | 0.10706431 | 0.41267717 |
| 0.08218601  | 0.424276    | 0.18796199 | 0.21055466 | 0.12958061 | 0.14481778 | 0.15362302 | 0.1433732  |                |                | 0.1084296  | 0.15923091 |
| 0.01288616  | 0.1216351   | 0.30890052 | 0.25628141 | 0.25314368 | 0.30000433 | 0.14162618 | 0.16528731 |                |                | 0.09547023 | 0.27337095 |
|             |             | 0.28132118 | 0.4720314  | 0.10897469 | 0.19659503 | 0.07055964 | 0.16397126 |                |                | 0.20010734 | 0.33949129 |
|             |             | 0.082642   | 0.0649     | 0.06163033 | 0.05179344 | 0.11447137 | 0.26651969 |                |                | 0.15540699 | 0.27531139 |
|             |             | 0.160841   | 0.160766   | 0.07064482 | 0.11510691 | 0.096959   | 0.11118    |                |                | 0.1013712  | 0.10539283 |
|             |             | 0.702772   | 0.351554   | 0.2158876  | 0.27864657 | 0.094957   | 0.337693   |                |                | 0.18110236 | 0.29570976 |
|             |             | 0.161215   | 0.153181   | 0.13915693 | 0.24411846 | 0.171722   | 0.276234   |                |                | 0.09547004 | 0.25770308 |
|             |             | 0.292918   | 0.097293   | 0.222826   | 0.25139    | 0.131151   | 0.342783   |                |                |            |            |
|             |             | 0.241379   | 0.22758    | 0.106059   | 0.186944   | 0.232033   | 0.363946   |                |                |            |            |
|             |             | 0.181723   | 0.12881    | 0.212775   | 0.183977   | 0.006599   | 0.057641   |                |                |            |            |
|             |             | 0.417658   | 0.20773    | 0.181257   | 0.33363    | 0.172333   | 0.257159   |                |                |            |            |
|             |             |            |            | 0.114689   | 0.056028   | 0.198003   | 0.284063   |                |                |            |            |
|             |             |            |            |            |            | 0.213429   | 0.265378   |                |                |            |            |

**Figure 2B**

| SHAM       | MI         | MI+ARM036  | MI+S107    | MI+Propranolol | MI+SD208   |
|------------|------------|------------|------------|----------------|------------|
| 0.25078111 | 0.06352887 | 0.08939343 | 0.03411951 | 0.14145382     | 0          |
| 0.08410064 | 0.20467164 | 0.26179841 | 0          | 0.05105421     | 0          |
| 0.10900206 | 0.06174951 | 0.15392979 | 0.11582657 | 0.08884476     | 0.14683215 |
| 1.23E-03   | 0          | 0.07414509 | 0.13991184 | 0.14873719     | 0.00932493 |
| 0.25000124 | 0.07884214 | 0.17219987 | 0.0430564  | 0.13106875     | 0.13436041 |
| 0.072355   | 0.05486215 | 0.05829592 | 0.07847283 | 0              | 0.17894303 |
| 0.192764   | 0.02619784 | 0.14783798 | 0.08859764 | 0              | 0.02606011 |
| 0.362629   | 0.65024185 | 0.36640511 | 0.13802069 | 0.00939505     | 0          |
| 0.199843   | 0.15901248 | 0.18596066 | 0.12173253 | 0              | 0.15671923 |
| 0.035461   | 0.09083368 | 0.15402528 | 0.02140316 | 0              | 2.96E-03   |
| 0.12267    | 0          | 0.2339688  | 0.18405183 |                | 0.02914188 |
| 0.189021   | 0.03314362 | 0.383122   | 0.06356775 |                | 0.16811909 |
| 0.163814   | 0.14232337 | 0.313533   | 0.14847693 |                | 0.072528   |
| 0.059151   | 0.18280298 | 0.180582   | 0.22566245 |                | 0.08535485 |
|            | 0.5        | 0.355315   | 0.08821223 |                | 0.02457061 |
|            | 0.333333   | 0.288053   | 0.050476   |                | 0.07968129 |
|            | 0.4        | 0.516214   | 0.213781   |                | 0.07655709 |
|            | 0.285714   | 0.231824   | 0.108173   |                | 0.0106843  |
|            | 0.25       |            | 0.049799   |                |            |
|            | 0.375      |            | 0.143213   |                |            |
|            | 0.25       |            | 0.143424   |                |            |
|            | 0.909091   |            | 0.046266   |                |            |
|            |            |            | 0.185823   |                |            |

**Figure 2C**

| SHAM       | MI         | MI+ARM036  | MI+S107    | MI+Propranolol | MI+SD208   |
|------------|------------|------------|------------|----------------|------------|
| 79.04759   | -17.543937 | 29.5129785 | 28.0899423 | 86.2068668     | 20.8791526 |
| 30.031022  | 23.8807223 | 39.495876  | 55.1601265 | 40.3227854     | 25.2668432 |
| 31.9034368 | 0          | 21.014435  | 68.0555146 | 24.2235177     | 9.03956039 |
| 42.97687   | 3.84607067 | 7.26246065 | 47.5285576 | 55.1866256     | 55.1724769 |
| 63.72824   | 10.0775299 | 25.6317781 | 51.9685589 | 62.7705778     | 76.2068988 |
| 65.80173   | 42.0494369 | 21.9047551 | 62.9167274 | 28.5714286     | -1.3953942 |
| 69.28571   | 27.6785734 | 20.0000339 | 22.1975883 | 58.3814311     | 42.2680572 |
| 33.77136   | 44.8087618 | -2.8984064 | 25.9447524 | 32.6530612     | 71.4285298 |
| 46.13982   | 40.9691087 | 3.48835267 | 65.4676505 | 26.8817204     | -12.635414 |
| 52.87958   | -4.0650407 | 7.77204085 | 54.8192671 | 50.9202454     | 59.1131916 |
| 35.37415   | -27.823691 | 28.1898956 | 83.8863076 |                | 30.0000625 |
| 25.92755   | 29.4797688 | 34.8571461 | 68.0672092 |                | 56.9619573 |
|            | 37.28223   | 3.4483617  | 28.4999366 |                | 15.2071265 |
|            | 15.51724   | 31.4775161 | 29         |                | 35.0516061 |
|            | 16.99077   | 6.007067   | 35.2       |                | 26.7658621 |
|            | 14.27481   | 17.31917   | 60         |                | 10.3448276 |
|            | 13.5689    | 9.107067   | 43.41085   |                | 77.8761062 |
|            | 0          | -5.307415  | 56.00371   |                |            |
|            | 19.8566    | 13.86053   | 20.25641   |                |            |
|            | 28.16901   | 23.84717   | 29.78157   |                |            |
|            | 11.30621   | 0          | 29.06158   |                |            |
|            |            | 15.60694   | 59.84203   |                |            |
|            |            | 9.915014   |            |                |            |

**Figure 2D**

|             | SHAM  |      |    | MI    |      |    | MI+ARM036 |       |    | MI+S107 |      |    | MI+Propranolol |       |    | MI+SD208 |       |    |
|-------------|-------|------|----|-------|------|----|-----------|-------|----|---------|------|----|----------------|-------|----|----------|-------|----|
|             | Mean  | SD   | N  | Mean  | SD   | N  | Mean      | SD    | N  | Mean    | SD   | N  | Mean           | SD    | N  | Mean     | SD    | N  |
| <b>Day1</b> | 47.16 | 9.42 | 22 | 44.95 | 7.51 | 20 | 48.47     | 9.72  | 19 | 49.52   | 6.57 | 19 | 44.23          | 10.98 | 14 | 43.44    | 14.32 | 19 |
| <b>Day2</b> | 33.45 | 7.23 | 22 | 40.68 | 8.68 | 20 | 37.5      | 7.28  | 19 | 31.57   | 4.38 | 19 | 27.14          | 11.48 | 14 | 26.39    | 12.16 | 19 |
| <b>Day3</b> | 27    | 8.04 | 22 | 31.75 | 8.31 | 20 | 31.95     | 10.64 | 19 | 21.95   | 4.17 | 19 | 24.92          | 12.22 | 14 | 24.38    | 11.71 | 19 |
| <b>Day4</b> | 21.09 | 8.08 | 22 | 30.31 | 6.7  | 20 | 29.44     | 14.43 | 19 | 20.55   | 7.76 | 19 | 17.91          | 11.69 | 14 | 15.57    | 13.97 | 19 |

**Figure 2E**

| <b>SHAM</b> | <b>MI</b> | <b>MI+ARM036</b> | <b>MI+S107</b> | <b>MI+Propranolol</b> | <b>MI+SD208</b> |
|-------------|-----------|------------------|----------------|-----------------------|-----------------|
| 34.2771     | 23.2268   | 12.415           | 18.975         | 20.5068               | 18.2624         |
| 37.5602     | 26.9121   | 14.6582          | 31.5596        | 38.6084               | 18.983          |
| 35.1638     | 27.7948   | 23.3892          | 38.7671        | 29.6332               | 24.4295         |
| 28.9961     | 13.9374   | 1.92229          | 24.59          | 21.8683               | 35.6431         |
| 35.4834     | 27.7913   | 19.7034          | 25.3823        | 28.9163               | 43.0129         |
| 38.769      | 20.3457   | 27.153           | 18.5028        | 19.4632               | 31.5596         |
| 29.7176     | 19.4628   | 8.08935          | 28.1162        | 24.9087               | 30.5989         |
| 14.6582     | 20.7457   | 13.7739          | 24.81          | 19.3844               | 14.417          |
| 21.7062     | 20.2641   | 28.516           | 25.81          | 16.0197               | 20.4248         |
| 6.88805     | 20.0249   | 9.76             | 18.74          | 34.4442               | 24.9097         |
| 16.5791     | 13.04     | 25.76            | 35.04          | 23.8659               | 40.3689         |
| 28.1101     | 21.12     | 11.37            | 20.6           | 22.08                 | 26.9129         |
| 24.3447     | 16.47     | 12.31            | 21.66          | 35.12                 | 23.1495         |
| 22.32       | 15.73     | 13.78            | 20.98          | 29.76                 | 32.7553         |
| 24.17       | 10.56     | 13.34            | 34.51          |                       | 22.1879         |
| 23.23       | 5         | 10               | 17.65          |                       | 27.12           |
| 23.71       | 9.6       | 18.31            |                |                       | 29.52           |
| 17.72       | 12.97     | 16.61            |                |                       |                 |
| 23.01       | 10.02     |                  |                |                       |                 |
| 23.9        | 11.46     |                  |                |                       |                 |
| 26.35       |           |                  |                |                       |                 |
| 21.99       |           |                  |                |                       |                 |

Figure 2F

| SHAM | MI | MI+ARM036 | MI+S107 | MI+Propranolol | MI+SD208 |
|------|----|-----------|---------|----------------|----------|
| 3    | 4  | 0         | 5       | 2              | 2        |
| 3    | 4  | 1         | 3       | 2              | 2        |
| 4    | 1  | 1         | 5       | 9              | 5        |
| 4    | 3  | 0         | 2       | 3              | 7        |
| 2    | 3  | 2         | 4       | 2              | 5        |
| 5    | 2  | 5         | 2       | 2              | 7        |
| 7    | 2  | 1         | 4       | 1              | 11       |
| 7    | 0  | 5         | 5       | 2              | 2        |
| 3    | 4  | 2         | 5       | 3              | 2        |
| 3    | 2  | 1         | 4       | 5              | 3        |
| 2    | 1  | 5         | 4       | 3              | 5        |
| 5    | 4  | 1         | 7       | 4              | 3        |
| 5    | 1  | 2         | 4       | 7              | 4        |
| 4    | 0  | 1         | 3       | 4              | 5        |
| 4    | 2  | 2         | 4       |                | 3        |
| 7    | 3  | 0         | 6       |                | 6        |
| 5    | 2  | 1         |         |                | 5        |
| 4    | 1  | 4         |         |                |          |
| 8    | 4  |           |         |                |          |
| 6    | 5  |           |         |                |          |
