# Supplementary material for: Heart failure-induced cognitive dysfunction is mediated by intracellular Ca2+ leak through ryanodine receptor type 2
Source: PubMed Central journal article supplement (PMC10400432; doi:10.1038/s41593-023-01377-6), 2023-07-10
Supplement: 41593_2023_1377_MOESM6_ESM.pdf [file 41593_2023_1377_MOESM6_ESM.pdf]

Figure 3B

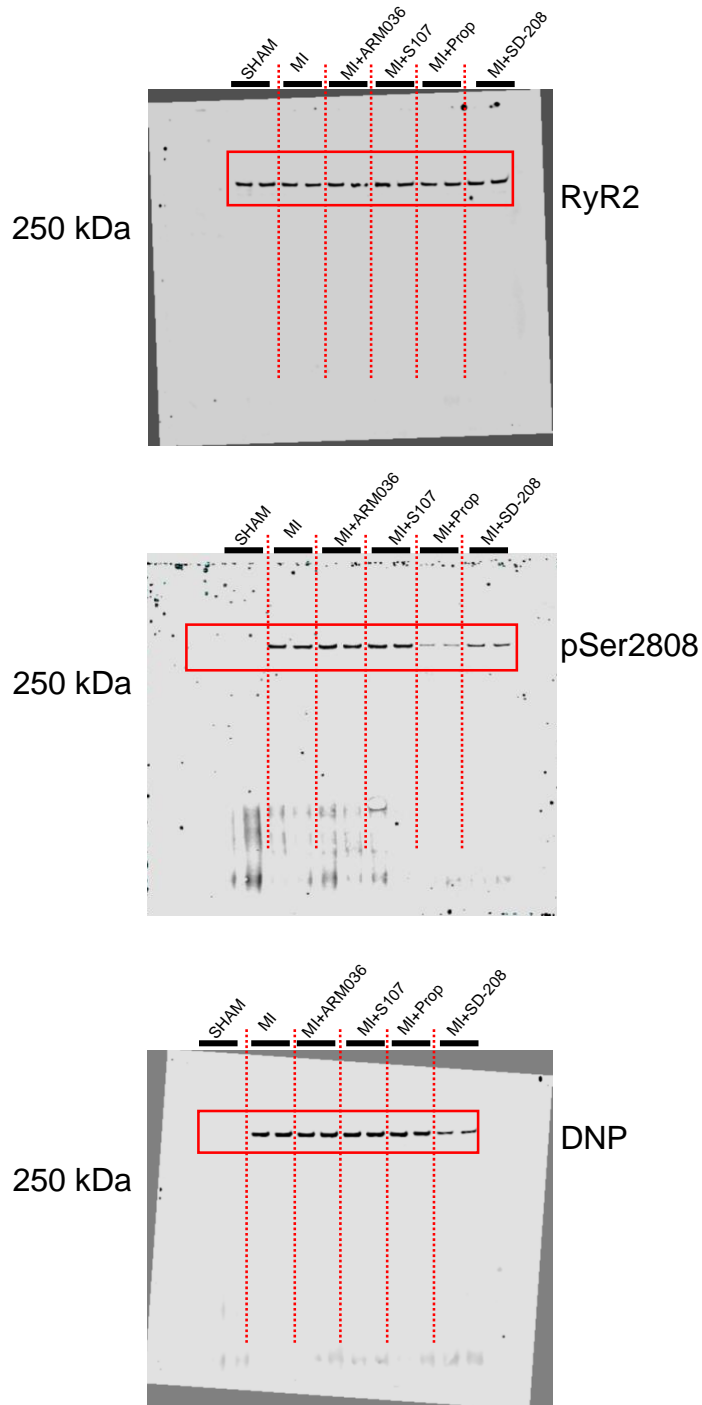

RyR2: IP- mouse tissues

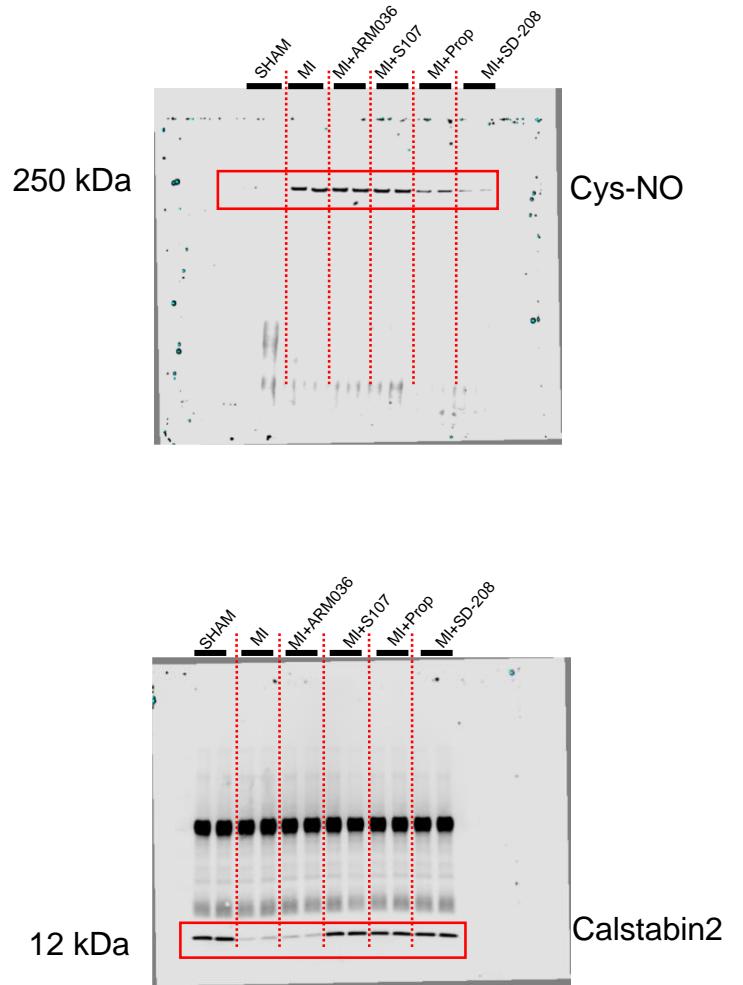

# RyR2: IP- mouse tissues

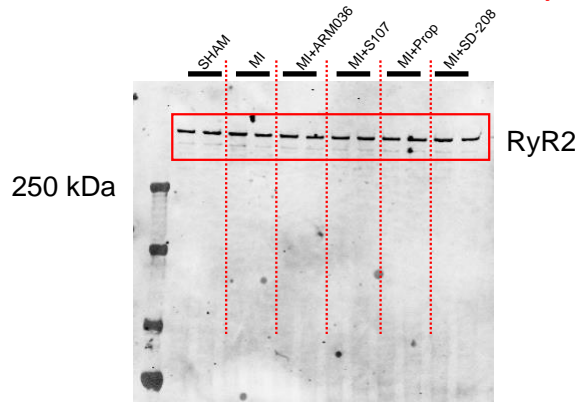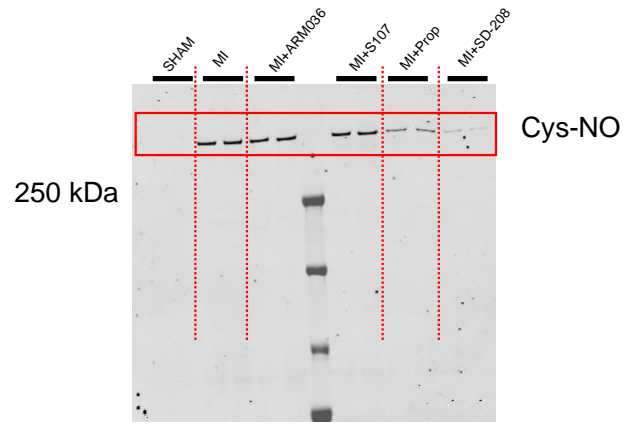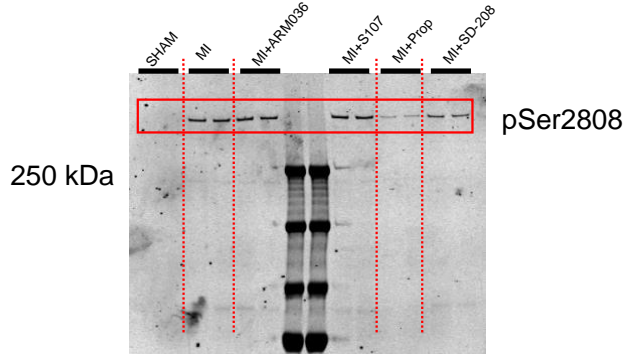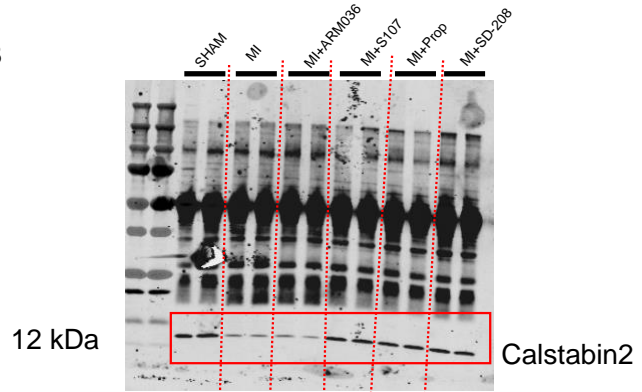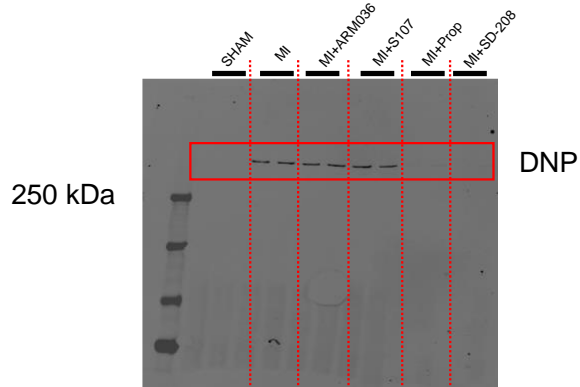

## RyR2: IP- mouse tissues

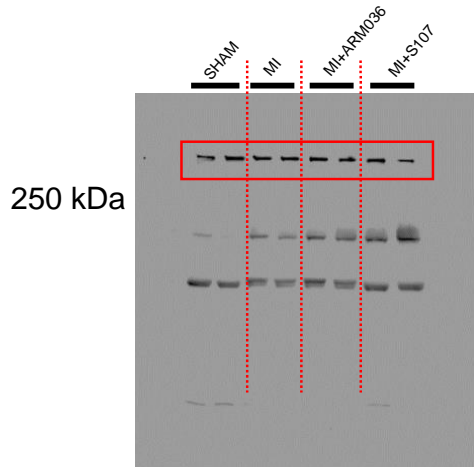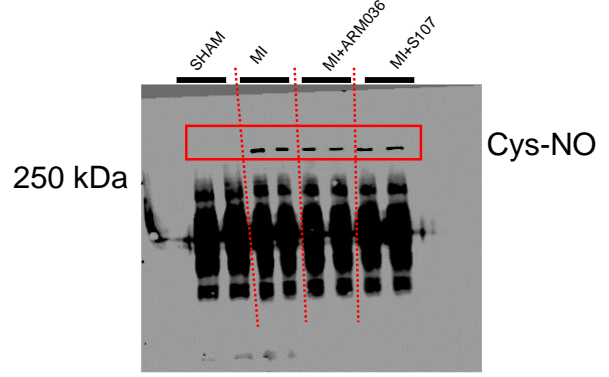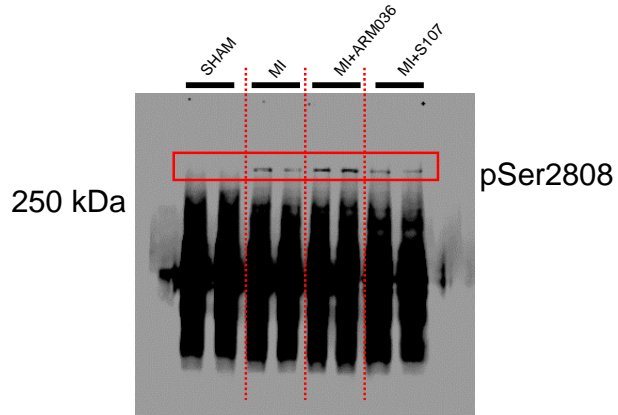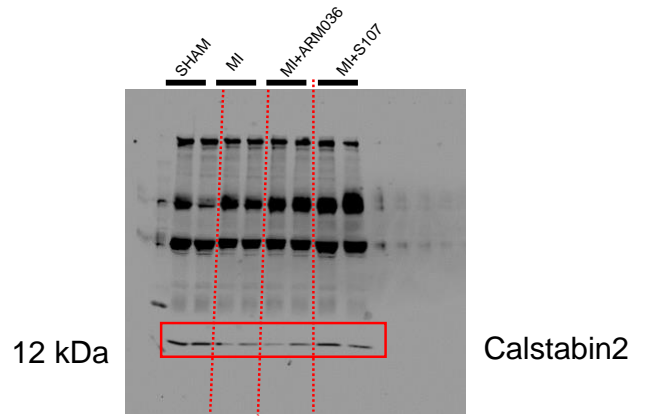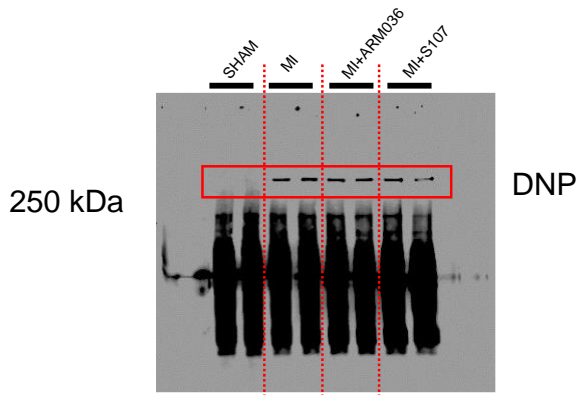

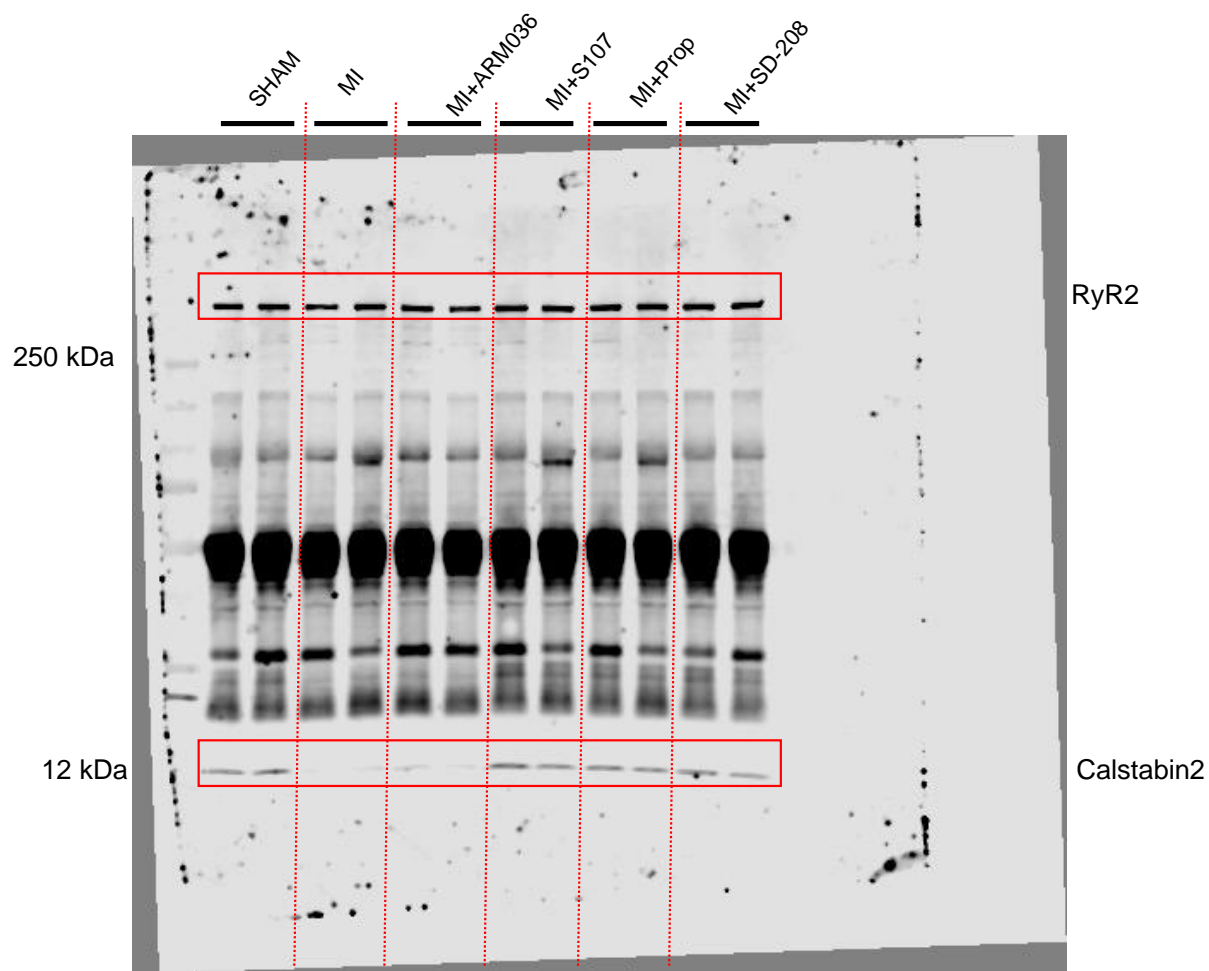

Loading Control gel showing even IgG and Total RyR2

**Figure 3C**

|           | pSer2808 | DNP  | Cys-NO | Calstabin2 |
|-----------|----------|------|--------|------------|
| SHAM      | 0.1      | 0.5  | 0.1    | 4.2        |
| SHAM      | 0.2      | 0.4  | 0.2    | 3.8        |
| SHAM      | 0.15     | 0.2  | 0.45   | 4.3        |
| SHAM      | 0.9      | 0.1  | 0.09   | 3.75       |
| SHAM      | 0.1      | 0    | 0.1    | 3.7        |
| SHAM      | 0.1      | 0.1  | 0.1    | 4          |
| MI        | 4.5      | 4.1  | 3.2    | 0.9        |
| MI        | 4.2      | 3.8  | 3.6    | 1.1        |
| MI        | 3.8      | 3.2  | 4.2    | 0.8        |
| MI        | 3.5      | 4    | 4      | 1.5        |
| MI        | 3.2      | 3.7  | 3.5    | 0.3        |
| MI        | 3.3      | 3.9  | 3.7    | 0.5        |
| MI+ARM036 | 4        | 4.5  | 3.85   | 0.85       |
| MI+ARM036 | 3.9      | 3.6  | 3.9    | 1          |
| MI+ARM036 | 3.7      | 3.7  | 3.7    | 1.3        |
| MI+ARM036 | 4.1      | 4    | 4.15   | 0.5        |
| MI+ARM036 | 3.8      | 3.8  | 3.8    | 0.5        |
| MI+ARM036 | 3.1      | 4    | 3.6    | 0.4        |
| MI+S107   | 4        | 3.9  | 4      | 4          |
| MI+S107   | 3.6      | 4.12 | 4.2    | 4.3        |
| MI+S107   | 3.55     | 4.3  | 3.8    | 3.6        |
| MI+S107   | 3.9      | 3.6  | 3.75   | 3.75       |
| MI+S107   | 3.22     | 3.9  | 3.7    | 3.6        |
| MI+S107   | 3        | 4    | 3.5    | 3.7        |
| MI+prop   | 0.8      | 3.8  | 1.1    | 3.6        |
| MI+prop   | 0.7      | 3.6  | 1.3    | 3.8        |
| MI+prop   | 0.6      | 4    | 0.9    | 3.9        |
| MI+prop   | 0.9      | 3.5  | 1.4    | 3.4        |
| MI+SD-208 | 1.6      | 1.8  | 0.5    | 4          |
| MI+SD-209 | 1.8      | 2    | 0.3    | 3.6        |
| MI+SD-210 | 1.8      | 2.2  | 0.4    | 3.7        |
| MI+SD-211 | 1.5      | 1.7  | 0.4    | 3.9        |

**Figure 3D-E**

Open probability

|      |    |          |         |         |           |
|------|----|----------|---------|---------|-----------|
| SHAM | MI | MI+ARM36 | MI+S107 | MI+Prop | MI+SD-208 |
|------|----|----------|---------|---------|-----------|

|         |         |         |         |         |         |
|---------|---------|---------|---------|---------|---------|
| 0.00882 | 0.01889 | 0.03875 | 0.00239 | 0.01433 | 0.05943 |
| 0.00068 | 0.22295 | 0.06897 | 0.0176  | 0.02337 | 0.02863 |
| 0.01    | 0.174   | 0.20064 | 0.00112 | 0.02199 | 0.0312  |
| 0.007   | 0.256   | 0.28667 | 0.02    | 0.0124  | 0.0401  |
| 0.013   | 0.211   | 0.26912 | 0.015   | 0.0193  | 0.0331  |
|         |         | 0.175   |         |         |         |
|         |         | 0.181   |         |         |         |

### Open time

| SHAM    | MI      | MI+ARM36 | MI+S107 | MI+Prop | MI+SD-208 |
|---------|---------|----------|---------|---------|-----------|
| 2.62276 | 7.52974 | 24.1606  | 3.38772 | 3.76655 | 7.0553    |
| 4.04    | 19.5887 | 18.3     | 2.75187 | 2.85528 | 8.21224   |
| 3.52    | 15.4    | 32.2072  | 4.3     | 5.0806  | 4.301     |
| 2.11    | 21.1    | 15.6     | 5.1     | 3.214   | 3.321     |
| 1.81    | 6.5     | 7.43365  |         | 2.874   | 3.847     |
| 4.12    |         | 8.9      |         |         |           |

### Close time

| SHAM    | MI      | MI+ARM36 | MI+S107 | MI+Prop | MI+SD-208 |
|---------|---------|----------|---------|---------|-----------|
| 167.665 | 105.746 | 31       | 1130.63 | 244.107 | 385.271   |
| 345     | 102.218 | 45       | 1657.6  | 214.33  | 226.639   |
| 673     | 67.3    | 121.45   | 521.2   | 210.559 | 123.562   |
| 542     | 31.6    | 18.5     | 415     | 98.9657 | 156.247   |
| 532     | 63.7    | 19.6775  | 321     | 186.3   | 87.34     |
| 1500    |         | 23.4     | 231     |         |           |

### Figure 3F-G

| SHAM   | MI     | MI+ARM36 | MI+S107 | MI+Prop | MI+SD-208 |
|--------|--------|----------|---------|---------|-----------|
| 11.825 | 46.141 | 42.437   | 18.951  | 31.421  | 28.009    |
| 18.126 | 51.729 | 49.393   | 17.162  | 28.073  | 29.55     |
| 9.761  | 44.873 | 44.329   | 25.599  | 27.282  | 29.748    |
| 12.825 | 45.141 | 43.437   | 19.951  |         |           |
| 17.126 | 50.729 | 42.394   | 16.162  |         |           |
| 10.761 | 43.873 | 41.329   | 22.069  |         |           |
