# Supplementary material for: Heart failure-induced cognitive dysfunction is mediated by intracellular Ca2+ leak through ryanodine receptor type 2
Source: PubMed Central journal article supplement (PMC10400432; doi:10.1038/s41593-023-01377-6), 2023-07-10
Supplement: 41593_2023_1377_MOESM7_ESM.pdf [file 41593_2023_1377_MOESM7_ESM.pdf]

**Figure 4B**

## SHAM

|         |         |         |         |         |         |         |         |         |         |         |         |         |
|---------|---------|---------|---------|---------|---------|---------|---------|---------|---------|---------|---------|---------|
| 101.074 | 100.662 | 105.179 | 95.5166 | 97.512  | 97.7974 | 95.9173 | 93.0537 | 100.134 | 108.379 | 91.3242 | 97.9943 | 100.694 |
| 108.398 | 99.2439 | 100.398 | 97.4659 | 98.7159 | 103.084 | 86.9251 | 107.471 | 92.1228 | 100.853 | 98.1735 | 92.8367 | 87.0865 |
| 96.6797 | 96.4083 | 119.522 | 109.162 | 95.1043 | 79.2952 | 83.9277 | 95.675  | 98.1308 | 88.8108 | 89.0411 | 99.7135 | 76.2007 |
| 102.539 | 94.9905 | 83.6653 | 81.8713 | 89.0851 | 92.511  | 98.9147 | 99.6068 | 86.1148 | 99.3477 | 95.8904 | 91.1175 | 78.9222 |
| 106.934 | 96.4083 | 95.6175 | 103.314 | 89.0851 | 97.7974 | 94.4186 | 98.2962 | 96.1282 | 99.3477 | 79.9087 | 108.309 | 114.301 |
| 120.117 | 96.4083 | 88.4462 | 109.162 | 90.2889 | 111.013 | 89.9225 | 115.334 | 100.134 | 102.358 | 95.8904 | 91.1175 | 100.694 |
| 105.469 | 106.333 | 76.494  | 103.314 | 102.327 | 87.2247 | 85.4264 | 99.6068 | 108.144 | 106.874 | 89.0411 | 92.8367 | 68.0364 |
| 102.539 | 97.8261 | 71.7131 | 101.365 | 97.512  | 103.084 | 100.413 | 106.16  | 114.152 | 93.3266 | 91.3242 | 92.8367 | 92.5295 |
| 95.2148 | 96.4083 | 98.008  | 99.4152 | 97.512  | 84.5815 | 85.4264 | 99.6068 | 100.134 | 103.864 | 118.721 | 115.186 | 106.869 |
| 120.117 | 99.2439 | 95.6175 | 97.4659 | 98.7159 | 108.37  | 91.4212 | 95.675  | 114.152 | 94.8319 | 107.306 | 104.871 | 92.5295 |
| 106.934 | 96.4083 | 114.741 | 109.162 | 108.347 | 97.7974 | 97.416  | 93.0537 | 108.144 | 103.864 | 86.758  | 89.3983 | 100.694 |
| 106.934 | 97.8261 | 112.351 | 93.5672 | 102.327 | 124.229 | 97.416  | 100.917 | 102.136 | 99.3477 | 91.3242 | 91.1175 | 84.3651 |
| 102.539 | 102.079 | 78.8845 | 89.6686 | 107.143 | 103.084 | 101.912 | 95.675  | 128.171 | 94.8319 | 86.758  | 80.8023 | 76.2007 |
| 106.934 | 100.662 | 88.4462 | 120.858 | 96.3082 | 92.511  | 103.411 | 98.2962 | 102.136 | 102.358 | 100.457 | 96.2751 | 89.808  |
| 95.2148 | 94.9905 | 112.351 | 107.212 | 97.512  | 68.7225 | 107.907 | 102.228 | 102.136 | 93.3266 | 111.872 | 104.871 | 122.465 |
| 92.2852 | 97.8261 | 100.398 | 89.6686 | 107.143 | 113.656 | 95.9173 | 98.2962 | 98.1308 | 99.3477 | 91.3242 | 99.7135 | 97.9724 |
| 83.4961 | 103.497 | 98.008  | 93.5672 | 111.958 | 113.656 | 110.904 | 93.0537 | 106.142 | 97.8424 | 98.1735 | 101.433 | 92.5295 |
| 89.3555 | 96.4083 | 119.522 | 115.01  | 98.7159 | 100.441 | 107.907 | 98.2962 | 110.147 | 102.358 | 102.74  | 104.871 | 78.9222 |
| 106.934 | 94.9905 | 93.2271 | 105.263 | 102.327 | 108.37  | 115.401 | 94.3643 | 108.144 | 100.853 | 107.306 | 97.9943 | 109.609 |
| 108.398 | 99.2439 | 112.351 | 101.365 | 103.531 | 95.1542 | 104.91  | 99.6068 | 108.144 | 96.3372 | 100.457 | 113.467 | 114.301 |
| 86.4258 | 106.333 | 114.741 | 115.01  | 104.735 | 87.2247 | 101.912 | 102.228 | 96.1282 | 108.379 | 116.438 | 101.433 | 109.609 |
| 95.2148 | 99.2439 | 112.351 | 93.5672 | 93.9005 | 108.37  | 101.912 | 94.3643 | 88.1175 | 93.3266 | 109.589 | 99.7135 | 95.9078 |
| 89.3555 | 99.2439 | 83.6653 | 89.6686 | 101.124 | 124.229 | 110.904 | 93.0537 | 100.134 | 94.8319 | 102.74  | 108.309 | 112.349 |
| 84.9609 | 96.4083 | 98.008  | 77.9727 | 110.754 | 116.3   | 106.408 | 108.781 | 68.0908 | 93.3266 | 116.438 | 104.871 | 101.388 |
| 95.2148 | 102.079 | 88.4462 | 77.9727 | 110.754 | 103.084 | 118.398 | 98.2962 | 84.1121 | 100.853 | 91.3242 | 97.9943 | 112.349 |
| 96.6797 | 110.586 | 114.741 | 105.263 | 107.143 | 89.8678 | 94.4186 | 94.3643 | 90.1202 | 99.3477 | 105.023 | 104.871 | 106.869 |
| 96.6797 | 99.2439 | 107.57  | 97.4659 | 96.3082 | 97.7974 | 97.416  | 100.917 | 90.1202 | 103.864 | 105.023 | 99.7135 | 109.609 |
| 109.863 | 100.662 | 90.8367 | 107.212 | 96.3082 | 92.511  | 109.406 | 102.228 | 114.152 | 118.916 | 105.023 | 101.433 | 106.869 |
| 98.1445 | 109.168 | 121.912 | 97.4659 | 85.4735 | 105.727 | 95.9173 | 100.917 | 84.1121 | 94.8319 | 111.872 | 99.7135 | 109.609 |
| 89.3555 | 109.168 | 102.789 | 115.01  | 102.327 | 92.511  | 103.411 | 120.577 | 102.136 | 103.864 | 102.74  | 115.186 | 150.712 |
| 213.867 | 165.879 | 302.494 | 290.058 | 190.209 | 177.093 | 231.507 | 184.797 | 214.286 | 197.19  | 181.849 | 225.215 | 315.126 |

|         |         |         |         |         |         |         |         |         |         |         |         |         |
|---------|---------|---------|---------|---------|---------|---------|---------|---------|---------|---------|---------|---------|
| 208.008 | 174.386 | 258.935 | 276.522 | 195.024 | 177.093 | 226.968 | 196.592 | 200.267 | 176.116 | 171.233 | 220.057 | 337.46  |
| 203.613 | 175.803 | 241.995 | 266.854 | 180.578 | 161.233 | 210.323 | 183.486 | 194.259 | 185.148 | 178.082 | 214.9   | 307.524 |
| 206.543 | 174.386 | 246.835 | 241.715 | 174.559 | 177.093 | 210.323 | 193.971 | 186.248 | 182.137 | 196.347 | 223.496 | 345.625 |
| 206.543 | 171.55  | 225.055 | 247.517 | 185.393 | 169.163 | 196.705 | 187.418 | 188.251 | 185.148 | 191.781 | 228.653 | 326.575 |
| 199.219 | 185.728 | 232.315 | 239.782 | 174.559 | 153.304 | 205.784 | 180.865 | 192.256 | 191.169 | 189.498 | 228.653 | 307.524 |
| 194.824 | 177.221 | 232.315 | 262.986 | 178.17  | 185.022 | 205.784 | 195.282 | 198.264 | 192.674 | 173.516 | 209.742 | 351.068 |
| 210.937 | 171.55  | 229.895 | 280.39  | 181.782 | 166.52  | 214.863 | 184.797 | 170.227 | 185.148 | 191.781 | 220.057 | 345.625 |
| 200.684 | 167.297 | 212.956 | 259.119 | 167.335 | 171.806 | 222.428 | 201.835 | 192.256 | 195.685 | 182.648 | 208.023 | 318.41  |
| 199.219 | 168.715 | 239.575 | 261.053 | 175.762 | 148.018 | 214.863 | 196.592 | 186.248 | 180.632 | 196.347 | 233.811 | 323.853 |
| 206.893 | 170.132 | 241.995 | 247.517 | 175.762 | 177.093 | 214.863 | 201.835 | 194.259 | 192.674 | 203.196 | 242.407 | 332.017 |
| 206.893 | 170.132 | 249.255 | 255.251 | 161.316 | 153.304 | 216.376 | 203.145 | 192.256 | 192.674 | 203.196 | 232.092 | 323.853 |
| 221.671 | 167.297 | 232.315 | 245.583 | 181.782 | 155.947 | 220.915 | 197.903 | 190.254 | 194.18  | 191.781 | 233.811 | 318.41  |
| 203.937 | 167.297 | 239.575 | 247.517 | 172.151 | 177.093 | 222.428 | 196.592 | 174.232 | 195.685 | 196.347 | 233.811 | 310.246 |
| 202.46  | 158.79  | 263.775 | 239.782 | 170.947 | 174.449 | 210.323 | 195.282 | 188.251 | 197.19  | 196.347 | 233.811 | 280.31  |
| 193.593 | 170.132 | 229.895 | 253.318 | 175.762 | 163.877 | 207.297 | 195.282 | 170.227 | 179.127 | 200.913 | 228.653 | 293.917 |
| 212.804 | 157.372 | 176.656 | 230.113 | 179.374 | 171.806 | 204.271 | 207.077 | 188.251 | 195.685 | 191.781 | 237.249 | 304.803 |
| 184.726 | 154.537 | 237.155 | 237.848 | 173.355 | 171.806 | 208.81  | 204.456 | 190.254 | 197.19  | 198.63  | 244.126 | 321.132 |
| 202.46  | 146.03  | 237.155 | 224.312 | 167.335 | 171.806 | 213.35  | 211.009 | 202.27  | 200.201 | 210.046 | 237.249 | 299.36  |
| 190.637 | 158.79  | 222.635 | 224.312 | 172.151 | 179.736 | 205.784 | 195.282 | 204.272 | 197.19  | 200.913 | 244.126 | 342.903 |
| 195.071 | 160.208 | 234.735 | 208.842 | 174.559 | 163.877 | 222.428 | 200.524 | 198.264 | 194.18  | 207.763 | 247.564 | 348.346 |
| 187.681 | 148.866 | 263.775 | 222.222 | 174.559 | 158.59  | 210.323 | 214.941 | 186.248 | 203.211 | 184.932 | 238.968 | 332.017 |
| 172.903 | 155.955 | 241.995 | 204.678 | 162.52  | 163.877 | 207.297 | 200.524 | 198.264 | 207.727 | 194.064 | 251.003 | 348.346 |
| 180.292 | 147.448 | 241.995 | 231.969 | 155.297 | 155.947 | 213.35  | 200.524 | 198.264 | 201.706 | 205.479 | 237.249 | 307.524 |
| 164.037 | 151.701 | 261.355 | 233.918 | 154.093 | 195.595 | 199.732 | 207.077 | 198.264 | 200.201 | 191.781 | 256.16  | 337.46  |
| 159.603 | 150.284 | 268.614 | 218.324 | 157.705 | 166.52  | 210.323 | 199.214 | 194.259 | 216.759 | 198.63  | 252.722 | 323.853 |
| 161.081 | 147.448 | 249.255 | 245.614 | 160.112 | 177.093 | 211.837 | 213.63  | 218.291 | 201.706 | 203.196 | 240.688 | 337.46  |
| 162.598 | 154.537 | 271.034 | 218.324 | 162.52  | 161.233 | 214.863 | 211.009 | 188.251 | 192.674 | 191.781 | 247.564 | 356.511 |
| 184.57  | 144.612 | 295.234 | 226.121 | 158.909 | 153.304 | 220.915 | 211.009 | 190.254 | 212.243 | 191.781 | 249.284 | 340.182 |

|         |         |         |         |         |         |         |         |         |         |         |         |         |
|---------|---------|---------|---------|---------|---------|---------|---------|---------|---------|---------|---------|---------|
| 181.641 | 144.612 | 273.454 | 204.678 | 168.539 | 177.093 | 213.35  | 213.63  | 192.256 | 206.222 | 194.064 | 254.441 | 337.46  |
| 172.852 | 144.612 | 241.995 | 206.908 | 160.112 | 169.163 | 216.376 | 211.009 | 188.251 | 212.243 | 198.63  | 254.441 | 323.853 |
| 181.641 | 140.359 | 227.475 | 199.173 | 155.297 | 177.093 | 220.915 | 208.388 | 192.256 | 207.727 | 194.064 | 238.968 | 334.739 |
| 183.105 | 146.03  | 227.475 | 183.704 | 151.685 | 187.665 | 226.968 | 207.077 | 188.251 | 192.674 | 198.63  | 263.037 | 312.967 |
| 169.922 | 144.612 | 234.735 | 183.704 | 143.258 | 171.806 | 217.889 | 218.873 | 174.232 | 200.201 | 210.046 | 273.352 | 299.36  |
| 159.668 | 143.195 | 198.436 | 218.324 | 146.87  | 163.877 | 222.428 | 213.63  | 192.256 | 204.717 | 203.196 | 263.037 | 323.853 |
| 153.809 | 153.119 | 254.095 | 233.918 | 154.093 | 174.449 | 210.323 | 220.183 | 176.235 | 204.717 | 212.329 | 261.318 | 323.853 |
| 172.852 | 148.866 | 251.675 | 228.07  | 154.093 | 158.59  | 225.455 | 207.077 | 176.235 | 203.211 | 196.347 | 273.352 | 342.903 |
| 158.203 | 148.866 | 254.095 | 212.476 | 143.258 | 169.163 | 213.35  | 207.077 | 176.235 | 204.717 | 210.046 | 268.195 | 351.068 |
| 158.203 | 154.537 | 188.756 | 218.324 | 148.074 | 153.304 | 222.428 | 226.737 | 178.238 | 198.695 | 207.763 | 264.756 | 342.903 |
| 177.246 | 143.195 | 229.895 | 218.324 | 151.685 | 163.877 | 210.323 | 225.426 | 176.235 | 204.717 | 189.498 | 273.352 | 329.296 |
| 155.273 | 140.359 | 210.359 | 224.172 | 145.666 | 179.736 | 210.323 | 222.805 | 192.256 | 203.211 | 200.913 | 292.264 | 345.625 |
| 153.809 | 141.777 | 234.263 | 212.476 | 137.239 | 158.59  | 217.889 | 217.562 | 174.232 | 203.211 | 210.046 | 264.756 | 353.789 |
| 153.809 | 138.941 | 215.139 | 228.07  | 145.666 | 195.595 | 220.915 | 211.009 | 178.238 | 201.706 | 191.781 | 285.387 | 337.46  |
| 147.949 | 153.534 | 234.263 | 224.172 | 154.093 | 161.233 | 222.428 | 209.699 | 176.235 | 198.695 | 194.064 | 271.633 | 361.953 |
| 156.738 | 145.235 | 222.311 | 228.07  | 139.647 | 163.877 | 216.376 | 196.592 | 188.251 | 210.738 | 205.479 | 290.544 | 326.575 |
| 158.203 | 152.151 | 203.187 | 224.172 | 140.851 | 150.661 | 204.271 | 204.456 | 170.227 | 200.201 | 203.196 | 276.791 | 332.017 |
| 162.598 | 141.085 | 239.044 | 212.476 | 158.909 | 163.877 | 207.297 | 199.214 | 166.222 | 201.706 | 203.196 | 261.318 | 337.46  |
| 168.457 | 152.151 | 262.948 | 230.019 | 142.055 | 177.093 | 205.784 | 203.145 | 182.243 | 201.706 | 191.781 | 283.668 | 342.903 |
| 171.387 | 150.768 | 258.167 | 210.526 | 140.851 | 187.665 | 204.271 | 203.145 | 182.243 | 197.19  | 203.196 | 273.352 | 340.182 |
| 149.414 | 153.534 | 262.948 | 210.526 | 145.666 | 161.233 | 195.192 | 208.388 | 180.24  | 198.695 | 198.63  | 268.195 | 334.739 |
| 152.344 | 146.618 | 262.948 | 226.121 | 142.055 | 185.022 | 205.784 | 207.077 | 178.238 | 180.632 | 194.064 | 256.16  | 334.739 |
| 156.738 | 150.768 | 272.51  | 239.766 | 137.239 | 171.806 | 198.219 | 213.63  | 172.23  | 198.695 | 189.498 | 266.476 | 299.36  |
| 143.555 | 143.852 | 272.51  | 228.07  | 146.87  | 166.52  | 210.323 | 217.562 | 174.232 | 183.643 | 196.347 | 283.668 | 299.36  |
| 140.625 | 152.151 | 217.53  | 235.867 | 143.258 | 161.233 | 208.81  | 195.282 | 172.23  | 195.685 | 198.63  | 271.633 | 291.196 |
| 133.301 | 136.936 | 217.53  | 226.121 | 131.22  | 140.088 | 211.837 | 197.903 | 176.235 | 188.159 | 200.913 | 273.352 | 315.689 |
| 146.484 | 146.618 | 217.53  | 228.07  | 143.258 | 155.947 | 216.376 | 217.562 | 182.243 | 194.18  | 207.763 | 280.229 | 323.853 |
| 152.344 | 132.786 | 229.482 | 247.563 | 139.647 | 158.59  | 210.323 | 199.214 | 174.232 | 213.748 | 207.763 | 275.072 | 321.132 |

|         |         |         |         |         |         |         |         |         |         |         |         |         |
|---------|---------|---------|---------|---------|---------|---------|---------|---------|---------|---------|---------|---------|
| 156.738 | 131.403 | 239.044 | 247.563 | 150.482 | 142.731 | 199.732 | 200.524 | 170.227 | 201.706 | 207.763 | 280.229 | 326.575 |
| 156.738 | 142.469 | 243.825 | 235.867 | 144.462 | 155.947 | 202.758 | 218.873 | 192.256 | 201.706 | 203.196 | 276.791 | 299.36  |
| 172.852 | 130.02  | 227.092 | 237.817 | 143.258 | 140.088 | 205.784 | 200.524 | 180.24  | 185.148 | 205.479 | 273.352 | 302.081 |
| 168.457 | 141.085 | 239.044 | 237.817 | 132.424 | 158.59  | 198.219 | 214.941 | 186.248 | 197.19  | 205.479 | 292.264 | 258.538 |
| 177.246 | 145.235 | 227.092 | 224.172 | 139.647 | 171.806 | 198.219 | 214.941 | 180.24  | 210.738 | 214.612 | 288.825 | 356.511 |
| 174.316 | 145.235 | 227.092 | 239.766 | 148.074 | 155.947 | 216.376 | 207.077 | 196.262 | 192.674 | 221.461 | 288.825 | 318.41  |
| 174.316 | 148.001 | 231.873 | 226.121 | 128.812 | 150.661 | 198.219 | 216.252 | 200.267 | 195.685 | 212.329 | 285.387 | 302.081 |
| 175.781 | 139.702 | 243.825 | 226.121 | 139.647 | 150.661 | 213.35  | 196.592 | 188.251 | 201.706 | 200.913 | 283.668 | 247.652 |
| 166.992 | 128.637 | 227.092 | 231.969 | 139.647 | 153.304 | 199.732 | 213.63  | 184.246 | 203.211 | 207.763 | 281.948 | 254.841 |
| 177.246 | 136.936 | 265.339 | 210.526 | 140.851 | 142.731 | 196.705 | 221.494 | 178.238 | 189.664 | 203.196 | 261.318 | 238.399 |
| 177.246 | 139.702 | 253.386 | 230.019 | 143.258 | 155.947 | 204.271 | 209.699 | 194.259 | 204.717 | 212.329 | 278.51  | 235.659 |
| 174.316 | 138.319 | 253.386 | 231.969 | 134.831 | 153.304 | 190.653 | 226.737 | 174.232 | 185.148 | 196.347 | 287.106 | 232.919 |
| 169.922 | 138.319 | 241.434 | 196.881 | 134.831 | 150.661 | 199.732 | 201.835 | 190.254 | 197.19  | 194.064 | 285.387 | 241.14  |
| 168.457 | 131.403 | 241.434 | 206.628 | 122.793 | 171.806 | 211.837 | 216.252 | 184.246 | 201.706 | 200.913 | 293.983 | 197.296 |
| 168.457 | 130.02  | 250.996 | 239.766 | 140.851 | 187.665 | 201.245 | 216.252 | 176.235 | 192.674 | 187.215 | 287.106 | 216.478 |
| 164.062 | 120.337 | 222.311 | 204.678 | 133.628 | 177.093 | 213.35  | 211.009 | 190.254 | 177.622 | 191.781 | 287.106 | 235.659 |
| 177.246 | 128.637 | 236.653 | 247.563 | 143.258 | 153.304 | 199.732 | 212.32  | 176.235 | 180.632 | 205.479 | 283.668 | 257.581 |
| 183.105 | 121.721 | 236.653 | 224.172 | 126.404 | 163.877 | 205.784 | 213.63  | 164.219 | 177.622 | 187.215 | 293.983 | 213.737 |
| 174.316 | 114.805 | 234.263 | 228.07  | 131.22  | 140.088 | 211.837 | 212.32  | 168.224 | 186.653 | 196.347 | 287.106 | 183.595 |
| 165.527 | 114.805 | 227.092 | 196.881 | 130.016 | 124.229 | 207.297 | 220.183 | 180.24  | 188.159 | 200.913 | 297.421 | 208.257 |
| 187.5   | 118.954 | 215.139 | 231.969 | 137.239 | 132.159 | 196.705 | 224.115 | 170.227 | 197.19  | 203.196 | 288.825 | 197.296 |
| 178.711 | 130.02  | 231.873 | 233.918 | 136.035 | 134.802 | 201.245 | 213.63  | 180.24  | 189.664 | 200.913 | 281.948 | 205.517 |
| 183.105 | 136.936 | 231.873 | 239.766 | 133.628 | 155.947 | 201.245 | 216.252 | 200.267 | 168.59  | 198.63  | 290.544 | 224.698 |
| 190.43  | 121.721 | 210.359 | 247.563 | 132.424 | 148.018 | 207.297 | 216.252 | 172.23  | 174.611 | 198.63  | 306.017 | 205.517 |
| 188.965 | 127.253 | 222.311 | 237.817 | 131.22  | 153.304 | 205.784 | 220.183 | 164.219 | 183.643 | 205.479 | 314.613 | 227.439 |
| 181.641 | 135.553 | 217.53  | 249.513 | 139.647 | 140.088 | 201.245 | 216.252 | 194.259 | 183.643 | 214.612 | 302.579 | 246.62  |
| 203.613 | 134.169 | 188.845 | 239.766 | 136.035 | 150.661 | 207.297 | 225.426 | 180.24  | 201.706 | 203.196 | 309.456 | 205.517 |
| 193.359 | 131.403 | 198.406 | 243.665 | 139.647 | 155.947 | 201.245 | 208.388 | 178.238 | 201.706 | 207.763 | 302.579 | 227.439 |

|         |         |         |         |         |         |         |         |         |         |         |         |         |
|---------|---------|---------|---------|---------|---------|---------|---------|---------|---------|---------|---------|---------|
| 180.176 | 120.337 | 162.55  | 239.766 | 140.851 | 163.877 | 204.271 | 216.252 | 176.235 | 194.18  | 200.913 | 309.456 | 274.022 |
| 180.176 | 128.637 | 157.769 | 239.766 | 144.462 | 150.661 | 199.732 | 216.252 | 168.224 | 198.695 | 205.479 | 297.421 | 252.101 |
| 202.148 | 130.02  | 154.877 | 226.121 | 143.258 | 137.445 | 198.219 | 224.115 | 176.235 | 207.727 | 203.196 | 300.86  | 257.581 |
| 159.668 | 128.637 | 162.137 | 239.766 | 134.831 | 140.088 | 208.81  | 224.115 | 176.235 | 222.78  | 207.763 | 328.367 | 263.061 |
| 158.203 | 134.169 | 174.236 | 216.374 | 145.666 | 129.515 | 207.297 | 233.29  | 174.232 | 206.222 | 223.744 | 314.613 | 268.542 |
| 184.57  | 130.02  | 164.94  | 239.766 | 136.035 | 142.731 | 216.376 | 226.737 | 164.219 | 204.717 | 205.479 | 300.86  | 309.645 |
| 164.062 | 121.721 | 191.235 | 208.577 | 139.647 | 166.52  | 192.166 | 234.6   | 156.208 | 194.18  | 200.913 | 316.332 | 326.575 |
| 153.809 | 123.104 | 129.084 | 243.665 | 136.035 | 132.159 | 201.245 | 220.183 | 166.222 | 207.727 | 210.046 | 300.86  | 332.017 |
| 153.809 | 131.403 | 124.303 | 239.766 | 143.258 | 113.656 | 225.455 | 214.941 | 168.224 | 218.264 | 214.612 | 321.49  | 304.803 |
| 180.176 | 124.487 | 145.817 | 239.766 | 140.851 | 137.445 | 223.942 | 225.426 | 178.238 | 198.695 | 210.046 | 311.175 | 318.41  |
| 180.176 | 132.786 | 112.351 | 230.019 | 136.035 | 145.374 | 222.428 | 226.737 | 166.222 | 212.243 | 216.895 | 314.613 | 310.246 |
| 171.387 | 130.02  | 129.084 | 245.614 | 140.851 | 148.018 | 228.481 | 218.873 | 172.23  | 197.19  | 212.329 | 300.86  | 332.017 |
| 191.895 | 124.487 | 150.598 | 241.715 | 133.628 | 145.374 | 214.863 | 213.63  | 176.235 | 206.222 | 205.479 | 338.682 | 356.511 |
| 174.316 | 124.487 | 145.817 | 228.07  | 136.035 | 126.872 | 208.81  | 233.29  | 164.219 | 191.169 | 237.443 | 314.613 | 351.068 |
| 188.965 | 124.487 | 169.721 | 263.158 | 126.404 | 124.229 | 213.35  | 220.183 | 160.214 | 198.695 | 210.046 | 318.052 | 367.396 |
| 171.387 | 134.169 | 160.159 | 243.665 | 131.22  | 137.445 | 234.533 | 228.047 | 180.24  | 192.674 | 216.895 | 328.367 | 342.903 |
| 175.781 | 130.02  | 129.084 | 214.425 | 133.628 | 134.802 | 217.889 | 166.448 | 180.24  | 206.222 | 216.895 | 335.244 | 353.789 |
| 172.852 | 130.02  | 160.159 | 230.019 | 133.628 | 150.661 | 217.889 | 169.069 | 168.224 | 197.19  | 207.763 | 321.49  | 334.739 |
| 174.316 | 131.403 | 143.426 | 237.817 | 130.016 | 153.304 | 214.863 | 176.933 | 168.224 | 201.706 | 216.895 | 319.771 | 353.789 |
| 166.992 | 141.085 | 143.426 | 243.665 | 133.628 | 140.088 | 229.994 | 170.38  | 194.259 | 206.222 | 219.178 | 304.298 | 323.853 |
| 181.641 | 130.02  | 138.645 | 255.361 | 137.239 | 134.802 | 219.402 | 183.486 | 174.232 | 195.685 | 210.046 | 312.894 | 348.346 |
| 175.781 | 135.553 | 162.55  | 249.513 | 131.22  | 137.445 | 208.81  | 186.107 | 184.246 | 194.18  | 212.329 | 309.456 | 383.725 |
| 175.781 | 124.487 | 145.817 | 265.107 | 131.22  | 124.229 | 189.14  | 184.797 | 182.243 | 200.201 | 210.046 | 297.421 | 356.511 |
| 155.273 | 130.02  | 152.988 | 274.854 | 142.055 | 140.088 | 216.376 | 176.933 | 182.243 | 188.159 | 194.064 | 319.771 | 372.839 |
| 153.809 | 131.403 | 141.036 | 288.499 | 116.774 | 132.159 | 216.376 | 192.661 | 174.232 | 201.706 | 214.612 | 318.052 | 391.889 |
| 164.062 | 136.936 | 155.378 | 253.411 | 125.201 | 140.088 | 216.376 | 187.418 | 166.222 | 203.211 | 207.763 | 306.017 | 353.789 |
| 171.387 | 131.403 | 141.036 | 280.702 | 126.404 | 142.731 | 214.863 | 178.244 | 166.222 | 194.18  | 207.763 | 278.51  | 348.346 |
| 159.668 | 130.02  | 148.207 | 269.006 | 127.608 | 145.374 | 207.297 | 178.244 | 162.216 | 192.674 | 216.895 | 319.771 | 307.524 |

|         |         |         |         |         |         |         |         |         |         |         |         |         |
|---------|---------|---------|---------|---------|---------|---------|---------|---------|---------|---------|---------|---------|
| 165.527 | 131.403 | 152.988 | 255.361 | 117.978 | 126.872 | 228.481 | 183.486 | 174.232 | 200.201 | 212.329 | 314.613 | 353.789 |
| 165.527 | 138.319 | 131.474 | 267.057 | 130.016 | 145.374 | 228.481 | 190.039 | 166.222 | 197.19  | 203.196 | 330.086 | 353.789 |
| 171.387 | 136.936 | 155.378 | 241.715 | 121.589 | 161.233 | 220.915 | 184.797 | 182.243 | 200.201 | 205.479 | 323.209 | 367.396 |
| 161.133 | 139.702 | 133.865 | 224.172 | 123.997 | 148.018 | 222.428 | 184.797 | 166.222 | 186.653 | 207.763 | 340.401 | 340.182 |
| 164.062 | 141.085 | 176.892 | 245.614 | 122.793 | 126.872 | 217.889 | 197.903 | 168.224 | 198.695 | 207.763 | 309.456 | 351.068 |
| 174.316 | 131.403 | 164.94  | 245.614 | 115.57  | 137.445 | 239.073 | 190.039 | 172.23  | 180.632 | 210.046 | 326.648 | 342.903 |
| 180.176 | 130.02  | 179.283 | 255.361 | 117.978 | 142.731 | 225.455 | 197.903 | 168.224 | 177.622 | 210.046 | 314.613 | 342.903 |

**MI**

|         |         |         |         |         |         |         |         |         |            |         |            |
|---------|---------|---------|---------|---------|---------|---------|---------|---------|------------|---------|------------|
| 101.513 | 89.4071 | 89.4495 | 91.0931 | 86.5633 | 105.672 | 96.0803 | 89.1089 | 96.3232 | 93.2835827 | 92.5778 | 98.7078926 |
| 99.1242 | 93.9921 | 90.3096 | 90.2256 | 103.359 | 98.8106 | 93.2122 | 107.673 | 99.4303 | 89.5522376 | 93.3759 | 95.8467912 |
| 94.3471 | 89.4071 | 98.0505 | 100.636 | 91.7313 | 93.3211 | 100.382 | 107.673 | 90.1088 | 104.477607 | 90.1836 | 107.291185 |
| 99.1242 | 96.2846 | 100.631 | 95.4309 | 117.571 | 103.614 | 96.0803 | 100.248 | 108.752 | 93.2835827 | 104.549 | 95.8467912 |
| 90.7643 | 103.162 | 96.3303 | 104.974 | 98.1912 | 100.183 | 98.9484 | 89.1089 | 91.6623 | 117.537312 | 101.357 | 94.4162435 |
| 100.318 | 98.5771 | 92.8899 | 99.7687 | 87.8553 | 87.8317 | 110.421 | 103.96  | 100.984 | 106.343282 | 93.3759 | 101.568994 |
| 102.707 | 84.8221 | 96.3303 | 97.166  | 111.111 | 102.928 | 93.2122 | 85.396  | 87.0016 | 97.0149278 | 97.3663 | 101.568994 |
| 91.9586 | 96.2846 | 103.211 | 98.0335 | 105.943 | 97.4382 | 103.25  | 85.396  | 85.448  | 97.0149278 | 97.3663 | 115.874483 |
| 99.1242 | 112.332 | 102.351 | 95.4309 | 105.943 | 98.1244 | 98.9484 | 111.386 | 114.966 | 100.746267 | 95.7702 | 101.568994 |
| 94.3471 | 93.9921 | 106.651 | 98.0335 | 94.3152 | 85.0869 | 96.0803 | 96.5347 | 107.198 | 97.0149278 | 102.953 | 87.2634991 |
| 101.513 | 91.6996 | 108.372 | 104.974 | 83.9793 | 98.8106 | 97.5143 | 96.5347 | 88.5552 | 108.208958 | 90.1836 | 105.860637 |
| 99.1242 | 98.5771 | 101.491 | 99.7687 | 100.775 | 100.869 | 98.9484 | 111.386 | 96.3232 | 93.2835827 | 98.1644 | 100.138434 |
| 100.318 | 112.332 | 92.0298 | 90.2256 | 100.775 | 96.7521 | 103.25  | 103.96  | 105.645 | 83.9552228 | 102.155 | 94.4162435 |
| 99.1242 | 121.502 | 108.372 | 104.974 | 114.987 | 103.614 | 103.25  | 89.1089 | 105.645 | 108.208958 | 95.7702 | 100.138434 |
| 91.9586 | 100.87  | 110.952 | 104.974 | 98.1912 | 99.4968 | 96.0803 | 85.396  | 90.1088 | 100.746267 | 100.559 | 104.430089 |
| 103.901 | 107.747 | 104.071 | 95.4309 | 99.4832 | 103.614 | 96.0803 | 96.5347 | 108.752 | 93.2835827 | 102.155 | 100.138434 |
| 100.318 | 114.625 | 100.631 | 104.974 | 107.235 | 85.0869 | 103.25  | 103.96  | 90.1088 | 93.2835827 | 101.357 | 101.568994 |
| 102.707 | 100.87  | 103.211 | 101.504 | 99.4832 | 106.359 | 110.421 | 118.812 | 97.8767 | 97.0149278 | 99.7606 | 104.430089 |
| 100.318 | 98.5771 | 106.651 | 104.974 | 107.235 | 96.0659 | 98.9484 | 100.248 | 97.8767 | 100.746267 | 97.3663 | 95.8467912 |

|         |         |         |         |         |         |         |         |         |            |         |            |
|---------|---------|---------|---------|---------|---------|---------|---------|---------|------------|---------|------------|
| 99.1242 | 100.87  | 96.3303 | 101.504 | 104.651 | 109.103 | 98.9484 | 100.248 | 99.4303 | 93.2835827 | 109.338 | 74.3885578 |
| 94.3471 | 119.209 | 96.3303 | 109.312 | 112.403 | 107.731 | 98.9484 | 103.96  | 107.198 | 93.2835827 | 111.732 | 87.2634991 |
| 103.901 | 98.5771 | 98.0505 | 98.0335 | 94.3152 | 96.0659 | 93.2122 | 111.386 | 102.538 | 97.0149278 | 110.934 | 95.8467912 |
| 107.484 | 98.5771 | 98.9106 | 101.504 | 96.8992 | 106.359 | 96.0803 | 126.238 | 110.306 | 113.805972 | 102.155 | 97.277339  |
| 101.513 | 100.87  | 103.211 | 96.2984 | 90.4393 | 100.183 | 96.0803 | 111.386 | 107.198 | 108.208958 | 101.357 | 97.277339  |
| 105.096 | 98.5771 | 98.9106 | 97.166  | 105.943 | 102.242 | 103.25  | 100.248 | 105.645 | 100.746267 | 103.751 | 108.721732 |
| 101.513 | 89.4071 | 96.3303 | 96.2984 | 86.5633 | 103.614 | 98.9484 | 103.96  | 113.413 | 100.746267 | 101.357 | 104.430089 |
| 100.318 | 93.9921 | 98.0505 | 102.371 | 109.819 | 103.614 | 103.25  | 74.2574 | 96.3232 | 104.477607 | 101.357 | 105.860637 |
| 107.484 | 91.6996 | 102.351 | 107.577 | 104.651 | 102.928 | 108.987 | 100.248 | 99.4303 | 108.208958 | 106.943 | 94.4162435 |
| 113.455 | 107.747 | 100.631 | 107.577 | 82.6873 | 107.045 | 103.25  | 96.5347 | 100.984 | 100.746267 | 101.357 | 104.430089 |
| 197.054 | 199.447 | 157.397 | 163.1   | 316.537 | 221.638 | 174.952 | 163.366 | 201.72  | 233.20896  | 161.798 | 115.874483 |
| 206.608 | 169.644 | 150.516 | 150.954 | 276.486 | 219.212 | 162.046 | 141.089 | 210.96  | 223.880594 | 154.553 | 140.193818 |
| 205.414 | 185.692 | 151.376 | 159.63  | 270.026 | 231.466 | 169.216 | 141.089 | 169.384 | 229.477609 | 152.138 | 181.679737 |
| 212.58  | 181.107 | 153.956 | 165.703 | 233.85  | 214.446 | 166.348 | 152.228 | 181.702 | 229.477609 | 156.968 | 180.249189 |
| 208.997 | 183.399 | 151.376 | 153.557 | 258.398 | 213.765 | 164.914 | 178.218 | 175.543 | 208.955214 | 158.819 | 174.526998 |
| 225.717 | 169.644 | 141.055 | 144.014 | 254.522 | 195.384 | 173.518 | 155.941 | 177.083 | 233.20896  | 158.021 | 167.374248 |
| 218.551 | 158.182 | 146.216 | 134.471 | 251.938 | 213.765 | 169.216 | 155.941 | 181.702 | 231.343273 | 163.607 | 183.110296 |
| 220.939 | 165.059 | 135.894 | 162.232 | 244.186 | 189.938 | 157.744 | 167.079 | 167.844 | 236.940288 | 164.405 | 197.415785 |
| 211.385 | 167.352 | 142.775 | 159.63  | 224.806 | 194.023 | 167.782 | 155.941 | 177.083 | 225.746258 | 163.607 | 171.665903 |
| 211.385 | 165.059 | 137.615 | 149.219 | 236.434 | 182.45  | 169.216 | 174.505 | 183.242 | 220.149243 | 158.819 | 193.12413  |
| 210.191 | 167.352 | 141.055 | 151.822 | 204.134 | 185.173 | 172.084 | 144.802 | 172.463 | 216.417915 | 162.011 | 194.554678 |
| 205.414 | 169.644 | 144.495 | 155.292 | 228.682 | 189.387 | 169.216 | 148.515 | 169.384 | 231.343273 | 158.819 | 193.12413  |
| 207.803 | 162.767 | 135.894 | 150.954 | 220.93  | 199.68  | 169.216 | 152.228 | 158.605 | 227.611945 | 165.204 | 194.554678 |
| 198.248 | 187.984 | 142.775 | 145.749 | 211.886 | 184.584 | 163.48  | 148.515 | 177.083 | 197.761184 | 154.828 | 191.693582 |
| 199.443 | 165.059 | 136.755 | 152.689 | 211.886 | 194.19  | 179.254 | 155.941 | 155.525 | 220.149243 | 159.617 | 183.110296 |
| 204.22  | 171.937 | 141.055 | 143.146 | 218.346 | 175.663 | 177.82  | 155.941 | 164.764 | 201.492535 | 151.636 | 200.276869 |
| 193.471 | 153.597 | 134.174 | 150.087 | 228.682 | 181.839 | 170.65  | 167.079 | 166.304 | 197.761184 | 145.251 | 203.137988 |
| 183.917 | 167.352 | 136.755 | 146.617 | 195.09  | 183.211 | 163.48  | 159.653 | 163.224 | 208.955214 | 158.021 | 205.999083 |



|         |         |         |         |         |         |         |         |         |            |         |            |
|---------|---------|---------|---------|---------|---------|---------|---------|---------|------------|---------|------------|
| 192.277 | 155.889 | 137.615 | 168.305 | 193.798 | 188.015 | 173.518 | 144.802 | 172.463 | 208.955214 | 158.021 | 188.832487 |
| 186.306 | 139.842 | 140.195 | 134.471 | 215.762 | 178.408 | 172.084 | 148.515 | 163.224 | 225.746258 | 163.607 | 195.985237 |
| 189.889 | 181.107 | 143.635 | 146.617 | 211.886 | 183.13  | 166.348 | 141.089 | 172.463 | 225.746258 | 162.011 | 184.540844 |
| 179.14  | 160.474 | 138.475 | 138.809 | 208.01  | 190.619 | 166.348 | 159.653 | 170.923 | 210.8209   | 162.809 | 195.985237 |
| 167.197 | 158.182 | 127.294 | 151.822 | 202.842 | 183.13  | 167.782 | 163.366 | 181.702 | 223.880594 | 159.617 | 170.235343 |
| 188.694 | 169.644 | 142.775 | 150.087 | 191.214 | 185.853 | 174.952 | 141.089 | 170.923 | 210.8209   | 156.425 | 171.665903 |
| 167.197 | 162.767 | 136.755 | 150.087 | 210.594 | 181.088 | 176.386 | 152.228 | 163.224 | 205.223885 | 152.434 | 194.554678 |
| 124.204 | 142.134 | 135.894 | 136.206 | 200.258 | 181.088 | 160.612 | 133.663 | 181.702 | 201.492535 | 150.04  | 190.263035 |
| 144.506 | 160.474 | 142.775 | 157.027 | 201.731 | 180.407 | 150.574 | 141.089 | 172.463 | 184.70149  | 161.213 | 175.957546 |
| 137.341 | 144.427 | 140.195 | 139.676 | 183.51  | 185.173 | 157.744 | 148.515 | 183.242 | 208.955214 | 155.626 | 191.693582 |
| 134.952 | 169.644 | 142.775 | 147.484 | 192.62  | 177.684 | 167.782 | 129.95  | 177.083 | 199.626871 | 154.03  | 183.110296 |
| 144.506 | 167.352 | 142.775 | 146.617 | 193.922 | 178.365 | 166.348 | 159.653 | 177.083 | 212.686564 | 158.021 | 173.09645  |
| 143.312 | 162.767 | 143.635 | 144.881 | 199.128 | 172.919 | 159.178 | 118.812 | 161.684 | 207.08955  | 162.809 | 194.554678 |
| 145.701 | 176.522 | 147.936 | 137.941 | 193.922 | 172.919 | 160.612 | 122.525 | 157.065 | 207.08955  | 153.232 | 175.957546 |
| 150.478 | 169.644 | 144.495 | 149.219 | 206.937 | 174.28  | 160.612 | 141.089 | 164.764 | 197.761184 | 158.021 | 174.526998 |
| 154.061 | 160.474 | 142.775 | 152.689 | 199.128 | 179.046 | 146.272 | 126.238 | 180.163 | 192.164169 | 151.636 | 183.110296 |
| 142.118 | 153.597 | 135.034 | 152.689 | 210.841 | 172.919 | 159.178 | 159.653 | 174.003 | 194.029856 | 169.194 | 185.971392 |
| 142.118 | 162.767 | 133.314 | 148.352 | 195.223 | 173.599 | 152.008 | 129.95  | 157.065 | 225.746258 | 159.617 | 185.971392 |
| 150.478 | 167.352 | 138.475 | 144.014 | 195.223 | 177.684 | 156.31  | 144.802 | 169.384 | 210.8209   | 161.213 | 170.235343 |
| 145.701 | 158.182 | 144.495 | 148.352 | 208.238 | 177.003 | 146.272 | 155.941 | 183.242 | 197.761184 | 164.405 | 174.526998 |
| 152.866 | 146.719 | 136.755 | 144.881 | 218.65  | 166.792 | 173.518 | 126.238 | 157.065 | 218.283579 | 155.626 | 185.971392 |
| 140.924 | 165.059 | 147.936 | 150.954 | 174.4   | 178.365 | 169.216 | 126.238 | 153.985 | 201.492535 | 163.607 | 180.249189 |
| 161.226 | 171.937 | 141.055 | 145.749 | 197.826 | 166.792 | 162.046 | 144.802 | 161.684 | 188.432841 | 160.415 | 177.388094 |
| 169.586 | 165.059 | 141.915 | 144.881 | 216.047 | 174.961 | 172.084 | 144.802 | 161.684 | 192.164169 | 162.011 | 188.832487 |
| 158.838 | 158.182 | 137.615 | 144.014 | 208.238 | 169.515 | 170.65  | 148.515 | 158.605 | 197.761184 | 152.434 | 175.957546 |
| 143.312 | 167.352 | 146.216 | 143.146 | 201.731 | 164.749 | 157.744 | 137.376 | 160.144 | 188.432841 | 161.213 | 184.540844 |
| 137.341 | 158.182 | 147.076 | 141.411 | 190.017 | 174.28  | 162.046 | 185.644 | 181.702 | 203.358199 | 166.8   | 184.540844 |
| 145.701 | 167.352 | 146.216 | 141.411 | 184.812 | 159.303 | 162.046 | 144.802 | 141.666 | 173.50746  | 165.823 | 175.957546 |

|         |         |         |         |         |         |         |         |         |            |         |            |
|---------|---------|---------|---------|---------|---------|---------|---------|---------|------------|---------|------------|
| 152.866 | 162.767 | 136.755 | 127.53  | 200.429 | 168.153 | 167.782 | 148.515 | 155.525 | 190.298505 | 166.628 | 188.832487 |
| 150.478 | 151.304 | 133.314 | 135.338 | 173.098 | 172.238 | 166.348 | 137.376 | 164.764 | 171.641785 | 148.113 | 173.09645  |
| 155.255 | 160.474 | 134.174 | 143.146 | 218.65  | 161.345 | 172.084 | 126.238 | 152.445 | 180.970151 | 152.138 | 183.110296 |
| 162.42  | 153.597 | 126.433 | 148.352 | 190.017 | 159.984 | 149.14  | 181.931 | 195.561 | 177.2388   | 153.748 | 175.957546 |
| 175.557 | 149.012 | 117.833 | 136.95  | 190.017 | 169.515 | 170.65  | 159.653 | 189.402 | 190.298505 | 165.018 | 181.679737 |
| 168.392 | 158.182 | 122.993 | 134.316 | 199.128 | 157.941 | 163.48  | 148.515 | 163.224 | 192.164169 | 161.798 | 174.526998 |
| 171.975 | 165.059 | 129.014 | 124.659 | 212.143 | 162.026 | 156.31  | 181.931 | 187.862 | 169.776121 | 158.578 | 187.401939 |
| 167.197 | 160.474 | 116.972 | 128.171 | 193.922 | 149.772 | 169.216 | 144.802 | 186.322 | 184.70149  | 160.993 | 193.12413  |
| 175.557 | 153.597 | 135.034 | 132.56  | 190.017 | 162.707 | 156.31  | 148.515 | 189.402 | 208.955214 | 169.043 | 175.957546 |
| 180.334 | 155.889 | 141.915 | 137.827 | 214.746 | 162.026 | 152.008 | 141.089 | 180.163 | 208.955214 | 160.188 | 178.818641 |
| 180.334 | 178.814 | 146.216 | 137.827 | 197.826 | 164.749 | 163.48  | 126.238 | 155.525 | 173.50746  | 147.309 | 195.985237 |
| 183.917 | 165.059 | 143.635 | 131.682 | 195.223 | 164.749 | 141.969 | 141.089 | 181.702 | 171.641785 | 157.773 | 181.679737 |
| 170.78  | 167.352 | 144.495 | 155.385 | 180.907 | 162.707 | 169.216 | 129.95  | 167.844 | 199.626871 | 161.798 | 184.540844 |
| 183.917 | 158.182 | 131.594 | 139.583 | 197.826 | 168.153 | 152.008 | 137.376 | 164.764 | 190.298505 | 169.043 | 188.832487 |
| 185.111 | 146.719 | 132.454 | 128.171 | 187.415 | 162.026 | 160.612 | 148.515 | 166.304 | 186.567165 | 146.504 | 183.110296 |
| 179.14  | 158.182 | 136.755 | 134.316 | 174.4   | 160.664 | 164.914 | 144.802 | 177.083 | 158.582091 | 160.188 | 177.388094 |
| 188.694 | 169.644 | 141.915 | 137.827 | 186.113 | 170.876 | 150.574 | 137.376 | 178.623 | 175.373136 | 162.603 | 177.388094 |
| 175.557 | 165.059 | 147.076 | 123.781 | 192.62  | 156.58  | 166.348 | 122.525 | 177.083 | 169.776121 | 159.383 | 168.804795 |
| 187.5   | 171.937 | 136.755 | 140.461 | 182.209 | 166.111 | 159.178 | 126.238 | 167.844 | 194.029856 | 165.823 | 173.09645  |
| 195.86  | 158.182 | 135.034 | 150.118 | 161.385 | 161.345 | 173.518 | 111.386 | 163.224 | 173.50746  | 151.333 | 177.388094 |
| 187.5   | 162.767 | 150.516 | 125.537 | 184.812 | 157.941 | 164.914 | 155.941 | 180.163 | 186.567165 | 153.748 | 181.679737 |
| 188.694 | 194.862 | 163.417 | 121.148 | 174.4   | 149.772 | 162.046 | 122.525 | 174.003 | 194.029856 | 160.993 | 171.665903 |
| 180.334 | 171.937 | 136.755 | 136.95  | 170.495 | 154.537 | 152.008 | 144.802 | 177.083 | 171.641785 | 160.993 | 164.513152 |
| 180.334 | 171.937 | 146.216 | 113.247 | 171.797 | 154.537 | 160.612 | 141.089 | 177.083 | 175.373136 | 160.188 | 173.09645  |
| 182.723 | 165.059 | 140.195 | 131.682 | 178.304 | 153.857 | 157.744 | 152.228 | 181.702 | 160.447755 | 160.993 | 165.9437   |
| 177.946 | 181.107 | 143.635 | 115.002 | 192.62  | 150.453 | 149.14  | 167.079 | 187.862 | 169.776121 | 161.798 | 174.526998 |
| 173.169 | 183.399 | 150.516 | 128.171 | 182.209 | 149.091 | 144.837 | 155.941 | 186.322 | 169.776121 | 152.943 | 167.374248 |
| 183.917 | 176.522 | 143.635 | 111.491 | 184.812 | 149.772 | 163.48  | 137.376 | 187.862 | 173.50746  | 160.188 | 178.818641 |

|         |         |         |         |         |         |         |         |         |            |         |            |
|---------|---------|---------|---------|---------|---------|---------|---------|---------|------------|---------|------------|
| 185.111 | 155.889 | 133.314 | 122.903 | 186.113 | 140.241 | 179.254 | 163.366 | 190.941 | 171.641785 | 167.433 | 167.374248 |
| 176.752 | 165.059 | 142.775 | 143.973 | 158.782 | 137.518 | 160.612 | 103.96  | 172.463 | 175.373136 | 156.968 | 185.971392 |
| 179.14  | 165.059 | 151.376 | 130.804 | 169.194 | 151.134 | 163.48  | 126.238 | 158.605 | 167.910446 | 147.309 | 177.388094 |
| 188.694 | 171.937 | 147.936 | 126.415 | 158.782 | 140.922 | 159.178 | 129.95  | 164.764 | 169.776121 | 147.309 | 188.832487 |
| 182.723 | 171.937 | 147.936 | 130.804 | 173.098 | 146.368 | 162.046 | 174.505 | 200.181 | 136.194032 | 166.628 | 160.221509 |
| 176.752 | 174.229 | 146.216 | 115.002 | 153.576 | 138.199 | 179.254 | 141.089 | 181.702 | 113.805972 | 157.773 | 174.526998 |
| 186.306 | 169.644 | 149.656 | 132.56  | 165.289 | 150.453 | 176.386 | 141.089 | 186.322 | 162.313431 | 145.699 | 173.980493 |
| 176.752 | 162.767 | 136.755 | 121.148 | 167.892 | 142.283 | 180.688 | 141.089 | 177.083 | 149.253726 | 144.089 | 166.908115 |
| 183.917 | 165.059 | 145.356 | 129.049 | 147.068 | 142.964 | 167.782 | 141.089 | 183.242 | 130.597017 | 151.333 | 176.80944  |
| 179.14  | 171.937 | 150.516 | 116.758 | 175.701 | 144.326 | 166.348 | 148.515 | 175.543 | 123.134327 | 160.415 | 161.25021  |
| 177.946 | 167.352 | 148.796 | 136.95  | 175.701 | 131.391 | 162.046 | 133.663 | 183.242 | 138.059696 | 158.021 | 179.638399 |
| 185.111 | 167.352 | 142.775 | 128.171 | 182.209 | 152.495 | 144.837 | 137.376 | 169.384 | 128.731342 | 158.819 | 172.56602  |
| 185.111 | 167.352 | 146.216 | 136.072 | 166.591 | 137.518 | 166.348 | 148.515 | 167.844 | 145.522386 | 171.588 | 179.638399 |
| 177.946 | 165.059 | 141.915 | 135.194 | 200.429 | 138.199 | 159.178 | 141.089 | 172.463 | 119.402987 | 169.194 | 178.223925 |
| 179.14  | 171.937 | 143.635 | 130.804 | 154.877 | 143.645 | 153.442 | 152.228 | 177.083 | 139.925371 | 146.848 | 172.56602  |
| 177.946 | 174.229 | 117.833 | 129.926 | 171.797 | 137.518 | 166.348 | 122.525 | 170.923 | 132.462681 | 164.405 | 158.421263 |
| 185.111 | 174.229 | 136.755 | 124.659 | 182.209 | 149.772 | 174.952 | 144.802 | 190.941 | 126.865666 | 174.781 | 157.00679  |
| 179.14  | 178.814 | 129.874 | 131.682 | 158.782 | 140.241 | 164.914 | 144.802 | 180.163 | 151.119401 | 167.598 | 171.151547 |
| 179.14  | 178.814 | 135.894 | 123.781 | 170.495 | 141.603 | 170.65  | 152.228 | 169.384 | 132.462681 | 172.386 | 172.56602  |
| 185.111 | 176.522 | 140.195 | 129.049 | 166.591 | 143.645 | 156.31  | 133.663 | 161.684 | 95.1492525 | 169.992 | 189.539724 |
| 185.111 | 183.399 | 147.936 | 129.926 | 190.017 | 138.879 | 162.046 | 159.653 | 172.463 | 126.865666 | 164.405 | 178.223925 |
| 177.946 | 215.494 | 141.915 | 144.85  | 167.892 | 129.349 | 166.348 | 152.228 | 166.304 | 143.656711 | 166.002 | 175.394967 |
| 185.111 | 199.447 | 151.376 | 131.682 | 163.988 | 134.114 | 169.216 | 118.812 | 155.525 | 110.074622 | 162.809 | 172.56602  |
| 177.946 | 194.862 | 129.874 | 123.781 | 169.194 | 139.56  | 164.914 | 129.95  | 161.684 | 115.671637 | 157.223 | 166.908115 |
| 173.169 | 190.277 | 146.216 | 122.903 | 178.304 | 130.029 | 174.952 | 167.079 | 181.702 | 112.923749 | 164.405 | 171.151547 |
| 170.78  | 187.984 | 149.656 | 129.049 | 180.907 | 132.752 | 147.706 | 148.515 | 183.242 | 140.691882 | 162.603 | 176.80944  |
| 163.615 | 220.079 | 142.775 | 121.148 | 149.671 | 136.156 | 167.782 | 141.089 | 163.224 | 124.031002 | 159.383 | 176.80944  |
| 138.535 | 183.399 | 156.537 | 121.148 | 165.289 | 128.668 | 169.216 | 118.812 | 177.083 | 109.221334 | 144.894 | 164.079168 |

|         |         |         |         |         |         |         |         |         |            |         |            |
|---------|---------|---------|---------|---------|---------|---------|---------|---------|------------|---------|------------|
| 130.175 | 199.447 | 147.936 | 117.636 | 121.039 | 139.56  | 164.914 | 170.792 | 184.782 | 111.072547 | 152.138 | 158.421263 |
| 136.146 | 181.107 | 151.376 | 124.659 | 109.325 | 108.925 | 177.82  | 118.812 | 167.844 | 112.923749 | 140.064 | 166.908115 |
| 143.312 | 187.984 | 146.216 | 111.491 | 126.244 | 135.476 | 159.178 | 137.376 | 160.144 | 131.435842 | 145.699 | 171.151547 |
| 146.895 | 190.277 | 153.096 | 111.491 | 137.958 | 156.58  | 162.046 | 152.228 | 169.384 | 120.328588 | 150.528 | 178.223925 |
| 137.341 | 153.597 | 116.972 | 118.514 | 149.671 | 149.772 | 154.876 | 129.95  | 169.384 | 105.51892  | 137.649 | 155.592316 |
| 157.643 | 149.012 | 135.894 | 126.415 | 147.068 | 151.814 | 152.008 | 148.515 | 184.782 | 75.8995736 | 141.674 | 175.394967 |
| 149.283 | 116.917 | 121.273 | 124.659 | 114.531 | 145.687 | 160.612 | 103.96  | 164.764 | 112.923749 | 135.234 | 171.151547 |
| 143.312 | 112.332 | 120.413 | 120.27  | 152.274 | 149.772 | 167.782 | 148.515 | 175.543 | 85.1556146 | 135.234 | 188.12525  |
| 148.089 | 110.04  | 116.972 | 122.903 | 148.37  | 140.922 | 173.518 | 163.366 | 172.463 | 103.667708 | 135.234 | 164.079168 |
| 149.283 | 135.257 | 119.553 | 121.148 | 180.907 | 142.283 | 167.782 | 181.931 | 197.101 | 109.221334 | 134.429 | 176.80944  |
| 144.506 | 142.134 | 118.693 | 115.002 | 165.289 | 141.603 | 157.744 | 155.941 | 170.923 | 72.1971539 | 136.844 | 182.467345 |
| 138.535 | 123.794 | 122.993 | 122.026 | 175.701 | 134.795 | 150.574 | 163.366 | 175.543 | 109.221334 | 136.844 | 149.934411 |
| 144.506 | 128.379 | 121.273 | 113.247 | 147.068 | 124.583 | 147.706 | 152.228 | 166.304 | 81.4532004 | 130.404 | 181.052872 |
| 152.866 | 135.257 | 122.133 | 128.171 | 182.209 | 142.964 | 163.48  | 129.95  | 163.224 | 87.0068272 | 139.259 | 181.052872 |
| 146.895 | 132.964 | 112.672 | 103.59  | 173.098 | 129.349 | 166.348 | 144.802 | 167.844 | 70.3459412 | 123.16  | 104.671193 |
| 148.089 | 149.012 | 122.993 | 105.346 | 165.289 | 131.391 | 166.348 | 133.663 | 166.304 | 72.7611931 | 125.574 | 145.916008 |
| 151.672 | 142.134 | 102.351 | 111.491 | 170.495 | 130.029 | 169.216 | 155.941 | 181.702 | 97.0149278 | 127.989 | 203.137988 |
| 152.866 | 135.257 | 114.392 | 106.224 | 154.877 | 125.945 | 160.612 | 148.515 | 174.003 | 93.2835827 | 129.599 | 210.290726 |

**MI+ARM36**

|             |         |         |         |         |         |         |         |         |         |         |         |
|-------------|---------|---------|---------|---------|---------|---------|---------|---------|---------|---------|---------|
| 90.21544194 | 111.446 | 96.5073 | 99.3584 | 103.929 | 97.8532 | 104.717 | 93.361  | 90.3614 | 101.597 | 108.264 | 92.8793 |
| 90.21544194 | 105.422 | 115.809 | 91.1493 | 109.923 | 99.0593 | 104.717 | 105.809 | 90.3614 | 91.4369 | 84.728  | 102.167 |
| 91.5619397  | 108.434 | 85.4779 | 97.943  | 95.551  | 94.0741 | 110.377 | 99.5851 | 90.3614 | 104.499 | 100.418 | 111.455 |
| 87.52244067 | 99.3976 | 99.2647 | 87.1863 | 100.246 | 119.402 | 90.566  | 97.5104 | 93.9759 | 97.2424 | 106.695 | 102.167 |
| 94.25493522 | 93.3735 | 99.2647 | 91.1493 | 114.473 | 90.0539 | 107.547 | 107.884 | 133.735 | 105.951 | 111.402 | 130.031 |
| 95.60143873 | 102.41  | 97.886  | 93.98   | 102.123 | 120.447 | 101.887 | 95.4357 | 101.205 | 97.2424 | 111.402 | 111.455 |
| 92.90843746 | 102.41  | 104.779 | 99.6414 | 110.212 | 95.8431 | 93.3962 | 95.4357 | 86.747  | 98.6938 | 111.402 | 83.5913 |
| 98.29444    | 105.422 | 104.779 | 92.8477 | 111.151 | 102.838 | 87.7359 | 93.361  | 104.819 | 108.853 | 91.0042 | 65.0155 |
| 87.52244067 | 102.41  | 100.643 | 90.5831 | 93.8177 | 114.979 | 96.2264 | 99.5851 | 97.5904 | 82.7286 | 100.418 | 148.607 |
| 100.9874355 | 105.422 | 95.1287 | 91.7154 | 93.0955 | 113.854 | 87.7359 | 85.0622 | 97.5904 | 98.6938 | 117.678 | 74.3034 |
| 95.60143873 | 93.3735 | 96.5073 | 108.417 | 106.746 | 96.4863 | 107.547 | 101.66  | 108.434 | 78.3745 | 97.2803 | 55.7276 |
| 98.29444    | 105.422 | 103.401 | 104.737 | 88.4732 | 105.813 | 110.377 | 95.4357 | 86.747  | 91.4369 | 94.1423 | 120.743 |
| 94.25493522 | 102.41  | 102.022 | 106.718 | 99.3067 | 96.5667 | 93.3962 | 103.734 | 86.747  | 104.499 | 117.678 | 92.8793 |
| 103.680431  | 108.434 | 97.886  | 110.115 | 98.7289 | 94.3957 | 93.3962 | 105.809 | 133.735 | 98.6938 | 87.8661 | 111.455 |
| 95.60143873 | 102.41  | 95.1287 | 100.491 | 94.8288 | 118.517 | 90.566  | 101.66  | 115.663 | 94.3396 | 95.7113 | 92.8793 |
| 106.3734266 | 102.41  | 95.1287 | 108.983 | 99.2344 | 90.0539 | 118.868 | 120.332 | 104.819 | 95.791  | 105.126 | 148.607 |
| 107.7199243 | 96.3855 | 102.022 | 111.247 | 108.84  | 102.838 | 113.208 | 103.734 | 112.048 | 103.048 | 100.418 | 130.031 |
| 109.0664221 | 99.3976 | 102.022 | 99.6415 | 91.0732 | 107.019 | 127.358 | 130.705 | 126.506 | 107.402 | 111.402 | 74.3034 |
| 117.1454202 | 93.3735 | 102.022 | 103.038 | 118.807 | 93.5917 | 90.566  | 95.4357 | 115.663 | 103.048 | 87.8661 | 83.5913 |
| 109.0664221 | 117.47  | 95.1287 | 93.6969 | 89.051  | 100.105 | 99.0566 | 85.0622 | 93.9759 | 105.951 | 95.7113 | 55.7276 |

|             |         |         |         |         |         |         |         |         |         |         |         |
|-------------|---------|---------|---------|---------|---------|---------|---------|---------|---------|---------|---------|
| 102.3339333 | 93.3735 | 107.537 | 96.2446 | 109.418 | 107.904 | 104.717 | 97.5104 | 97.5904 | 103.048 | 119.247 | 102.167 |
| 107.7199243 | 69.2771 | 99.2647 | 96.8107 | 99.3789 | 88.687  | 76.4151 | 101.66  | 108.434 | 91.4369 | 94.1423 | 55.7276 |
| 92.90843746 | 120.482 | 97.886  | 103.888 | 101.184 | 95.039  | 101.887 | 99.5851 | 93.9759 | 120.464 | 92.5732 | 111.455 |
| 105.0269288 | 90.3614 | 104.779 | 107.284 | 99.6678 | 110.557 | 104.717 | 103.734 | 83.1325 | 105.951 | 92.5732 | 102.167 |
| 88.86893843 | 96.3855 | 103.401 | 104.737 | 81.2509 | 94.9586 | 93.3962 | 101.66  | 79.5181 | 117.562 | 89.4351 | 130.031 |
| 99.64093776 | 93.3735 | 102.022 | 108.983 | 95.2622 | 91.5011 | 99.0566 | 93.361  | 90.3614 | 105.951 | 98.8494 | 102.167 |
| 105.0269288 | 90.3614 | 93.75   | 101.057 | 91.4344 | 87.4809 | 116.038 | 118.257 | 86.747  | 94.3396 | 97.2803 | 111.455 |
| 115.7989224 | 96.3855 | 97.886  | 105.303 | 94.3233 | 100.667 | 87.7359 | 95.4357 | 93.9759 | 105.951 | 95.7113 | 120.743 |
| 110.4129313 | 93.3735 | 100.643 | 107.284 | 110.429 | 83.6215 | 96.2264 | 87.1369 | 112.048 | 87.0827 | 83.159  | 74.3034 |
| 106.3734266 | 99.3976 | 102.022 | 85.7709 | 88.0399 | 85.7924 | 90.566  | 85.0622 | 83.1325 | 98.6938 | 100.418 | 102.167 |
| 187.1633727 | 139.797 | 191.636 | 183.853 | 228.143 | 200.45  | 200.943 | 161.91  | 285.542 | 188.679 | 152.197 | 176.471 |
| 185.8168749 | 154.669 | 190.257 | 180.678 | 256.175 | 228.11  | 161.321 | 168.218 | 285.542 | 177.068 | 144.351 | 185.759 |
| 179.0843861 | 148.72  | 190.257 | 170.576 | 254.514 | 218.22  | 175.472 | 187.143 | 300     | 165.457 | 144.351 | 204.334 |
| 184.4703772 | 148.72  | 187.5   | 165.381 | 264.192 | 248.05  | 181.132 | 197.656 | 296.386 | 164.006 | 142.782 | 176.471 |
| 179.0843861 | 145.745 | 183.364 | 163.072 | 158.674 | 226.1   | 155.66  | 178.732 | 292.771 | 162.554 | 141.213 | 167.183 |
| 180.4308839 | 157.643 | 180.607 | 175.194 | 180.919 | 256.01  | 147.17  | 187.143 | 267.47  | 184.325 | 139.644 | 241.486 |
| 175.0448813 | 160.617 | 187.5   | 166.824 | 215.802 | 227.949 | 141.509 | 174.526 | 274.699 | 161.103 | 136.506 | 176.471 |
| 171.0053881 | 151.694 | 183.364 | 163.36  | 207.858 | 222.079 | 138.679 | 178.732 | 249.398 | 165.457 | 138.075 | 191.901 |
| 162.92639   | 133.848 | 187.5   | 169.422 | 211.902 | 203.425 | 130.189 | 170.321 | 292.771 | 146.589 | 150.628 | 210.177 |
| 160.2333945 | 154.669 | 186.121 | 165.958 | 219.63  | 239.849 | 121.698 | 172.423 | 300     | 158.2   | 131.799 | 219.315 |
| 153.5008942 | 142.771 | 179.228 | 156.145 | 212.986 | 239.849 | 138.679 | 172.423 | 296.386 | 166.909 | 158.473 | 219.315 |
| 161.5798922 | 142.771 | 180.607 | 155.279 | 221.436 | 239.045 | 138.679 | 185.04  | 314.458 | 162.554 | 144.351 | 191.901 |
| 168.3123925 | 116.002 | 181.985 | 155.279 | 229.597 | 215.888 | 130.189 | 159.807 | 263.855 | 158.2   | 144.351 | 164.486 |
| 164.2728878 | 133.848 | 177.849 | 160.763 | 229.669 | 210.099 | 141.509 | 176.629 | 278.313 | 153.846 | 127.092 | 164.486 |
| 161.5798922 | 121.95  | 183.364 | 150.661 | 235.447 | 223.929 | 130.189 | 187.143 | 285.542 | 156.749 | 155.335 | 164.486 |
| 165.6193855 | 130.873 | 184.743 | 154.125 | 215.947 | 223.848 | 141.509 | 176.629 | 281.928 | 175.617 | 138.075 | 228.453 |
| 168.3123925 | 136.822 | 180.607 | 162.206 | 217.897 | 223.848 | 141.509 | 176.629 | 256.627 | 162.554 | 144.351 | 191.901 |
| 152.1543964 | 139.797 | 187.5   | 146.909 | 230.103 | 219.748 | 118.868 | 182.937 | 271.084 | 165.457 | 134.937 | 182.762 |

|             |         |         |         |         |         |         |         |         |         |         |         |
|-------------|---------|---------|---------|---------|---------|---------|---------|---------|---------|---------|---------|
| 156.1939012 | 136.822 | 186.121 | 142.868 | 214.575 | 214.682 | 133.019 | 157.704 | 260.241 | 153.846 | 139.644 | 155.348 |
| 158.8868967 | 163.592 | 180.607 | 154.413 | 220.858 | 207.848 | 113.208 | 164.013 | 296.386 | 155.298 | 138.075 | 210.177 |
| 149.4614009 | 142.771 | 188.879 | 169.133 | 205.402 | 185.736 | 121.698 | 159.807 | 267.47  | 152.395 | 144.351 | 191.901 |
| 150.8078987 | 130.873 | 183.364 | 150.95  | 237.298 | 189.274 | 121.698 | 159.807 | 238.554 | 179.971 | 142.782 | 185.759 |
| 141.3824028 | 124.925 | 183.364 | 164.515 | 221.039 | 214.441 | 107.547 | 166.115 | 256.627 | 169.811 | 160.042 | 167.183 |
| 154.8473919 | 139.797 | 180.607 | 157.299 | 235.541 | 178.339 | 110.377 | 170.321 | 245.783 | 165.457 | 133.368 | 167.183 |
| 158.8868967 | 127.899 | 177.849 | 160.474 | 233.124 | 198.119 | 127.358 | 161.91  | 253.012 | 158.2   | 139.644 | 139.319 |
| 160.2333945 | 127.899 | 181.985 | 154.702 | 230.853 | 185.093 | 124.528 | 161.91  | 300     | 158.2   | 142.782 | 185.759 |
| 162.92639   | 130.873 | 181.985 | 147.198 | 240.081 | 185.093 | 130.189 | 155.602 | 267.47  | 165.457 | 142.782 | 176.471 |
| 149.4614009 | 130.873 | 180.607 | 146.62  | 252.02  | 171.987 | 127.358 | 153.499 | 249.398 | 166.909 | 144.351 | 167.183 |
| 157.540399  | 139.797 | 186.121 | 153.547 | 226.166 | 185.093 | 101.887 | 153.499 | 231.325 | 166.909 | 131.799 | 139.319 |
| 152.1543964 | 148.72  | 181.985 | 155.568 | 221.186 | 206.883 | 113.208 | 153.499 | 253.012 | 146.589 | 138.075 | 120.743 |
| 148.1149031 | 139.797 | 181.985 | 152.104 | 250.042 | 168.047 | 104.717 | 147.191 | 267.47  | 155.298 | 141.213 | 102.167 |
| 156.1939012 | 148.72  | 187.5   | 163.36  | 234.003 | 177.696 | 104.717 | 149.293 | 267.47  | 162.554 | 142.782 | 102.167 |
| 146.7684054 | 139.797 | 186.121 | 147.775 | 232.391 | 193.777 | 110.377 | 157.704 | 260.241 | 166.909 | 149.059 | 130.031 |
| 141.3824028 | 130.873 | 183.364 | 161.629 | 243.084 | 181.233 | 93.3962 | 145.088 | 274.699 | 155.298 | 141.213 | 130.031 |
| 157.540399  | 127.899 | 175.092 | 159.031 | 248.724 | 172.55  | 96.2264 | 147.191 | 234.94  | 149.492 | 150.628 | 111.455 |
| 149.4614009 | 133.848 | 184.743 | 151.816 | 237.005 | 194.581 | 76.4151 | 147.191 | 242.169 | 172.714 | 156.904 | 130.031 |
| 146.7684054 | 121.95  | 187.5   | 155.279 | 230.927 | 181.635 | 82.0755 | 132.472 | 296.386 | 165.457 | 125.523 | 92.8793 |
| 146.7684054 | 148.72  | 177.849 | 149.218 | 246.453 | 179.304 | 104.717 | 136.677 | 278.313 | 156.749 | 128.661 | 139.319 |
| 154.8473919 | 151.694 | 181.985 | 165.381 | 222.577 | 157.916 | 90.566  | 134.574 | 220.482 | 171.263 | 145.921 | 102.167 |
| 146.7684054 | 148.72  | 180.607 | 157.011 | 239.569 | 158.077 | 84.9057 | 132.472 | 220.482 | 161.103 | 139.644 | 127.934 |
| 150.8078987 | 142.771 | 179.228 | 151.816 | 238.543 | 168.208 | 90.566  | 132.472 | 216.867 | 174.165 | 141.213 | 127.934 |
| 148.1149031 | 124.925 | 179.228 | 153.259 | 227.557 | 177.937 | 96.2264 | 142.985 | 220.482 | 156.749 | 138.075 | 91.3812 |
| 141.3824028 | 133.848 | 168.199 | 153.259 | 227.265 | 180.671 | 101.887 | 128.266 | 209.639 | 159.652 | 134.937 | 63.9668 |
| 140.0359051 | 130.873 | 175.092 | 147.198 | 245.282 | 174.158 | 96.2264 | 130.369 | 209.639 | 155.298 | 131.799 | 82.2431 |
| 135.9964118 | 139.797 | 177.849 | 157.877 | 232.318 | 148.911 | 87.7359 | 126.164 | 227.711 | 171.263 | 141.213 | 82.2431 |
| 135.9964118 | 124.925 | 180.607 | 158.454 | 233.929 | 153.735 | 84.9057 | 138.78  | 249.398 | 178.52  | 131.799 | 54.8287 |

|             |         |         |         |         |         |         |         |         |         |         |         |
|-------------|---------|---------|---------|---------|---------|---------|---------|---------|---------|---------|---------|
| 138.6894073 | 145.745 | 177.849 | 150.372 | 219.648 | 144.167 | 101.887 | 138.78  | 220.482 | 162.554 | 128.661 | 100.519 |
| 146.7684054 | 142.771 | 177.849 | 165.958 | 239.935 | 163.062 | 104.717 | 128.266 | 253.012 | 168.36  | 133.368 | 100.519 |
| 140.0359051 | 136.822 | 183.364 | 161.34  | 243.524 | 161.373 | 118.868 | 145.088 | 253.012 | 162.554 | 139.644 | 91.3812 |
| 144.0754098 | 130.873 | 175.092 | 159.32  | 226.312 | 140.709 | 104.717 | 130.369 | 249.398 | 175.617 | 158.473 | 73.105  |
| 142.7289006 | 136.822 | 168.199 | 151.527 | 216.425 | 169.333 | 107.547 | 138.78  | 249.398 | 168.36  | 150.628 | 91.3812 |
| 140.0359051 | 121.95  | 169.577 | 160.474 | 241.986 | 140.79  | 104.717 | 142.985 | 242.169 | 162.554 | 138.075 | 82.2431 |
| 145.4219076 | 113.027 | 165.441 | 167.978 | 224.774 | 161.293 | 107.547 | 117.753 | 231.325 | 161.103 | 130.23  | 63.9668 |
| 138.6894073 | 124.925 | 176.471 | 161.34  | 233.417 | 166.117 | 113.208 | 147.191 | 224.096 | 162.554 | 134.937 | 92.8793 |
| 133.3034163 | 157.643 | 173.713 | 167.401 | 221.991 | 153.011 | 90.566  | 142.985 | 245.783 | 166.909 | 138.075 | 65.0155 |
| 134.649914  | 154.669 | 173.713 | 157.011 | 227.631 | 174.56  | 121.698 | 136.677 | 220.482 | 145.138 | 139.644 | 92.8793 |
| 133.3034163 | 133.848 | 173.713 | 161.34  | 240.228 | 158.961 | 118.868 | 147.191 | 216.867 | 169.811 | 144.351 | 65.0155 |
| 131.956907  | 133.848 | 175.092 | 156.433 | 222.064 | 152.448 | 118.868 | 134.574 | 224.096 | 172.714 | 125.523 | 111.455 |
| 130.6104093 | 139.797 | 175.092 | 152.97  | 233.27  | 149.715 | 99.0566 | 136.677 | 245.783 | 166.909 | 133.368 | 74.3034 |
| 129.2639115 | 151.694 | 177.849 | 147.775 | 247.918 | 144.89  | 113.208 | 134.574 | 224.096 | 156.749 | 127.092 | 120.743 |
| 127.9174137 | 130.873 | 186.121 | 162.495 | 229.828 | 171.746 | 135.849 | 136.677 | 231.325 | 177.068 | 139.644 | 55.7276 |
| 121.1849249 | 139.797 | 176.471 | 155.279 | 209.98  | 160.087 | 121.698 | 124.061 | 231.325 | 156.749 | 120.816 | 111.455 |
| 123.8779204 | 151.694 | 170.956 | 153.259 | 233.783 | 139.744 | 93.3962 | 142.985 | 227.711 | 165.457 | 145.921 | 65.0155 |
| 127.9174137 | 116.002 | 176.471 | 163.938 | 231.146 | 171.906 | 118.868 | 136.677 | 227.711 | 158.2   | 142.782 | 102.167 |
| 126.570916  | 148.72  | 181.985 | 150.661 | 233.856 | 134.357 | 113.208 | 124.061 | 249.398 | 161.103 | 141.213 | 65.0155 |
| 117.1454202 | 136.822 | 175.092 | 156.433 | 250.115 | 160.408 | 99.0566 | 132.472 | 253.012 | 169.811 | 136.506 | 46.4396 |
| 125.2244182 | 139.797 | 169.577 | 150.95  | 231.805 | 160.408 | 116.038 | 136.677 | 249.398 | 171.263 | 138.075 | 46.4396 |
| 131.956907  | 133.848 | 179.228 | 150.084 | 239.203 | 166.198 | 96.2264 | 138.78  | 242.169 | 155.298 | 145.921 | 74.3034 |
| 131.956907  | 116.002 | 170.956 | 144.023 | 253.792 | 132.025 | 110.377 | 134.574 | 224.096 | 159.652 | 144.351 | 18.5759 |
| 137.3429096 | 136.822 | 176.471 | 146.043 | 243.464 | 168.288 | 101.887 | 136.677 | 216.867 | 165.457 | 139.644 | 74.3034 |
| 134.649914  | 145.745 | 161.305 | 139.116 | 242.958 | 136.769 | 118.868 | 130.369 | 216.867 | 179.971 | 122.385 | 46.4396 |
| 127.9174137 | 142.771 | 169.577 | 133.921 | 231.041 | 147.785 | 104.717 | 138.78  | 220.482 | 164.006 | 139.644 | 83.5913 |
| 142.7289006 | 139.797 | 166.82  | 131.035 | 240.792 | 163.383 | 107.547 | 140.883 | 231.325 | 169.811 | 147.49  | 83.5913 |
| 138.6894073 | 136.822 | 164.062 | 126.705 | 236.747 | 150.117 | 101.887 | 145.088 | 216.867 | 150.943 | 152.197 | 65.0155 |



|             |         |         |         |         |         |         |         |         |         |         |         |
|-------------|---------|---------|---------|---------|---------|---------|---------|---------|---------|---------|---------|
| 142.7289006 | 148.72  | 181.985 | 130.169 | 233.569 | 139.181 | 107.547 | 128.266 | 216.867 | 171.263 | 141.213 | 83.5913 |
| 137.3429096 | 133.848 | 147.518 | 134.498 | 239.78  | 153.654 | 79.2453 | 117.753 | 253.012 | 169.811 | 150.628 | 46.4396 |
| 138.6894073 | 154.669 | 155.79  | 139.693 | 237.975 | 158.559 | 70.7547 | 134.574 | 256.627 | 169.811 | 145.921 | 55.7276 |
| 138.6894073 | 130.873 | 169.577 | 127.283 | 229.669 | 170.137 | 96.2264 | 130.369 | 202.41  | 164.006 | 127.092 | 55.7276 |
| 134.649914  | 139.797 | 175.092 | 135.653 | 245.414 | 157.031 | 96.2264 | 126.164 | 238.554 | 174.165 | 120.816 | 65.0155 |
| 129.2639115 | 116.002 | 172.335 | 126.128 | 239.492 | 121.814 | 93.3962 | 124.061 | 206.024 | 172.714 | 133.368 | 18.5759 |
| 142.7289006 | 130.873 | 183.364 | 121.799 | 218.619 | 150.921 | 84.9057 | 115.65  | 231.325 | 188.679 | 134.937 | 65.0155 |
| 131.956907  | 145.745 | 179.228 | 123.531 | 252.492 | 132.106 | 84.9057 | 136.677 | 234.94  | 177.068 | 133.368 | 46.4396 |
| 142.7289006 | 145.745 | 168.199 | 116.604 | 238.769 | 143.202 | 96.2264 | 126.164 | 213.253 | 177.068 | 134.937 | 37.1517 |
| 133.3034163 | 127.899 | 170.956 | 124.108 | 228.875 | 153.654 | 110.377 | 128.266 | 184.337 | 178.52  | 131.799 | 9.28793 |
| 134.649914  | 142.771 | 181.985 | 130.746 | 225.047 | 157.916 | 93.3962 | 145.088 | 209.639 | 165.457 | 125.523 | 37.1517 |
| 145.4219076 | 148.72  | 166.82  | 125.84  | 240.358 | 169.092 | 107.547 | 126.164 | 198.795 | 179.971 | 145.921 | 74.3034 |
| 150.8078987 | 127.899 | 172.335 | 130.169 | 243.608 | 154.941 | 107.547 | 130.369 | 227.711 | 175.617 | 128.661 | 74.3034 |
| 146.7684054 | 142.771 | 170.956 | 116.604 | 224.469 | 156.388 | 90.566  | 109.342 | 234.94  | 181.422 | 117.678 | 18.5759 |
| 123.8779204 | 127.899 | 161.305 | 120.933 | 226.636 | 158.961 | 67.9245 | 121.958 | 202.41  | 184.325 | 134.937 | 83.5913 |
| 137.3429096 | 130.873 | 172.335 | 121.799 | 210.169 | 109.592 | 84.9057 | 111.444 | 209.639 | 166.909 | 134.937 | 55.7276 |
| 141.3824028 | 139.797 | 165.441 | 125.262 | 217.247 | 104.125 | 56.6038 | 142.985 | 253.012 | 179.971 | 147.49  | 37.1517 |
| 148.1149031 | 127.899 | 172.335 | 118.335 | 222.88  | 111.683 | 101.887 | 119.855 | 206.024 | 174.165 | 130.23  | 55.7276 |
| 142.7289006 | 130.873 | 166.82  | 120.356 | 219.63  | 110.718 | 90.566  | 132.472 | 216.867 | 158.2   | 139.644 | 65.0155 |
| 141.3824028 | 113.027 | 165.441 | 111.12  | 218.908 | 114.577 | 104.717 | 107.239 | 245.783 | 162.554 | 127.092 | 9.28793 |
| 137.3429096 | 116.002 | 162.684 | 112.851 | 225.553 | 116.99  | 90.566  | 157.704 | 209.639 | 181.422 | 149.059 | 65.0155 |
| 145.4219076 | 121.95  | 177.849 | 121.799 | 212.047 | 111.442 | 113.208 | 105.136 | 206.024 | 182.874 | 138.075 | 27.8638 |
| 142.7289006 | 139.797 | 166.82  | 118.047 | 227.575 | 108.869 | 87.7359 | 77.8008 | 234.94  | 165.457 | 128.661 | 46.4396 |
| 146.7684054 | 130.873 | 165.441 | 114.583 | 213.347 | 117.954 | 93.3962 | 103.034 | 202.41  | 164.006 | 130.23  | 46.4396 |
| 140.0359051 | 121.95  | 173.713 | 110.254 | 206.991 | 121.01  | 93.3962 | 111.444 | 213.253 | 179.971 | 136.506 | 55.7276 |
| 148.1149031 | 157.643 | 170.956 | 99.8634 | 233.858 | 132.186 | 104.717 | 109.959 | 216.867 | 178.52  | 127.092 | 37.1517 |
| 134.649914  | 130.873 | 168.199 | 96.9773 | 215.08  | 115.703 | 93.3962 | 109.959 | 213.253 | 168.36  | 134.937 | 46.4396 |
| 146.7684054 | 116.002 | 168.199 | 92.9365 | 223.603 | 107.18  | 87.7359 | 105.809 | 213.253 | 190.131 | 134.937 | 9.28793 |

|             |         |         |         |         |         |         |         |         |         |         |         |
|-------------|---------|---------|---------|---------|---------|---------|---------|---------|---------|---------|---------|
| 131.956907  | 148.72  | 164.062 | 74.7533 | 219.052 | 105.009 | 90.566  | 126.556 | 198.795 | 169.811 | 131.799 | 46.4396 |
| 134.649914  | 139.797 | 177.849 | 80.2371 | 225.625 | 110.236 | 116.038 | 130.705 | 224.096 | 155.298 | 134.937 | 111.455 |
| 134.649914  | 127.899 | 180.607 | 72.7329 | 215.514 | 108.628 | 116.038 | 124.481 | 209.639 | 171.263 | 125.523 | 46.4396 |
| 130.6104093 | 136.822 | 193.015 | 81.6802 | 226.203 | 120.849 | 110.377 | 112.033 | 202.41  | 172.714 | 128.661 | 46.4396 |
| 129.2639115 | 124.925 | 186.121 | 84.855  | 225.625 | 125.432 | 84.9057 | 118.257 | 224.096 | 161.103 | 130.23  | 74.3034 |
| 127.9174137 | 118.976 | 198.529 | 73.5988 | 225.625 | 112.969 | 118.868 | 126.556 | 220.482 | 169.811 | 149.059 | 18.5759 |
| 131.956907  | 121.95  | 195.772 | 71.5785 | 213.997 | 117.874 | 113.208 | 107.884 | 209.639 | 172.714 | 120.816 | 55.7276 |
| 131.956907  | 136.822 | 194.393 | 79.0826 | 206.558 | 118.759 | 90.566  | 109.959 | 198.795 | 169.811 | 153.766 | 18.5759 |
| 127.9174137 | 116.002 | 190.257 | 76.7736 | 228.153 | 117.15  | 101.887 | 103.734 | 195.181 | 161.103 | 133.368 | 37.1517 |
| 131.956907  | 145.745 | 193.015 | 62.3425 | 210.025 | 125.834 | 96.2264 | 95.4357 | 166.265 | 153.846 | 127.092 | 37.1517 |
| 130.6104093 | 127.899 | 172.335 | 64.6515 | 211.252 | 131.221 | 93.3962 | 105.809 | 231.325 | 162.554 | 145.921 | 27.8638 |
| 134.649914  | 151.694 | 191.636 | 74.4646 | 210.963 | 114.095 | 101.887 | 107.884 | 191.566 | 174.165 | 134.937 | 65.0155 |
| 126.570916  | 139.797 | 179.228 | 54.8384 | 213.419 | 100.185 | 99.0566 | 118.257 | 184.337 | 164.006 | 120.816 | 9.28793 |
| 135.9964118 | 116.002 | 179.228 | 65.5174 | 218.186 | 124.387 | 101.887 | 118.257 | 209.639 | 169.811 | 141.213 | 18.5759 |
| 133.3034163 | 133.848 | 180.607 | 69.558  | 202.441 | 126.477 | 104.717 | 95.4357 | 191.566 | 178.52  | 127.092 | 27.8638 |
| 138.6894073 | 127.899 | 181.985 | 66.6718 | 201.286 | 127.603 | 99.0566 | 112.033 | 216.867 | 159.652 | 142.782 | 55.7276 |
| 125.2244182 | 127.899 | 173.713 | 67.2492 | 205.402 | 98.1748 | 101.887 | 114.108 | 234.94  | 161.103 | 149.059 | 46.4396 |
| 126.570916  | 121.95  | 175.092 | 66.6718 | 201.791 | 129.292 | 110.377 | 101.66  | 162.651 | 152.395 | 138.075 | 27.8638 |

**MI+S107**

|         |         |         |         |         |         |         |         |         |         |         |
|---------|---------|---------|---------|---------|---------|---------|---------|---------|---------|---------|
| 88.4982 | 93.0974 | 111.994 | 93.3099 | 101.042 | 115.799 | 91.7266 | 101.798 | 101.695 | 107.503 | 97.8139 |
| 83.1347 | 90.4872 | 66.7196 | 102.113 | 103.243 | 99.6409 | 89.9281 | 98.5607 | 130.751 | 114.222 | 94.441  |
| 87.6043 | 80.0464 | 102.462 | 88.0282 | 86.9538 | 88.8689 | 95.3237 | 81.6549 | 108.959 | 94.065  | 111.305 |
| 96.5435 | 80.0464 | 97.6966 | 112.676 | 75.0661 | 78.0969 | 88.1295 | 105.035 | 123.487 | 100.784 | 114.678 |
| 96.5435 | 67.8654 | 126.291 | 66.9014 | 80.5692 | 99.6409 | 95.3237 | 88.1297 | 112.591 | 77.2676 | 111.305 |
| 98.3313 | 68.7355 | 133.439 | 84.507  | 89.375  | 110.413 | 93.5252 | 82.3747 | 116.223 | 70.5487 | 101.187 |
| 101.013 | 94.8376 | 100.079 | 114.437 | 103.904 | 99.6409 | 88.1295 | 69.7843 | 123.487 | 97.4244 | 106.246 |
| 104.589 | 96.5777 | 107.228 | 77.4648 | 93.1171 | 91.5619 | 84.5324 | 70.8631 | 79.9031 | 83.9866 | 94.441  |
| 96.5435 | 96.5777 | 92.9309 | 100.352 | 95.9788 | 110.413 | 102.518 | 116.546 | 127.119 | 100.784 | 99.5003 |
| 98.3313 | 88.7471 | 111.994 | 88.0282 | 100.822 | 88.8689 | 104.317 | 84.5324 | 127.119 | 80.6271 | 102.873 |
| 94.7557 | 93.0974 | 92.9309 | 114.437 | 108.526 | 91.5619 | 95.3237 | 109.353 | 119.855 | 131.019 | 106.246 |
| 97.4374 | 105.278 | 102.462 | 89.7887 | 107.206 | 91.5619 | 106.115 | 93.1657 | 65.3753 | 124.3   | 91.0681 |
| 112.634 | 82.6566 | 116.759 | 66.9014 | 110.288 | 75.404  | 89.9281 | 91.367  | 90.799  | 107.503 | 112.992 |
| 102.801 | 96.5777 | 76.251  | 114.437 | 113.149 | 105.027 | 95.3237 | 127.697 | 83.5351 | 110.862 | 91.0681 |
| 99.2253 | 80.0464 | 92.9309 | 91.5493 | 78.3683 | 105.027 | 98.9209 | 110.432 | 112.591 | 117.581 | 84.3223 |
| 103.695 | 88.7471 | 85.7824 | 98.5915 | 108.967 | 123.878 | 116.906 | 120.863 | 105.327 | 90.7055 | 101.187 |
| 108.164 | 98.3179 | 90.5481 | 114.437 | 101.262 | 91.5619 | 109.712 | 78.4167 | 98.063  | 100.784 | 106.246 |
| 98.3313 | 96.5777 | 90.5481 | 88.0282 | 100.161 | 91.5619 | 104.317 | 109.353 | 98.063  | 114.222 | 109.619 |
| 92.0739 | 86.1369 | 95.3137 | 110.915 | 108.746 | 86.1759 | 95.3237 | 66.9068 | 79.9031 | 67.1892 | 101.187 |
| 102.801 | 84.3967 | 95.3137 | 91.5493 | 89.815  | 96.9479 | 106.115 | 116.907 | 79.9031 | 110.862 | 101.187 |

|         |         |         |         |         |         |         |         |         |         |         |
|---------|---------|---------|---------|---------|---------|---------|---------|---------|---------|---------|
| 104.589 | 93.0974 | 128.674 | 117.958 | 95.5383 | 107.72  | 113.309 | 126.979 | 61.7433 | 117.581 | 111.305 |
| 102.801 | 106.148 | 92.9309 | 147.887 | 99.9412 | 102.334 | 100.719 | 128.058 | 105.327 | 87.346  | 97.8139 |
| 95.6496 | 136.601 | 97.6966 | 88.0282 | 103.464 | 99.6409 | 97.1223 | 93.1657 | 98.063  | 100.784 | 91.0681 |
| 101.907 | 141.821 | 97.6966 | 116.197 | 116.451 | 99.6409 | 107.914 | 140.287 | 72.6392 | 90.7055 | 94.441  |
| 103.695 | 128.77  | 111.994 | 110.915 | 115.791 | 131.957 | 98.9209 | 87.7698 | 87.1671 | 87.346  | 74.2036 |
| 104.589 | 127.9   | 85.7824 | 98.5915 | 90.9157 | 99.6409 | 102.518 | 83.8134 | 83.5351 | 114.222 | 97.8139 |
| 102.801 | 119.2   | 109.611 | 86.2676 | 100.822 | 102.334 | 120.504 | 107.554 | 105.327 | 67.1892 | 94.441  |
| 101.907 | 129.64  | 83.3995 | 91.5493 | 93.9976 | 91.5619 | 89.9281 | 84.8923 | 65.3753 | 87.346  | 91.0681 |
| 112.634 | 131.381 | 104.845 | 119.718 | 107.206 | 134.65  | 97.1223 | 117.266 | 123.487 | 117.581 | 94.441  |
| 106.377 | 116.589 | 97.6966 | 114.437 | 119.313 | 88.8689 | 120.504 | 106.475 | 112.591 | 127.66  | 89.3816 |
| 197.239 | 232.309 | 176.33  | 235.915 | 281.553 | 199.282 | 257.194 | 184.716 | 261.291 | 255.319 | 148.407 |
| 205.602 | 268.91  | 200.159 | 241.197 | 273.848 | 215.44  | 239.209 | 188.747 | 282.767 | 272.116 | 145.034 |
| 208.284 | 249.71  | 197.776 | 242.958 | 271.646 | 212.747 | 260.791 | 225.397 | 200.442 | 275.476 | 158.526 |
| 213.647 | 254.06  | 212.073 | 242.958 | 252.715 | 188.51  | 246.403 | 242.256 | 236.235 | 262.038 | 153.467 |
| 217.223 | 268.852 | 200.159 | 237.676 | 252.495 | 210.054 | 262.59  | 204.507 | 229.077 | 295.633 | 153.467 |
| 226.162 | 253.19  | 185.862 | 220.07  | 258.439 | 164.273 | 246.403 | 196.443 | 236.235 | 312.43  | 153.467 |
| 226.162 | 316.676 | 178.713 | 209.507 | 246.992 | 199.282 | 262.59  | 237.858 | 239.815 | 268.757 | 134.916 |
| 222.586 | 288.37  | 204.925 | 216.549 | 277.37  | 188.51  | 255.396 | 237.858 | 214.759 | 278.835 | 141.661 |
| 218.117 | 301.914 | 204.925 | 225.352 | 267.244 | 177.738 | 262.59  | 182.883 | 211.18  | 272.116 | 153.467 |
| 223.48  | 292.343 | 200.159 | 220.07  | 258.879 | 164.273 | 244.604 | 200.108 | 207.601 | 245.241 | 150.094 |
| 227.95  | 284.513 | 200.159 | 221.831 | 263.942 | 177.738 | 242.806 | 211.47  | 178.966 | 262.038 | 151.78  |
| 221.692 | 280.162 | 209.69  | 246.479 | 239.727 | 185.817 | 255.396 | 226.496 | 182.546 | 251.96  | 150.094 |
| 221.692 | 266.241 | 200.159 | 248.239 | 250.734 | 177.738 | 251.799 | 204.14  | 243.341 | 204.927 | 150.094 |
| 223.48  | 283.063 | 197.776 | 230.634 | 247.212 | 177.738 | 242.806 | 197.909 | 181.598 | 238.522 | 133.229 |
| 219.011 | 269.794 | 188.245 | 223.592 | 251.835 | 172.352 | 260.791 | 184.716 | 199.758 | 241.881 | 153.467 |
| 219.011 | 262.718 | 190.627 | 214.789 | 268.564 | 164.273 | 244.604 | 199.742 | 185.23  | 251.96  | 134.916 |
| 214.541 | 261.833 | 197.776 | 209.507 | 260.86  | 180.431 | 242.806 | 210.737 | 170.702 | 228.443 | 150.094 |
| 227.95  | 256.526 | 188.245 | 223.592 | 259.099 | 153.501 | 244.604 | 175.553 | 148.91  | 225.084 | 139.975 |

|         |         |         |         |         |         |         |         |         |         |         |
|---------|---------|---------|---------|---------|---------|---------|---------|---------|---------|---------|
| 226.162 | 241.488 | 190.627 | 197.183 | 214.852 | 201.975 | 235.612 | 199.009 | 228.814 | 248.6   | 143.348 |
| 234.207 | 230.873 | 190.627 | 200.704 | 241.048 | 153.501 | 232.014 | 177.019 | 199.758 | 218.365 | 136.602 |
| 225.268 | 247.1   | 188.245 | 209.507 | 250.954 | 180.431 | 269.784 | 230.528 | 174.334 | 258.679 | 148.407 |
| 235.101 | 247.1   | 197.776 | 198.944 | 257.778 | 188.51  | 250     | 161.993 | 185.23  | 231.803 | 172.017 |
| 193.981 | 226.218 | 185.862 | 207.746 | 246.111 | 150.808 | 235.612 | 153.196 | 203.39  | 241.881 | 131.543 |
| 202.026 | 227.958 | 195.393 | 207.746 | 258.658 | 153.501 | 285.971 | 145.867 | 199.758 | 231.803 | 139.975 |
| 231.526 | 221.868 | 202.542 | 205.986 | 263.942 | 180.431 | 275.18  | 160.072 | 185.23  | 231.803 | 150.094 |
| 244.041 | 227.088 | 202.542 | 221.831 | 259.099 | 183.124 | 284.173 | 173.381 | 196.126 | 282.195 | 143.348 |
| 245.828 | 237.529 | 200.159 | 221.831 | 269.445 | 175.045 | 293.165 | 206.474 | 268.765 | 272.116 | 151.78  |
| 265.495 | 236.659 | 197.776 | 198.944 | 248.973 | 193.896 | 271.583 | 221.223 | 254.237 | 278.835 | 134.916 |
| 245.828 | 227.958 | 197.776 | 202.465 | 271.427 | 177.738 | 275.18  | 176.259 | 261.501 | 258.679 | 146.721 |
| 244.041 | 225.348 | 209.69  | 193.662 | 256.017 | 188.51  | 284.173 | 235.971 | 254.237 | 275.476 | 145.034 |
| 237.783 | 225.348 | 204.925 | 207.254 | 250.073 | 156.194 | 287.77  | 256.183 | 236.077 | 255.319 | 153.467 |
| 232.42  | 221.868 | 183.479 | 214.221 | 209.569 | 204.668 | 302.158 | 236.758 | 196.863 | 258.679 | 141.661 |
| 230.632 | 208.817 | 204.925 | 195.063 | 238.406 | 172.352 | 269.784 | 219.899 | 204.021 | 258.679 | 146.721 |
| 230.632 | 197.506 | 200.159 | 195.063 | 253.595 | 169.659 | 271.583 | 194.978 | 218.339 | 282.195 | 150.094 |
| 227.95  | 214.066 | 178.713 | 195.063 | 249.193 | 175.045 | 302.158 | 254.351 | 182.546 | 265.398 | 145.034 |
| 221.692 | 200.798 | 171.565 | 193.321 | 238.186 | 172.352 | 294.964 | 244.089 | 225.497 | 275.476 | 136.602 |
| 219.905 | 205.22  | 178.713 | 175.905 | 237.526 | 166.966 | 280.576 | 216.968 | 250.553 | 241.881 | 143.348 |
| 210.965 | 197.259 | 176.33  | 188.096 | 254.036 | 137.343 | 278.777 | 250.719 | 272.029 | 215.006 | 141.661 |
| 202.92  | 202.567 | 178.713 | 182.871 | 242.368 | 191.203 | 284.173 | 244.604 | 254.132 | 231.803 | 136.602 |
| 208.284 | 181.337 | 185.862 | 179.388 | 248.312 | 175.045 | 291.367 | 235.612 | 246.973 | 208.287 | 138.289 |
| 224.374 | 191.952 | 173.948 | 175.905 | 247.431 | 180.431 | 305.755 | 210.792 | 279.661 | 215.006 | 138.289 |
| 211.859 | 206.99  | 154.885 | 175.905 | 245.231 | 153.501 | 300.36  | 217.266 | 283.293 | 231.803 | 138.289 |
| 206.496 | 215.835 | 190.627 | 165.455 | 269.445 | 172.352 | 294.964 | 229.496 | 214.286 | 238.522 | 128.17  |
| 215.435 | 220.258 | 204.925 | 214.221 | 260.42  | 166.966 | 307.554 | 223.021 | 250.605 | 235.162 | 139.975 |
| 223.48  | 179.568 | 188.245 | 229.896 | 264.823 | 175.045 | 307.554 | 248.561 | 257.869 | 248.6   | 128.17  |
| 215.435 | 191.952 | 183.479 | 202.029 | 277.59  | 185.817 | 300.36  | 248.561 | 217.918 | 255.319 | 121.424 |

|         |         |         |         |         |         |         |         |         |         |         |
|---------|---------|---------|---------|---------|---------|---------|---------|---------|---------|---------|
| 211.859 | 180.452 | 207.307 | 200.288 | 263.722 | 166.966 | 314.748 | 215.467 | 217.918 | 248.6   | 128.17  |
| 215.435 | 187.529 | 185.862 | 215.962 | 257.118 | 177.738 | 289.568 | 252.877 | 217.918 | 262.038 | 136.602 |
| 210.072 | 196.636 | 200.159 | 195.063 | 278.691 | 164.273 | 303.957 | 249.64  | 272.397 | 248.6   | 150.094 |
| 211.859 | 204.466 | 200.159 | 198.546 | 271.207 | 169.659 | 327.338 | 239.928 | 228.814 | 221.725 | 146.721 |
| 211.859 | 195.766 | 185.862 | 207.254 | 262.621 | 161.58  | 341.727 | 271.942 | 214.286 | 295.633 | 134.916 |
| 219.011 | 163.573 | 166.799 | 182.871 | 274.729 | 161.58  | 330.935 | 271.942 | 250.605 | 278.407 | 129.856 |
| 219.011 | 149.652 | 171.565 | 168.938 | 260.64  | 166.966 | 330.935 | 224.46  | 228.814 | 254.64  | 129.856 |
| 210.072 | 188.414 | 171.565 | 165.455 | 258.218 | 177.738 | 354.317 | 199.28  | 207.022 | 271.616 | 138.289 |
| 219.011 | 194.606 | 200.159 | 165.455 | 256.897 | 185.817 | 312.95  | 251.799 | 225.182 | 258.035 | 133.229 |
| 218.117 | 185.76  | 181.096 | 189.838 | 283.754 | 175.045 | 329.137 | 223.741 | 221.55  | 230.874 | 139.975 |
| 205.602 | 177.799 | 181.096 | 172.422 | 283.094 | 185.817 | 316.547 | 264.029 | 196.126 | 241.059 | 116.365 |
| 202.026 | 185.76  | 193.01  | 179.388 | 263.061 | 158.887 | 309.353 | 251.439 | 210.654 | 241.059 | 139.975 |
| 183.254 | 199.246 | 202.542 | 189.838 | 277.59  | 188.51  | 320.144 | 205.755 | 207.022 | 241.059 | 124.797 |
| 215.406 | 200.986 | 200.159 | 200.288 | 261.08  | 164.273 | 294.964 | 237.769 | 225.182 | 237.664 | 131.543 |
| 214.541 | 197.506 | 226.37  | 196.804 | 266.584 | 183.124 | 311.151 | 210.791 | 217.918 | 264.826 | 123.111 |
| 214.541 | 190.545 | 195.393 | 236.862 | 287.056 | 172.352 | 303.957 | 275.18  | 196.126 | 224.083 | 150.094 |
| 212.811 | 197.506 | 193.01  | 205.513 | 264.603 | 191.203 | 291.367 | 251.798 | 141.646 | 200.317 | 139.975 |
| 211.946 | 196.636 | 185.862 | 191.58  | 276.93  | 169.659 | 307.554 | 276.259 | 193.283 | 200.317 | 138.289 |
| 222.327 | 199.246 | 188.245 | 186.355 | 278.471 | 169.659 | 314.748 | 232.734 | 246.973 | 203.712 | 134.916 |
| 225.787 | 197.506 | 200.159 | 195.063 | 275.169 | 140.036 | 323.741 | 229.496 | 232.656 | 196.922 | 133.229 |
| 218.001 | 192.285 | 188.245 | 184.613 | 274.728 | 164.273 | 316.547 | 234.892 | 189.704 | 207.107 | 134.916 |
| 219.732 | 194.026 | 159.651 | 191.58  | 286.396 | 188.51  | 318.345 | 229.137 | 189.704 | 179.946 | 139.975 |
| 220.597 | 195.766 | 171.565 | 153.264 | 286.616 | 177.738 | 323.741 | 251.439 | 243.394 | 207.107 | 141.661 |
| 219.732 | 194.896 | 159.651 | 177.647 | 293.66  | 166.966 | 321.942 | 226.978 | 214.759 | 224.083 | 118.051 |
| 222.327 | 218.387 | 159.651 | 141.072 | 280.232 | 140.036 | 309.353 | 259.352 | 225.497 | 190.131 | 133.229 |
| 216.271 | 191.415 | 166.799 | 163.713 | 299.164 | 169.659 | 305.755 | 218.345 | 225.497 | 213.898 | 141.661 |
| 221.462 | 172.274 | 154.885 | 175.905 | 280.892 | 166.966 | 316.547 | 231.295 | 204.021 | 210.502 | 139.975 |
| 209.351 | 174.884 | 159.651 | 161.972 | 287.936 | 145.422 | 307.554 | 258.632 | 177.966 | 203.712 | 126.483 |

|         |         |         |         |         |         |         |         |         |         |         |
|---------|---------|---------|---------|---------|---------|---------|---------|---------|---------|---------|
| 211.081 | 196.375 | 195.393 | 156.747 | 299.824 | 156.194 | 303.957 | 198.561 | 221.55  | 210.502 | 143.348 |
| 211.081 | 195.49  | 200.159 | 163.713 | 299.604 | 150.808 | 321.942 | 229.496 | 217.918 | 207.107 | 138.289 |
| 198.97  | 222.027 | 231.136 | 160.23  | 282.213 | 164.273 | 296.763 | 245.324 | 232.446 | 200.317 | 124.797 |
| 202.43  | 213.182 | 243.05  | 170.68  | 278.251 | 150.808 | 323.741 | 211.511 | 236.077 | 159.574 | 114.678 |
| 204.16  | 220.258 | 221.604 | 177.647 | 281.333 | 166.966 | 327.338 | 217.626 | 163.438 | 193.526 | 141.661 |
| 202.43  | 215.835 | 212.073 | 186.355 | 284.194 | 183.124 | 329.137 | 243.885 | 232.446 | 203.712 | 134.916 |
| 207.62  | 200.798 | 159.651 | 195.063 | 270.546 | 188.51  | 320.144 | 252.158 | 203.39  | 203.712 | 123.111 |
| 155.715 | 231.439 | 223.987 | 189.838 | 269.005 | 158.887 | 336.331 | 265.108 | 228.814 | 186.736 | 123.111 |
| 186.83  | 221.868 | 245.433 | 233.379 | 261.961 | 175.045 | 350.719 | 251.079 | 210.654 | 193.526 | 133.229 |
| 194.875 | 221.868 | 221.604 | 181.13  | 243.249 | 204.668 | 348.921 | 231.295 | 199.758 | 179.946 | 116.365 |
| 222.586 | 221.868 | 200.159 | 177.647 | 242.809 | 196.589 | 347.122 | 205.036 | 239.709 | 190.131 | 139.975 |
| 237.783 | 214.037 | 223.987 | 177.647 | 254.916 | 180.431 | 321.942 | 204.317 | 174.334 | 179.946 | 128.17  |
| 253.874 | 200.986 | 219.222 | 181.338 | 243.91  | 201.975 | 250.842 | 233.812 | 177.966 | 173.155 | 114.678 |
| 246.722 | 208.817 | 212.073 | 114.437 | 256.677 | 183.124 | 230.847 | 209.353 | 170.702 | 162.97  | 124.797 |
| 245.828 | 220.998 | 209.69  | 109.155 | 252.715 | 169.659 | 269.019 | 235.971 | 207.022 | 169.76  | 138.289 |
| 246.722 | 223.608 | 195.393 | 117.958 | 248.312 | 175.045 | 261.748 | 207.553 | 181.598 | 169.76  | 146.721 |
| 246.722 | 215.777 | 200.159 | 128.521 | 242.369 | 161.58  | 281.743 | 233.093 | 167.07  | 166.365 | 121.424 |
| 234.207 | 214.037 | 188.245 | 149.648 | 245.01  | 188.51  | 307.19  | 215.828 | 188.862 | 166.365 | 129.856 |
| 235.101 | 217.517 | 188.245 | 130.282 | 251.394 | 185.817 | 294.467 | 226.259 | 239.709 | 176.55  | 129.856 |
| 231.526 | 218.387 | 173.948 | 137.324 | 251.174 | 148.115 | 307.19  | 229.137 | 177.966 | 176.55  | 138.289 |
| 215.435 | 209.687 | 209.69  | 137.324 | 245.231 | 175.045 | 314.461 | 216.906 | 232.446 | 169.76  | 133.229 |
| 216.329 | 210.557 | 204.925 | 132.042 | 250.734 | 164.273 | 301.737 | 259.352 | 177.966 | 162.97  | 123.111 |
| 219.905 | 210.557 | 176.33  | 188.38  | 251.174 | 156.194 | 294.467 | 220.863 | 254.237 | 159.574 | 128.17  |
| 209.178 | 206.207 | 188.245 | 142.606 | 249.193 | 180.431 | 292.649 | 245.683 | 228.814 | 179.946 | 131.543 |
| 214.541 | 147.042 | 193.01  | 132.042 | 252.275 | 164.273 | 276.29  | 253.956 | 188.862 | 173.155 | 124.797 |
| 199.344 | 182.222 | 171.565 | 140.845 | 249.413 | 166.966 | 298.102 | 240.647 | 228.814 | 135.808 | 131.543 |
| 191.299 | 214.066 | 190.627 | 153.169 | 263.282 | 153.501 | 299.92  | 223.741 | 236.077 | 166.365 | 136.602 |
| 187.723 | 203.451 | 178.713 | 209.507 | 249.193 | 169.659 | 305.373 | 187.05  | 257.869 | 169.76  | 128.17  |

|         |         |         |         |         |         |         |         |         |         |         |
|---------|---------|---------|---------|---------|---------|---------|---------|---------|---------|---------|
| 216.329 | 220.258 | 162.033 | 133.803 | 245.891 | 183.124 | 343.544 | 235.971 | 203.39  | 159.574 | 138.289 |
| 210.072 | 208.759 | 171.565 | 140.845 | 258.879 | 169.659 | 310.826 | 252.517 | 228.814 | 166.365 | 128.17  |
| 214.541 | 211.412 | 178.713 | 169.014 | 251.835 | 172.352 | 298.102 | 200.36  | 214.286 | 159.574 | 134.916 |
| 209.178 | 219.374 | 164.416 | 133.803 | 250.073 | 169.659 | 316.279 | 231.655 | 210.654 | 179.946 | 129.856 |
| 212.753 | 207.874 | 152.502 | 135.563 | 250.073 | 158.887 | 314.461 | 230.216 | 207.022 | 176.55  | 146.721 |
| 215.435 | 201.682 | 162.033 | 125     | 248.973 | 156.194 | 301.737 | 192.779 | 188.862 | 176.55  | 118.051 |
| 204.708 | 187.065 | 162.033 | 133.803 | 251.614 | 188.51  | 303.555 | 191.68  | 276.029 | 125.622 | 129.856 |
| 206.496 | 207.947 | 159.651 | 142.606 | 245.891 | 156.194 | 299.92  | 204.14  | 246.973 | 176.55  | 133.229 |
| 209.178 | 226.45  | 154.885 | 154.93  | 256.677 | 148.115 | 307.19  | 211.103 | 228.814 | 156.179 | 119.738 |
| 201.132 | 222.027 | 169.182 | 161.972 | 258.439 | 158.887 | 301.737 | 242.622 | 250.605 | 183.341 | 151.78  |
| 198.451 | 210.528 | 162.033 | 126.761 | 261.08  | 164.273 | 307.19  | 245.554 | 217.918 | 139.203 | 131.543 |
| 188.617 | 214.907 | 157.268 | 140.845 | 260.86  | 158.887 | 290.831 | 203.773 | 207.022 | 166.365 | 119.738 |
| 193.981 | 205.336 | 164.416 | 139.085 | 244.79  | 137.343 | 289.013 | 255.45  | 301.453 | 149.389 | 139.975 |
| 202.43  | 203.596 | 164.416 | 154.93  | 234.884 | 156.194 | 299.92  | 198.642 | 228.814 | 162.97  | 118.051 |
| 199.835 | 209.643 | 147.736 | 140.845 | 225.638 | 201.975 | 274.472 | 196.443 | 239.709 | 166.365 | 143.348 |
| 194.644 | 211.412 | 142.971 | 144.366 | 239.947 | 193.896 | 274.472 | 205.24  | 239.709 | 169.76  | 148.407 |
| 191.184 | 192.836 | 162.033 | 100.352 | 213.531 | 228.905 | 279.925 | 234.193 | 228.814 | 162.97  | 134.916 |
| 192.914 | 194.606 | 142.971 | 140.845 | 233.563 | 204.668 | 278.107 | 220.266 | 225.182 | 200.317 | 136.602 |



### MI+Prop

|             |         |         |         |         |         |         |         |             |         |         |         |         |         |         |         |         |
|-------------|---------|---------|---------|---------|---------|---------|---------|-------------|---------|---------|---------|---------|---------|---------|---------|---------|
| 90.68279127 | 91.6767 | 99.6169 | 101.626 | 89.2926 | 94.5473 | 78.8136 | 94.3396 | 76.14213358 | 109.056 | 99.8703 | 101.146 | 96.5909 | 87.2657 | 89.1473 | 97.4244 | 112.966 |
| 86.415365   | 85.6454 | 107.28  | 85.3659 | 102.049 | 99.0495 | 94.0678 | 101.887 | 82.23350262 | 86.4925 | 94.6822 | 91.0317 | 88.0682 | 87.2657 | 89.1473 | 94.0649 | 85.5254 |
| 92.8165018  | 91.6767 | 88.1226 | 95.5285 | 90.4523 | 97.5488 | 96.6102 | 105.66  | 109.6446702 | 94.0136 | 93.3852 | 95.0775 | 85.2273 | 95.0226 | 73.6434 | 94.0649 | 78.1947 |
| 83.214794   | 101.327 | 61.3027 | 95.5285 | 88.133  | 96.048  | 99.1525 | 109.434 | 85.27918486 | 101.535 | 94.6822 | 89.0088 | 79.5455 | 93.0834 | 89.1473 | 97.4244 | 112.405 |
| 87.48221507 | 86.8516 | 107.28  | 73.1707 | 89.2926 | 103.552 | 101.695 | 94.3396 | 118.781726  | 112.816 | 95.9792 | 101.146 | 102.273 | 114.415 | 85.2713 | 94.0649 | 79.3163 |
| 104.5519201 | 77.2014 | 122.605 | 97.561  | 81.1751 | 109.555 | 94.0678 | 113.208 | 100.5076143 | 99.6544 | 90.7912 | 99.1234 | 119.318 | 85.3264 | 93.0233 | 100.784 | 129.79  |
| 108.8193412 | 104.946 | 107.28  | 103.659 | 95.0908 | 105.053 | 88.9831 | 90.566  | 82.23350262 | 95.8939 | 89.4942 | 91.0317 | 90.9091 | 104.719 | 124.031 | 94.0649 | 98.5445 |
| 103.4850649 | 100.121 | 95.7854 | 105.691 | 96.2505 | 105.053 | 83.8983 | 109.434 | 82.23350262 | 90.2531 | 95.9792 | 99.1234 | 102.273 | 96.9619 | 85.2713 | 94.0649 | 78.1947 |
| 99.21764381 | 96.5018 | 95.7854 | 99.5935 | 93.9312 | 99.0495 | 99.1525 | 101.887 | 100.5076143 | 103.415 | 97.2763 | 86.9858 | 93.75   | 106.658 | 85.2713 | 107.503 | 80.6383 |
| 101.3513543 | 98.9144 | 137.931 | 99.5935 | 109.007 | 93.0465 | 101.695 | 98.1132 | 103.5532966 | 112.816 | 94.6822 | 93.0546 | 107.955 | 102.78  | 89.1473 | 94.0649 | 73.3075 |
| 108.8193412 | 96.5018 | 91.954  | 111.789 | 76.5365 | 102.051 | 104.237 | 101.887 | 121.8274082 | 94.0136 | 93.3852 | 99.1234 | 102.273 | 87.2657 | 89.1473 | 114.222 | 117.292 |
| 104.5519201 | 102.533 | 95.7854 | 105.691 | 102.049 | 109.555 | 101.695 | 109.434 | 94.4162407  | 112.816 | 93.3852 | 101.146 | 88.0682 | 83.3872 | 85.2713 | 90.7055 | 46.4281 |
| 103.4850649 | 115.802 | 84.2912 | 85.3659 | 111.326 | 102.051 | 73.7288 | 116.981 | 82.23350262 | 101.535 | 101.167 | 89.0088 | 105.114 | 106.658 | 65.8915 | 94.0649 | 62.4917 |
| 97.08392287 | 107.358 | 107.28  | 99.5935 | 111.326 | 108.054 | 114.407 | 94.3396 | 97.46193208 | 77.0912 | 93.3852 | 93.0546 | 99.4318 | 98.9011 | 108.527 | 100.784 | 122.58  |
| 116.2873385 | 98.9144 | 107.28  | 87.3984 | 93.9312 | 102.051 | 114.407 | 64.1509 | 112.6903524 | 90.2531 | 99.8703 | 101.146 | 125     | 93.0834 | 124.031 | 97.4244 | 129.51  |
| 99.21764381 | 123.04  | 103.448 | 109.756 | 99.7294 | 106.553 | 106.78  | 98.1132 | 91.37055847 | 105.295 | 97.2763 | 103.169 | 93.75   | 100.84  | 65.8915 | 90.7055 | 95.2998 |
| 106.6856307 | 106.152 | 95.7854 | 101.626 | 103.208 | 99.0495 | 94.0678 | 105.66  | 94.4162407  | 80.8517 | 90.7912 | 109.238 | 99.4318 | 104.719 | 96.8992 | 97.4244 | 92.8562 |
| 94.95021234 | 107.358 | 95.7854 | 99.5935 | 102.049 | 97.5488 | 114.407 | 113.208 | 76.14213358 | 88.3728 | 102.464 | 91.0317 | 122.159 | 114.415 | 116.279 | 90.7055 | 85.5254 |
| 102.4182096 | 101.327 | 111.111 | 107.724 | 95.0908 | 99.0495 | 106.78  | 98.1132 | 100.5076143 | 112.816 | 105.058 | 95.0775 | 119.318 | 139.625 | 112.403 | 107.503 | 141.728 |
| 98.15077814 | 102.533 | 107.28  | 99.5935 | 106.687 | 109.555 | 101.695 | 120.755 | 88.32487623 | 103.415 | 102.464 | 103.169 | 122.159 | 81.448  | 120.155 | 87.346  | 134.397 |
| 99.21764381 | 96.5018 | 103.448 | 97.561  | 103.208 | 93.0465 | 96.6102 | 94.3396 | 115.7360438 | 90.8883 | 103.761 | 121.376 | 99.4318 | 96.9619 | 108.527 | 107.503 | 134.397 |
| 97.08392287 | 102.533 | 107.28  | 111.789 | 93.9312 | 85.5428 | 96.6102 | 105.66  | 106.5989879 | 90.8883 | 114.137 | 93.0546 | 102.273 | 93.0834 | 77.5194 | 94.0649 | 127.387 |
| 96.0170676  | 95.2955 | 99.6169 | 103.659 | 109.007 | 109.555 | 106.78  | 109.434 | 115.7360438 | 98.3078 | 103.761 | 103.169 | 76.7045 | 102.78  | 116.279 | 100.784 | 93.7375 |
| 102.4182096 | 97.7081 | 107.28  | 99.5935 | 103.208 | 96.048  | 96.6102 | 98.1132 | 106.5989879 | 107.582 | 105.058 | 113.284 | 99.4318 | 108.597 | 112.403 | 114.222 | 92.8562 |
| 99.21764381 | 103.739 | 99.6169 | 117.886 | 106.687 | 93.0465 | 106.78  | 101.887 | 100.5076143 | 105.727 | 114.137 | 99.1234 | 133.523 | 137.686 | 108.527 | 114.222 | 58.646  |
| 106.6856307 | 110.977 | 68.9655 | 103.659 | 103.208 | 102.051 | 104.237 | 94.3396 | 112.6903524 | 120.566 | 108.949 | 101.146 | 79.5455 | 87.2657 | 116.279 | 110.862 | 110.562 |
| 100.2844991 | 104.946 | 114.943 | 105.691 | 109.007 | 103.552 | 94.0678 | 94.3396 | 103.5532966 | 98.3078 | 97.2763 | 105.192 | 82.3864 | 106.658 | 112.403 | 107.503 | 134.597 |
| 96.0170676  | 100.121 | 103.448 | 101.626 | 103.208 | 97.5488 | 122.034 | 113.208 | 130.9644641 | 107.582 | 112.84  | 117.33  | 93.75   | 108.597 | 120.155 | 100.784 | 91.334  |
| 97.08392287 | 89.2642 | 99.6169 | 109.756 | 114.805 | 93.0465 | 99.1525 | 67.9245 | 100.5076143 | 98.3078 | 105.058 | 103.169 | 90.9091 | 96.9619 | 124.031 | 104.143 | 112.966 |
| 116.2873385 | 102.533 | 72.7969 | 83.3333 | 117.124 | 88.5443 | 106.78  | 79.2453 | 106.5989879 | 109.437 | 108.949 | 111.261 | 99.4318 | 77.5695 | 116.279 | 107.503 | 86.5269 |
| 211.2375508 | 199.035 | 264.206 | 221.545 | 208.986 | 154.577 | 251.695 | 240.533 | 127.9187819 | 196.616 | 169.909 | 232.637 | 178.977 | 281.189 | 305.761 | 265.398 | 232.14  |

|             |         |         |         |         |         |         |         |             |         |         |         |         |         |         |         |         |
|-------------|---------|---------|---------|---------|---------|---------|---------|-------------|---------|---------|---------|---------|---------|---------|---------|---------|
| 192.0341352 | 193.004 | 237.008 | 203.252 | 189.465 | 181.427 | 259.322 | 225.261 | 158.3756408 | 209.6   | 159.533 | 236.682 | 193.182 | 263.736 | 266.561 | 228.443 | 259.02  |
| 204.8364192 | 196.622 | 229.237 | 184.959 | 181.428 | 175.479 | 254.237 | 225.261 | 191.8781728 | 193.668 | 159.533 | 236.682 | 198.864 | 244.344 | 262.641 | 211.646 | 217.479 |
| 194.1678457 | 174.91  | 229.237 | 191.057 | 177.983 | 172.504 | 233.898 | 179.445 | 216.243649  | 212.471 | 160.83  | 228.591 | 187.5   | 242.405 | 266.561 | 184.77  | 249.246 |
| 183.4992931 | 200.241 | 248.664 | 209.35  | 188.317 | 168.043 | 216.102 | 167.991 | 201.0152286 | 224.438 | 147.86  | 206.339 | 144.886 | 230.769 | 274.401 | 218.365 | 173.494 |
| 192.0341352 | 180.941 | 233.123 | 203.252 | 163.055 | 176.966 | 233.898 | 198.535 | 228.4263962 | 220.729 | 151.751 | 224.545 | 187.5   | 242.405 | 258.721 | 194.849 | 285.899 |
| 177.0981615 | 180.941 | 229.237 | 199.187 | 174.538 | 191.837 | 246.61  | 194.717 | 213.1979759 | 218.874 | 151.751 | 194.201 | 210.227 | 223.012 | 250.881 | 184.77  | 171.051 |
| 181.3655825 | 189.385 | 233.123 | 184.959 | 186.021 | 182.914 | 244.068 | 206.171 | 222.3350317 | 233.713 | 158.236 | 182.063 | 196.023 | 244.344 | 250.881 | 208.287 | 261.463 |
| 178.1650167 | 188.179 | 198.154 | 178.862 | 179.131 | 179.94  | 246.61  | 206.171 | 225.3807048 | 226.293 | 162.127 | 194.201 | 204.545 | 213.316 | 262.641 | 164.614 | 210.148 |
| 170.6970091 | 190.591 | 237.008 | 193.089 | 172.241 | 185.888 | 238.983 | 209.989 | 201.0152286 | 226.293 | 154.345 | 200.27  | 187.5   | 232.708 | 250.881 | 178.052 | 180.825 |
| 173.8975853 | 185.766 | 209.811 | 174.797 | 180.279 | 173.992 | 238.983 | 194.717 | 188.8324814 | 217.019 | 154.345 | 192.178 | 176.136 | 248.222 | 270.481 | 188.13  | 193.043 |
| 185.6330036 | 190.591 | 248.664 | 162.602 | 179.131 | 176.966 | 238.983 | 206.171 | 213.1979759 | 218.874 | 156.939 | 220.499 | 159.091 | 226.891 | 266.561 | 191.489 | 266.351 |
| 172.83073   | 184.56  | 252.55  | 203.252 | 182.576 | 176.966 | 241.525 | 209.989 | 216.243649  | 224.438 | 150.454 | 222.522 | 181.818 | 217.195 | 250.881 | 201.568 | 215.035 |
| 179.231872  | 184.56  | 237.008 | 195.122 | 175.686 | 181.427 | 241.525 | 198.535 | 173.6040611 | 217.019 | 151.751 | 188.132 | 176.136 | 234.648 | 270.481 | 188.13  | 217.479 |
| 184.5661483 | 194.21  | 225.352 | 172.764 | 175.686 | 181.427 | 226.271 | 183.263 | 207.1065931 | 231.858 | 151.751 | 198.247 | 178.977 | 232.708 | 274.401 | 211.646 | 217.479 |
| 192.0341352 | 194.21  | 217.581 | 166.667 | 179.131 | 173.992 | 228.814 | 187.081 | 201.0152286 | 189.196 | 149.157 | 188.132 | 164.773 | 224.952 | 227.361 | 171.333 | 217.479 |
| 172.83073   | 196.622 | 217.581 | 184.959 | 175.686 | 181.427 | 211.017 | 175.627 | 207.1065931 | 209.6   | 153.048 | 192.178 | 170.455 | 224.952 | 235.201 | 198.208 | 215.035 |
| 192.0341352 | 195.416 | 217.581 | 186.992 | 177.983 | 176.966 | 228.814 | 202.353 | 210.1522845 | 215.164 | 142.672 | 184.086 | 190.341 | 217.195 | 235.201 | 191.489 | 215.035 |
| 167.4964433 | 189.385 | 237.008 | 199.187 | 184.872 | 179.94  | 236.441 | 187.081 | 197.9695373 | 213.309 | 151.751 | 194.201 | 181.818 | 215.255 | 274.401 | 198.208 | 190.6   |
| 172.83073   | 190.591 | 213.696 | 197.154 | 184.872 | 169.53  | 221.186 | 190.899 | 182.7411169 | 202.18  | 150.454 | 165.88  | 190.341 | 234.648 | 274.401 | 215.006 | 210.148 |
| 168.5632985 | 186.972 | 237.008 | 199.187 | 197.503 | 165.069 | 231.356 | 164.173 | 201.0152286 | 217.019 | 145.266 | 186.109 | 156.25  | 240.465 | 282.241 | 198.208 | 227.253 |
| 165.3627327 | 177.322 | 205.925 | 189.024 | 188.317 | 175.479 | 244.068 | 209.989 | 191.8781728 | 213.309 | 145.266 | 182.063 | 176.136 | 236.587 | 278.321 | 194.849 | 222.366 |
| 171.7638747 | 183.353 | 229.237 | 195.122 | 186.021 | 172.504 | 231.356 | 167.991 | 197.9695373 | 211.454 | 147.86  | 192.178 | 167.614 | 240.465 | 278.321 | 167.973 | 166.164 |
| 164.2958775 | 188.179 | 221.467 | 180.894 | 199.8   | 172.504 | 228.814 | 167.991 | 197.9695373 | 211.454 | 150.454 | 180.04  | 170.455 | 224.952 | 282.241 | 201.568 | 139.284 |
| 179.231872  | 176.116 | 213.696 | 180.894 | 202.096 | 171.017 | 241.525 | 187.081 | 185.7868083 | 209.6   | 147.86  | 188.132 | 187.5   | 217.195 | 266.561 | 191.489 | 210.148 |
| 169.6301538 | 171.291 | 217.581 | 182.927 | 189.465 | 168.043 | 244.068 | 187.081 | 197.9695373 | 207.745 | 154.345 | 186.109 | 190.341 | 244.344 | 286.161 | 204.927 | 273.681 |
| 172.83073   | 173.703 | 221.467 | 178.862 | 189.465 | 169.53  | 228.814 | 171.809 | 197.9695373 | 207.745 | 162.127 | 184.086 | 181.818 | 228.83  | 274.401 | 208.287 | 234.584 |
| 167.4964433 | 172.497 | 229.237 | 191.057 | 192.91  | 159.12  | 223.729 | 156.537 | 185.7868083 | 192.906 | 151.751 | 169.926 | 176.136 | 221.073 | 278.321 | 204.927 | 175.938 |
| 180.2987273 | 176.116 | 194.269 | 182.927 | 192.91  | 150.198 | 233.898 | 175.627 | 185.7868083 | 204.035 | 151.751 | 188.132 | 181.818 | 217.195 | 282.241 | 167.973 | 252.37  |

|             |         |         |         |         |         |         |         |             |         |         |         |         |         |         |         |         |
|-------------|---------|---------|---------|---------|---------|---------|---------|-------------|---------|---------|---------|---------|---------|---------|---------|---------|
| 168.5632985 | 170.084 | 209.811 | 182.927 | 195.207 | 163.582 | 216.102 | 152.719 | 197.9695373 | 220.729 | 159.533 | 184.086 | 164.773 | 221.073 | 305.761 | 208.287 | 278.809 |
| 182.4324378 | 164.053 | 221.467 | 191.057 | 189.465 | 147.224 | 216.102 | 145.083 | 204.06092   | 209.6   | 151.751 | 188.132 | 181.818 | 193.924 | 282.241 | 194.849 | 259.02  |
| 185.6330036 | 176.116 | 213.696 | 186.992 | 189.465 | 153.172 | 221.186 | 167.991 | 182.7411169 | 213.309 | 140.078 | 184.086 | 176.136 | 205.559 | 262.641 | 181.411 | 161.277 |
| 161.0953013 | 155.609 | 221.467 | 172.764 | 188.317 | 145.736 | 241.525 | 190.899 | 179.6954256 | 213.309 | 145.266 | 184.086 | 176.136 | 236.587 | 278.321 | 201.568 | 219.923 |
| 174.9644301 | 170.084 | 225.352 | 172.764 | 189.465 | 150.198 | 238.983 | 167.991 | 170.5583697 | 204.035 | 147.86  | 188.132 | 173.295 | 221.073 | 282.241 | 194.849 | 229.697 |
| 162.1621669 | 165.259 | 237.008 | 182.927 | 203.245 | 153.172 | 231.356 | 167.991 | 188.8324814 | 194.761 | 136.187 | 190.155 | 184.659 | 275.372 | 282.241 | 215.006 | 183.269 |
| 177.0981615 | 176.116 | 213.696 | 201.22  | 194.059 | 160.608 | 218.644 | 148.901 | 146.1928935 | 207.745 | 145.266 | 192.178 | 181.818 | 223.012 | 286.161 | 184.77  | 229.697 |
| 180.2987273 | 159.228 | 209.811 | 178.862 | 187.169 | 154.659 | 231.356 | 152.719 | 155.3299494 | 204.035 | 151.751 | 190.155 | 210.227 | 190.045 | 266.561 | 198.208 | 268.794 |
| 172.83073   | 171.291 | 209.811 | 172.764 | 203.245 | 156.146 | 241.525 | 187.081 | 173.6040611 | 196.616 | 146.563 | 190.155 | 173.295 | 193.924 | 258.721 | 235.162 | 190.6   |
| 181.3655825 | 164.053 | 209.811 | 186.992 | 180.279 | 153.172 | 221.186 | 160.355 | 179.6954256 | 205.89  | 143.969 | 182.063 | 153.409 | 215.255 | 294.001 | 174.692 | 188.156 |
| 173.8975853 | 164.053 | 205.925 | 164.634 | 198.652 | 156.146 | 264.407 | 206.171 | 152.2842672 | 196.616 | 151.751 | 180.04  | 150.568 | 211.377 | 309.681 | 191.489 | 207.705 |
| 171.7638747 | 170.084 | 209.811 | 186.992 | 196.355 | 144.249 | 246.61  | 179.445 | 170.5583697 | 200.325 | 147.86  | 184.086 | 136.364 | 190.045 | 239.121 | 188.13  | 229.697 |
| 160.028446  | 151.99  | 170.957 | 178.862 | 199.8   | 142.762 | 223.729 | 141.265 | 185.7868083 | 194.761 | 145.266 | 186.109 | 144.886 | 254.04  | 274.401 | 208.287 | 197.93  |
| 173.8975853 | 168.878 | 186.498 | 189.024 | 203.245 | 147.224 | 233.898 | 167.991 | 158.3756408 | 187.341 | 145.266 | 196.224 | 153.409 | 219.134 | 270.481 | 194.849 | 241.915 |
| 169.6301538 | 165.259 | 209.811 | 182.927 | 205.541 | 142.762 | 218.644 | 156.537 | 167.5126966 | 161.373 | 150.454 | 214.43  | 176.136 | 201.681 | 258.721 | 188.13  | 266.351 |
| 155.7610249 | 178.528 | 213.696 | 178.862 | 207.838 | 144.249 | 223.729 | 156.537 | 179.6954256 | 187.341 | 154.345 | 200.27  | 187.5   | 223.012 | 258.721 | 181.411 | 207.705 |
| 170.6970091 | 176.116 | 194.269 | 186.992 | 181.428 | 142.762 | 241.525 | 175.627 | 188.8324814 | 185.486 | 141.375 | 200.27  | 167.614 | 221.073 | 278.321 | 194.849 | 232.14  |
| 172.83073   | 162.847 | 186.498 | 182.927 | 200.948 | 142.762 | 228.814 | 164.173 | 170.5583697 | 198.47  | 147.86  | 210.384 | 170.455 | 215.255 | 258.721 | 191.489 | 197.93  |
| 169.6301538 | 176.116 | 190.384 | 170.732 | 212.431 | 150.198 | 244.068 | 179.445 | 137.0558377 | 200.325 | 141.375 | 194.201 | 170.455 | 159.017 | 297.921 | 191.489 | 156.389 |
| 169.6301538 | 159.228 | 182.613 | 182.927 | 203.245 | 151.685 | 221.186 | 148.901 | 149.2385758 | 196.616 | 143.969 | 206.339 | 164.773 | 207.498 | 235.201 | 194.849 | 217.479 |
| 171.7638747 | 167.672 | 213.696 | 158.537 | 197.503 | 153.172 | 246.61  | 179.445 | 179.6954256 | 191.051 | 143.969 | 202.293 | 122.159 | 205.559 | 243.041 | 188.13  | 285.899 |
| 162.1621669 | 165.259 | 213.696 | 152.439 | 197.503 | 154.659 | 221.186 | 171.809 | 140.1015199 | 198.47  | 151.751 | 188.132 | 161.932 | 205.559 | 258.721 | 188.13  | 153.946 |
| 165.3627327 | 155.609 | 221.467 | 172.764 | 195.207 | 153.172 | 244.068 | 187.081 | 179.6954256 | 196.616 | 141.375 | 196.224 | 147.727 | 209.438 | 219.521 | 184.77  | 215.035 |
| 167.4964433 | 155.609 | 202.04  | 164.634 | 191.762 | 144.249 | 231.356 | 167.991 | 173.6040611 | 202.18  | 146.563 | 186.109 | 164.773 | 213.316 | 223.441 | 188.13  | 266.351 |
| 166.429588  | 150.784 | 225.352 | 154.472 | 198.652 | 130.865 | 254.237 | 187.081 | 140.1015199 | 194.761 | 146.563 | 198.247 | 161.932 | 232.708 | 231.281 | 181.411 | 261.463 |
| 153.6273144 | 142.34  | 217.581 | 176.829 | 188.317 | 138.301 | 231.356 | 171.809 | 146.1928935 | 176.212 | 146.563 | 192.178 | 159.091 | 226.891 | 211.681 | 161.254 | 278.569 |
| 156.8278802 | 144.753 | 202.04  | 158.537 | 199.8   | 138.301 | 246.61  | 190.899 | 152.2842672 | 185.486 | 155.642 | 196.224 | 193.182 | 201.681 | 262.641 | 204.927 | 197.93  |
| 155.7610249 | 139.928 | 202.04  | 160.569 | 207.838 | 139.788 | 233.898 | 183.263 | 167.5126966 | 183.631 | 145.266 | 196.224 | 156.25  | 213.316 | 223.441 | 188.13  | 207.705 |

|             |         |         |         |         |         |         |         |             |         |         |         |         |         |         |         |         |
|-------------|---------|---------|---------|---------|---------|---------|---------|-------------|---------|---------|---------|---------|---------|---------|---------|---------|
| 155.7610249 | 143.546 | 190.384 | 170.732 | 203.245 | 136.814 | 226.271 | 160.355 | 167.5126966 | 189.196 | 138.781 | 204.316 | 153.409 | 219.134 | 219.521 | 191.489 | 276.125 |
| 164.2958775 | 148.372 | 205.925 | 170.732 | 208.986 | 138.301 | 231.356 | 190.899 | 185.7868083 | 172.502 | 146.563 | 178.018 | 156.25  | 209.438 | 219.521 | 201.568 | 207.705 |
| 157.8947355 | 141.134 | 217.581 | 166.667 | 195.207 | 136.814 | 233.898 | 179.445 | 161.4213139 | 179.922 | 145.266 | 198.247 | 153.409 | 223.012 | 203.841 | 174.692 | 202.817 |
| 158.9615907 | 132.69  | 194.269 | 152.439 | 204.393 | 139.788 | 233.898 | 148.901 | 155.3299494 | 187.341 | 146.563 | 196.224 | 181.818 | 203.62  | 215.601 | 157.895 | 315.222 |
| 157.8947355 | 130.277 | 217.581 | 146.341 | 217.024 | 138.301 | 246.61  | 171.809 | 164.4670052 | 187.341 | 142.672 | 194.201 | 187.5   | 215.255 | 227.361 | 198.208 | 210.148 |
| 164.2958775 | 136.309 | 209.811 | 162.602 | 200.948 | 142.762 | 264.407 | 209.989 | 146.1928935 | 187.341 | 150.454 | 200.27  | 164.773 | 217.195 | 215.601 | 184.77  | 215.035 |
| 158.9615907 | 125.452 | 198.154 | 156.504 | 194.059 | 136.814 | 256.78  | 202.353 | 158.3756408 | 192.906 | 136.187 | 194.201 | 173.295 | 252.101 | 207.761 | 188.13  | 183.269 |
| 152.5604591 | 137.515 | 194.269 | 164.634 | 207.838 | 145.736 | 218.644 | 145.083 | 149.2385758 | 204.035 | 146.563 | 198.247 | 153.409 | 263.736 | 207.761 | 194.849 | 237.028 |
| 152.5604591 | 136.309 | 190.384 | 170.732 | 171.093 | 151.685 | 251.695 | 183.263 | 164.4670052 | 192.906 | 140.078 | 192.178 | 190.341 | 223.012 | 192.081 | 191.489 | 278.569 |
| 162.1621669 | 121.834 | 205.925 | 142.276 | 166.5   | 145.736 | 226.271 | 145.083 | 146.1928935 | 189.196 | 138.781 | 204.316 | 193.182 | 223.012 | 199.921 | 194.849 | 273.681 |
| 148.2930277 | 136.309 | 205.925 | 142.276 | 163.055 | 144.249 | 211.017 | 133.629 | 161.4213139 | 207.745 | 146.563 | 198.247 | 181.818 | 207.498 | 192.081 | 225.084 | 193.043 |
| 163.2290222 | 126.659 | 198.154 | 158.537 | 164.203 | 141.275 | 238.983 | 148.901 | 158.3756408 | 196.616 | 142.672 | 206.339 | 153.409 | 244.344 | 164.641 | 221.725 | 227.253 |
| 144.0256066 | 138.721 | 202.04  | 148.374 | 161.907 | 144.249 | 238.983 | 171.809 | 158.3756408 | 196.616 | 145.266 | 210.384 | 144.886 | 236.587 | 152.881 | 188.13  | 232.14  |
| 162.1621669 | 142.34  | 198.154 | 160.569 | 187.169 | 144.249 | 236.441 | 152.719 | 185.7868083 | 198.47  | 142.672 | 214.43  | 142.045 | 228.83  | 199.921 | 174.692 | 256.576 |
| 146.1593171 | 125.452 | 205.925 | 168.699 | 177.983 | 150.198 | 236.441 | 167.991 | 170.5583697 | 183.631 | 146.563 | 204.316 | 178.977 | 164.835 | 235.201 | 201.568 | 283.456 |
| 154.6941697 | 133.896 | 194.269 | 152.439 | 181.428 | 142.762 | 244.068 | 160.355 | 143.1472113 | 179.922 | 133.593 | 206.339 | 173.295 | 221.073 | 199.921 | 151.176 | 202.817 |
| 161.0953013 | 150.784 | 182.613 | 144.309 | 198.652 | 139.788 | 261.864 | 183.263 | 149.2385758 | 189.196 | 137.484 | 198.247 | 176.136 | 219.134 | 207.761 | 194.849 | 197.93  |
| 156.8278802 | 138.721 | 198.154 | 144.309 | 191.762 | 145.736 | 221.186 | 141.265 | 164.4670052 | 211.454 | 137.484 | 202.293 | 196.023 | 182.288 | 199.921 | 181.411 | 217.479 |
| 145.0924619 | 137.515 | 190.384 | 142.276 | 194.059 | 142.762 | 236.441 | 175.627 | 146.1928935 | 228.148 | 136.187 | 194.201 | 156.25  | 221.073 | 184.241 | 174.692 | 251.689 |
| 162.1621669 | 156.815 | 182.613 | 156.504 | 194.059 | 142.762 | 236.441 | 164.173 | 161.4213139 | 189.196 | 136.187 | 208.361 | 125     | 221.073 | 215.601 | 174.692 | 210.148 |
| 165.3627327 | 151.99  | 178.728 | 148.374 | 206.69  | 133.84  | 244.068 | 171.809 | 140.1015199 | 198.47  | 151.751 | 206.339 | 156.25  | 203.62  | 192.081 | 164.614 | 273.681 |
| 173.8975853 | 158.022 | 194.269 | 174.797 | 203.245 | 139.788 | 238.983 | 137.447 | 124.8730996 | 204.035 | 140.078 | 216.453 | 150.568 | 174.531 | 223.441 | 174.692 | 188.156 |
| 170.6970091 | 162.847 | 205.925 | 154.472 | 190.614 | 136.814 | 241.525 | 167.991 | 140.1015199 | 191.051 | 151.751 | 210.384 | 144.886 | 199.741 | 192.081 | 174.692 | 256.576 |
| 162.1621669 | 165.259 | 186.498 | 174.797 | 196.355 | 141.275 | 244.068 | 167.991 | 176.6497525 | 170.647 | 142.672 | 198.247 | 122.159 | 246.283 | 188.161 | 171.333 | 175.938 |
| 162.1621669 | 164.053 | 202.04  | 138.211 | 191.762 | 136.814 | 238.983 | 160.355 | 170.5583697 | 196.616 | 140.078 | 210.384 | 139.205 | 238.526 | 203.841 | 181.411 | 256.576 |
| 169.6301538 | 144.753 | 186.498 | 154.472 | 191.762 | 144.249 | 238.983 | 171.809 | 167.5126966 | 183.631 | 140.078 | 210.384 | 144.886 | 215.255 | 192.081 | 178.052 | 185.712 |
| 164.2958775 | 144.753 | 221.467 | 160.569 | 205.541 | 126.404 | 254.237 | 167.991 | 158.3756408 | 189.196 | 151.751 | 214.43  | 133.523 | 213.316 | 192.081 | 164.614 | 200.374 |
| 151.4936039 | 161.641 | 151.53  | 142.276 | 190.614 | 138.301 | 238.983 | 152.719 | 170.5583697 | 207.745 | 141.375 | 210.384 | 122.159 | 236.587 | 199.921 | 161.254 | 205.261 |

|             |         |         |         |         |         |         |         |             |         |         |         |         |         |         |         |         |
|-------------|---------|---------|---------|---------|---------|---------|---------|-------------|---------|---------|---------|---------|---------|---------|---------|---------|
| 162.1621669 | 143.546 | 202.04  | 162.602 | 195.207 | 124.917 | 236.441 | 141.265 | 170.5583697 | 187.341 | 132.296 | 210.384 | 142.045 | 211.377 | 184.241 | 157.895 | 207.705 |
| 149.3598829 | 148.372 | 170.957 | 150.407 | 206.69  | 135.327 | 226.271 | 148.901 | 164.4670052 | 192.906 | 143.969 | 208.361 | 144.886 | 215.255 | 223.441 | 161.254 | 298.117 |
| 160.028446  | 159.228 | 170.957 | 148.374 | 200.948 | 144.249 | 221.186 | 145.083 | 152.2842672 | 191.051 | 138.781 | 200.27  | 153.409 | 217.195 | 203.841 | 164.614 | 283.456 |
| 158.9615907 | 149.578 | 186.498 | 168.699 | 206.69  | 132.353 | 249.153 | 175.627 | 164.4670052 | 200.325 | 137.484 | 188.132 | 164.773 | 213.316 | 203.841 | 167.973 | 215.035 |
| 151.4936039 | 162.847 | 190.384 | 168.699 | 203.245 | 130.865 | 241.525 | 160.355 | 164.4670052 | 198.47  | 128.405 | 208.361 | 142.045 | 215.255 | 211.681 | 161.254 | 244.358 |
| 164.2958775 | 156.815 | 198.154 | 168.699 | 208.986 | 133.84  | 251.695 | 187.081 | 170.5583697 | 196.616 | 138.781 | 206.339 | 156.25  | 213.316 | 196.001 | 164.614 | 234.584 |
| 156.8278802 | 156.815 | 186.498 | 176.829 | 221.617 | 135.327 | 221.186 | 194.717 | 155.3299494 | 207.745 | 133.593 | 210.384 | 119.318 | 213.316 | 199.921 | 164.614 | 180.825 |
| 153.6273144 | 160.434 | 163.186 | 174.797 | 210.134 | 133.84  | 249.153 | 148.901 | 191.8781728 | 198.47  | 133.593 | 206.339 | 142.045 | 217.195 | 192.081 | 157.895 | 237.028 |
| 155.7610249 | 159.228 | 174.842 | 176.829 | 211.283 | 139.788 | 233.898 | 183.263 | 197.9695373 | 196.616 | 130.999 | 210.384 | 142.045 | 215.255 | 219.521 | 161.254 | 139.284 |
| 166.429588  | 171.291 | 167.071 | 178.862 | 211.283 | 141.275 | 259.322 | 179.445 | 167.5126966 | 198.47  | 134.89  | 214.43  | 136.364 | 215.255 | 156.801 | 184.77  | 228.335 |
| 152.5604591 | 171.291 | 182.613 | 184.959 | 211.283 | 141.275 | 246.61  | 156.537 | 173.6040611 | 196.616 | 137.484 | 194.201 | 139.205 | 236.587 | 211.681 | 174.692 | 194.686 |
| 157.8947355 | 161.641 | 205.925 | 178.862 | 189.465 | 145.736 | 261.864 | 171.809 | 185.7868083 | 183.631 | 136.187 | 206.339 | 133.523 | 211.377 | 192.081 | 161.254 | 302.844 |
| 148.2930277 | 162.847 | 170.957 | 174.797 | 207.838 | 148.711 | 266.949 | 175.627 | 143.1472113 | 187.341 | 138.781 | 192.178 | 136.364 | 199.741 | 199.921 | 167.973 | 225.931 |
| 146.1593171 | 162.847 | 194.269 | 162.602 | 202.096 | 151.685 | 256.78  | 187.081 | 176.6497525 | 200.325 | 143.969 | 210.384 | 147.727 | 211.377 | 196.001 | 181.411 | 274.002 |
| 170.6970091 | 151.99  | 182.613 | 170.732 | 206.69  | 141.275 | 228.814 | 206.171 | 167.5126966 | 191.051 | 151.751 | 228.591 | 127.841 | 244.344 | 188.161 | 164.614 | 201.896 |
| 157.8947355 | 168.878 | 186.498 | 172.764 | 195.207 | 139.788 | 238.983 | 206.171 | 167.5126966 | 194.761 | 140.078 | 220.499 | 116.477 | 182.288 | 184.241 | 167.973 | 221.124 |
| 157.8947355 | 153.197 | 147.644 | 168.699 | 196.355 | 139.788 | 264.407 | 145.083 | 179.6954256 | 192.906 | 138.781 | 210.384 | 122.159 | 205.559 | 207.761 | 174.692 | 218.721 |
| 152.5604591 | 171.291 | 186.498 | 176.829 | 215.876 | 147.224 | 236.441 | 175.627 | 179.6954256 | 213.309 | 140.078 | 208.361 | 127.841 | 191.984 | 192.081 | 164.614 | 225.931 |
| 160.028446  | 155.609 | 182.613 | 178.862 | 174.538 | 147.224 | 256.78  | 209.989 | 164.4670052 | 200.325 | 136.187 | 230.614 | 122.159 | 199.741 | 192.081 | 167.973 | 225.931 |
| 145.0924619 | 162.847 | 182.613 | 180.894 | 198.652 | 141.275 | 266.949 | 171.809 | 158.3756408 | 215.164 | 133.593 | 214.43  | 116.477 | 209.438 | 199.921 | 154.535 | 173.054 |
| 161.0953013 | 165.259 | 190.384 | 154.472 | 195.207 | 138.301 | 251.695 | 175.627 | 146.1928935 | 213.309 | 137.484 | 182.063 | 96.5909 | 219.134 | 184.241 | 184.77  | 223.528 |
| 168.5632985 | 155.609 | 194.269 | 154.472 | 219.321 | 139.788 | 241.525 | 213.807 | 155.3299494 | 189.196 | 137.484 | 216.453 | 107.955 | 213.316 | 160.721 | 167.973 | 216.317 |
| 149.3598829 | 151.99  | 155.415 | 154.472 | 211.283 | 130.865 | 238.983 | 190.899 | 155.3299494 | 200.325 | 125.811 | 206.339 | 102.273 | 213.316 | 188.161 | 157.895 | 173.054 |
| 158.9615907 | 142.34  | 167.071 | 146.341 | 213.579 | 138.301 | 226.271 | 171.809 | 155.3299494 | 168.793 | 137.484 | 216.453 | 93.75   | 201.681 | 184.241 | 147.816 | 177.861 |
| 155.7610249 | 160.434 | 167.071 | 162.602 | 204.393 | 133.84  | 233.898 | 183.263 | 161.4213139 | 192.906 | 137.484 | 218.476 | 105.114 | 197.802 | 207.761 | 167.973 | 247.563 |
| 162.1621669 | 159.228 | 182.613 | 176.829 | 207.838 | 142.762 | 233.898 | 167.991 | 158.3756408 | 181.777 | 136.187 | 208.361 | 105.114 | 215.255 | 184.241 | 157.895 | 187.475 |
| 156.8278802 | 171.291 | 186.498 | 164.634 | 207.838 | 142.762 | 241.525 | 167.991 | 161.4213139 | 166.938 | 129.702 | 216.453 | 102.273 | 217.195 | 184.241 | 154.535 | 221.124 |
| 162.1621669 | 160.434 | 190.384 | 168.699 | 202.096 | 144.249 | 236.441 | 167.991 | 167.5126966 | 187.341 | 140.078 | 208.361 | 85.2273 | 193.924 | 188.161 | 171.333 | 269.195 |

|             |         |         |         |         |         |         |         |             |         |         |         |         |         |         |         |         |
|-------------|---------|---------|---------|---------|---------|---------|---------|-------------|---------|---------|---------|---------|---------|---------|---------|---------|
| 165.3627327 | 159.228 | 178.728 | 174.797 | 197.503 | 145.736 | 236.441 | 183.263 | 146.1928935 | 176.212 | 141.375 | 222.522 | 76.7045 | 199.741 | 203.841 | 154.535 | 242.756 |
| 162.1621669 | 153.197 | 190.384 | 172.764 | 198.652 | 141.275 | 256.78  | 164.173 | 164.4670052 | 187.341 | 136.187 | 212.407 | 88.0682 | 197.802 | 172.481 | 141.097 | 194.686 |
| 156.8278802 | 156.815 | 132.103 | 180.894 | 198.652 | 144.249 | 236.441 | 175.627 | 152.2842672 | 181.777 | 127.108 | 208.361 | 99.4318 | 201.681 | 180.321 | 164.614 | 225.931 |
| 151.4936039 | 150.784 | 217.581 | 160.569 | 194.059 | 138.301 | 246.61  | 206.171 | 146.1928935 | 168.793 | 127.108 | 210.384 | 82.3864 | 205.559 | 184.241 | 164.614 | 300.441 |
| 150.4267382 | 165.259 | 170.957 | 152.439 | 198.652 | 141.275 | 238.983 | 164.173 | 161.4213139 | 176.212 | 136.187 | 178.018 | 79.5455 | 201.681 | 160.721 | 157.895 | 199.493 |
| 156.8278802 | 150.784 | 178.728 | 158.537 | 186.021 | 145.736 | 231.356 | 190.899 | 176.6497525 | 168.793 | 127.108 | 171.949 | 90.9091 | 217.195 | 172.481 | 161.254 | 240.353 |
| 155.7610249 | 161.641 | 170.957 | 144.309 | 194.059 | 151.685 | 236.441 | 183.263 | 152.2842672 | 191.051 | 133.593 | 182.063 | 105.114 | 191.984 | 160.721 | 157.895 | 266.791 |

MI+SD-208

|         |         |         |         |         |         |         |         |         |         |         |         |         |         |         |         |
|---------|---------|---------|---------|---------|---------|---------|---------|---------|---------|---------|---------|---------|---------|---------|---------|
| 89.33   | 80.9717 | 89.5522 | 96.3773 | 93.2358 | 114.202 | 91.2095 | 97.5395 | 106.047 | 98.4849 | 97.5779 | 102.484 | 101.329 | 90.6149 | 82.5226 | 95.4712 |
| 111.663 | 117.409 | 106.774 | 108.681 | 115.174 | 113.104 | 83.2783 | 105.448 | 86.5116 | 68.1818 | 97.5779 | 116.46  | 89.4718 | 93.2039 | 110.27  | 89.9633 |
| 91.8114 | 97.166  | 103.33  | 100.478 | 104.205 | 107.613 | 92.2009 | 118.629 | 108.837 | 75.7576 | 101.73  | 107.143 | 103.485 | 98.3819 | 91.5315 | 75.2754 |
| 116.625 | 80.9717 | 92.9966 | 102.529 | 109.689 | 109.81  | 92.2009 | 105.448 | 114.419 | 94.697  | 91.3495 | 83.8509 | 101.329 | 77.6699 | 94.054  | 78.9474 |
| 91.8114 | 105.263 | 99.8852 | 96.3773 | 95.9781 | 113.104 | 92.2009 | 105.448 | 117.209 | 106.061 | 101.73  | 88.5093 | 115.343 | 82.8479 | 86.8468 | 84.4553 |
| 96.7742 | 89.0688 | 92.9966 | 102.529 | 95.9781 | 87.8477 | 93.1923 | 108.084 | 86.5116 | 94.697  | 116.263 | 102.484 | 83.004  | 75.0809 | 100.18  | 86.2913 |
| 86.8486 | 80.9717 | 92.9966 | 100.478 | 76.7825 | 106.515 | 96.1666 | 108.084 | 72.5581 | 102.273 | 99.654  | 135.093 | 95.9396 | 121.683 | 106.667 | 77.1114 |
| 81.8859 | 113.36  | 96.4409 | 96.3773 | 101.463 | 105.417 | 98.1494 | 105.448 | 114.419 | 90.9091 | 93.4256 | 116.46  | 88.3938 | 82.8479 | 90.8108 | 128.519 |
| 91.8114 | 93.1174 | 120.551 | 108.681 | 106.947 | 105.417 | 102.115 | 105.448 | 83.7209 | 98.4849 | 91.3495 | 60.559  | 102.407 | 88.0259 | 97.2973 | 95.4712 |
| 96.7742 | 101.215 | 61.9977 | 90.2256 | 93.2358 | 110.908 | 107.072 | 97.5395 | 86.5116 | 71.9697 | 93.4256 | 88.5093 | 95.9396 | 113.916 | 107.387 | 91.7993 |
| 81.8859 | 105.263 | 82.6636 | 77.9221 | 104.205 | 117.496 | 102.115 | 121.265 | 78.1395 | 79.5455 | 122.491 | 79.1925 | 94.8617 | 95.7929 | 110.991 | 84.4553 |
| 89.33   | 105.263 | 99.8852 | 100.478 | 120.658 | 101.025 | 87.2439 | 115.993 | 89.3023 | 94.697  | 112.111 | 93.1677 | 92.7057 | 98.3819 | 110.27  | 53.2436 |
| 96.7742 | 101.215 | 96.4409 | 106.63  | 93.2358 | 103.221 | 99.1408 | 108.084 | 120     | 98.4849 | 107.958 | 102.484 | 89.4718 | 93.2039 | 88.2883 | 84.4553 |
| 94.2928 | 89.0688 | 99.8852 | 102.529 | 115.174 | 103.221 | 98.1494 | 102.812 | 100.465 | 121.212 | 114.187 | 93.1677 | 102.407 | 95.7929 | 114.955 | 97.3072 |
| 84.3672 | 105.263 | 134.328 | 112.782 | 131.627 | 80.1611 | 92.2009 | 108.084 | 111.628 | 128.788 | 101.73  | 125.776 | 94.8617 | 111.327 | 104.144 | 126.683 |
| 104.218 | 89.0688 | 137.773 | 104.58  | 71.298  | 84.5534 | 104.098 | 100.176 | 122.791 | 125     | 80.9689 | 79.1925 | 97.0176 | 113.916 | 107.387 | 95.4712 |
| 104.218 | 101.215 | 75.775  | 92.2761 | 90.4936 | 97.7306 | 105.089 | 86.9947 | 117.209 | 109.848 | 99.654  | 111.801 | 98.0956 | 98.3819 | 89.009  | 82.6193 |
| 99.2556 | 105.263 | 75.775  | 77.9221 | 98.7203 | 90.0439 | 106.081 | 102.812 | 78.1395 | 109.848 | 124.567 | 97.8261 | 91.6277 | 121.683 | 109.189 | 91.7993 |
| 101.737 | 76.9231 | 120.551 | 110.731 | 101.463 | 86.7496 | 99.1408 | 92.2671 | 89.3023 | 113.636 | 85.1211 | 79.1925 | 104.563 | 103.56  | 105.946 | 130.355 |
| 126.551 | 117.409 | 103.33  | 104.58  | 87.7514 | 93.3382 | 102.115 | 81.7223 | 94.8837 | 106.061 | 95.5017 | 130.435 | 109.953 | 121.683 | 109.55  | 88.1273 |
| 89.33   | 97.166  | 106.774 | 100.478 | 106.947 | 88.9458 | 93.1923 | 76.4499 | 86.5116 | 106.061 | 99.654  | 125.776 | 99.1736 | 95.7929 | 120     | 119.339 |
| 119.107 | 109.312 | 103.33  | 104.58  | 82.2669 | 102.123 | 93.1923 | 81.7223 | 92.093  | 102.273 | 74.7405 | 102.484 | 105.641 | 113.916 | 89.7296 | 139.535 |
| 101.737 | 125.506 | 99.8852 | 92.2761 | 109.689 | 93.3382 | 112.029 | 79.0861 | 97.6744 | 87.1212 | 101.73  | 97.8261 | 108.875 | 108.738 | 98.0179 | 123.011 |
| 116.625 | 101.215 | 96.4409 | 106.63  | 106.947 | 103.221 | 112.029 | 102.812 | 94.8837 | 102.273 | 97.5779 | 102.484 | 114.265 | 103.56  | 90.09   | 128.519 |
| 111.663 | 72.8745 | 103.33  | 98.4279 | 98.7203 | 102.123 | 109.055 | 100.176 | 111.628 | 102.273 | 93.4256 | 107.143 | 94.8617 | 113.916 | 105.225 | 119.339 |
| 116.625 | 133.603 | 89.5522 | 96.3773 | 109.689 | 104.319 | 109.055 | 102.812 | 106.047 | 109.848 | 105.882 | 51.2422 | 94.8617 | 111.327 | 87.2073 | 82.6193 |
| 99.2556 | 76.9231 | 99.8852 | 102.529 | 87.7514 | 88.9458 | 106.081 | 84.3585 | 111.628 | 109.848 | 101.73  | 125.776 | 113.187 | 113.916 | 109.549 | 110.159 |
| 99.2556 | 113.36  | 110.218 | 108.681 | 95.9781 | 98.8287 | 107.072 | 110.721 | 86.5116 | 117.424 | 97.5779 | 102.484 | 109.953 | 103.56  | 98.0181 | 115.667 |
| 106.7   | 113.36  | 113.662 | 104.58  | 98.7203 | 95.5344 | 113.02  | 94.9033 | 108.837 | 68.1818 | 91.3495 | 102.484 | 99.1736 | 85.4369 | 80      | 99.1432 |
| 101.737 | 101.215 | 92.9966 | 92.2761 | 95.9781 | 91.142  | 102.115 | 89.6309 | 125.581 | 106.061 | 107.958 | 88.5093 | 107.797 | 108.738 | 104.865 | 124.847 |
| 205.955 | 254.19  | 197.176 | 156.998 | 191.956 | 230.6   | 258.757 | 239.895 | 309.767 | 276.515 | 267.82  | 149.068 | 238.232 | 223.209 | 148.523 | 414.933 |

|         |         |         |         |         |         |         |         |         |         |         |         |         |         |         |         |
|---------|---------|---------|---------|---------|---------|---------|---------|---------|---------|---------|---------|---------|---------|---------|---------|
| 220.844 | 184.492 | 156.381 | 133.971 | 230.347 | 262.021 | 243.886 | 239.895 | 301.395 | 246.212 | 298.962 | 177.019 | 231.764 | 199.575 | 158.4   | 372.705 |
| 210.918 | 213.191 | 173.379 | 167.464 | 202.925 | 258.759 | 241.223 | 237.258 | 315.349 | 242.424 | 282.353 | 204.969 | 244.7   | 202.201 | 140.475 | 394.737 |
| 218.362 | 217.291 | 186.977 | 169.557 | 186.472 | 260.934 | 234.387 | 237.258 | 295.814 | 261.364 | 276.125 | 177.019 | 224.218 | 194.323 | 163.888 | 374.541 |
| 198.511 | 213.191 | 183.578 | 173.744 | 186.472 | 260.934 | 245.129 | 247.803 | 290.233 | 280.303 | 269.896 | 218.944 | 237.154 | 186.445 | 145.597 | 335.985 |
| 193.548 | 196.792 | 183.578 | 163.278 | 202.925 | 257.672 | 233.41  | 234.622 | 326.512 | 272.727 | 274.048 | 223.602 | 246.856 | 181.193 | 151.815 | 335.985 |
| 203.474 | 225.491 | 173.379 | 177.931 | 202.925 | 260.934 | 224.62  | 224.077 | 315.349 | 219.697 | 284.429 | 237.578 | 250.09  | 215.331 | 142.67  | 335.985 |
| 208.437 | 229.591 | 166.58  | 171.651 | 219.378 | 258.759 | 218.761 | 234.622 | 315.349 | 257.576 | 286.505 | 237.578 | 230.686 | 186.445 | 158.4   | 385.557 |
| 203.474 | 221.391 | 197.176 | 173.744 | 211.152 | 259.847 | 229.015 | 231.986 | 301.395 | 231.061 | 284.429 | 232.919 | 256.558 | 204.827 | 146.328 | 358.017 |
| 223.325 | 204.992 | 193.776 | 175.837 | 202.925 | 248.974 | 235.955 | 218.805 | 298.605 | 246.212 | 269.896 | 251.553 | 254.402 | 191.697 | 150.718 | 365.361 |
| 208.437 | 204.992 | 197.176 | 163.278 | 183.729 | 218.521 | 229.015 | 239.895 | 284.651 | 250     | 240.83  | 242.236 | 245.778 | 178.567 | 134.622 | 365.361 |
| 225.806 | 209.091 | 200.576 | 177.931 | 186.472 | 250.062 | 230.998 | 218.805 | 287.442 | 246.212 | 263.668 | 228.261 | 244.7   | 207.453 | 141.573 | 350.673 |
| 205.955 | 192.692 | 203.975 | 171.651 | 191.956 | 262.021 | 209.187 | 231.986 | 301.395 | 250     | 274.048 | 223.602 | 249.012 | 191.697 | 144.499 | 370.869 |
| 210.918 | 196.792 | 197.176 | 175.837 | 222.121 | 273.981 | 204.23  | 226.714 | 301.395 | 265.152 | 253.287 | 228.261 | 254.402 | 194.323 | 114.502 | 348.837 |
| 181.141 | 221.391 | 193.776 | 167.464 | 200.183 | 262.021 | 201.256 | 216.169 | 293.023 | 227.273 | 271.972 | 214.286 | 246.856 | 162.811 | 135.719 | 317.625 |
| 200.993 | 217.291 | 200.576 | 171.651 | 202.925 | 273.981 | 197.29  | 213.533 | 284.651 | 257.576 | 278.201 | 237.578 | 240.388 | 196.949 | 153.279 | 308.446 |
| 186.104 | 241.89  | 180.178 | 165.371 | 216.636 | 280.504 | 201.256 | 187.17  | 270.698 | 265.152 | 263.668 | 195.652 | 241.466 | 189.071 | 144.865 | 299.266 |
| 183.623 | 237.79  | 186.977 | 163.278 | 186.472 | 268.544 | 187.376 | 218.805 | 298.605 | 238.636 | 242.907 | 237.578 | 242.544 | 199.575 | 127.671 | 304.774 |
| 208.437 | 188.592 | 180.178 | 163.278 | 235.832 | 258.759 | 192.333 | 200.351 | 290.233 | 227.273 | 249.135 | 232.919 | 243.622 | 173.315 | 124.745 | 291.922 |
| 183.623 | 225.491 | 180.178 | 163.278 | 194.698 | 257.672 | 207.204 | 213.533 | 293.023 | 242.424 | 259.516 | 218.944 | 228.53  | 175.941 | 150.352 | 297.43  |
| 208.437 | 221.391 | 180.178 | 159.091 | 194.698 | 259.847 | 215.135 | 221.441 | 284.651 | 242.424 | 232.526 | 214.286 | 229.608 | 189.071 | 137.914 | 334.735 |
| 171.216 | 188.592 | 163.18  | 159.091 | 227.605 | 272.893 | 214.144 | 216.169 | 315.349 | 223.485 | 244.983 | 186.335 | 219.907 | 189.071 | 137.914 | 311.213 |
| 181.141 | 184.492 | 186.977 | 154.904 | 208.41  | 271.23  | 207.204 | 224.077 | 295.814 | 227.273 | 274.048 | 204.969 | 224.218 | 194.323 | 113.039 | 331.116 |
| 178.66  | 184.492 | 190.377 | 163.278 | 202.925 | 255.857 | 207.204 | 195.079 | 279.07  | 234.848 | 263.668 | 209.627 | 225.296 | 175.941 | 155.839 | 354.638 |
| 176.179 | 213.191 | 183.578 | 166.097 | 211.152 | 250.366 | 207.204 | 208.26  | 298.605 | 200.758 | 244.983 | 204.969 | 224.218 | 181.193 | 141.938 | 325.688 |
| 193.548 | 192.692 | 166.58  | 166.097 | 208.41  | 265.739 | 209.187 | 205.624 | 293.023 | 227.273 | 247.059 | 214.286 | 225.296 | 160.185 | 129.5   | 322.069 |
| 181.141 | 180.393 | 159.781 | 176.35  | 194.698 | 262.445 | 220.093 | 197.715 | 281.86  | 250     | 251.211 | 237.578 | 242.544 | 186.445 | 143.036 | 358.257 |
| 171.216 | 229.591 | 197.176 | 166.097 | 222.121 | 261.347 | 203.239 | 197.715 | 315.349 | 238.636 | 263.668 | 214.286 | 258.714 | 194.323 | 154.01  | 358.257 |
| 171.216 | 225.491 | 180.178 | 166.097 | 216.636 | 250.366 | 202.247 | 176.626 | 301.395 | 234.848 | 259.516 | 214.286 | 252.246 | 191.697 | 140.109 | 396.254 |



|         |         |         |         |         |         |         |         |         |         |         |         |         |         |         |         |
|---------|---------|---------|---------|---------|---------|---------|---------|---------|---------|---------|---------|---------|---------|---------|---------|
| 173.697 | 184.492 | 180.178 | 157.895 | 222.121 | 251.464 | 198.282 | 187.17  | 290.233 | 253.788 | 263.668 | 200.311 | 260.87  | 168.063 | 155.108 | 396.254 |
| 191.067 | 200.892 | 186.977 | 168.148 | 208.41  | 237.189 | 191.342 | 195.079 | 284.651 | 227.273 | 226.298 | 232.919 | 263.026 | 183.819 | 138.28  | 343.782 |
| 193.548 | 184.492 | 163.18  | 178.401 | 216.636 | 233.895 | 203.239 | 179.262 | 295.814 | 227.273 | 271.972 | 214.286 | 263.026 | 181.193 | 125.476 | 343.782 |
| 198.511 | 221.391 | 197.176 | 166.097 | 213.894 | 221.816 | 210.948 | 187.17  | 293.023 | 219.697 | 244.983 | 237.578 | 241.466 | 175.941 | 150.718 | 376.35  |
| 166.253 | 176.293 | 166.58  | 172.249 | 208.41  | 234.993 | 196.299 | 195.079 | 265.116 | 234.848 | 205.536 | 246.894 | 255.439 | 170.689 | 136.817 | 343.782 |
| 198.511 | 221.391 | 176.778 | 170.198 | 197.441 | 234.993 | 205.088 | 197.715 | 304.186 | 227.273 | 207.612 | 237.578 | 251.072 | 175.941 | 135.353 | 347.4   |
| 178.66  | 196.792 | 176.778 | 157.895 | 191.956 | 240.483 | 198.252 | 184.534 | 284.651 | 223.485 | 236.678 | 209.627 | 248.889 | 173.315 | 141.207 | 338.353 |
| 188.586 | 196.792 | 183.578 | 149.692 | 216.636 | 232.796 | 199.229 | 187.17  | 304.186 | 231.061 | 240.83  | 218.944 | 247.797 | 165.437 | 122.916 | 365.494 |
| 188.586 | 209.091 | 193.776 | 157.895 | 208.41  | 239.385 | 195.322 | 163.445 | 276.279 | 223.485 | 230.45  | 237.578 | 237.973 | 181.193 | 150.718 | 331.116 |
| 186.104 | 217.291 | 186.977 | 143.541 | 208.41  | 231.698 | 195.322 | 150.264 | 284.651 | 219.697 | 242.907 | 232.919 | 231.423 | 168.063 | 148.157 | 320.26  |
| 181.141 | 184.492 | 173.379 | 168.148 | 197.441 | 240.483 | 204.112 | 160.808 | 287.442 | 193.182 | 209.689 | 223.602 | 228.148 | 170.689 | 138.646 | 320.26  |
| 168.734 | 168.093 | 203.975 | 169.557 | 200.183 | 189.177 | 179.696 | 168.717 | 287.442 | 204.545 | 232.526 | 237.578 | 229.24  | 157.559 | 141.939 | 313.022 |
| 176.179 | 188.592 | 193.776 | 167.464 | 208.41  | 217.445 | 180.673 | 189.807 | 284.651 | 219.697 | 199.308 | 228.261 | 218.324 | 152.307 | 121.453 | 320.26  |
| 171.216 | 163.993 | 197.176 | 177.931 | 208.41  | 247.072 | 191.416 | 171.353 | 287.442 | 196.97  | 213.841 | 242.236 | 222.69  | 194.323 | 143.036 | 331.116 |
| 176.179 | 168.093 | 207.375 | 173.744 | 222.121 | 250.366 | 194.346 | 155.536 | 284.651 | 246.212 | 207.612 | 200.311 | 231.423 | 173.315 | 142.67  | 331.116 |
| 173.697 | 192.692 | 180.178 | 154.904 | 208.41  | 224.012 | 196.299 | 155.536 | 265.116 | 242.424 | 184.775 | 214.286 | 222.69  | 157.559 | 147.425 | 336.544 |
| 151.365 | 168.093 | 183.578 | 163.278 | 200.183 | 242.451 | 185.556 | 150.264 | 295.814 | 212.121 | 188.927 | 260.87  | 221.599 | 181.193 | 145.962 | 378.16  |
| 168.734 | 172.193 | 203.975 | 156.998 | 183.729 | 235.928 | 184.579 | 160.808 | 262.326 | 223.485 | 193.08  | 214.286 | 227.057 | 175.941 | 132.427 | 329.307 |
| 168.734 | 168.093 | 183.578 | 146.531 | 200.183 | 245.713 | 196.299 | 142.355 | 279.07  | 223.485 | 203.46  | 218.944 | 229.24  | 168.063 | 136.085 | 352.828 |
| 166.253 | 163.993 | 166.58  | 156.998 | 194.698 | 233.753 | 188.486 | 179.262 | 262.326 | 223.485 | 184.775 | 200.311 | 216.14  | 154.933 | 139.378 | 345.591 |
| 176.179 | 176.293 | 166.58  | 150.718 | 194.698 | 217.445 | 188.486 | 192.443 | 278.83  | 204.545 | 180.623 | 237.578 | 236.881 | 160.185 | 126.208 | 389.016 |
| 166.253 | 127.095 | 180.178 | 155.844 | 213.894 | 223.968 | 181.65  | 181.898 | 270.548 | 200.758 | 159.862 | 204.969 | 218.324 | 154.933 | 139.743 | 361.875 |
| 166.253 | 192.692 | 183.578 | 151.743 | 194.698 | 214.183 | 180.673 | 208.26  | 281.59  | 223.485 | 188.927 | 251.553 | 213.957 | 157.559 | 129.135 | 338.353 |
| 166.253 | 184.492 | 183.578 | 151.743 | 180.987 | 204.398 | 177.743 | 187.17  | 281.59  | 204.545 | 174.394 | 218.944 | 219.415 | 168.063 | 146.694 | 329.307 |
| 173.697 | 213.191 | 186.977 | 147.642 | 197.441 | 200.049 | 173.837 | 205.624 | 267.787 | 185.606 | 191.003 | 228.261 | 208.499 | 168.063 | 134.256 | 271.407 |
| 163.772 | 159.893 | 193.776 | 141.49  | 200.183 | 204.398 | 177.743 | 187.17  | 298.155 | 219.697 | 180.623 | 256.211 | 220.507 | 173.315 | 144.865 | 347.4   |
| 168.734 | 192.692 | 197.176 | 145.591 | 180.987 | 198.962 | 185.556 | 187.17  | 292.633 | 219.697 | 184.775 | 214.286 | 213.957 | 160.185 | 154.01  | 305.785 |
| 176.179 | 209.091 | 149.582 | 141.49  | 191.956 | 202.224 | 174.813 | 184.534 | 292.633 | 231.061 | 166.09  | 237.578 | 209.591 | 152.307 | 138.646 | 314.832 |

|         |         |         |         |         |         |         |         |         |         |         |         |         |         |         |         |
|---------|---------|---------|---------|---------|---------|---------|---------|---------|---------|---------|---------|---------|---------|---------|---------|
| 173.697 | 180.393 | 166.58  | 139.44  | 197.441 | 202.224 | 171.883 | 202.988 | 278.83  | 223.485 | 180.623 | 204.969 | 204.133 | 170.689 | 131.695 | 314.832 |
| 171.216 | 168.093 | 166.58  | 129.187 | 172.761 | 193.526 | 172.86  | 202.988 | 265.026 | 185.606 | 180.623 | 228.261 | 207.408 | 149.681 | 135.719 | 287.691 |
| 176.179 | 159.893 | 146.182 | 143.541 | 200.183 | 207.66  | 185.556 | 208.26  | 281.59  | 204.545 | 161.938 | 200.311 | 210.682 | 144.429 | 116.697 | 255.122 |
| 173.697 | 159.893 | 169.979 | 129.187 | 200.183 | 203.311 | 170.907 | 202.988 | 270.548 | 231.061 | 188.927 | 209.627 | 223.782 | 183.819 | 159.498 | 296.738 |
| 176.179 | 176.293 | 183.578 | 129.187 | 170.018 | 204.398 | 170.907 | 195.079 | 270.698 | 215.909 | 164.014 | 214.286 | 203.041 | 154.933 | 148.889 | 296.738 |
| 176.179 | 188.592 | 169.979 | 127.136 | 200.183 | 203.311 | 169.93  | 202.988 | 253.953 | 223.485 | 199.308 | 232.919 | 209.591 | 144.429 | 133.524 | 302.166 |
| 193.548 | 192.692 | 149.582 | 135.338 | 208.41  | 203.311 | 173.837 | 210.896 | 270.698 | 212.121 | 188.927 | 223.602 | 209.591 | 154.933 | 152.547 | 330.477 |
| 168.734 | 225.491 | 169.979 | 133.288 | 183.729 | 187.003 | 169.93  | 210.896 | 293.023 | 223.485 | 170.242 | 223.602 | 208.499 | 139.177 | 139.743 | 361.689 |
| 196.03  | 184.492 | 166.58  | 127.136 | 194.698 | 205.485 | 174.813 | 200.351 | 270.698 | 208.333 | 182.699 | 242.236 | 207.408 | 141.803 | 140.109 | 361.689 |
| 208.437 | 155.794 | 183.578 | 133.288 | 213.894 | 191.351 | 167.977 | 195.079 | 267.907 | 212.121 | 164.014 | 204.969 | 197.583 | 168.063 | 141.938 | 337.821 |
| 173.697 | 184.492 | 149.582 | 135.338 | 189.214 | 170.694 | 157.234 | 210.896 | 273.488 | 185.606 | 182.699 | 190.994 | 203.041 | 152.307 | 150.718 | 337.821 |
| 188.586 | 180.393 | 166.58  | 139.44  | 167.276 | 167.433 | 165.047 | 208.26  | 293.023 | 208.333 | 170.242 | 218.944 | 195.4   | 141.803 | 175.594 | 337.821 |
| 178.66  | 184.492 | 169.979 | 127.136 | 197.441 | 177.218 | 157.234 | 202.988 | 267.907 | 196.97  | 157.785 | 163.043 | 204.133 | 144.429 | 162.79  | 308.446 |
| 200.993 | 172.193 | 166.58  | 139.44  | 178.245 | 181.566 | 163.094 | 197.715 | 262.326 | 227.273 | 184.775 | 237.578 | 203.041 | 144.429 | 155.108 | 347.001 |
| 193.548 | 184.492 | 159.781 | 145.591 | 164.534 | 187.003 | 151.375 | 192.443 | 287.442 | 208.333 | 149.481 | 223.602 | 197.583 | 173.315 | 140.841 | 337.821 |
| 198.511 | 188.592 | 163.18  | 137.389 | 175.503 | 202.224 | 173.837 | 192.443 | 306.977 | 238.636 | 168.166 | 181.677 | 203.041 | 165.437 | 142.67  | 341.493 |
| 208.437 | 184.492 | 149.582 | 139.44  | 170.018 | 178.305 | 154.304 | 192.443 | 276.279 | 196.97  | 199.308 | 195.652 | 193.216 | 173.315 | 138.28  | 334.149 |
| 208.437 | 168.093 | 159.781 | 147.642 | 183.729 | 177.218 | 163.094 | 210.896 | 279.07  | 189.394 | 195.156 | 190.994 | 198.675 | 147.055 | 157.668 | 328.641 |
| 203.474 | 196.792 | 156.381 | 129.187 | 219.378 | 185.915 | 176.767 | 197.715 | 270.698 | 223.485 | 191.003 | 190.994 | 209.591 | 144.429 | 141.207 | 334.149 |
| 193.548 | 200.892 | 163.18  | 137.389 | 180.987 | 187.003 | 165.047 | 197.715 | 281.86  | 200.758 | 186.851 | 190.994 | 206.316 | 162.811 | 154.376 | 374.541 |
| 196.03  | 168.093 | 142.783 | 142.344 | 189.214 | 187.003 | 177.743 | 200.351 | 284.651 | 219.697 | 176.471 | 214.286 | 214.517 | 131.299 | 120.721 | 358.017 |
| 205.955 | 163.993 | 166.58  | 138.158 | 191.956 | 171.781 | 146.492 | 213.533 | 284.651 | 193.182 | 188.927 | 246.894 | 231.764 | 152.307 | 136.817 | 324.969 |
| 186.104 | 204.992 | 166.58  | 148.624 | 194.698 | 191.351 | 176.767 | 202.988 | 262.326 | 223.485 | 186.851 | 204.969 | 238.232 | 139.177 | 124.013 | 334.149 |
| 181.141 | 184.492 | 180.178 | 150.718 | 200.183 | 238.287 | 168.954 | 226.714 | 265.116 | 219.697 | 186.851 | 256.211 | 224.218 | 141.803 | 132.793 | 359.853 |
| 186.104 | 180.393 | 203.975 | 159.091 | 200.183 | 239.385 | 164.071 | 221.441 | 270.698 | 227.273 | 164.014 | 218.944 | 227.452 | 149.681 | 130.964 | 313.953 |
| 191.067 | 204.992 | 180.178 | 154.904 | 186.472 | 249.268 | 190.439 | 221.441 | 259.535 | 253.788 | 188.927 | 204.969 | 238.232 | 147.055 | 147.426 | 350.673 |
| 176.179 | 184.492 | 186.977 | 174.299 | 186.472 | 251.464 | 174.813 | 216.169 | 298.605 | 231.061 | 159.862 | 177.019 | 233.92  | 160.185 | 133.524 | 345.165 |
| 183.623 | 172.193 | 183.578 | 147.642 | 186.472 | 268.544 | 166.024 | 218.805 | 306.977 | 196.97  | 170.242 | 265.528 | 244.7   | 162.811 | 143.767 | 330.477 |

|         |         |         |         |         |         |         |         |         |         |         |         |         |         |         |         |
|---------|---------|---------|---------|---------|---------|---------|---------|---------|---------|---------|---------|---------|---------|---------|---------|
| 181.141 | 217.291 | 173.379 | 147.642 | 186.472 | 239.189 | 180.673 | 208.26  | 293.023 | 204.545 | 164.014 | 288.82  | 240.388 | 160.185 | 155.474 | 323.133 |
| 171.216 | 176.293 | 190.377 | 143.541 | 161.792 | 259.847 | 160.164 | 208.26  | 267.907 | 215.909 | 151.557 | 279.503 | 214.517 | 152.307 | 144.499 | 356.181 |
| 181.141 | 176.293 | 166.58  | 147.642 | 189.214 | 246.8   | 178.72  | 205.624 | 259.535 | 223.485 | 180.623 | 270.186 | 223.14  | 149.681 | 146.328 | 341.493 |
| 188.586 | 176.293 | 163.18  | 141.49  | 186.472 | 240.277 | 172.86  | 202.988 | 309.767 | 227.273 | 153.633 | 228.261 | 211.283 | 152.307 | 152.913 | 339.657 |
| 203.474 | 196.792 | 183.578 | 141.49  | 159.049 | 274.524 | 160.164 | 208.26  | 306.977 | 208.333 | 182.699 | 270.186 | 219.907 | 149.681 | 155.108 | 396.573 |
| 203.474 | 155.794 | 173.379 | 129.187 | 180.987 | 264.641 | 177.743 | 202.988 | 304.186 | 181.818 | 157.785 | 265.528 | 214.517 | 133.925 | 133.525 | 348.837 |
| 196.03  | 180.393 | 186.977 | 133.288 | 197.441 | 252.562 | 166.024 | 192.443 | 315.349 | 204.545 | 139.1   | 246.894 | 204.815 | 141.803 | 120.721 | 348.837 |
| 210.918 | 200.892 | 169.979 | 133.288 | 202.925 | 245.974 | 173.837 | 189.807 | 306.977 | 212.121 | 178.547 | 204.969 | 205.893 | 154.933 | 142.304 | 354.345 |
| 196.03  | 155.794 | 152.981 | 140.251 | 202.925 | 247.072 | 153.328 | 187.17  | 326.512 | 185.606 | 145.329 | 232.919 | 199.425 | 160.185 | 143.036 | 352.509 |
| 210.918 | 196.792 | 156.381 | 142.344 | 205.667 | 228.404 | 167.977 | 189.807 | 301.395 | 234.848 | 178.547 | 214.286 | 198.347 | 141.803 | 135.719 | 334.149 |
| 205.955 | 196.792 | 180.178 | 123.505 | 194.698 | 222.914 | 165.047 | 166.081 | 334.884 | 196.97  | 151.557 | 246.894 | 196.191 | 162.811 | 140.475 | 341.493 |
| 183.623 | 176.293 | 156.381 | 129.785 | 194.698 | 220.717 | 156.258 | 189.807 | 309.767 | 227.273 | 149.481 | 237.578 | 198.347 | 165.437 | 157.303 | 321.297 |
| 191.067 | 168.093 | 166.58  | 131.878 | 197.441 | 218.521 | 171.883 | 173.989 | 301.395 | 223.485 | 149.481 | 232.919 | 191.879 | 165.437 | 142.67  | 330.477 |
| 181.141 | 172.193 | 166.58  | 136.065 | 205.667 | 196.559 | 159.188 | 176.626 | 298.605 | 246.212 | 151.557 | 223.602 | 196.191 | 139.177 | 126.94  | 295.594 |
| 163.772 | 192.692 | 186.977 | 117.225 | 208.41  | 204.246 | 153.328 | 189.527 | 293.023 | 223.485 | 168.166 | 223.602 | 188.645 | 162.811 | 120.721 | 321.297 |
| 173.697 | 204.992 | 169.979 | 129.785 | 202.925 | 202.05  | 151.375 | 173.95  | 290.233 | 231.061 | 164.014 | 223.602 | 198.347 | 147.055 | 139.011 | 284.578 |
| 173.697 | 180.393 | 149.582 | 136.065 | 186.472 | 197.657 | 135.749 | 189.527 | 287.442 | 231.061 | 153.633 | 223.602 | 184.333 | 141.803 | 144.865 | 249.694 |
| 191.067 | 180.393 | 176.778 | 136.065 | 197.441 | 189.971 | 138.679 | 189.527 | 295.814 | 223.485 | 155.709 | 200.311 | 189.723 | 136.551 | 127.306 | 286.414 |
| 161.29  | 188.592 | 149.582 | 136.065 | 180.987 | 185.578 | 145.515 | 197.316 | 273.488 | 204.545 | 143.253 | 237.578 | 182.178 | 152.307 | 141.939 | 273.562 |
| 183.623 | 163.993 | 149.582 | 129.785 | 208.41  | 184.48  | 168.539 | 184.335 | 287.442 | 212.121 | 166.09  | 195.652 | 204.815 | 162.811 | 147.425 | 266.218 |
| 186.104 | 168.093 | 166.58  | 125.598 | 175.503 | 186.676 | 176.471 | 173.95  | 290.233 | 212.121 | 161.938 | 260.87  | 180.022 | 160.185 | 164.253 | 282.742 |
| 203.474 | 188.592 | 149.582 | 131.878 | 175.503 | 184.48  | 190.35  | 192.123 | 298.605 | 227.273 | 141.176 | 190.994 | 191.879 | 157.559 | 154.376 | 244.186 |
| 183.623 | 213.191 | 203.975 | 117.225 | 186.472 | 189.971 | 192.333 | 194.72  | 273.488 | 227.273 | 168.166 | 190.994 | 189.723 | 149.681 | 132.061 | 235.006 |
| 188.586 | 139.394 | 156.381 | 136.065 | 208.41  | 209.736 | 200.264 | 205.105 | 290.233 | 231.061 | 159.862 | 204.969 | 199.425 | 141.803 | 160.595 | 251.53  |
| 181.141 | 159.893 | 166.58  | 129.785 | 189.214 | 200.952 | 201.256 | 197.316 | 290.233 | 234.848 | 143.253 | 200.311 | 199.425 | 139.177 | 136.085 | 321.297 |
| 163.772 | 172.193 | 176.778 | 119.318 | 191.956 | 194.363 | 191.342 | 186.931 | 281.86  | 234.848 | 157.785 | 214.286 | 197.269 | 165.437 | 130.232 | 317.625 |
| 168.734 | 188.592 | 210.774 | 140.251 | 189.214 | 195.461 | 178.453 | 202.508 | 306.977 | 223.485 | 151.557 | 200.311 | 211.283 | 152.307 | 129.866 | 308.446 |
| 163.772 | 163.993 | 173.379 | 108.852 | 194.698 | 176.794 | 172.505 | 205.105 | 279.07  | 212.121 | 145.329 | 256.211 | 189.723 | 152.307 | 156.571 | 308.446 |

|         |         |         |         |         |         |         |         |         |         |         |         |         |         |         |         |
|---------|---------|---------|---------|---------|---------|---------|---------|---------|---------|---------|---------|---------|---------|---------|---------|
| 163.772 | 180.393 | 207.375 | 127.691 | 167.276 | 173.499 | 194.316 | 202.508 | 279.07  | 253.788 | 130.796 | 237.578 | 196.191 | 170.689 | 125.476 | 251.53  |
| 163.772 | 204.992 | 210.774 | 146.531 | 202.925 | 184.48  | 182.419 | 205.105 | 276.279 | 212.121 | 159.862 | 242.236 | 191.879 | 160.185 | 127.306 | 251.53  |
| 171.216 | 209.091 | 217.573 | 131.878 | 172.761 | 196.559 | 181.428 | 197.316 | 256.744 | 231.061 | 134.948 | 218.944 | 182.178 | 144.429 | 137.914 | 286.414 |
| 161.29  | 217.291 | 210.774 | 150.718 | 186.472 | 176.794 | 192.333 | 181.738 | 259.535 | 208.333 | 155.709 | 186.335 | 186.489 | 154.933 | 142.304 | 238.678 |
| 161.29  | 209.091 | 183.578 | 154.904 | 194.698 | 183.382 | 185.393 | 189.527 | 284.651 | 227.273 | 143.253 | 223.602 | 195.113 | 160.185 | 159.498 | 291.922 |
| 166.253 | 217.291 | 220.973 | 152.811 | 159.049 | 189.971 | 185.393 | 184.335 | 256.744 | 181.818 | 164.014 | 228.261 | 194.035 | 110.291 | 156.205 | 233.17  |
| 166.253 | 192.692 | 197.176 | 129.785 | 167.276 | 197.657 | 184.402 | 194.72  | 284.651 | 242.424 | 130.796 | 218.944 | 197.269 | 131.299 | 124.379 | 258.874 |

**Figure 4C**

| <b>SHAM</b> | <b>MI</b>  | <b>MI+ARM36</b> | <b>MI+S107</b> | <b>MI+Propr</b> | <b>MI+SD-208</b> |
|-------------|------------|-----------------|----------------|-----------------|------------------|
| 180.1758    | 135.2569   | 126.570916      | 192.914        | 166.2531        | 161.6405         |
| 130.0198    | 114.3922   | 121.9503        | 194.6056       | 192.6921        | 170.9568         |
| 179.2829    | 106.2237   | 175.0919        | 142.9706       | 197.176         | 144.3089         |
| 255.3606    | 154.8773   | 66.67183        | 140.8451       | 129.7847        | 194.0585         |
| 117.9775    | 125.9446   | 201.7911        | 233.5634       | 167.276         | 151.6849         |
| 142.7313    |            | 129.2916        | 204.6679       | 197.6574        | 236.4407         |
| 225.4547    | 160.6119   | 110.3774        | 278.1073       | 184.4018        | 183.263          |
| 197.903     | 148.5149   | 101.6598        | 220.2656       | 194.7196        | 152.2842672      |
| 168.2243    | 174.003113 | 162.6506        | 225.1816       | 284.6512        | 191.0509         |
| 177.6217    | 93.28358   | 152.3948        | 200.3169       | 242.4242        | 133.5927         |
| 210.0457    | 129.599308 | 138.0753        | 136.6021       | 130.7958        | 182.0634         |
| 314.6132    | 210.290726 | 27.86378        |                | 218.9441        | 105.1136         |
| 342.9032    |            |                 |                | 197.2691        | 191.9845         |
|             |            |                 |                | 131.2991        | 160.7206         |
|             |            |                 |                | 124.3789        | 157.8947         |
|             |            |                 |                | 258.8739        | 266.7913         |

**Figure 4D**

**SHAM**

|    |          |          |          |          |          |          |          |          |          |          |          |          |          |
|----|----------|----------|----------|----------|----------|----------|----------|----------|----------|----------|----------|----------|----------|
| 5  | 4.161488 | 0.416149 | 0.241437 | 0.685453 | 0.573639 | 0.352126 | 0.518799 | 0.992442 | 0.235153 | 0.162328 | 0.165856 | 0.152588 | 0.158286 |
| 7  | 5.931239 | 0.454964 | 0.313868 | 1.788139 | 1.089913 | 0.349438 | 0.915527 | 1.519676 | 0.653202 | 0.243491 | 0.230197 | 2.390544 | 0.300744 |
| 9  | 6.325014 | 0.769939 | 1.231326 | 2.205372 | 1.77828  | 0.757115 | 1.800537 | 2.326035 | 0.783842 | 0.730474 | 0.328853 | 4.679362 | 0.395715 |
| 10 | 6.16792  | 1.189906 | 1.593481 | 2.920628 | 2.093781 | 1.019194 | 2.149552 | 2.419076 | 1.071251 | 1.163347 | 0.295968 | 4.83195  | 0.506516 |
| 11 | 5.994524 | 1.609872 | 2.076354 | 2.831221 | 1.893008 | 1.71807  | 2.512856 | 2.760228 | 1.724452 | 1.089913 | 0.526165 | 5.137125 | 0.664802 |
| 12 | 5.20186  | 1.88985  | 2.052211 | 2.801418 | 2.610056 | 1.601591 | 2.633958 | 3.008338 | 1.81527  | 1.226153 | 0.98656  | 4.984538 | 0.80726  |
| 13 | 5.562075 | 2.694786 | 2.172929 | 3.09381  | 2.495328 | 1.776309 | 2.755059 | 2.946311 | 2.209894 | 1.198905 | 1.160995 | 5.289713 | 0.838917 |
| 14 | 5.586686 | 2.5198   | 2.414365 | 3.153883 | 2.982921 | 1.980148 | 2.966987 | 3.039352 | 2.367743 | 1.144409 | 1.061481 | 4.730225 | 1.139661 |
| 15 | 5.315965 | 2.834775 | 2.51094  | 3.183921 | 2.982921 | 2.154867 | 2.81561  | 2.512118 | 2.456038 | 1.00817  | 1.525879 | 5.0354   | 1.218804 |
| 25 | 5.291354 | 2.169828 | 2.599826 | 3.033736 | 2.66742  | 2.154867 | 2.573407 | 2.729214 | 2.142501 | 1.117161 | 1.227337 | 4.425049 | 0.680631 |
| 30 | 5.119078 | 3.359733 | 2.551231 | 2.883551 | 2.839511 | 2.154867 | 2.960205 | 2.946311 | 2.456038 | 1.226153 | 1.492708 | 4.918952 | 1.092175 |
| 35 | 4.799135 | 3.534719 | 3.017957 | 3.153883 | 3.011603 | 2.446065 | 3.204346 | 2.760228 | 2.893908 | 1.198905 | 1.791249 | 4.918952 | 1.060518 |
| 40 | 4.725302 | 4.234664 | 3.017957 | 2.463033 | 3.269741 | 2.649904 | 3.570557 | 3.256449 | 2.893908 | 1.307896 | 1.990277 | 5.069532 | 1.361261 |

**MI**

|          |          |          |          |          |          |          |          |          |          |          |          |
|----------|----------|----------|----------|----------|----------|----------|----------|----------|----------|----------|----------|
| 0.602321 | 1.298057 | 1.519127 | 1.093724 | 0.930968 | 1.839712 | 0.222019 | 0.133381 | 0.415704 | 1.284541 | 0.538545 | 0.999969 |
| 1.520143 | 1.867334 | 1.957986 | 1.253782 | 2.202533 | 3.435933 | 0.284073 | 0.052982 | 1.027034 | 2.101976 | 1.256606 | 1.370328 |
| 1.835644 | 1.894011 | 2.936979 | 2.187449 | 2.792903 | 5.735573 | 0.486983 | 0.266762 | 1.173753 | 2.374454 | 2.833138 | 1.777723 |
| 2.093781 | 2.240801 | 3.34208  | 2.614268 | 2.906436 | 7.304739 | 0.669601 | 0.506848 | 1.736176 | 2.997262 | 2.543132 | 2.036974 |
| 2.3806   | 2.187449 | 4.152281 | 2.854354 | 3.201621 | 7.331794 | 0.706425 | 0.400143 | 1.736176 | 2.724784 | 2.520823 | 2.444369 |
| 2.466646 | 2.054068 | 3.814697 | 2.854354 | 3.33786  | 7.981104 | 0.50459  | 0.453495 | 1.662817 | 2.763709 | 2.81083  | 1.999938 |
| 2.66742  | 2.000715 | 4.456107 | 3.147792 | 3.088088 | 7.764668 | 0.766976 | 0.506848 | 1.785083 | 2.530156 | 2.877754 | 2.407333 |
| 2.638738 | 2.10742  | 3.848456 | 3.361202 | 3.83727  | 8.873906 | 0.867894 | 0.693581 | 1.931802 | 2.880486 | 2.699289 | 2.740656 |
| 2.753466 | 2.054068 | 4.253556 | 3.65464  | 3.566403 | 8.90096  | 1.271566 | 0.613553 | 1.980708 | 2.608007 | 2.917121 | 3.111015 |
| 2.724784 | 2.054068 | 4.152281 | 3.387878 | 3.543831 | 8.60336  | 0.968812 | 0.506848 | 1.516098 | 2.724784 | 2.98444  | 2.444369 |
| 2.868193 | 2.187449 | 4.321073 | 3.86805  | 3.769553 | 8.549251 | 1.231199 | 0.826962 | 2.200787 | 3.152964 | 2.715167 | 2.8888   |
| 3.126331 | 1.787306 | 4.186039 | 3.921402 | 3.724409 | 8.846851 | 1.594503 | 1.147077 | 2.608761 | 2.919411 | 2.98444  | 3.073979 |
| 3.183695 | 1.787306 | 4.186039 | 4.695012 | 3.566403 | 9.754725 | 1.251382 | 1.253782 | 2.608761 | 2.724784 | 2.647849 | 2.740656 |

**MI+ARM36**

|          |          |          |          |          |          |          |          |          |          |          |          |
|----------|----------|----------|----------|----------|----------|----------|----------|----------|----------|----------|----------|
| 0.211928 | 0.397741 | 0.337584 | 0.4014   | 1.050423 | 2.831129 | 0.067717 | 0.6186   | 0.031014 | 0.17856  | 0.226296 | 0.122561 |
| 0.701904 | 0.63277  | 0.337584 | 0.643913 | 1.802921 | 5.565832 | 0.20315  | 1.134099 | 0.093041 | 0.373353 | 0.293438 | 0.199161 |
| 1.647949 | 0.83164  | 2.194295 | 0.747051 | 3.750197 | 7.899393 | 0.970603 | 2.061999 | 0.217097 | 0.308422 | 0.912919 | 0.228882 |
| 1.861572 | 0.958194 | 2.768187 | 0.830676 | 3.691839 | 8.713248 | 1.625196 | 2.577498 | 0.496221 | 0.565739 | 0.905182 | 0.291081 |
| 2.755059 | 0.958194 | 3.13953  | 1.106638 | 4.217052 | 9.912357 | 1.896062 | 2.680598 | 1.333593 | 0.533411 | 1.131478 | 0.320435 |
| 3.509521 | 1.04859  | 3.510872 | 1.067613 | 3.989769 | 9.80309  | 2.189501 | 2.938348 | 1.860828 | 0.727379 | 1.196134 | 0.411987 |
| 4.02832  | 1.138985 | 3.814697 | 1.218139 | 4.548765 | 9.874242 | 2.166929 | 2.680598 | 1.829814 | 0.872854 | 1.108544 | 0.411987 |
| 3.936768 | 1.355935 | 3.915972 | 1.226501 | 4.665479 | 10.16739 | 2.166929 | 2.989898 | 1.612718 | 0.614231 | 1.499796 | 0.473022 |
| 3.997803 | 1.518647 | 4.017248 | 1.193051 | 4.665479 | 9.650528 | 2.347506 | 3.092998 | 1.829814 | 0.759707 | 1.010732 | 0.50354  |
| 3.967285 | 1.482489 | 3.915972 | 1.140088 | 4.855907 | 9.777814 | 2.347506 | 3.041448 | 1.7988   | 0.743543 | 1.271566 | 0.534058 |
| 3.814697 | 1.717518 | 4.051006 | 1.123363 | 5.540832 | 9.226244 | 2.347506 | 3.453847 | 2.139952 | 0.925267 | 1.499796 | 0.62561  |
| 4.425049 | 1.717518 | 4.287314 | 1.243226 | 5.718975 | 9.746957 | 2.482939 | 3.556947 | 2.481104 | 0.892801 | 1.422429 | 0.488281 |
| 4.211426 | 1.699439 | 4.051006 | 1.223714 | 5.411833 | 9.974529 | 2.460367 | 3.814697 | 2.574145 | 1.12006  | 1.487085 | 0.656128 |

**MI+S107**

|          |          |          |          |          |          |          |          |          |          |          |
|----------|----------|----------|----------|----------|----------|----------|----------|----------|----------|----------|
| 0.099514 | 0        | 0.277892 | 0.641409 | 0.223651 | 0.646559 | 0.3093   | 0.222316 | 0.289724 | 0.396729 | 0.177428 |
| 0.361739 | 0.26537  | 0.530521 | 0.877718 | 0.566153 | 1.422429 | 0.25775  | 0.391704 | 0.362155 | 1.068115 | 0.440157 |
| 1.085216 | 0.364884 | 1.212619 | 0.978993 | 2.057613 | 1.810365 | 0.46395  | 0.818699 | 0.72431  | 1.312256 | 0.857568 |
| 1.348298 | 1.249642 | 1.187356 | 1.485369 | 2.371876 | 2.133644 | 0.56705  | 0.790462 | 1.038177 | 1.556396 | 1.330708 |
| 1.54561  | 2.720045 | 1.338933 | 1.519127 | 2.868193 | 2.068988 | 1.005224 | 0.666955 | 1.231326 | 1.617432 | 1.862992 |
| 2.071775 | 3.615669 | 1.465248 | 1.789194 | 2.768426 | 2.165972 | 1.340299 | 1.231571 | 1.424476 | 1.831055 | 2.217847 |
| 2.696596 | 3.847583 | 1.263145 | 1.417852 | 3.26226  | 2.35994  | 1.391849 | 1.090419 | 1.472763 | 1.983643 | 2.631845 |
| 3.156991 | 3.979124 | 1.439985 | 1.789194 | 3.479245 | 2.165972 | 1.366074 | 1.280975 | 1.496907 | 2.210102 | 2.963726 |
| 3.814697 | 4.14355  | 1.490511 | 1.890469 | 3.384468 | 2.715547 | 1.623824 | 1.602108 | 1.617625 | 2.210102 | 2.934382 |
| 3.09122  | 4.345438 | 1.313671 | 1.654161 | 3.838388 | 2.295284 | 1.675374 | 1.344494 | 1.472763 | 2.300929 | 2.37685  |
| 4.57106  | 4.932798 | 1.389459 | 1.620402 | 3.895758 | 2.230628 | 1.984674 | 1.70797  | 1.569337 | 2.331204 | 2.787663 |
| 5.228766 | 4.867028 | 1.74314  | 2.025503 | 3.623899 | 2.1983   | 2.371298 | 1.644451 | 1.762487 | 2.391755 | 3.110445 |
| 6.070344 | 4.998569 | 1.490511 | 1.789194 | 3.706205 | 2.165972 | 1.933124 | 1.880881 | 1.847369 | 2.563477 | 3.169133 |



**MI+Prop**

|          |          |          |          |          |          |          |          |          |          |          |          |          |          |          |          |          |
|----------|----------|----------|----------|----------|----------|----------|----------|----------|----------|----------|----------|----------|----------|----------|----------|----------|
| 0.370083 | 0.769632 | 0.917459 | 0.873244 | 1.144409 | 0.73115  | 0.551522 | 0.55689  | 0.562824 | 0.717294 | 0.035651 | 0.132455 | 0.193968 | 0.627074 | 0.131541 | 0.487593 | 0.303442 |
| 1.537266 | 1.204641 | 1.352045 | 1.149005 | 2.034505 | 1.398722 | 0.735363 | 0.30629  | 0.687896 | 1.630213 | 0.106954 | 0.052982 | 0.452591 | 1.4893   | 0.526165 | 0.860458 | 0.471479 |
| 2.476707 | 2.208509 | 2.028067 | 1.746488 | 2.161662 | 1.716614 | 1.011125 | 0.501201 | 1.438329 | 1.728025 | 0.211928 | 0.450346 | 0.905182 | 2.011861 | 1.414069 | 1.204641 | 0.72865  |
| 2.448239 | 2.777367 | 2.241135 | 1.884369 | 2.511342 | 1.811981 | 1.286886 | 0.473357 | 1.375793 | 1.923651 | 0.570422 | 0.55631  | 1.09915  | 2.325398 | 1.808693 | 1.405415 | 1.585885 |
| 2.448239 | 3.011603 | 2.670288 | 1.930329 | 2.861023 | 1.970927 | 1.641476 | 0.723957 | 1.563401 | 2.086672 | 0.819982 | 0.688765 | 1.422429 | 2.377654 | 2.119276 | 1.405415 | 1.671609 |
| 3.330743 | 3.145452 | 2.897238 | 2.11417  | 2.988179 | 2.415975 | 1.548998 | 0.779646 | 1.594669 | 1.891047 | 0.998239 | 0.768238 | 1.616397 | 2.482166 | 2.433514 | 1.548824 | 1.603907 |
| 3.159936 | 3.212377 | 2.559227 | 2.25205  | 3.147125 | 2.585167 | 1.595237 | 0.891024 | 2.157493 | 1.923651 | 1.069541 | 0.768238 | 1.745709 | 2.273142 | 2.565055 | 1.77828  | 1.777302 |
| 3.330743 | 3.74718  | 2.897238 | 2.16013  | 3.306071 | 2.742799 | 1.733953 | 1.280847 | 2.126225 | 2.327612 | 1.212147 | 0.874201 | 1.875021 | 2.769575 | 2.59794  | 1.92169  | 2.557581 |
| 3.188404 | 3.679664 | 2.655802 | 2.29801  | 3.178914 | 2.868905 | 1.803311 | 1.364381 | 1.751009 | 1.972005 | 1.426055 | 0.900692 | 2.068988 | 2.42991  | 2.630826 | 1.950372 | 2.861023 |
| 3.50155  | 3.645905 | 2.945526 | 2.29801  | 3.083547 | 2.616693 | 1.641476 | 1.085936 | 1.969885 | 2.004333 | 1.28345  | 0.953674 | 1.713381 | 2.42991  | 2.706153 | 1.835644 | 2.05736  |
| 3.586954 | 4.152281 | 2.607515 | 2.481851 | 3.210704 | 2.900431 | 1.780192 | 1.503603 | 1.907349 | 2.068988 | 1.319101 | 0.900692 | 1.810365 | 2.377654 | 2.771361 | 1.92169  | 4.421581 |
| 3.786229 | 4.287314 | 2.800664 | 2.25205  | 3.019969 | 3.026537 | 1.965147 | 1.962634 | 2.501441 | 1.616397 | 1.426055 | 1.006656 | 2.03666  | 2.482166 | 2.696596 | 2.122463 | 4.421581 |
| 3.757761 | 4.316631 | 2.51094  | 2.25205  | 3.751119 | 3.528595 | 1.942028 | 2.045562 | 2.595245 | 1.681053 | 1.568661 | 1.298057 | 2.392268 | 2.795703 | 2.795252 | 2.437964 | 4.843379 |

**MI+SD-208**

|          |          |          |          |          |          |          |          |          |          |          |          |          |          |          |          |
|----------|----------|----------|----------|----------|----------|----------|----------|----------|----------|----------|----------|----------|----------|----------|----------|
| 0        | 0.367682 | 0.296952 | 0.226616 | 0.747209 | 1.535183 | 0.131541 | 0.455486 | 0.298542 | 0.431227 | 0.23657  | 0.370359 | 1.063112 | 0.234031 | 0.215611 | 0.115597 |
| 0.447534 | 1.149005 | 0.18274  | 0.793155 | 1.061823 | 3.582094 | 0.164427 | 1.224119 | 0.630254 | 0.431227 | 0.410814 | 0.62961  | 1.860059 | 0.748898 | 0.240493 | 0.023119 |
| 0.895069 | 1.884369 | 0.499544 | 1.926233 | 1.140476 | 4.791632 | 0.624821 | 1.508798 | 0.630254 | 0.928796 | 1.056378 | 1.296256 | 2.080744 | 1.651485 | 0.489278 | 0.231194 |
| 1.619648 | 1.838408 | 0.59037  | 2.190618 | 1.390775 | 4.931194 | 0.690592 | 1.651138 | 0.630254 | 1.227337 | 1.212423 | 1.555508 | 2.11227  | 1.860828 | 0.572205 | 0.393029 |
| 1.83276  | 1.976289 | 0.499544 | 2.190618 | 1.708666 | 5.629004 | 1.249642 | 1.651138 | 1.061481 | 1.459536 | 1.626421 | 2.148082 | 1.986165 | 2.246693 | 0.626106 | 0.459602 |
| 2.067182 | 2.068209 | 0.59037  | 2.670288 | 1.788139 | 5.768567 | 1.085216 | 1.765009 | 1.360023 | 1.426365 | 2.010848 | 1.925867 | 1.986165 | 2.504126 | 0.675864 | 0.485507 |
| 2.045871 | 2.481851 | 0.567663 | 2.593994 | 1.708666 | 5.768567 | 1.381184 | 1.979053 | 1.459536 | 1.525879 | 2.217847 | 2.148082 | 2.427535 | 2.410514 | 0.704889 | 0.554865 |
| 2.152427 | 2.25205  | 0.658489 | 2.708435 | 1.827876 | 6.326815 | 1.578495 | 2.237191 | 1.724907 | 1.393194 | 1.922134 | 2.333261 | 2.238376 | 2.667948 | 0.729768 | 1.063491 |
| 2.067182 | 2.527812 | 0.772022 | 2.479553 | 1.629194 | 6.373336 | 1.677151 | 2.179827 | 1.857592 | 1.592221 | 2.523569 | 2.111046 | 2.679746 | 2.597739 | 0.953674 | 0.716701 |
| 2.109805 | 2.11417  | 0.635783 | 2.757157 | 1.748403 | 6.69898  | 1.644266 | 2.151145 | 1.426365 | 1.55905  | 2.112755 | 2.148082 | 2.332955 | 2.246693 | 0.95782  | 0.73982  |
| 2.131116 | 2.435891 | 0.794729 | 3.097081 | 2.106031 | 6.792022 | 1.512725 | 2.351919 | 1.82442  | 1.55905  | 2.347506 | 2.185118 | 2.963484 | 2.76156  | 1.003432 | 0.670462 |
| 2.749139 | 2.573772 | 0.953674 | 3.13485  | 1.947085 | 6.65246  | 1.907349 | 2.3806   | 2.32199  | 1.990277 | 2.464881 | 2.25919  | 3.310275 | 3.323233 | 1.057334 | 0.901656 |
| 2.685206 | 2.481851 | 0.999087 | 3.66362  | 2.145767 | 6.00117  | 1.940234 | 2.179827 | 2.189305 | 1.890763 | 2.582257 | 2.666584 | 2.900431 | 3.440248 | 1.252215 | 1.040372 |

**Figure 4F**

| <b>SHAM</b> | <b>MI</b>  | <b>MI+ARM036</b> | <b>MI+S107</b> | <b>MI+propranolol</b> | <b>MI+SD-208</b> |
|-------------|------------|------------------|----------------|-----------------------|------------------|
| 103.614458  | 69.2237443 | 113.333333       | 82.5396825     | 202.409639            | 160.655738       |
| 96.3855422  | 67.5799087 | 60               | 98.4126984     | 185.542169            | 236.065574       |
| 100         | 62.6484018 | 80               | 85.7142857     | 200                   | 95.0819672       |
| 82.5396825  | 86.0273973 | 106.666667       | 117.460317     | 204.819277            | 108.196721       |
| 117.460317  | 67.9452055 | 93.3333333       | 165.079365     | 66.6666667            | 111.47541        |
| 86.6666667  | 69.4063927 | 106.666667       | 136.507937     | 105.555556            | 121.311475       |
| 113.333333  |            | 51.1111111       |                | 53.3333333            |                  |
| 103.614458  |            | 56.6666667       |                |                       |                  |
| 96.3855422  |            | 60               |                |                       |                  |
| 100         |            |                  |                |                       |                  |
| 82.5396825  |            |                  |                |                       |                  |
| 117.460317  |            |                  |                |                       |                  |
| 86.6666667  |            |                  |                |                       |                  |
| 113.333333  |            |                  |                |                       |                  |
| 100         |            |                  |                |                       |                  |
| 95.0819672  |            |                  |                |                       |                  |
| 104.918033  |            |                  |                |                       |                  |

**Figure 4G**

| <b>Time</b> | <b>Sham</b> |          |          |          | <b>MI</b> |          |          |          |
|-------------|-------------|----------|----------|----------|-----------|----------|----------|----------|
| <b>10</b>   | 6.61E-14    | 0.455867 | 1.220877 | 9.92E-12 | 1.35391   | 1.306354 | 5.38E-09 | 4.19E-18 |
| <b>20</b>   | 3.68E-08    | 1.450862 | 1.59301  | 1.105578 | 1.701334  | 1.946503 | 1.140967 | 0.184089 |
| <b>30</b>   | 0.00042     | 2.087529 | 2.064374 | 2.187397 | 2.071767  | 2.127518 | 1.857147 | 1.202719 |
| <b>40</b>   | 0.837937    | 2.879032 | 3.281264 | 2.876618 | 4.143933  | 2.385182 | 2.708812 | 2.321416 |
| <b>50</b>   | 1.143428    | 3.946627 | 3.596165 | 3.053969 | 4.594324  | 2.119806 | 2.675503 | 2.692763 |
| <b>60</b>   | 1.819863    | 4.28369  | 4.36611  | 3.500599 | 4.706116  | 2.896073 | 2.806483 | 2.911117 |
| <b>70</b>   | 2.308245    | 4.607466 | 4.517828 | 3.731033 | 5.097819  | 2.823043 | 3.255247 | 3.582495 |
| <b>80</b>   | 3.385018    | 4.968643 | 4.847978 | 4.104429 | 5.510344  | 3.186872 | 3.560457 | 4.008473 |
| <b>90</b>   | 3.691809    | 5.06644  | 5.458374 | 4.389735 | 5.879888  | 3.725384 | 3.610866 | 4.466627 |
| <b>100</b>  | 4.156576    | 5.653012 | 5.53029  | 3.918527 | 5.869845  | 3.692843 | 3.884115 | 4.260383 |
| <b>110</b>  | 4.293852    | 5.553723 | 5.986867 | 4.666897 | 6.149668  | 3.536073 | 3.944461 | 4.634053 |
| <b>120</b>  | 4.658205    | 5.799339 | 5.592099 | 4.782429 | 6.439783  | 4.069323 | 3.935042 | 5.183448 |

**Figure 4H**

| <b>SHAM</b> | <b>MI</b> |
|-------------|-----------|
| 7.265       | 7.338     |
| 7.149       | 7.222     |
| 7.193       | 7.088     |
| 7.368       | 7.174     |
| 7.362       | 7.251     |
| 7.346       | 7.237     |
|             | 7.104     |

**Figure 4I**

| <b>SHAM</b> | <b>MI</b> |
|-------------|-----------|
| 103         | 62        |
| 66          | 31        |
| 83          | 52        |
| 74          | 76        |
| 86          | 62        |
| 80          | 113       |
|             | 121       |

**Figure 4J**

| <b>SHAM</b> | <b>MI</b> |
|-------------|-----------|
| 48.4        | 41.4      |
| 56.5        | 55.7      |
| 53.2        | 66.2      |
| 28.8        | 48.8      |
| 31.8        | 54.5      |
| 45.1        | 58.8      |
|             | 83.9      |
