# Supplementary material for: Heart failure-induced cognitive dysfunction is mediated by intracellular Ca2+ leak through ryanodine receptor type 2
Source: PubMed Central journal article supplement (PMC10400432; doi:10.1038/s41593-023-01377-6), 2023-07-10
Supplement: 41593_2023_1377_MOESM8_ESM.pdf [file 41593_2023_1377_MOESM8_ESM.pdf]

**Figure 5A**

| Time   | WT+Iso+prop | WT+ISO     | WT+Iso+s107 | WT+S107    | S2808D     | WT         | S2808D+S107 |
|--------|-------------|------------|-------------|------------|------------|------------|-------------|
| 0      | 1           |            | 1           | 1          | 1          |            | 1           |
| 0.933  | 1.02081467  | 1          | 0.99722135  | 0.9843107  | 1.0226199  | 1          | 1.02341045  |
| 1.866  | 1.03106827  | 0.99309452 | 0.97606568  | 1.02001886 | 1.01092619 | 0.98531333 | 0.97556657  |
| 2.799  | 1.0612676   | 1.0058707  | 1.00858857  | 1.01230281 | 1.01551679 | 0.95855349 | 1.03352219  |
| 3.732  | 1.05628117  | 1.00075919 | 0.99854752  | 1.00214335 | 1.03139561 | 0.94150901 | 1.0184136   |
| 4.665  | 1.0360547   | 0.99668246 | 0.99595832  | 1.01251715 | 1.01442344 | 0.92375433 | 0.95298237  |
| 5.598  | 1.05188295  | 0.99012537 | 0.97196085  | 1.01508916 | 1.02134554 | 0.91003352 | 0.99252439  |
| 6.531  | 1.07210941  | 1.01008263 | 0.97347648  | 1.01371742 | 1.0000362  | 0.89747742 | 0.98630784  |
| 7.464  | 1.0360547   | 1.00048359 | 0.97455005  | 1.01984739 | 1.0101623  | 0.88892677 | 1.00204596  |
| 8.397  | 1.02168362  | 0.97644961 | 0.98181244  | 1.02503429 | 0.99406264 | 0.87977956 | 0.98197986  |
| 9.33   | 1.03165648  | 1.00117518 | 0.9845911   | 1.01384602 | 0.98747362 | 0.88006363 | 0.98343563  |
| 10.263 | 1.03429007  | 0.99247053 | 1.0102305   | 1.03532236 | 0.97148257 | 0.8799216  | 0.97100252  |
| 11.196 | 1.0360547   | 1.00337994 | 0.97587622  | 1.01924726 | 0.97898391 | 0.86770638 | 0.95565785  |
| 12.129 | 1.02755237  | 0.99627166 | 0.98383328  | 1.03789438 | 0.96095823 | 0.86818931 | 0.99378344  |
| 13.062 | 1.00145716  | 1.01008263 | 1.00170508  | 1.03703704 | 0.99304532 | 0.85242316 | 0.99378344  |
| 13.995 | 1.01260645  | 0.99599607 | 0.99943164  | 1.02812071 | 0.95290659 | 0.87645588 | 0.96313346  |
| 14.928 | 1.02081467  | 0.99274612 | 1.00985159  | 1.03450789 | 0.95877155 | 0.86159877 | 0.96769751  |
| 15.861 | 0.99676484  | 0.98549745 | 0.99349542  | 1.06074246 | 0.95184945 | 0.85875803 | 0.98260938  |
| 16.794 | 1.0067377   | 0.98743182 | 0.96785602  | 1.06665809 | 0.94398245 | 0.84668485 | 0.97119924  |
| 17.727 | 0.99236662  | 0.97396405 | 0.9772024   | 1.09087791 | 0.9239873  | 0.8708312  | 0.9548316   |
| 18.66  | 1.02433057  | 0.99551248 | 0.98364383  | 1.05384088 | 0.92067469 | 0.86350207 | 0.95050362  |
| 19.593 | 1.00029411  | 0.98473826 | 0.97827597  | 1.07878944 | 0.89827563 | 0.8643543  | 0.98713409  |
| 20.526 | 1.01143002  | 0.9770008  | 0.97417114  | 1.09246399 | 0.91022276 | 0.87722289 | 0.98528486  |
| 21.459 | 1.01260645  | 0.97569042 | 0.98793811  | 1.10223765 | 0.89230207 | 0.88892677 | 0.98095688  |
| 22.392 | 1.00644359  | 0.98611624 | 1.00650458  | 1.09134945 | 0.88115503 | 0.90534629 | 1.03064998  |
| 23.325 | 1.04015882  | 0.98017794 | 1.01711399  | 1.11166838 | 0.87754917 | 0.88355775 | 1.01180359  |
| 24.258 | 1.01524003  | 0.98770741 | 1.00909378  | 1.08620542 | 0.88833055 | 0.89426737 | 1.0016525   |

|        |            |            |            |            |            |            |            |
|--------|------------|------------|------------|------------|------------|------------|------------|
| 25.191 | 1.01612235 | 0.97251327 | 0.99204294 | 1.07926097 | 0.89762035 | 0.87983637 | 1.00539031 |
| 26.124 | 1.02696416 | 0.97617401 | 0.9875592  | 1.0932356  | 0.89601654 | 0.88270553 | 1.0217186  |
| 27.057 | 1.0035159  | 0.97299686 | 0.9926113  | 1.09863683 | 0.88599905 | 0.8894381  | 0.98799969 |
| 27.99  | 0.99383715 | 0.97907556 | 0.97549732 | 1.08693416 | 0.88909444 | 0.87117209 | 1.01554139 |
| 28.923 | 0.98798177 | 0.97707359 | 0.95579413 | 1.09053498 | 0.90297484 | 0.88219419 | 1.01408562 |
| 29.856 | 0.98973303 | 0.97251327 | 1.02172403 | 1.09344993 | 0.90730838 | 0.88673939 | 0.98363236 |
| 30.789 | 1.00086895 | 0.97769238 | 0.96659299 | 1.10682442 | 0.89233827 | 0.86679734 | 0.96104816 |
| 31.722 | 0.99354304 | 0.98708342 | 0.96785602 | 1.09653635 | 0.87787862 | 0.87034828 | 0.95400535 |
| 32.655 | 0.97976017 | 0.96975212 | 0.99349542 | 1.09242112 | 0.88406941 | 0.86949605 | 0.95215612 |
| 33.588 | 0.96921246 | 0.98522185 | 0.97568677 | 1.11329733 | 0.90443021 | 0.86983694 | 0.95546113 |
| 34.521 | 0.95748834 | 0.96284664 | 0.90716767 | 1.1038666  | 0.90683412 | 0.87452417 | 0.98237331 |
| 35.454 | 0.94458778 | 0.96105267 | 0.96899274 | 1.1196845  | 0.90715995 | 0.8685586  | 0.95817595 |
| 36.387 | 0.9522078  | 0.9707869  | 0.94190085 | 1.10575274 | 0.88611128 | 0.88048974 | 0.96439251 |
| 37.32  | 0.95250191 | 0.96726656 | 0.97530786 | 1.1253858  | 0.87988067 | 0.88682461 | 0.95298237 |
| 38.253 | 0.9486919  | 0.96181186 | 0.99071677 | 1.09940844 | 0.87602139 | 0.90301687 | 0.98154706 |
| 39.186 | 0.96540246 | 0.97161889 | 0.96772971 | 1.11364026 | 0.86476575 | 0.92244759 | 0.98197986 |
| 40.119 | 0.96218066 | 0.97051131 | 0.96324597 | 1.09692215 | 0.87423656 | 0.91577183 | 0.99087189 |
| 41.052 | 0.93667366 | 0.96892533 | 0.97530786 | 1.12495713 | 0.86549343 | 0.92267485 | 0.97056972 |
| 41.985 | 0.94107188 | 0.97354805 | 1.00612567 | 1.16863855 | 0.86006654 | 0.9122209  | 0.98713409 |
| 42.918 | 0.94107188 | 0.98956898 | 0.98364383 | 1.14437586 | 0.85045091 | 0.91665246 | 0.96832704 |
| 43.851 | 0.93842493 | 0.96989252 | 0.96210925 | 1.14386145 | 0.84364105 | 0.92148173 | 0.98674064 |
| 44.784 | 0.93989546 | 0.99185174 | 0.97701295 | 1.20374657 | 0.85999414 | 0.91514687 | 0.96915329 |
| 45.717 | 0.92846544 | 0.98777501 | 0.97922324 | 1.18865741 | 0.85529493 | 0.90384069 | 0.99106862 |
| 46.65  | 0.93726187 | 0.98756701 | 0.91089359 | 1.18102709 | 0.85722819 | 0.90412477 | 0.98072081 |
| 47.583 | 0.95132548 | 0.9770008  | 0.96103568 | 1.14656207 | 0.85933885 | 0.91315834 | 0.95132987 |
| 48.516 | 0.92259669 | 0.99371331 | 0.97789706 | 1.15629287 | 0.8503061  | 0.90378388 | 0.98154706 |
| 49.449 | 0.94048367 | 0.98943378 | 0.95579413 | 1.13743141 | 0.83832277 | 0.91918073 | 1.00767233 |
| 50.382 | 0.96100424 | 0.98508146 | 0.98402273 | 1.16743827 | 0.82524971 | 0.90946537 | 0.94822159 |
| 51.315 | 0.91908079 | 0.97486363 | 0.9926113  | 1.15046296 | 0.83770369 | 0.92111244 | 0.97702235 |

|        |            |            |            |            |            |            |            |
|--------|------------|------------|------------|------------|------------|------------|------------|
| 52.248 | 0.94341136 | 0.97962675 | 1.02191348 | 1.17052469 | 0.83049197 | 0.91699335 | 1.01200031 |
| 53.181 | 0.93198134 | 0.97969435 | 1.035491   | 1.15393519 | 0.82728797 | 0.9175615  | 1.00661001 |
| 54.114 | 0.95132548 | 1.0056627  | 1.02380802 | 1.17283951 | 0.84786599 | 0.92366911 | 1.01447907 |
| 55.047 | 0.93286366 | 0.98936618 | 1.0988317  | 1.15174897 | 0.86148934 | 0.93474803 | 1.01778407 |
| 55.98  | 0.92846544 | 1.00179397 | 1.06574045 | 1.09692215 | 0.87412795 | 0.93625362 | 0.97596003 |
| 56.913 | 0.95778244 | 0.99723885 | 1.02898642 | 1.03210734 | 0.89707368 | 0.94895176 | 0.97989455 |
| 57.846 | 0.93520313 | 0.98798301 | 1.06927692 | 1.10901063 | 0.88122744 | 0.93284472 | 0.9774158  |
| 58.779 | 0.94692726 | 1.00752427 | 1.01951374 | 1.0007716  | 0.88155689 | 0.94369638 | 0.91717816 |
| 59.712 | 0.92962849 | 1.01560493 | 1.04868961 | 0.98812586 | 0.87791483 | 0.94062837 | 1.43653604 |
| 60.645 | 0.93549724 | 0.99592327 | 1.06296179 | 1.01663237 | 0.87678528 | 0.93261746 | 3.49055713 |
| 61.578 | 0.91527078 | 1.01650452 | 1.00909378 | 1.07145919 | 0.90599782 | 0.94292938 | 3.22383538 |
| 62.511 | 0.91234309 | 1.01221979 | 0.99873698 | 1.17476852 | 0.89587172 | 0.9380717  | 3.04658483 |
| 63.444 | 0.9419542  | 1.00117518 | 1.00353647 | 1.22389403 | 0.91856041 | 0.94304301 | 4.36358986 |
| 64.377 | 0.93345187 | 0.99212734 | 1.01597727 | 1.18432785 | 0.90839811 | 0.96761548 | 5.18838527 |
| 65.31  | 0.92905365 | 1.00337994 | 0.99033786 | 1.17189643 | 0.91743086 | 0.98133629 | 5.84175323 |
| 66.243 | 0.94077778 | 0.98943378 | 0.99330597 | 1.17091049 | 0.90501309 | 0.97096756 | 6.04324048 |
| 67.176 | 0.92113953 | 0.97859197 | 0.94764762 | 1.17112483 | 0.88359514 | 0.96281461 | 6.29898489 |
| 68.109 | 0.93051081 | 0.98791541 | 0.94133249 | 1.16336591 | 0.89798238 | 0.96670644 | 6.83840888 |
| 69.042 | 0.89533842 | 0.988607   | 0.9417114  | 1.1773834  | 0.91572206 | 0.96292824 | 7.02852534 |
| 69.975 | 0.93637956 | 0.99019297 | 0.93425955 | 1.18055556 | 0.89568709 | 0.97153571 | 7.14656122 |
| 70.908 | 0.92728901 | 0.9944049  | 0.94133249 | 1.17884088 | 0.90625124 | 0.96741662 | 7.14636449 |
| 71.841 | 0.94399957 | 0.9942645  | 0.94562678 | 1.18338477 | 0.91138489 | 0.97730243 | 7.13101983 |
| 72.774 | 0.94136599 | 0.99378611 | 0.93943795 | 1.18454218 | 0.93888501 | 0.97201864 | 7.14510545 |
| 73.707 | 0.93579135 | 0.97603881 | 0.96659299 | 1.20096022 | 0.91076581 | 0.97792739 | 7.31137866 |
| 74.64  | 0.93256955 | 0.9943373  | 0.96564572 | 1.18008402 | 0.90843793 | 0.98752912 | 7.31637551 |
| 75.573 | 0.91087256 | 0.98874219 | 0.93167035 | 1.18642833 | 0.9005311  | 0.98636441 | 7.27057759 |
| 76.506 | 0.9337326  | 0.98680783 | 0.94910009 | 1.19933128 | 0.91429926 | 0.99818192 | 7.2834435  |
| 77.439 | 0.94166009 | 1.00614629 | 0.95156299 | 1.20820473 | 0.90814468 | 0.97744446 | 7.42610954 |
| 78.372 | 0.9299226  | 0.99889242 | 0.92017682 | 1.19097222 | 0.90107778 | 0.98218851 | 7.47517312 |

|         |            |            |            |            |            |            |            |
|---------|------------|------------|------------|------------|------------|------------|------------|
| 79.305  | 0.91731615 | 1.00863185 | 0.97998105 | 1.20914781 | 0.88053596 | 0.97801261 | 7.4619531  |
| 80.238  | 0.90647434 | 0.99675526 | 1.01395643 | 1.21274863 | 0.89317457 | 0.99065394 | 7.64294145 |
| 81.171  | 0.9011938  | 1.00414433 | 0.99797916 | 1.21553498 | 0.89011538 | 0.97892165 | 7.75059018 |
| 82.104  | 0.91878668 | 1.00055119 | 0.98629618 | 1.20057442 | 0.89117252 | 0.98835293 | 7.75908876 |
| 83.037  | 0.92377311 | 1.00497111 | 1.00524155 | 1.20250343 | 0.92205766 | 1.00397705 | 7.9005351  |
| 83.97   | 0.9161531  | 1.01284378 | 1.02860751 | 1.21656379 | 0.91058479 | 1.00292597 | 7.92001102 |
| 84.903  | 0.8976779  | 0.99613127 | 0.99892643 | 1.18968621 | 0.9137888  | 0.99170502 | 7.9953966  |
| 85.836  | 0.89708969 | 0.91105553 | 1.04982633 | 1.20361797 | 0.92132997 | 0.99389239 | 7.98752754 |
| 86.769  | 0.89856022 | 0.10972851 | 1.0453426  | 1.22007888 | 0.90486827 | 1.00249986 | 7.97820271 |
| 87.702  | 0.88389503 | 0.12077832 | 1.04628986 | 1.25248628 | 0.92682927 | 1.00215897 | 8.02644004 |
| 88.635  | 0.89738379 | 0.36351015 | 1.05759394 | 1.26350309 | 0.95859053 | 1.0132947  | 8.1291706  |
| 89.568  | 0.90384076 | 0.81824233 | 1.04610041 | 1.25625857 | 1.1433221  | 1.02641895 | 8.15336796 |
| 90.501  | 0.90384076 | 1.0874209  | 1.02955478 | 1.06460048 | 1.48554216 | 1.03119141 | 8.10556342 |
| 91.434  | 0.90559202 | 1.23292479 | 1.04085886 | 1.12414266 | 2.21139539 | 1.05192887 | 8.10182562 |
| 92.367  | 0.90676845 | 1.31088705 | 1.04868961 | 1.57848937 | 2.74191668 | 1.04681552 | 7.96868115 |
| 93.3    | 0.91468257 | 1.39410122 | 1.0757815  | 3.88644547 | 2.97957041 | 1.0588887  | 7.98937677 |
| 94.233  | 0.92377311 | 1.51032442 | 0.9922324  | 7.2188786  | 3.00805164 | 1.07493892 | 7.91151243 |
| 95.166  | 0.91380025 | 1.68302905 | 0.92611304 | 8.61831276 | 2.93935927 | 1.06323504 | 8.05441454 |
| 96.099  | 0.919669   | 1.90573602 | 0.94562678 | 9.07561728 | 2.85985294 | 0.9893472  | 7.87736072 |
| 97.032  | 0.87921607 | 2.09998908 | 0.88929586 | 9.13125857 | 2.73368764 | 0.53312312 | 7.83179887 |
| 97.965  | 0.894162   | 2.33754179 | 0.89340069 | 9.13194444 | 2.63545691 | 0.54664508 | 7.78249921 |
| 98.898  | 0.89708969 | 2.57405973 | 0.89933691 | 9.18389918 | 2.48200871 | 0.93963411 | 7.74024237 |
| 99.831  | 0.9047097  | 2.76969596 | 0.91196716 | 9.23971193 | 2.38196056 | 1.03766831 | 7.74067517 |
| 100.764 | 0.89563253 | 2.94260859 | 0.89359015 | 9.22800926 | 2.22275964 | 1.05599114 | 7.74523922 |
| 101.697 | 0.88771841 | 3.09487757 | 0.85607831 | 9.16915295 | 2.00524588 | 1.07002443 | 7.63940038 |
| 102.63  | 0.87334733 | 3.17277223 | 5.15352068 | 9.23452503 | 1.84284095 | 1.08161468 | 7.56008026 |
| 103.563 | 0.88858736 | 3.24362621 | 8.66251973 | 9.16152263 | 1.69770144 | 1.15760468 | 7.60607491 |
| 104.496 | 0.87275911 | 3.3253168  | 8.76444585 | 9.13648834 | 1.56213774 | 1.21186296 | 7.48390777 |
| 105.429 | 0.90354665 | 3.37503835 | 8.7873066  | 9.10703875 | 1.42278716 | 1.25035509 | 7.47332389 |

|         |            |            |            |            |            |            |            |
|---------|------------|------------|------------|------------|------------|------------|------------|
| 106.362 | 0.86396268 | 3.47606741 | 8.43700663 | 9.06678669 | 1.33894366 | 1.34409977 | 7.35383223 |
| 107.295 | 0.88243787 | 3.47917696 | 7.95389959 | 9.00252915 | 1.25561062 | 1.46278621 | 7.30827038 |
| 108.228 | 0.89239736 | 3.44830509 | 7.55086833 | 9.00801612 | 1.20319893 | 1.6364127  | 7.25236072 |
| 109.161 | 0.89738379 | 3.46715996 | 7.1568677  | 8.92815501 | 1.15635895 | 1.83654338 | 7.20349386 |
| 110.094 | 0.89269147 | 3.49215593 | 6.89706347 | 8.89437586 | 1.14463266 | 2.07033691 | 7.1049339  |
| 111.027 | 0.83874978 | 3.50210336 | 6.64704768 | 8.87397119 | 1.11148843 | 2.27762627 | 7.07865124 |
| 111.96  | 0.81265457 | 3.49492229 | 6.55099463 | 8.85583848 | 1.07641456 | 2.51883416 | 6.96285804 |
| 112.893 | 0.81324278 | 3.5465054  | 6.26422482 | 8.83654835 | 1.08351767 | 2.73203227 | 6.9527463  |
| 113.826 | 0.82439207 | 3.52689134 | 6.02911272 | 8.7394976  | 1.07659558 | 3.00650531 | 6.85064526 |
| 114.759 | 1.90910792 | 3.50499971 | 5.79191664 | 8.76105967 | 1.09105522 | 3.28626214 | 6.87012118 |
| 115.692 | 4.47695948 | 3.52081784 | 5.56103568 | 8.69148663 | 1.09356774 | 3.48423385 | 6.72556657 |
| 116.625 | 5.14832293 | 3.52634015 | 5.30154721 | 8.67005316 | 1.09604405 | 3.72848134 | 6.75247875 |
| 117.558 | 5.51301418 | 3.5114216  | 5.03706978 | 8.58281893 | 1.09426284 | 3.95906483 | 6.72474032 |
| 118.491 | 5.70533267 | 3.5116296  | 4.87546574 | 8.65474966 | 1.08861511 | 4.18021703 | 6.60398961 |
| 119.424 | 5.82465944 | 3.54795618 | 4.62450268 | 8.56665809 | 1.11236455 | 4.3343276  | 6.50956091 |
| 120.357 | 5.86189057 | 3.52171223 | 4.42355542 | 8.60313786 | 1.09826694 | 4.54613374 | 6.50814448 |
| 121.29  | 5.99235325 | 3.48352408 | 4.26403536 | 8.56361454 | 1.09615628 | 4.61374354 | 6.54851275 |
| 122.223 | 6.15417831 | 3.5058993  | 4.1115251  | 8.56648663 | 1.10853785 | 4.63817397 | 6.55429651 |
| 123.156 | 6.29049637 | 3.46715996 | 3.9724029  | 8.48182442 | 1.09750305 | 4.64078746 | 6.38987252 |
| 124.089 | 6.38694972 | 3.47537582 | 3.84389012 | 8.4371142  | 1.10307476 | 4.61104483 | 6.42217501 |
| 125.022 | 6.498349   | 3.4827649  | 3.77196085 | 8.36852709 | 1.08631981 | 4.61536276 | 6.27887945 |
| 125.955 | 6.59450824 | 3.43228416 | 3.63694348 | 8.35198045 | 1.07579548 | 4.57894438 | 6.16768964 |
| 126.888 | 6.70240498 | 3.42731305 | 3.56021471 | 8.30559842 | 1.06239297 | 4.51940231 | 6.15317123 |
| 127.821 | 6.77716134 | 3.42883142 | 3.45456268 | 8.30182613 | 1.02025219 | 4.31722629 | 6.13267233 |
| 128.754 | 6.82699892 | 3.37476275 | 3.42374487 | 8.21167695 | 1.02385805 | 4.27702971 | 6.06456563 |
| 129.687 | 6.7786185  | 3.34265331 | 3.37524471 | 8.22496571 | 1.00630302 | 4.24833816 | 5.99665565 |
| 130.62  | 6.87858776 | 3.34341249 | 3.30167351 | 8.16298011 | 0.97731132 | 4.25325266 | 5.90324992 |
| 131.553 | 6.7783244  | 3.30764231 | 3.28481213 | 8.18227023 | 0.94052502 | 4.25294017 | 5.96848442 |
| 132.486 | 6.84019358 | 3.27836161 | 3.21161983 | 8.10549554 | 0.94551385 | 4.18783024 | 5.96683192 |

|         |            |            |            |            |            |            |            |
|---------|------------|------------|------------|------------|------------|------------|------------|
| 133.419 | 6.82318891 | 3.29700329 | 3.20568361 | 8.11235425 | 0.92387869 | 4.12547583 | 5.88231822 |
| 134.352 | 6.82113017 | 3.28229794 | 3.13659615 | 8.08912037 | 0.91437167 | 4.08263735 | 5.88338055 |
| 135.285 | 6.77686724 | 3.25778037 | 3.11468266 | 8.0304784  | 0.88698378 | 4.00352253 | 5.73654391 |
| 136.218 | 6.7135409  | 3.25177447 | 2.99412693 | 8.03519376 | 0.87492805 | 3.96886541 | 5.63157066 |
| 137.151 | 6.77070438 | 3.22346096 | 2.98503315 | 7.93385631 | 0.83828656 | 3.8780467  | 5.62865911 |
| 138.084 | 6.74696202 | 3.18996833 | 2.91758762 | 7.95258916 | 0.82353729 | 3.81759559 | 5.65828612 |
| 139.017 | 6.73259094 | 3.18665599 | 2.88487528 | 7.85549554 | 0.81355601 | 3.7450429  | 5.60713724 |
| 139.95  | 6.72644145 | 3.14273235 | 2.93021787 | 7.90963649 | 0.80434224 | 3.5873814  | 5.55638181 |
| 140.883 | 6.65431868 | 3.10358222 | 2.86447742 | 7.75587277 | 0.79214169 | 3.52210102 | 5.62700661 |
| 141.816 | 6.72263145 | 3.07526871 | 2.90331544 | 7.71103395 | 0.78103086 | 3.41102778 | 5.48430123 |
| 142.749 | 6.64406508 | 3.01263578 | 2.86611936 | 7.69324417 | 0.78252606 | 3.32339072 | 5.43008341 |
| 143.682 | 6.64141812 | 2.97396405 | 2.77998105 | 7.64669067 | 0.76292915 | 3.3115448  | 5.35819956 |
| 144.615 | 6.60272984 | 2.90165929 | 2.73072308 | 7.62311385 | 0.75714022 | 3.27495597 | 5.49032106 |
| 145.548 | 6.59949467 | 2.89275184 | 2.70767288 | 7.55671296 | 0.77265701 | 3.2674848  | 5.39239062 |
| 146.481 | 6.59803751 | 2.8547717  | 2.65033154 | 7.46677812 | 0.75972514 | 3.21393671 | 5.25361977 |
| 147.414 | 6.56636766 | 2.79103119 | 2.59400063 | 7.40290638 | 0.7491284  | 3.12013522 | 5.29505036 |
| 148.347 | 6.6112188  | 2.77528587 | 2.59589517 | 7.35528121 | 0.7522962  | 3.02298165 | 5.39467265 |
| 149.28  | 6.57751694 | 2.76044012 | 2.59179034 | 7.36912723 | 0.72636369 | 2.95261633 | 5.26565943 |
| 150.213 | 6.58630001 | 2.7212172  | 2.62393432 | 7.25068587 | 0.74788663 | 2.96849611 | 5.27435474 |
| 151.146 | 6.59480235 | 2.6861386  | 2.5466372  | 7.25385802 | 0.72792768 | 2.91341401 | 5.18799182 |
| 152.079 | 6.55376121 | 2.6625206  | 2.62058731 | 7.1816701  | 0.74828848 | 2.85830351 | 5.21946805 |
| 153.012 | 6.57369357 | 2.59484377 | 2.59216925 | 7.12242798 | 0.76041663 | 2.78180217 | 5.06000157 |
| 153.945 | 6.47725359 | 2.58510954 | 2.57808652 | 7.12821502 | 0.79210548 | 2.77788194 | 4.99043909 |
| 154.878 | 6.47109073 | 2.55437806 | 2.63896432 | 7.02336248 | 0.77050652 | 2.72498722 | 4.92583412 |
| 155.811 | 6.51095544 | 2.52517017 | 2.61780865 | 7.07047325 | 0.78729767 | 2.67868303 | 4.96289739 |
| 156.744 | 6.48897771 | 2.48981078 | 2.59627408 | 7.00634431 | 0.76067367 | 2.59445486 | 4.81295247 |
| 157.677 | 6.41685494 | 2.45459178 | 2.5568677  | 6.99837106 | 0.77738879 | 2.53516846 | 4.80197513 |
| 158.61  | 6.3280216  | 2.43290815 | 2.48702242 | 6.98152435 | 0.77400377 | 2.49914778 | 4.73386843 |
| 159.543 | 6.37756507 | 2.40259268 | 2.56804547 | 6.85686728 | 0.76216525 | 2.48315437 | 4.61418004 |

|         |            |            |            |            |            |            |            |
|---------|------------|------------|------------|------------|------------|------------|------------|
| 160.476 | 6.3312434  | 2.38146024 | 2.59330597 | 6.8386917  | 0.79574755 | 2.46824044 | 4.5530768  |
| 161.409 | 6.28228814 | 2.34368809 | 2.52156615 | 6.74104081 | 0.79428855 | 2.50980058 | 4.61894082 |
| 162.342 | 6.27965456 | 2.32987713 | 2.50059994 | 6.73825446 | 0.7655901  | 2.52193057 | 4.61418004 |
| 163.275 | 6.25795757 | 2.3374066  | 2.46030944 | 6.71746399 | 0.75728503 | 2.49014261 | 4.57420523 |
| 164.208 | 6.20929642 | 2.3431369  | 2.45917272 | 6.65466392 | 0.75120286 | 2.45446281 | 4.47895027 |
| 165.141 | 6.20519231 | 2.3198621  | 2.44319545 | 6.6570216  | 0.75167712 | 2.39034714 | 4.40128266 |
| 166.074 | 6.14830956 | 2.32905034 | 2.48222292 | 6.57728909 | 0.74027667 | 2.39185274 | 4.38967579 |
| 167.007 | 6.18818764 | 2.31088705 | 2.47388696 | 6.43629973 | 0.73925573 | 2.36657008 | 4.42677841 |
| 167.94  | 6.1761694  | 2.28284913 | 2.45045785 | 6.40625    | 0.74202529 | 2.29390376 | 4.34206799 |
| 168.873 | 6.15651779 | 2.23112562 | 2.45045785 | 6.3441358  | 0.73419449 | 2.25649111 | 4.35056657 |
| 169.806 | 6.08176143 | 2.22960725 | 2.45228923 | 6.26736111 | 0.7343031  | 2.20143742 | 4.16458137 |
| 170.739 | 6.02899616 | 2.18879835 | 2.43094411 | 6.20387517 | 0.73186299 | 2.17643884 | 4.27663676 |
| 171.672 | 6.01609561 | 2.15986085 | 2.45418377 | 6.20070302 | 0.73914712 | 2.1261576  | 4.12858042 |
| 172.605 | 6.00378327 | 2.15937726 | 2.50786233 | 6.12084191 | 0.7375071  | 2.11578888 | 4.20620869 |
| 173.538 | 5.99879684 | 2.13265492 | 2.53981686 | 6.10086591 | 0.72749324 | 2.11314698 | 4.1086717  |
| 174.471 | 5.96185982 | 2.13438129 | 2.47123461 | 6.08037551 | 0.72796388 | 2.12450997 | 4.05402109 |
| 175.404 | 5.9507239  | 2.11394044 | 2.47035049 | 6.0527692  | 0.72989715 | 2.13212317 | 4.05815234 |
| 176.337 | 5.86746521 | 2.07464472 | 2.44098516 | 5.91516632 | 0.7264723  | 2.1318391  | 4.02958766 |
| 177.27  | 5.88358756 | 2.08493534 | 2.42576571 | 5.95627572 | 0.71284896 | 2.10735186 | 3.99602613 |
| 178.203 | 5.84253305 | 2.08106661 | 2.45266814 | 5.88653121 | 0.73098687 | 2.08013749 | 4.01715455 |
| 179.136 | 5.82055533 | 2.0350786  | 2.4630881  | 5.88880316 | 0.71802242 | 2.1037157  | 4.03021719 |
| 180.069 | 5.82230659 | 2.05075113 | 2.43075466 | 5.86629801 | 0.72854676 | 2.10854497 | 3.86059962 |
| 181.002 | 5.77217491 | 2.02596315 | 2.41401958 | 5.83256173 | 0.70119507 | 2.07962616 | 3.83325464 |
| 181.935 | 5.74344612 | 1.94868728 | 2.36577202 | 5.78862311 | 0.72771046 | 2.059258   | 3.76388889 |
| 182.868 | 5.76720185 | 1.95462558 | 2.28999053 | 5.76020233 | 0.71284896 | 2.03227089 | 3.76243311 |
| 183.801 | 5.72702966 | 1.93163158 | 2.32876539 | 5.7129201  | 0.71048125 | 2.07133117 | 3.68932956 |
| 184.734 | 5.69859498 | 1.91236591 | 2.30483107 | 5.66332305 | 0.70119507 | 2.01744219 | 3.64152502 |
| 185.667 | 5.66048153 | 1.91105553 | 2.29055889 | 5.64171811 | 0.71274035 | 1.97326856 | 3.56924772 |
| 186.6   | 5.63028221 | 1.91623464 | 2.28512788 | 5.57758916 | 0.71245072 | 1.95863871 | 3.58270381 |

|         |            |            |            |            |            |            |            |
|---------|------------|------------|------------|------------|------------|------------|------------|
| 187.533 | 5.62706041 | 1.89613699 | 2.26473003 | 5.48778292 | 0.71926058 | 1.96375206 | 3.5066887  |
| 188.466 | 5.57663463 | 1.89150907 | 2.2529839  | 5.48002401 | 0.71372508 | 1.91324357 | 3.47045168 |
| 189.399 | 5.5171183  | 1.89275184 | 2.22904957 | 5.40543553 | 0.72151967 | 1.86787683 | 3.43421467 |
| 190.332 | 5.53148938 | 1.88419279 | 2.19823177 | 5.46832133 | 0.72632749 | 1.86097381 | 3.44314605 |
| 191.265 | 5.49571541 | 1.86837466 | 2.25191033 | 5.35853909 | 0.7232321  | 1.82233964 | 3.36713094 |
| 192.198 | 5.42800422 | 1.85111096 | 2.21086201 | 5.27889232 | 0.71882252 | 1.79697176 | 3.40482373 |
| 193.131 | 5.46054303 | 1.81810193 | 2.22128197 | 5.30907064 | 0.75699541 | 1.76282598 | 3.32117564 |
| 194.064 | 5.49044824 | 1.778879   | 2.21180928 | 5.28986626 | 0.78259846 | 1.70899381 | 3.26420365 |
| 194.997 | 5.4013208  | 1.80926728 | 2.16368803 | 5.18642833 | 0.79756858 | 1.68518834 | 3.24370475 |
| 195.93  | 5.45204069 | 1.78758365 | 2.17739185 | 5.14681927 | 0.82160765 | 1.66425203 | 3.23190116 |
| 196.863 | 5.42565138 | 1.76493284 | 2.2152826  | 5.135631   | 0.83941611 | 1.65331515 | 3.16210261 |
| 197.796 | 5.37846076 | 1.80187821 | 2.19709504 | 5.11552641 | 0.8613047  | 1.64913925 | 3.16107963 |
| 198.729 | 5.35060091 | 1.79338155 | 2.25449953 | 5.04471022 | 0.88927908 | 1.58351798 | 3.1517548  |
| 199.662 | 5.35969146 | 1.78744326 | 2.23814335 | 5.0258059  | 0.92235091 | 1.63959434 | 3.14431854 |
| 200.595 | 5.38343382 | 1.7963507  | 2.21401958 | 4.98139575 | 0.9725035  | 1.61516391 | 3.16997167 |
| 201.528 | 5.2852292  | 1.77045515 | 2.24704768 | 4.87379973 | 1.01365955 | 1.57192773 | 3.14349229 |
| 202.461 | 5.33740625 | 1.7500819  | 2.19134828 | 4.85819616 | 1.05379466 | 1.55502528 | 3.17618823 |
| 203.394 | 5.32128391 | 1.72964105 | 2.13154405 | 4.86685528 | 1.10824823 | 1.55792285 | 3.16603714 |
| 204.327 | 5.32128391 | 1.74290082 | 2.11651405 | 4.84113512 | 1.14638129 | 1.56235441 | 3.11779981 |
| 205.26  | 5.28727457 | 1.76369006 | 2.00467319 | 4.87264232 | 1.1926746  | 1.56127493 | 3.16729619 |
| 206.193 | 5.31307568 | 1.73882929 | 1.98408589 | 4.75977366 | 1.25732305 | 1.58883018 | 3.06189015 |
| 207.126 | 5.29021563 | 1.75188107 | 2.0178718  | 4.74056927 | 1.2608203  | 1.59641498 | 3.08341202 |
| 208.059 | 5.29226101 | 1.72964105 | 2.04477423 | 4.78034979 | 1.27320187 | 1.58576217 | 3.09977967 |
| 208.992 | 5.19346818 | 1.74255763 | 2.04553205 | 4.70794753 | 1.29024644 | 1.53968525 | 3.08238905 |
| 209.925 | 5.2491745  | 1.73178341 | 2.05127881 | 4.58011831 | 1.27338288 | 1.54650304 | 3.107452   |
| 210.858 | 5.24154111 | 1.70733863 | 2.05797284 | 4.60305213 | 1.25550201 | 1.5497699  | 3.02958766 |
| 211.791 | 5.20578052 | 1.69567003 | 2.0735712  | 4.59100652 | 1.24857992 | 1.56846202 | 3.09006138 |
| 212.724 | 5.15711937 | 1.70885701 | 2.03403852 | 4.56597222 | 1.21722052 | 1.53406056 | 3.0167611  |
| 213.657 | 5.17675762 | 1.66583815 | 2.07748658 | 4.45528978 | 1.20545803 | 1.54502585 | 3.03910922 |



|         |            |            |            |            |            |            |            |
|---------|------------|------------|------------|------------|------------|------------|------------|
| 214.59  | 5.19580765 | 1.63759223 | 2.13337543 | 4.44791667 | 1.20804295 | 1.54877564 | 3.06251967 |
| 215.523 | 5.11313717 | 1.65181919 | 2.14006947 | 4.39176097 | 1.22534457 | 1.50857906 | 2.9343327  |
| 216.456 | 5.12016898 | 1.64159616 | 2.19115883 | 4.43865741 | 1.18407629 | 1.49394921 | 2.90824677 |
| 217.389 | 5.14392471 | 1.61349065 | 2.10369435 | 4.39437586 | 1.18549908 | 1.51474348 | 2.93700818 |
| 218.322 | 5.05509137 | 1.61224787 | 2.14827913 | 4.33676269 | 1.21827766 | 1.54934379 | 3.02691218 |
| 219.255 | 5.09848535 | 1.64083698 | 2.15213135 | 4.35163752 | 1.18451435 | 1.51752741 | 3.02730563 |
| 220.188 | 5.0632996  | 1.64712367 | 2.14063783 | 4.29368141 | 1.1793445  | 1.51511278 | 3.00889204 |
| 221.121 | 5.1213454  | 1.64470571 | 2.1617935  | 4.23735425 | 1.17096703 | 1.57087665 | 3.0163283  |
| 222.054 | 5.04424956 | 1.62951157 | 2.19671614 | 4.19624486 | 1.19096218 | 1.59635816 | 2.97552723 |
| 222.987 | 5.00584201 | 1.59139103 | 2.15863593 | 4.14566187 | 1.16732497 | 1.58962559 | 2.94220176 |
| 223.92  | 4.99001377 | 1.58897827 | 2.12188191 | 4.11076818 | 1.18298656 | 1.59968184 | 2.95959238 |
| 224.853 | 5.01697793 | 1.58027362 | 2.20789391 | 4.15222051 | 1.14583462 | 1.58655758 | 2.97926503 |
| 225.786 | 4.92990923 | 1.52944969 | 2.17088728 | 4.08620542 | 1.13884011 | 1.57723993 | 2.98587504 |
| 226.719 | 4.92258332 | 1.56308271 | 2.21844016 | 4.08590535 | 1.12263546 | 1.61772058 | 2.94157224 |
| 227.652 | 4.94339799 | 1.55934918 | 2.25468898 | 4.07420267 | 1.12255944 | 1.55530936 | 2.98363236 |
| 228.585 | 4.96743446 | 1.56653546 | 2.21180928 | 4.0774177  | 1.11214371 | 1.56261008 | 2.90533522 |
| 229.518 | 4.96480088 | 1.55666083 | 2.24894222 | 4.04050926 | 1.06931145 | 1.57959775 | 2.9790683  |
| 230.451 | 4.92462869 | 1.59498417 | 2.25784654 | 3.99858539 | 1.08216728 | 1.59797739 | 2.92603085 |
| 231.384 | 4.89678221 | 1.57737727 | 2.27622356 | 3.96090535 | 1.06279121 | 1.607153   | 2.92418162 |
| 232.317 | 4.86130235 | 1.56487668 | 2.26435112 | 3.93055556 | 1.08359008 | 1.59252315 | 2.85812087 |
| 233.25  | 4.76074489 | 1.56584387 | 2.22608147 | 3.95940501 | 1.07386584 | 1.59400034 | 2.86661945 |
| 234.183 | 4.73876716 | 1.5524437  | 2.3167035  | 3.95143176 | 1.07065821 | 1.61249361 | 2.80594901 |
| 235.116 | 4.74022432 | 1.55873039 | 2.27736028 | 3.96965021 | 1.06188251 | 1.6474348  | 2.78419106 |
| 236.049 | 4.74785771 | 1.56556827 | 2.28127566 | 3.86201132 | 1.0603149  | 1.64939492 | 2.80406043 |
| 236.982 | 4.68687085 | 1.5463026  | 2.2203347  | 3.95276063 | 1.06792848 | 1.64726436 | 2.80138495 |
| 237.915 | 4.67544082 | 1.51032442 | 2.2301863  | 3.85691015 | 1.03740537 | 1.63257769 | 2.80118823 |
| 238.848 | 4.64406508 | 1.5465054  | 2.24130092 | 3.85395233 | 1.03995771 | 1.65297426 | 2.75912811 |
| 239.781 | 4.58807802 | 1.55845479 | 2.34474266 | 3.84126372 | 1.02837262 | 1.68564286 | 2.77156122 |
| 240.714 | 4.65550847 | 1.53663077 | 2.26359331 | 3.82017318 | 0.98514212 | 1.67598432 | 2.67485049 |

|         |            |            |            |            |            |            |            |
|---------|------------|------------|------------|------------|------------|------------|------------|
| 241.647 | 4.58690159 | 1.56791343 | 2.2782444  | 3.81893004 | 0.95855433 | 1.65075848 | 2.68995908 |
| 242.58  | 4.57869337 | 1.57647768 | 2.24654247 | 3.81014232 | 0.93925066 | 1.68797227 | 2.76388889 |
| 243.513 | 4.58162106 | 1.56038916 | 2.27306599 | 3.75904492 | 0.91830698 | 1.67433669 | 2.77341045 |
| 244.446 | 4.55640817 | 1.53994831 | 2.26454057 | 3.71789266 | 0.89827563 | 1.65899665 | 2.67898174 |
| 245.379 | 4.58162106 | 1.52799892 | 2.40846227 | 3.72436557 | 0.8581731  | 1.64115675 | 2.69743469 |
| 246.312 | 4.53354812 | 1.51418796 | 2.33305968 | 3.69157236 | 0.86214462 | 1.64678143 | 2.61126849 |
| 247.245 | 4.55289226 | 1.50528051 | 2.34865804 | 3.68171296 | 0.85129083 | 1.66482018 | 2.62952471 |
| 248.178 | 4.45498175 | 1.53110846 | 2.3163246  | 3.60052298 | 0.82251635 | 1.65609909 | 2.6634797  |
| 249.111 | 4.48429876 | 1.51522274 | 2.33343859 | 3.62765775 | 0.83493775 | 1.62178285 | 2.65643689 |
| 250.044 | 4.48048875 | 1.52357899 | 2.31840859 | 3.62795782 | 0.8180742  | 1.62107267 | 2.6015502  |
| 250.977 | 4.44324425 | 1.49153715 | 2.29908431 | 3.57308813 | 0.7931228  | 1.64413954 | 2.59761568 |
| 251.91  | 4.45468765 | 1.48995117 | 2.37467635 | 3.58333333 | 0.78653378 | 1.6420942  | 2.60941926 |
| 252.843 | 4.46816304 | 1.50935724 | 2.3444269  | 3.5988083  | 0.78176217 | 1.64939492 | 2.67134876 |
| 253.776 | 4.43562424 | 1.48428847 | 2.38825387 | 3.60335219 | 0.7891187  | 1.64635532 | 2.66989298 |
| 254.709 | 4.42419422 | 1.4594953  | 2.35850963 | 3.59675069 | 0.75681077 | 1.60908471 | 2.71793359 |
| 255.642 | 4.38050613 | 1.4827701  | 2.37284496 | 3.57656036 | 0.76868549 | 1.63817397 | 2.70302172 |
| 256.575 | 4.39956954 | 1.46578199 | 2.42349226 | 3.54406722 | 0.74428076 | 1.62340208 | 2.67052251 |
| 257.508 | 4.42360601 | 1.45314621 | 2.38193874 | 3.53450789 | 0.75619169 | 1.6227203  | 2.6241344  |
| 258.441 | 4.40337954 | 1.45880371 | 2.47533944 | 3.51393176 | 0.74869034 | 1.61368672 | 2.58353006 |
| 259.374 | 4.34240605 | 1.44506554 | 2.43391222 | 3.54471022 | 0.74974748 | 1.57312085 | 2.63778722 |
| 260.307 | 4.38022539 | 1.44243959 | 2.45361541 | 3.48825446 | 0.76587972 | 1.56255326 | 2.58789739 |
| 261.24  | 4.38432951 | 1.41481767 | 2.42222924 | 3.51718964 | 0.75622789 | 1.51383444 | 2.56861819 |
| 262.173 | 4.36438378 | 1.41709523 | 2.42557626 | 3.51251715 | 0.73849184 | 1.50829498 | 2.54831602 |
| 263.106 | 4.34533374 | 1.42254993 | 2.4227976  | 3.46274863 | 0.74009565 | 1.48869382 | 2.55972616 |
| 264.039 | 4.27907972 | 1.37994186 | 2.4203347  | 3.49159808 | 0.75925088 | 1.48434748 | 2.54855209 |
| 264.972 | 4.27291686 | 1.37083162 | 2.42500789 | 3.48105281 | 0.76005459 | 1.48309755 | 2.60257318 |
| 265.905 | 4.24301164 | 1.34368809 | 2.41850332 | 3.48100995 | 0.75506214 | 1.46284302 | 2.56074913 |
| 266.838 | 4.28758205 | 1.34714083 | 2.4177455  | 3.47509431 | 0.76274813 | 1.44602579 | 2.51955461 |
| 267.771 | 4.27262276 | 1.34141053 | 2.4532365  | 3.46257716 | 0.74686931 | 1.45182092 | 2.54855209 |

|         |            |            |            |            |            |            |            |
|---------|------------|------------|------------|------------|------------|------------|------------|
| 268.704 | 4.22835983 | 1.32311204 | 2.44212188 | 3.44371571 | 0.75677456 | 1.45594    | 2.45908089 |
| 269.637 | 4.1978664  | 1.32794276 | 2.43669087 | 3.36616941 | 0.76125655 | 1.46156468 | 2.54564054 |
| 270.57  | 4.18056762 | 1.32359563 | 2.46738238 | 3.32377401 | 0.73823479 | 1.4680984  | 2.45077904 |
| 271.503 | 4.09438124 | 1.29783528 | 2.4584149  | 3.34357853 | 0.74628643 | 1.47639339 | 2.44664778 |
| 272.436 | 4.17060813 | 1.29839167 | 2.47811809 | 3.34139232 | 0.76628158 | 1.51184592 | 2.44810356 |
| 273.369 | 4.13630469 | 1.31164624 | 2.46757183 | 3.29385288 | 0.76671964 | 1.50085222 | 2.4423198  |
| 274.302 | 4.13748112 | 1.30377358 | 2.45494159 | 3.29805384 | 0.75160472 | 1.50232941 | 2.39797765 |
| 275.235 | 4.14187934 | 1.29576571 | 2.45209978 | 3.29492455 | 0.7624223  | 1.50068178 | 2.39073812 |
| 276.168 | 4.12399235 | 1.28374872 | 2.48089675 | 3.29119513 | 0.75943552 | 1.51619226 | 2.36941297 |
| 277.101 | 4.13893828 | 1.25157167 | 2.43372277 | 3.26131687 | 0.73546885 | 1.5190046  | 2.3808231  |
| 278.034 | 4.12544951 | 1.27663524 | 2.44913167 | 3.22749486 | 0.74406354 | 1.50374979 | 2.35926188 |
| 278.967 | 4.11724129 | 1.25281445 | 2.42443953 | 3.16045096 | 0.74923701 | 1.53891824 | 2.39345294 |
| 279.9   | 4.11490181 | 1.27021335 | 2.47142406 | 3.22856653 | 0.75790411 | 1.53812283 | 2.31991659 |
| 280.833 | 4.06828603 | 1.26330787 | 2.48443322 | 3.12362826 | 0.74715894 | 1.5490029  | 2.35139282 |
| 281.766 | 4.07239014 | 1.26006313 | 2.5316072  | 3.16803841 | 0.74712273 | 1.52539628 | 2.40006295 |
| 282.699 | 4.06037191 | 1.2382391  | 2.46214083 | 3.16460905 | 0.76191183 | 1.54138969 | 2.42469311 |
| 283.632 | 4.06447602 | 1.24880532 | 2.43599621 | 3.18458505 | 0.75786791 | 1.51667519 | 2.37747875 |
| 284.565 | 4.05803243 | 1.25115568 | 2.50413641 | 3.19024348 | 0.76318619 | 1.50346571 | 2.41186654 |
| 285.498 | 4.03252543 | 1.25184727 | 2.50337859 | 3.22492284 | 0.7624223  | 1.51775467 | 2.42803746 |
| 286.431 | 4.05715011 | 1.24452579 | 2.47256078 | 3.15655007 | 0.73849184 | 1.52397591 | 2.3511961  |
| 287.364 | 4.04014545 | 1.2499129  | 2.50078939 | 3.13901749 | 0.75033036 | 1.53400375 | 2.41351904 |
| 288.297 | 4.06418192 | 1.23727712 | 2.47016104 | 3.12109911 | 0.78409005 | 1.52085109 | 2.36878344 |
| 289.23  | 4.07737658 | 1.26510184 | 2.50243132 | 3.12028464 | 0.80401641 | 1.5178683  | 2.45845137 |
| 290.163 | 4.07649426 | 1.26593383 | 2.49150616 | 3.14304698 | 0.79826006 | 1.52249872 | 2.38597734 |
| 291.096 | 4.027539   | 1.26075472 | 2.55112093 | 3.08329047 | 0.78041178 | 1.50508494 | 2.32054611 |
| 292.029 | 4.03926313 | 1.25688598 | 2.4836754  | 3.07621742 | 0.77793546 | 1.45048577 | 2.31000157 |
| 292.962 | 4.07121372 | 1.2443178  | 2.52453426 | 3.12688615 | 0.79366947 | 1.45537185 | 2.26278722 |
| 293.895 | 4.0888066  | 1.27256371 | 2.48279129 | 3.05208333 | 0.80073638 | 1.46772911 | 2.36115046 |
| 294.828 | 4.06506424 | 1.25675078 | 2.54910009 | 3.06447188 | 0.79352466 | 1.45071303 | 2.38806264 |

|         |            |            |            |            |            |            |            |
|---------|------------|------------|------------|------------|------------|------------|------------|
| 295.761 | 4.04132187 | 1.23934668 | 2.54240606 | 3.03365055 | 0.80121064 | 1.4377024  | 2.32011331 |
| 296.694 | 4.01053434 | 1.21324313 | 2.49112725 | 3.07557442 | 0.80547178 | 1.44835521 | 2.35595688 |
| 297.627 | 3.81617047 | 1.18099329 | 2.51304073 | 3.07193073 | 0.82576018 | 1.45531504 | 2.47501574 |
| 298.56  | 4.00232611 | 1.17029187 | 2.51304073 | 3.07518861 | 0.82350109 | 1.43812852 | 2.54646679 |
| 299.493 | 3.98766092 | 1.1688411  | 2.513988   | 3.09747942 | 0.81712567 | 1.44460542 | 2.53962071 |
| 300.426 | 3.93137976 | 1.12726781 | 2.50729397 | 3.05761317 | 0.80823773 | 1.45062781 | 2.53859773 |
| 301.359 | 3.83903052 | 1.13790163 | 2.54404799 | 3.03120713 | 0.79428855 | 1.46534288 | 2.59076959 |
| 302.292 | 3.84900338 | 1.13873361 | 2.57177139 | 3.06558642 | 0.80419742 | 1.45054258 | 2.88050834 |
| 303.225 | 3.83961873 | 1.10172065 | 2.579539   | 3.06267147 | 0.79997249 | 1.43741833 | 3.17847025 |
| 304.158 | 3.84635643 | 1.11083609 | 2.57044522 | 3.09319273 | 0.79967924 | 1.42412363 | 3.25220334 |
| 305.091 | 3.82495354 | 1.0990271  | 2.63656457 | 3.05478395 | 0.78846342 | 1.45451963 | 3.40832546 |
| 306.024 | 3.78098472 | 1.09730073 | 2.54777392 | 3.00510117 | 0.7844919  | 1.44366797 | 3.43382121 |
| 306.957 | 3.77629239 | 1.11373244 | 2.6252605  | 2.98915466 | 0.79155881 | 1.42597012 | 3.51683979 |
| 307.89  | 3.72498429 | 1.11428883 | 2.62058731 | 2.96960734 | 0.79286937 | 1.14808818 | 3.67630626 |
| 308.823 | 3.74726949 | 1.10358222 | 2.61465109 | 3.00981653 | 0.7836194  | 1.24609397 | 3.68087032 |
| 309.756 | 3.76280363 | 1.08783689 | 2.56059362 | 3.03125    | 0.80816532 | 1.59380149 | 3.79453887 |
| 310.689 | 3.78039651 | 1.05766181 | 2.61559836 | 3.00205761 | 0.81417509 | 2.40128402 | 3.83844822 |
| 311.622 | 3.8240846  | 1.06332451 | 2.55314177 | 2.95987654 | 0.85085277 | 3.25535481 | 3.91796506 |
| 312.555 | 3.84342874 | 1.06276812 | 2.59532681 | 2.96587791 | 0.83726925 | 3.51031191 | 3.84092698 |
| 313.488 | 3.7950617  | 1.0350786  | 2.58402273 | 2.94414438 | 0.84021983 | 3.6052497  | 3.95813661 |
| 314.421 | 3.78098472 | 1.05075633 | 2.60221029 | 3.00428669 | 0.85081657 | 3.5862451  | 3.96828769 |
| 315.354 | 3.76280363 | 1.0523423  | 2.55876224 | 3.02207647 | 0.82903659 | 3.59439805 | 4.02274158 |
| 316.287 | 3.73232357 | 1.05303389 | 2.59141143 | 2.99528464 | 0.83271486 | 3.57238225 | 4.02108908 |
| 317.22  | 3.76486237 | 1.08859608 | 2.59368488 | 2.95404664 | 0.82317164 | 3.54675871 | 4.05299811 |
| 318.153 | 3.77541008 | 1.06774443 | 2.58383328 | 2.97612311 | 0.84466199 | 3.49758536 | 4.05091281 |
| 319.086 | 3.7440477  | 1.05648663 | 2.51101989 | 2.95486111 | 0.83289588 | 3.46224646 | 4.16564369 |
| 320.019 | 3.78450062 | 1.06532648 | 2.61149353 | 2.90805041 | 0.82080393 | 3.40795978 | 4.1701684  |
| 320.952 | 3.7730706  | 1.0639433  | 2.60593622 | 2.93668553 | 0.84510005 | 3.32395887 | 4.24929178 |
| 321.885 | 3.8020935  | 1.07147277 | 2.59867382 | 2.95014575 | 0.83359098 | 3.30677234 | 4.27104973 |

|         |            |            |            |            |            |            |            |
|---------|------------|------------|------------|------------|------------|------------|------------|
| 322.818 | 3.77482187 | 1.04895716 | 2.62450268 | 2.92939815 | 0.82583259 | 3.24149196 | 4.2002282  |
| 323.751 | 3.8091253  | 1.07181596 | 2.59513735 | 2.91872428 | 0.84557069 | 3.2233964  | 4.24016368 |
| 324.684 | 3.77951419 | 1.07464992 | 0          | 2.92061043 | 0.84338763 | 3.0976365  | 4.19751338 |
| 325.617 | 3.80853709 | 1.06270052 | 0          | 2.88211591 | 0.8439705  | 3.06013863 | 4.22485836 |
| 326.55  | 3.79153243 | 1.06069856 | 0          | 2.91199417 | 0.86374481 | 3.01014147 | 4.07369374 |
| 327.483 | 3.75019718 | 1.06670445 | 0          | 2.84872257 | 0.85158046 | 2.91636839 | 4.21431382 |
| 328.416 | 3.75488951 | 1.05303389 | 0          | 2.88220165 | 0.84156659 | 2.84685529 | 4.20105445 |
| 329.349 | 3.71824659 | 1.07257515 | 0          | 2.85043724 | 0.89441273 | 2.79111982 | 4.22568461 |
| 330.282 | 3.67779367 | 1.05648663 | 0          | 2.85708162 | 0.8690993  | 2.74833816 | 4.1797293  |
| 331.215 | 3.73085304 | 1.05662703 | 0          | 2.84083505 | 0.85475188 | 2.68621101 | 4.22466163 |
| 332.148 | 3.73085304 | 1.05531145 | 0          | 2.8388203  | 0.84214947 | 2.63962275 | 4.14679729 |
| 333.081 | 3.68863548 | 1.0640837  | 0          | 2.79916838 | 0.83034715 | 2.57721152 | 4.13829871 |
| 334.014 | 3.68219189 | 1.05682982 | 0          | 2.81738683 | 0.82386312 | 2.55795125 | 4.10556342 |
| 334.947 | 3.63879791 | 1.06035536 | 0          | 2.78287894 | 0.82998512 | 2.47008693 | 4.07408719 |
| 335.88  | 3.686296   | 1.07299114 | 0          | 2.76984739 | 0.82728797 | 2.44736095 | 4.16005666 |
| 336.813 | 3.65169846 | 1.04612841 | 0          | 2.76067387 | 0.83566544 | 2.42321459 | 4.03808624 |
| 337.746 | 3.56608692 | 1.04709559 | 0          | 2.74361283 | 0.83078522 | 2.37435373 | 4.16623387 |
| 338.679 | 3.67104261 | 1.06297612 | 0          | 2.76363169 | 0.88603525 | 2.31884552 | 4.07015266 |
| 339.612 | 3.61886555 | 1.04972154 | 0          | 2.75857339 | 0.89969481 | 2.28893245 | 4.17744728 |
| 340.545 | 3.64084328 | 1.06221693 | 0          | 2.80765604 | 0.92271294 | 2.26697347 | 4.05547686 |
| 341.478 | 3.61710092 | 1.0756847  | 0          | 2.81142833 | 0.93061615 | 2.21299926 | 4.07015266 |
| 342.411 | 3.60420037 | 1.09619315 | 0          | 2.78587963 | 0.95086834 | 2.18348389 | 3.99437362 |
| 343.344 | 3.68863548 | 1.08549173 | 0          | 2.85695302 | 0.94095946 | 2.15570138 | 4.07491344 |
| 344.277 | 3.67104261 | 1.08818528 | 0          | 2.75578704 | 0.93557239 | 2.13141299 | 4.01613157 |
| 345.21  | 3.66137722 | 1.08424895 | 0          | 2.48070988 | 0.91353537 | 2.09411397 | 3.97096317 |
| 346.143 | 3.71942302 | 1.06891441 | 0          | 2.31815844 | 0.91273528 | 2.04525311 | 3.86185867 |
| 347.076 | 3.69244549 | 1.07257515 | 0          | 2.51937586 | 0.91087804 | 2.05150276 | 3.94570349 |
| 348.009 | 3.69743192 | 1.06353251 | 0          | 2.78613683 | 0.91167814 | 2.02176013 | 3.97076645 |
| 348.942 | 3.69772603 | 1.04688759 | 0          | 2.78566529 | 0.89783757 | 1.99377876 | 3.88070507 |

|         |            |            |   |            |            |            |            |
|---------|------------|------------|---|------------|------------|------------|------------|
| 349.875 | 3.63673917 | 1.05758901 | 0 | 3.05902778 | 0.89678043 | 1.95917846 | 3.86992446 |
| 350.808 | 3.65052204 | 1.04509362 | 0 | 3.23096708 | 0.89532505 | 1.90563036 | 3.91859459 |
| 351.741 | 3.64700614 | 1.04260807 | 0 | 3.35193759 | 0.89190021 | 1.89051758 | 3.92170286 |
| 352.674 | 3.65843616 | 1.0409493  | 0 | 3.44131516 | 0.89911193 | 1.85813306 | 3.75188857 |
| 353.607 | 3.65258078 | 1.00427953 | 0 | 3.46257716 | 0.89477838 | 1.85679791 | 3.78604029 |
| 354.54  | 3.67339545 | 0.98867459 | 0 | 3.48092421 | 0.87900817 | 1.79350605 | 3.69432641 |
| 355.473 | 3.63088379 | 0.97720879 | 0 | 3.49069787 | 0.91739466 | 1.77518323 | 3.71750079 |
| 356.406 | 3.6349879  | 0.95090244 | 0 | 3.48010974 | 0.91859661 | 1.75103687 | 3.68995908 |
| 357.339 | 3.62970736 | 0.95635715 | 0 | 3.50184328 | 0.89040863 | 1.71018692 | 3.67174221 |
| 358.272 | 3.67016029 | 0.94910328 | 0 | 3.48152435 | 0.91022276 | 1.69961934 | 3.68043752 |
| 359.205 | 3.65140436 | 0.93639989 | 0 | 3.47856653 | 0.91641354 | 1.68300097 | 3.67713251 |
| 360.138 | 3.60889269 | 0.92520969 | 0 | 3.44727366 | 0.92285775 | 1.65180956 | 3.56240164 |
| 361.071 | 3.58163443 | 0.91402468 | 0 | 3.45297497 | 0.93072838 | 1.61362991 | 3.57668398 |
| 362.004 | 3.61857145 | 0.91360869 | 0 | 3.45220336 | 0.92883132 | 1.62675416 | 3.50090494 |
| 362.937 | 3.59159392 | 0.91215791 | 0 | 3.48358196 | 0.93593443 | 1.5835748  | 3.53899119 |
| 363.87  | 3.5801639  | 0.91319789 | 0 | 3.46840706 | 0.92697408 | 1.55403102 | 3.39321687 |
| 364.803 | 3.59746267 | 0.91809621 | 0 | 3.44358711 | 0.89896712 | 1.54593489 | 3.43775574 |
| 365.736 | 3.57372031 | 0.9301808  | 0 | 3.41345165 | 0.92679306 | 1.50664735 | 3.3975842  |
| 366.669 | 3.56257102 | 0.9067708  | 0 | 3.37890089 | 0.95665727 | 1.47383671 | 3.41206327 |
| 367.602 | 3.57195567 | 0.89413502 | 0 | 3.41752401 | 0.94991981 | 1.45332652 | 3.43441139 |
| 368.535 | 3.57635389 | 0.91678583 | 0 | 3.38100137 | 0.94099929 | 1.43500369 | 3.39860718 |
| 369.468 | 3.58309159 | 0.91954698 | 0 | 3.34696502 | 0.93863158 | 1.39977842 | 3.31700504 |
| 370.401 | 3.53062043 | 0.90974515 | 0 | 3.39218964 | 0.92988846 | 1.39557412 | 3.34187126 |
| 371.334 | 3.57635389 | 0.91243351 | 0 | 3.353738   | 0.94190799 | 1.4011988  | 3.37004249 |
| 372.267 | 3.49368341 | 0.78861844 | 0 | 3.38022977 | 0.93633629 | 1.39756264 | 3.3306972  |
| 373.2   | 3.51976525 | 0.37987427 | 0 | 3.34014918 | 0.92828465 | 1.38392705 | 3.29815864 |
| 374.133 | 3.53706402 | 0.32497881 | 0 | 3.35343793 | 0.9411803  | 1.3940117  | 3.34104501 |
| 375.066 | 3.52152989 | 1.10814254 | 0 | 3.35120885 | 0.93979733 | 1.38912562 | 3.30956878 |
| 375.999 | 3.50305469 | 1.45666655 | 0 | 3.36316872 | 0.94282032 | 1.36412704 | 3.26609223 |

|         |            |            |   |            |            |            |            |
|---------|------------|------------|---|------------|------------|------------|------------|
| 376.932 | 3.52064757 | 1.65292157 | 0 | 3.28472222 | 0.93152847 | 1.3529629  | 3.23190116 |
| 377.865 | 3.5224122  | 1.69414646 | 0 | 3.24112654 | 0.93677435 | 1.35233794 | 3.18177526 |
| 378.798 | 3.47286874 | 1.73620334 | 0 | 3.21630658 | 0.91670317 | 1.3510596  | 3.21037929 |
| 379.731 | 3.45556996 | 1.79207118 | 0 | 3.20507545 | 0.93812111 | 1.34907108 | 3.18551306 |
| 380.664 | 3.45264227 | 1.76403326 | 0 | 3.15436385 | 0.93633629 | 1.34054883 | 3.1538401  |
| 381.597 | 3.44500889 | 1.79455673 | 0 | 3.1663666  | 0.93874019 | 1.35972388 | 3.12444917 |
| 382.53  | 3.44325762 | 1.76369006 | 0 | 3.15342078 | 0.94631395 | 1.34267939 | 3.11429808 |
| 383.463 | 3.45409943 | 1.73185101 | 0 | 3.16589506 | 0.94059743 | 1.37557525 | 3.16686339 |
| 384.396 | 3.4743259  | 1.75201627 | 0 | 3.17866941 | 0          | 1.39494915 | 3.17618823 |
| 385.329 | 3.42947475 | 1.70768183 | 0 | 3.18046982 | 0          | 1.3913414  | 3.20270696 |
| 386.262 | 3.43416708 | 1.69062612 | 0 | 3.17511145 | 0          | 1.36574626 | 3.10206169 |
| 387.195 | 3.40045185 | 1.72280837 | 0 | 3.18981481 | 0          | 1.36276348 | 3.09977967 |
| 388.128 | 3.43709477 | 1.69546204 | 0 | 3.11964163 | 0          | 1.37656951 | 3.1037142  |
| 389.061 | 3.37816665 | 1.68910775 | 0 | 3.12281379 | 0          | 1.3708028  | 3.18118508 |
| 389.994 | 3.35560071 | 1.73931288 | 0 | 3.05709877 | 0          | 1.37818874 | 3.15816808 |
| 390.927 | 3.37319359 | 1.72971385 | 0 | 3.05366941 | 0          | 1.40125561 | 3.10993075 |
| 391.86  | 3.37523896 | 1.72321916 | 0 | 3.06434328 | 0          | 1.43832737 | 3.14077746 |
| 392.793 | 3.32657781 | 1.75063829 | 0 | 3.03785151 | 0          | 1.471138   | 3.06291313 |
| 393.726 | 3.34445143 | 1.7559526  | 0 | 3.07968964 | 0          | 1.47306971 | 3.11595058 |
| 394.659 | 3.34884965 | 1.74000447 | 0 | 3.05838477 | 0          | 1.51212999 | 3.09419263 |
| 395.592 | 3.34621606 | 1.77549906 | 0 | 3.0304784  | 0          | 1.52156127 | 2.98465534 |
| 396.525 | 3.34943786 | 1.75091388 | 0 | 3.04633916 | 0          | 1.50943128 | 3.03993547 |
| 397.458 | 3.38110771 | 1.75450182 | 0 | 3.01564643 | 0          | 1.55062212 | 3.06543122 |
| 398.391 | 3.34884965 | 1.79455673 | 0 | 2.99361283 | 0          | 1.57235384 | 3.05465061 |
| 399.324 | 3.33800783 | 1.85601448 | 0 | 3.00861626 | 0          | 1.57945571 | 2.94322474 |
| 400.257 | 3.36116199 | 1.87970007 | 0 | 3.02490569 | 0          | 1.61255042 | 2.98756689 |
| 401.19  | 3.34387658 | 1.8953778  | 0 | 3.01427469 | 0          | 1.58726777 | 2.94861505 |
| 402.123 | 3.35530661 | 1.9591183  | 0 | 3.05096879 | 0          | 1.62198171 | 2.96041863 |
| 403.056 | 3.29198027 | 1.99164374 | 0 | 2.99074074 | 0          | 1.64090109 | 2.87177369 |

|         |            |            |   |            |   |            |            |
|---------|------------|------------|---|------------|---|------------|------------|
| 403.989 | 3.33097603 | 1.98024554 | 0 | 2.99112654 | 0 | 1.64891199 | 2.92024709 |
| 404.922 | 3.31279494 | 2.06636126 | 0 | 2.94058642 | 0 | 1.66899608 | 2.91485678 |
| 405.855 | 3.35911661 | 2.14639828 | 0 | 2.96077675 | 0 | 1.70870973 | 2.87511804 |
| 406.788 | 3.31542853 | 2.18928194 | 0 | 3.00222908 | 0 | 1.73569684 | 2.89187913 |
| 407.721 | 3.37759181 | 2.2560592  | 0 | 2.98353909 | 0 | 1.74194648 | 2.83018571 |
|         |            | 2.34452007 | 0 | 2.96416324 | 0 | 1.77041077 | 2.87740006 |
|         |            | 2.49899382 | 0 | 2.95777606 | 0 | 1.78626214 | 2.90242367 |
|         |            | 2.89095788 | 0 | 2.92026749 | 0 | 1.80367593 | 2.82601511 |
|         |            | 3.16414038 | 0 | 2.91872428 | 0 | 1.85898528 | 2.86701291 |
|         |            | 3.43960564 | 0 | 2.9113083  | 0 | 1.8605477  | 2.81362134 |
|         |            | 3.77141713 | 0 | 2.92609739 | 0 | 1.86537697 | 2.87138023 |
|         |            | 4.22380415 | 0 | 2.89433299 | 0 | 1.8898074  | 2.81960183 |
|         |            | 4.5058993  | 0 | 2.89334705 | 0 | 1.90997671 | 2.89707271 |
|         |            | 4.76313367 | 0 | 2.95186043 | 0 | 1.91253338 | 2.87594429 |
|         |            | 5.00427433 | 0 | 2.906893   | 0 | 1.95281518 | 2.96663519 |
|         |            | 5.07146757 | 0 | 2.91443759 | 0 | 1.97247315 | 2.9268571  |
|         |            | 4.99481569 | 0 | 2.90955075 | 0 | 1.98369411 | 2.92335537 |
|         |            | 5.11842276 | 0 | 2.90286351 | 0 | 1.99227317 | 2.93681146 |
|         |            | 5.02810032 | 0 | 2.85429527 | 0 | 2.01528322 | 2.96415644 |
|         |            | 4.872103   | 0 | 2.82527435 | 0 | 2.05187205 | 3.03186969 |
|         |            | 4.84793382 | 0 | 2.83972051 | 0 | 2.08431339 | 3.00889204 |
|         |            | 4.73578734 | 0 | 2.84559328 | 0 | 2.09036418 | 2.94924457 |
|         |            | 4.66783491 | 0 | 2.90097737 | 0 | 2.15206522 | 2.97304847 |
|         |            | 4.57412733 | 0 | 2.86977023 | 0 | 2.17686495 | 2.92563739 |
|         |            | 4.45099864 | 0 | 2.85506687 | 0 | 2.20967559 | 2.97800598 |
|         |            | 4.30874469 | 0 | 2.85999657 | 0 | 2.23325379 | 2.99563267 |
|         |            | 4.25674558 | 0 | 2.92253944 | 0 | 2.28092154 | 2.88857413 |
|         |            | 4.25384403 | 0 | 2.87071331 | 0 | 2.32302142 | 2.96250393 |
|         |            | 4.10502779 | 0 | 2.82608882 | 0 | 2.31549344 | 2.89250866 |



|            |   |            |   |            |            |
|------------|---|------------|---|------------|------------|
| 3.98570025 | 0 | 2.84057785 | 0 | 2.34432703 | 2.94054926 |
| 3.97713599 | 0 | 2.80954218 | 0 | 2.36137151 | 2.90387945 |
| 3.90055691 | 0 | 2.85832476 | 0 | 2.41307312 | 2.93496223 |
| 3.83052971 | 0 | 0          | 0 | 2.43074257 | 2.94963802 |
| 3.84462147 | 0 | 0          | 0 | 2.4259133  | 2.87488196 |
| 3.70982419 | 0 | 0          | 0 | 2.44687802 | 0          |
| 3.53704156 | 0 | 0          | 0 | 2.44801432 | 3.39223324 |
| 3.55575604 | 0 | 0          | 0 | 2.44920743 | 3.40690903 |
| 3.45272501 | 0 | 0          | 0 | 2.45980342 | 3.37924929 |
| 3.32731877 | 0 | 0          | 0 | 2.43983296 | 3.40238432 |
| 3.29023821 | 0 | 0          | 0 | 2.45653656 | 3.42953258 |
| 3.14073038 | 0 | 0          | 0 | 2.47613772 | 3.52101039 |
| 3.00448232 | 0 | 0          | 0 | 2.5421851  | 3.50259679 |
| 3.03611338 | 0 | 0          | 0 | 2.5288904  | 3.53989613 |
| 2.98183671 | 0 | 0          | 0 | 2.55582069 | 3.60225842 |
| 2.92928122 | 0 | 0          | 0 | 2.60084654 | 3.69727731 |
| 2.89233585 | 0 | 0          | 0 | 2.6694506  | 3.73359301 |
| 2.78005418 | 0 | 0          | 0 | 2.6956707  | 3.7546034  |
| 2.71272574 | 0 | 0          | 0 | 2.71084029 | 3.86890148 |
| 2.65982705 | 0 | 0          | 0 | 2.79336401 | 3.88141328 |
| 2.64014539 | 0 | 0          | 0 | 2.80239759 | 3.93885741 |
| 2.57102298 | 0 | 0          | 0 | 2.84387251 | 3.96214983 |
| 2.58621192 | 0 | 0          | 0 | 2.86068973 | 4.0434372  |
| 2.55085773 | 0 | 0          | 0 | 2.91937958 | 4.04225685 |
| 2.50196297 | 0 | 0          | 0 | 2.91852736 | 4.14896128 |
| 2.4827649  | 0 | 0          | 0 | 2.99556843 | 4.09092698 |
| 2.46799195 | 0 | 0          | 0 | 2.95366741 | 4.23178313 |
| 2.47233908 | 0 | 0          | 0 | 3.05536617 | 4.24291785 |
| 2.46605758 | 0 | 0          | 0 | 3.06340549 | 4.2449638  |

|            |   |   |   |            |            |
|------------|---|---|---|------------|------------|
| 2.39748116 | 0 | 0 | 0 | 3.06488268 | 4.22816336 |
| 2.2906542  | 0 | 0 | 0 | 3.05275268 | 4.28765345 |
| 2.2326492  | 0 | 0 | 0 | 3.09570479 | 4.33762197 |
| 2.1804421  | 0 | 0 | 0 | 3.13178229 | 4.38719704 |
| 2.13852562 | 0 | 0 | 0 | 3.16757571 | 4.38818067 |
| 2.16455637 | 0 | 0 | 0 | 3.16828589 | 4.49008499 |
| 2.13859322 | 0 | 0 | 0 | 3.24186126 | 4.49217029 |
| 2.05061593 | 0 | 0 | 0 | 3.24336685 | 4.4744649  |
| 2.0522019  | 0 | 0 | 0 | 3.23058349 | 4.54567989 |
| 2.02817312 | 0 | 0 | 0 | 3.28200102 | 4.55343091 |
| 2.07789466 | 0 | 0 | 0 | 3.2875973  | 4.59128108 |
| 2.05897219 | 0 | 0 | 0 | 3.31492529 | 4.59710419 |
| 2.04798997 | 0 | 0 | 0 | 3.31912959 | 4.58478911 |
| 2.08300097 | 0 | 0 | 0 | 3.31023805 | 4.6237803  |
| 2.06552927 | 0 | 0 | 0 | 3.33838986 | 4.63027227 |
| 2.01850648 | 0 | 0 | 0 | 3.3430771  | 4.63086245 |
| 2.03272824 | 0 | 0 | 0 | 3.34350321 | 4.62393768 |
| 1.99537208 | 0 | 0 | 0 | 3.33850349 | 4.64038401 |
| 2.01960886 | 0 | 0 | 0 | 3.35037782 | 4.64620711 |
| 2.01553733 | 0 | 0 | 0 | 3.35458213 | 4.59875669 |
| 1.97714119 | 0 | 0 | 0 | 3.32032271 | 4.68413598 |
| 1.96277384 | 0 | 0 | 0 | 3.38196693 | 4.62079005 |
| 1.94129821 | 0 | 0 | 0 | 3.3362309  | 4.68543437 |
| 1.88508718 | 0 | 0 | 0 | 3.38290438 | 4.68681146 |
| 1.85504729 | 0 | 0 | 0 | 3.38389864 | 4.63428549 |
| 1.82929214 | 0 | 0 | 0 | 3.34597466 | 4.67744728 |
| 1.82929214 | 0 | 0 | 0 | 3.37713766 | 4.69074599 |
| 1.85587928 | 0 | 0 | 0 | 3.38673939 | 4.7123859  |
| 1.78295573 | 0 | 0 | 0 | 3.4023635  | 4.69239849 |

|            |   |   |   |            |            |
|------------|---|---|---|------------|------------|
| 1.75843815 | 0 | 0 | 0 | 3.3879325  | 4.73284545 |
| 1.74835553 | 0 | 0 | 0 | 3.41713539 | 4.73599308 |
| 1.67723115 | 0 | 0 | 0 | 3.41940799 | 4.73402581 |
| 1.70492068 | 0 | 0 | 0 | 3.41798761 | 4.7629446  |
| 1.77238951 | 0 | 0 | 0 | 3.43886711 | 4.77998111 |
| 1.72888186 | 0 | 0 | 0 | 3.45116755 | 4.7658955  |
| 1.71127497 | 0 | 0 | 0 | 3.44099767 | 4.74740321 |
| 1.71548689 | 0 | 0 | 0 | 3.42764616 | 4.7220255  |
| 1.69587283 | 0 | 0 | 0 | 3.40932333 | 4.69290998 |
| 1.65009282 | 0 | 0 | 0 | 3.3883018  | 4.72851747 |
| 1.63186193 | 0 | 0 | 0 | 3.41401057 | 4.80968681 |
| 1.59525976 | 0 | 0 | 0 | 3.47261519 | 4.75889204 |
| 1.60748475 | 0 | 0 | 0 | 3.43594114 | 4.78214511 |
| 1.56867262 | 0 | 0 | 0 | 3.45272996 | 4.7541706  |
| 1.57696128 | 0 | 0 | 0 | 3.43253224 | 4.68130312 |
| 1.53311043 | 0 | 0 | 0 | 3.3799216  | 4.74307523 |
| 1.49858302 | 0 | 0 | 0 | 3.42452133 | 4.77671545 |
| 1.49595707 | 0 | 0 | 0 | 3.44880973 | 4.80524079 |
| 1.54167468 | 0 | 0 | 0 | 3.46940515 | 4.77525968 |
| 1.48117892 | 0 | 0 | 0 | 3.44775865 | 4.77659742 |
| 1.50210336 | 0 | 0 | 0 | 3.4487245  | 4.73815707 |
| 1.4826973  | 0 | 0 | 0 | 3.4209704  | 4.76322002 |
| 1.44886148 | 0 | 0 | 0 | 3.43906596 | 4.7287142  |
| 1.39444442 | 0 | 0 | 0 | 3.4141526  | 4.7658955  |
| 1.38471018 | 0 | 0 | 0 | 3.44099767 | 4.78057129 |
| 1.32283645 | 0 | 0 | 0 | 3.45159366 | 4.78958137 |
| 1.30971707 | 0 | 0 | 0 | 3.45809897 | 4.80169972 |
| 1.30142842 | 0 | 0 | 0 | 3.46684847 | 4.81173277 |
| 1.26911097 | 0 | 0 | 0 | 3.47409238 | 4.83396286 |

|            |   |   |   |            |            |
|------------|---|---|---|------------|------------|
| 1.27421728 | 0 | 0 | 0 | 3.49014261 | 4.78399433 |
| 1.25716158 | 0 | 0 | 0 | 3.45406511 | 4.7495672  |
| 1.23789591 | 0 | 0 | 0 | 3.42920857 | 4.75889204 |
| 1.23161442 | 0 | 0 | 0 | 3.43594114 | 4.77250551 |
| 1.19798139 | 0 | 0 | 0 | 3.44577013 | 4.73316021 |
| 1.18223607 | 0 | 0 | 0 | 3.41736265 | 4.77474819 |
| 1.18286005 | 0 | 0 | 0 | 3.44738935 | 4.72371734 |
| 1.13175533 | 0 | 0 | 0 | 3.41054486 | 4.71899591 |
| 1.12588983 | 0 | 0 | 0 | 3.40713596 | 4.70479226 |
| 1.11684199 | 0 | 0 | 0 | 3.39688086 | 4.71840573 |
| 1.10379021 | 0 | 0 | 0 | 3.40670985 | 4.72938307 |
| 1.11836036 | 0 | 0 | 0 | 3.41463553 | 4.7474819  |
| 1.14619029 | 0 | 0 | 0 | 3.42770297 | 4.74575071 |
| 1.12326388 | 0 | 0 | 0 | 3.42645304 | 4.68279824 |
| 1.10172065 | 0 | 0 | 0 | 3.38100108 | 4.6877164  |
| 1.12913458 | 0 | 0 | 0 | 3.38455201 | 4.688582   |
| 1.10199625 | 0 | 0 | 0 | 3.38517698 | 4.71218917 |
| 1.10233944 | 0 | 0 | 0 | 3.40222146 | 4.68307365 |
| 1.08203899 | 0 | 0 | 0 | 3.38119993 | 4.69153289 |
| 1.0641513  | 0 | 0 | 0 | 3.38730754 | 4.65690903 |
| 1.05082393 | 0 | 0 | 0 | 3.36230896 | 4.688582   |
| 1.04536922 | 0 | 0 | 0 | 3.38517698 | 4.67854895 |
| 1.04398604 | 0 | 0 | 0 | 3.37793307 | 4.69468052 |
| 1.05393347 | 0 | 0 | 0 | 3.38958014 | 4.68653604 |
| 1.03652937 | 0 | 0 | 0 | 3.38369979 | 4.64813503 |
| 1.03604578 | 0 | 0 | 0 | 3.35597409 | 4.66997167 |
| 1.01436215 | 0 | 0 | 0 | 3.37174024 | 4.6605288  |
| 1.01588053 | 0 | 0 | 0 | 3.36492245 | 4.63971514 |
| 1.00697308 | 0 | 0 | 0 | 3.34989489 | 4.66902738 |

|            |   |   |   |            |            |
|------------|---|---|---|------------|------------|
| 0.99074416 | 0 | 0 | 0 | 3.37105846 | 4.6923198  |
| 0.9997244  | 0 | 0 | 0 | 3.38787569 | 4.65029902 |
| 1.00939104 | 0 | 0 | 0 | 3.3575365  | 4.63263299 |
| 1.06325171 | 0 | 0 | 0 | 3.34478155 | 4.58766132 |
| 1.07920504 | 0 | 0 | 0 | 3.3123118  | 4.61067831 |
| 1.07913744 | 0 | 0 | 0 | 3.32893017 | 4.62692792 |
| 1.09688473 | 0 | 0 | 0 | 3.34066246 | 4.65612213 |
| 1.13016936 | 0 | 0 | 0 | 3.36174081 | 4.63467894 |
| 1.13168773 | 0 | 0 | 0 | 3.34625874 | 4.61469153 |
| 1.11497522 | 0 | 0 | 0 | 3.33182774 | 4.62944602 |
| 1.1279594  | 0 | 0 | 0 | 3.34248054 | 0          |
| 1.14052758 | 0 | 0 | 0 | 0          | 0          |
| 1.09819511 | 0 | 0 | 0 | 0          | 0          |
| 1.0874209  | 0 | 0 | 0 | 0          | 0          |
| 1.05144792 | 0 | 0 | 0 | 0          | 0          |
| 1.06242493 | 0 | 0 | 0 | 0          | 0          |
| 1.07015719 | 0 | 0 | 0 | 0          | 0          |
| 1.06214933 | 0 | 0 | 0 | 0          | 0          |
| 1.06511848 | 0 | 0 | 0 | 0          | 0          |
| 1.06898721 | 0 | 0 | 0 | 0          | 0          |
| 1.06594527 | 0 | 0 | 0 | 0          | 0          |
| 1.07444192 | 0 | 0 | 0 | 0          | 0          |
| 1.08770169 | 0 | 0 | 0 | 0          | 0          |
| 1.07050559 | 0 | 0 | 0 | 0          | 0          |
| 1.10675936 | 0 | 0 | 0 | 0          | 0          |
| 1.10337422 | 0 | 0 | 0 | 0          | 0          |
| 1.10219904 | 0 | 0 | 0 | 0          | 0          |
| 1.08176339 | 0 | 0 | 0 | 0          | 0          |
| 1.07478511 | 0 | 0 | 0 | 0          | 0          |

|            |   |   |   |   |   |
|------------|---|---|---|---|---|
| 1.0815554  | 0 | 0 | 0 | 0 | 0 |
| 1.06325171 | 0 | 0 | 0 | 0 | 0 |
| 1.09646874 | 0 | 0 | 0 | 0 | 0 |
| 1.0874209  | 0 | 0 | 0 | 0 | 0 |
| 1.07381793 |   |   |   | 0 |   |

**Figure 5B**

| <b>WT</b>  | <b>WT + ISO</b> | <b>WT + ISO +<br/>Propranolol</b> | <b>2808D</b> | <b>2808D+S107</b> | <b>WT+ S107</b> | <b>WT+ISO+S107</b> |
|------------|-----------------|-----------------------------------|--------------|-------------------|-----------------|--------------------|
|            | 3.76224189      | 7.2071251                         | 7.51677852   | 7.72888889        | 4.37481481      | 3.762345           |
| 2.64212963 | 1.72532189      | 6.23204787                        | 4.53073967   | 10.3076923        | 5.29457364      | 5.232345           |
| 2.88596491 | 1.85462754      | 6.43878273                        | 3.88222698   | 11.981982         | 4.24489796      | 5.2345             |
| 3.22823529 | 3.11615245      | 6.73156682                        | 4.59479554   | 6.94610778        | 3.423423        | 5.37481481         |
| 2.80264609 | 1.46401515      | 6.78065499                        | 4.7164592    | 3.04347826        | 3.55788097      | 4.04371585         |
| 4.31838565 | 3.07142857      | 9.39454355                        | 3.77234043   | 4.57414449        | 6.0532          | 3.33632287         |
| 3.24466223 | 1.44664511      | 3.97927807                        | 3.07705363   | 2.73221757        | 4.336           | 3.32453425         |
| 6.22897196 | 3.214           | 6.61810756                        | 1.54812734   | 6.77835052        | 4.69            | 5.2345235          |
| 4.4314759  | 2.345           | 9.3531746                         | 6.23809524   | 4.66208791        | 5.79235423      | 3.23452345         |
| 4.23469994 | 4.213           | 10.25                             | 4.89268293   | 3.42823894        | 6.74345213      | 4.62354            |
| 2.34155421 | 1.89            | 7.70226537                        | 3.01152637   | 6.03108808        | 4.54134523      | 5.32469            |
| 2.68464961 | 1.567           | 8.42124542                        | 2.83473313   | 6.71987382        | 3.8223423       | 4.2568             |
| 3.32028924 | 1.689           | 5.67                              |              | 6.99438202        | 5.893425342     | 6.53247            |
| 2.71641791 | 2.213           | 9.39673913                        | 1.62743473   | 6.38495575        | 6.212134123     | 8.230894           |
| 3.2096486  | 2.894           | 7.48028674                        | 3.2027972    |                   | 5.346534        | 5.8937             |
| 6.616      | 3.789           | 6.672                             | 4.72019465   | 6.28313253        | 6.32786885      | 5.32871            |
| 4.53051948 | 2.867           | 8.36403509                        | 1.75983437   | 4.1671159         | 3.6835879       | 7.7635627          |
| 4.20059347 | 3.357           | 8.61538462                        | 2.15466667   | 4.14669927        | 6.41225166      | 6.321447           |
| 3.44949066 | 3.792           | 4.67                              | 1.82897727   | 5.69871795        | 4.63131         | 4.256457           |
| 6.6888361  | 3.85505155      | 5.76                              | 2.02329133   | 4.42345277        | 7.22761194      | 5.231247           |
| 2.8245804  | 4.20795756      | 6.74                              | 2.10732538   | 4.68014706        | 4.39320388      | 8.2145663          |
| 3.37455986 | 3.18080495      | 4.541                             | 1.79096045   | 5.57567568        | 4.66381766      | 4.786924           |
| 3.49238095 | 2.6005988       | 4.82                              | 2.02713987   | 5.96835443        | 6.47122507      | 5.321147           |
| 3.83505155 | 3.25777778      | 3.89                              | 1.79108635   | 5.13577023        | 3.34562345      | 4.02329133         |
| 4.50795756 | 4.26097561      | 4.21                              | 2.35561497   | 7.71287129        | 4.456345        | 4.10732538         |
| 3.38080495 | 3.55384615      | 5.11                              | 1.75         | 6.61081081        | 2.21342134      | 4.732452345        |
| 2.7005988  |                 | 3.782                             | 3.93293413   | 3.90873786        | 6.5648567       | 4.23452345         |

|            |       |            |            |            |             |
|------------|-------|------------|------------|------------|-------------|
| 3.05777778 | 4.21  | 5.22074468 | 5.7275641  | 4.2345234  | 5.314654    |
| 4.56097561 | 3.44  | 2.68333333 | 7.23986486 | 3.789567   | 6.3124475   |
| 3.15384615 | 4.11  | 1.17401961 | 5.20506912 | 6.23452354 | 3.345324512 |
|            | 5.678 | 3.29768271 | 6.16816817 |            | 4.4325234   |
| 2.76976629 | 4.567 | 1.95951417 | 5.38738739 |            | 6.32147     |
| 4.23352903 | 6.324 | 1.79742173 | 4.57007126 |            | 3.221457    |
| 4.67605634 | 4.445 | 1.40178571 | 7.03125    |            | 5.2564124   |
| 5.37481481 | 5.778 | 1.83673469 | 5.71270718 |            | 4.2254478   |
| 5.04371585 |       | 1.82931727 | 7.66772152 |            | 3.214878    |
| 3.33632287 |       | 1.93137255 | 5.89473684 |            | 4.21477     |
| 3.63131313 |       | 1.4361949  | 4.80962343 |            | 3.21478     |
| 5.22761194 |       | 1.51136364 | 5.81661891 |            | 5.23127     |
| 3.39320388 |       | 2.07276995 | 3.91923077 |            |             |
| 2.66381766 |       |            | 3.85067712 |            |             |
| 3.29457364 |       | 1.54761905 | 5.75       |            |             |
| 5.32786885 |       | 2.71181319 | 5.08371041 |            |             |
| 2.68358797 |       | 1.40109523 | 6.485623   |            |             |
| 5.41225166 |       | 1.75143403 | 4.94004796 |            |             |
| 5.47122507 |       | 3.60167131 | 5.48082596 |            |             |
| 2.24489796 |       | 1.51047031 | 6.04034582 |            |             |
| 2.55788097 |       | 2.72289157 | 5.88235294 |            |             |
| 2.41609267 |       | 4.07692308 | 6.41237113 |            |             |
| 4.8707552  |       | 4.14507772 | 6.04792332 |            |             |
| 4.36279548 |       | 2.33479769 | 4.98704104 |            |             |
|            |       | 1.70094325 | 5.46282974 |            |             |
|            |       | 2.65374176 | 4.16159696 |            |             |
|            |       | 2.59802539 | 3.80573951 |            |             |
|            |       | 3.5501845  |            |            |             |
|            |       | 4.1580756  |            |            |             |



2.31130614

5.22167488

3.14089232

3.78765432

2.55865646

2.15946206

3.06949289

3.57142857

2.4429498

1.84077543

3.62429379

1.75554871

3.27341772

1.76416778

3.01030928
