# Supplementary material for: Heart failure-induced cognitive dysfunction is mediated by intracellular Ca2+ leak through ryanodine receptor type 2
Source: PubMed Central journal article supplement (PMC10400432; doi:10.1038/s41593-023-01377-6), 2023-07-10
Supplement: 41593_2023_1377_MOESM9_ESM.pdf [file 41593_2023_1377_MOESM9_ESM.pdf]

Figure 6

| Comparison<br>(group1/group2) | AVG<br>Log2<br>Ratio | Pvalue   | Qvalue   | UniProtIds               |
|-------------------------------|----------------------|----------|----------|--------------------------|
| MI / SHAM                     | -2.5993              | 8.51E-11 | 4.7E-08  | Q3UQ44                   |
| MI / SHAM                     | -2.5378              | 0.003918 | 0.003459 | Q99JP6;Q99JP6-2          |
| MI / SHAM                     | -2.47437             | 1.88E-05 | 9.7E-05  | Q8K3Z9                   |
| MI / SHAM                     | -2.12531             | 0.072035 | 0.032504 | Q02788                   |
| MI / SHAM                     | -2.06366             | 0.036449 | 0.018757 | Q8R4I7                   |
| MI / SHAM                     | -2.05492             | 2.01E-08 | 1.39E-06 | Q3UH99-2                 |
| MI / SHAM                     | -2.04179             | 3.29E-08 | 1.65E-06 | Q8BHI7                   |
| MI / SHAM                     | -1.9994              | 2.59E-09 | 3.91E-07 | Q9D7X1                   |
| MI / SHAM                     | -1.96153             | 7.97E-06 | 5.52E-05 | P05532;P05532-2          |
| MI / SHAM                     | -1.93124             | 0.001595 | 0.00182  | Q8R100                   |
| MI / SHAM                     | -1.90022             | 1.72E-08 | 1.32E-06 | Q9WUK6                   |
| MI / SHAM                     | -1.88796             | 0.067346 | 0.030814 | Q5RJH6;Q5RJH6-2;Q5RJH6-3 |
| MI / SHAM                     | -1.87535             | 2.3E-08  | 1.41E-06 | P23818                   |
| MI / SHAM                     | -1.86746             | 0.005215 | 0.004235 | O88895                   |
| MI / SHAM                     | -1.80849             | 0.03938  | 0.01986  | Q5SUF2;Q5SUF2-2;Q5SUF2-3 |
| MI / SHAM                     | -1.7386              | 2.53E-06 | 2.65E-05 | O89029                   |
| MI / SHAM                     | -1.71143             | 6.21E-09 | 6.3E-07  | Q8BGN8-2                 |
| MI / SHAM                     | -1.69902             | 2.51E-08 | 1.49E-06 | Q9Z140                   |
| MI / SHAM                     | -1.69793             | 1.92E-09 | 3.48E-07 | G3X9J0                   |
| MI / SHAM                     | -1.68834             | 7.99E-07 | 1.26E-05 | O35449                   |
| MI / SHAM                     | -1.67828             | 2.14E-07 | 5.21E-06 | Q91WG7                   |
| MI / SHAM                     | -1.66643             | 3.34E-10 | 1.11E-07 | Q8VHW2                   |
| MI / SHAM                     | -1.64639             | 0.000402 | 0.0007   | Q60571                   |
| MI / SHAM                     | -1.63933             | 9.88E-06 | 6.42E-05 | Q9ERZ4                   |
| MI / SHAM                     | -1.63473             | 5.86E-08 | 2.37E-06 | POC7L0                   |
| MI / SHAM                     | -1.58456             | 1.95E-09 | 3.48E-07 | Q8BRV5                   |
| MI / SHAM                     | -1.57965             | 0.000902 | 0.001247 | Q0KK59                   |
| MI / SHAM                     | -1.5571              | 1.56E-07 | 4.57E-06 | P97333                   |
| MI / SHAM                     | -1.52929             | 0.000179 | 0.000413 | Q69Z38                   |
| MI / SHAM                     | -1.5198              | 0.006421 | 0.004945 | O35671                   |
| MI / SHAM                     | -1.48324             | 6.09E-05 | 0.000206 | Q96DY5;Q96DY5-2;Q96DY5-3 |
| MI / SHAM                     | -1.47884             | 2.07E-05 | 0.000103 | Q0VE82                   |
| MI / SHAM                     | -1.44083             | 0.059097 | 0.02769  | Q8K0V4                   |
| MI / SHAM                     | -1.4344              | 2.7E-07  | 6.14E-06 | Q8VCI8-2                 |
| MI / SHAM                     | -1.41827             | 0.031874 | 0.016919 | Q8K1S1                   |
| MI / SHAM                     | -1.40965             | 5.34E-10 | 1.47E-07 | Q03137                   |
| MI / SHAM                     | -1.3862              | 4.26E-09 | 5.43E-07 | P35436                   |

|           |          |          |          |                                   |
|-----------|----------|----------|----------|-----------------------------------|
| MI / SHAM | -1.36637 | 2.07E-07 | 5.21E-06 | Q8R071                            |
| MI / SHAM | -1.36215 | 3.27E-07 | 6.98E-06 | Q9QVP9                            |
| MI / SHAM | -1.3578  | 0.051262 | 0.024634 | O88622;O88622-2                   |
| MI / SHAM | -1.34985 | 0.007116 | 0.005359 | Q6IE26                            |
| MI / SHAM | -1.32039 | 4.03E-09 | 5.43E-07 | P59281;P59281-2                   |
| MI / SHAM | -1.32019 | 0.001874 | 0.002034 | Q3TBW2                            |
| MI / SHAM | -1.30831 | 0.062883 | 0.02912  | Q6P5H2;Q6P5H2-2                   |
| MI / SHAM | -1.29673 | 1E-06    | 1.43E-05 | Q0VGY8                            |
| MI / SHAM | -1.29167 | 0.06215  | 0.028821 | Q3TGW2                            |
| MI / SHAM | -1.28519 | 8.03E-06 | 5.54E-05 | O70507                            |
| MI / SHAM | -1.28439 | 0.001292 | 0.001571 | Q8BLS7                            |
| MI / SHAM | -1.26254 | 0.00654  | 0.005017 | A2ALI5                            |
| MI / SHAM | -1.25329 | 8.28E-07 | 1.29E-05 | Q9ET80                            |
| MI / SHAM | -1.25326 | 7.67E-07 | 1.23E-05 | O54983                            |
| MI / SHAM | -1.253   | 0.005093 | 0.004159 | P54754                            |
| MI / SHAM | -1.22184 | 8.54E-07 | 1.29E-05 | Q7TME0                            |
| MI / SHAM | -1.21619 | 0.00012  | 0.00032  | Q8BKR5                            |
| MI / SHAM | -1.20976 | 0.040824 | 0.020467 | Q99KG3;Q99KG3-2;Q99KG3-3          |
| MI / SHAM | -1.20759 | 2.39E-10 | 9.88E-08 | O08967                            |
| MI / SHAM | -1.20151 | 0.008748 | 0.006299 | Q3UFT3                            |
| MI / SHAM | -1.19891 | 0.023214 | 0.013156 | Q9QZH6                            |
| MI / SHAM | -1.19009 | 0.055203 | 0.026224 | Q68EF8                            |
| MI / SHAM | -1.1759  | 0.019931 | 0.011717 | Q64737                            |
| MI / SHAM | -1.17068 | 2.39E-06 | 2.53E-05 | Q7TT15;Q7TT15-2                   |
| MI / SHAM | -1.15726 | 0.011723 | 0.007762 | P26048                            |
| MI / SHAM | -1.15034 | 2.71E-07 | 6.14E-06 | Q5U4C3                            |
| MI / SHAM | -1.14741 | 0.009628 | 0.00676  | Q8BJ34;Q8BJ34-3;Q8BJ34-4;Q8BJ34-6 |
| MI / SHAM | -1.13572 | 7.18E-05 | 0.000228 | Q5QNQ6                            |
| MI / SHAM | -1.13421 | 0.020384 | 0.01189  | Q9D0V7                            |
| MI / SHAM | -1.12157 | 0.105552 | 0.044454 | Q8C3P7                            |
| MI / SHAM | -1.11517 | 0.10172  | 0.043103 | Q9D9M2;Q9D9M2-2                   |
| MI / SHAM | -1.10881 | 4.37E-08 | 1.9E-06  | Q9CPW4                            |
| MI / SHAM | -1.10085 | 2.95E-05 | 0.000129 | Q2PFD7;Q2PFD7-2;Q2PFD7-5          |
| MI / SHAM | -1.09475 | 2.29E-08 | 1.41E-06 | Q3TBL6                            |
| MI / SHAM | -1.09209 | 3.25E-06 | 3.1E-05  | P97492                            |
| MI / SHAM | -1.08605 | 0.000262 | 0.000519 | Q8K097-2                          |
| MI / SHAM | -1.06396 | 1.9E-07  | 5.16E-06 | Q61097;Q61097-2                   |
| MI / SHAM | -1.06304 | 7.9E-07  | 1.26E-05 | Q3UHB1                            |
| MI / SHAM | -1.0628  | 4.07E-05 | 0.000156 | Q920P5                            |
| MI / SHAM | -1.05267 | 0.000257 | 0.000512 | Q570Y9                            |
| MI / SHAM | -1.05252 | 1.93E-06 | 2.24E-05 | O08914                            |

|           |          |          |          |                          |
|-----------|----------|----------|----------|--------------------------|
| MI / SHAM | -1.05021 | 0.042073 | 0.020992 | Q61183;Q61183-3;Q61183-4 |
| MI / SHAM | -1.04799 | 6.37E-05 | 0.000213 | Q60625                   |
| MI / SHAM | -1.04411 | 1.71E-05 | 9.15E-05 | Q5DTT2;Q5DTT2-3          |
| MI / SHAM | -1.04403 | 0.000495 | 0.000814 | O54929                   |
| MI / SHAM | -1.04263 | 0.009183 | 0.00652  | Q9JJ69;Q9JJ69-2          |
| MI / SHAM | -1.03896 | 2.55E-05 | 0.000117 | Q0VBF8                   |
| MI / SHAM | -1.03133 | 0.008774 | 0.006306 | P31001                   |
| MI / SHAM | -1.02887 | 5.36E-06 | 4.32E-05 | Q9Z2W9                   |
| MI / SHAM | -1.02628 | 0.001001 | 0.00133  | Q8JZU0                   |
| MI / SHAM | -1.02309 | 4.69E-05 | 0.000172 | F6SEU4                   |
| MI / SHAM | -1.01917 | 3.55E-06 | 3.3E-05  | P23819-4                 |
| MI / SHAM | -1.01365 | 0.084449 | 0.036964 | Q8BRK9;Q8BRK9-2          |
| MI / SHAM | -1.01213 | 0.000407 | 0.000706 | Q8K0L9;Q8K0L9-2          |
| MI / SHAM | -1.00752 | 9.94E-06 | 6.43E-05 | P58871                   |
| MI / SHAM | -1.00661 | 1.67E-06 | 2.01E-05 | Q80YA9                   |
| MI / SHAM | -1.00224 | 1.56E-05 | 8.51E-05 | Q8BIZ1                   |
| MI / SHAM | -0.9996  | 3.53E-07 | 7.22E-06 | P83093                   |
| MI / SHAM | -0.99783 | 1.21E-05 | 7.21E-05 | Q9D415                   |
| MI / SHAM | -0.99697 | 0.026356 | 0.014573 | Q3TTY5                   |
| MI / SHAM | -0.99125 | 0.060511 | 0.028235 | Q07113                   |
| MI / SHAM | -0.97684 | 0.08677  | 0.037798 | Q8BT14;Q8BT14-2;Q8BT14-3 |
| MI / SHAM | -0.95766 | 0.029226 | 0.015842 | P11679                   |
| MI / SHAM | -0.95704 | 0.000254 | 0.00051  | Q6NSW3;Q6NSW3-2;Q6NSW3-3 |
| MI / SHAM | -0.95426 | 5.38E-06 | 4.32E-05 | Q8BLR2                   |
| MI / SHAM | -0.94837 | 3.89E-08 | 1.79E-06 | P53995                   |
| MI / SHAM | -0.94731 | 0.00309  | 0.002904 | Q9QUN9                   |
| MI / SHAM | -0.94727 | 0.000209 | 0.000453 | Q64444                   |
| MI / SHAM | -0.94614 | 0.000232 | 0.000482 | Q810B9                   |
| MI / SHAM | -0.94159 | 2.58E-05 | 0.000118 | Q6WQJ1                   |
| MI / SHAM | -0.94064 | 0.00039  | 0.000692 | O08747;O08747-2          |
| MI / SHAM | -0.93935 | 6.87E-09 | 6.3E-07  | Q4KML4                   |
| MI / SHAM | -0.92753 | 0.026238 | 0.014517 | Q66T02;Q66T02-2          |
| MI / SHAM | -0.92326 | 2.18E-06 | 2.36E-05 | Q68ED7                   |
| MI / SHAM | -0.92246 | 1.84E-08 | 1.32E-06 | G5E829                   |
| MI / SHAM | -0.91959 | 2.11E-07 | 5.21E-06 | Q62443                   |
| MI / SHAM | -0.91817 | 4.12E-06 | 3.69E-05 | P35438                   |
| MI / SHAM | -0.91699 | 1.87E-05 | 9.7E-05  | Q3TXX4                   |
| MI / SHAM | -0.91165 | 0.000271 | 0.00053  | P27546-4                 |
| MI / SHAM | -0.90883 | 3.38E-07 | 7E-06    | Q60629                   |
| MI / SHAM | -0.9083  | 0.048899 | 0.023737 | Q9JL35                   |
| MI / SHAM | -0.90428 | 3.01E-05 | 0.000129 | Q9WUR9                   |

|           |          |          |          |                          |
|-----------|----------|----------|----------|--------------------------|
| MI / SHAM | -0.90414 | 0.025759 | 0.014289 | Q3UHQ6;Q3UHQ6-2          |
| MI / SHAM | -0.89851 | 0.005724 | 0.004549 | Q3TRR0                   |
| MI / SHAM | -0.89687 | 8.35E-06 | 5.74E-05 | Q9Z1S3                   |
| MI / SHAM | -0.89465 | 0.000363 | 0.000658 | Q9ES46                   |
| MI / SHAM | -0.89159 | 1.02E-05 | 6.5E-05  | A2AV25                   |
| MI / SHAM | -0.89045 | 6.97E-08 | 2.68E-06 | Q8CBF3                   |
| MI / SHAM | -0.88257 | 0.067007 | 0.030721 | Q9CXJ1                   |
| MI / SHAM | -0.87993 | 0.008953 | 0.006389 | Q61210-5                 |
| MI / SHAM | -0.87565 | 0.000399 | 0.000698 | Q8VEL9                   |
| MI / SHAM | -0.87441 | 0.05649  | 0.026683 | Q921R8;Q921R8-2          |
| MI / SHAM | -0.87304 | 3.12E-05 | 0.000131 | P20444                   |
| MI / SHAM | -0.87054 | 2.88E-06 | 2.91E-05 | P63250                   |
| MI / SHAM | -0.8671  | 0.000144 | 0.000358 | P60761                   |
| MI / SHAM | -0.86692 | 0.049696 | 0.024    | PODN89;PODN90;PODN91     |
| MI / SHAM | -0.85728 | 0.000189 | 0.000428 | Q91W43                   |
| MI / SHAM | -0.85122 | 0.002228 | 0.002319 | Q8R2R3                   |
| MI / SHAM | -0.8485  | 0.001287 | 0.001567 | Q8R4F1;Q8R4F1-2;Q8R4F1-3 |
| MI / SHAM | -0.84614 | 9.41E-08 | 3.32E-06 | P70257-1;P70257-2        |
| MI / SHAM | -0.84225 | 0.001273 | 0.001559 | Q9Z2W8                   |
| MI / SHAM | -0.84216 | 0.028007 | 0.015286 | Q9JJ80                   |
| MI / SHAM | -0.84053 | 2.06E-07 | 5.21E-06 | O55033                   |
| MI / SHAM | -0.83282 | 0.055171 | 0.026221 | P48455                   |
| MI / SHAM | -0.83235 | 6.32E-05 | 0.000212 | Q3UHL1                   |
| MI / SHAM | -0.82988 | 0.000217 | 0.000462 | Q8R409                   |
| MI / SHAM | -0.82303 | 0.008887 | 0.006357 | Q8R104                   |
| MI / SHAM | -0.81848 | 0.000154 | 0.000377 | Q9QWW1;Q9QWW1-2          |
| MI / SHAM | -0.81349 | 6.28E-06 | 4.65E-05 | P63318                   |
| MI / SHAM | -0.80444 | 2.38E-05 | 0.000112 | O88737                   |
| MI / SHAM | -0.80159 | 2.85E-05 | 0.000125 | Q80TLO                   |
| MI / SHAM | -0.80048 | 0.002508 | 0.002507 | Q9EPQ7                   |
| MI / SHAM | -0.79805 | 4.33E-07 | 8.14E-06 | Q9JL26                   |
| MI / SHAM | -0.79802 | 0.002713 | 0.002655 | Q9DCH4                   |
| MI / SHAM | -0.79761 | 5.67E-06 | 4.45E-05 | P97384                   |
| MI / SHAM | -0.79196 | 0.008841 | 0.006337 | Q8K0F1                   |
| MI / SHAM | -0.79173 | 0.037217 | 0.019022 | O09159                   |
| MI / SHAM | -0.79028 | 0.112003 | 0.046755 | Q9QXW2;Q9QXW2-2          |
| MI / SHAM | -0.78983 | 0.020246 | 0.011839 | P48381                   |
| MI / SHAM | -0.78735 | 0.034384 | 0.017985 | Q6IFZ6                   |
| MI / SHAM | -0.78649 | 0.001982 | 0.002131 | Q8C7M3-2                 |
| MI / SHAM | -0.7864  | 0.035795 | 0.018513 | Q7TSZ8                   |
| MI / SHAM | -0.78354 | 7.18E-07 | 1.17E-05 | Q8BXR1                   |

|           |          |          |          |                          |
|-----------|----------|----------|----------|--------------------------|
| MI / SHAM | -0.78126 | 0.002573 | 0.002551 | Q3UNH4                   |
| MI / SHAM | -0.77539 | 6.26E-06 | 4.65E-05 | Q9QZF2                   |
| MI / SHAM | -0.77363 | 0.000135 | 0.000346 | P11798                   |
| MI / SHAM | -0.77147 | 0.09209  | 0.0396   | Q61112                   |
| MI / SHAM | -0.76591 | 0.001084 | 0.0014   | Q3V0I2                   |
| MI / SHAM | -0.76244 | 4.85E-06 | 4.1E-05  | Q8C0D4                   |
| MI / SHAM | -0.76061 | 0.004318 | 0.003705 | O70404                   |
| MI / SHAM | -0.75775 | 0.021984 | 0.012587 | Q3UQ84                   |
| MI / SHAM | -0.75742 | 0.00042  | 0.000725 | Q6PDG5;Q6PDG5-2          |
| MI / SHAM | -0.75724 | 2.84E-05 | 0.000125 | Q9QXS6                   |
| MI / SHAM | -0.75514 | 0.000177 | 0.000412 | Q6NXN1;Q6NXN1-2          |
| MI / SHAM | -0.75372 | 0.011604 | 0.007708 | Q8R555                   |
| MI / SHAM | -0.75337 | 0.020028 | 0.011756 | Q62407                   |
| MI / SHAM | -0.7509  | 4.59E-08 | 1.95E-06 | P84075                   |
| MI / SHAM | -0.75064 | 1.89E-05 | 9.7E-05  | O88444                   |
| MI / SHAM | -0.74547 | 0.000138 | 0.000349 | Q9D8W7                   |
| MI / SHAM | -0.7451  | 0.002841 | 0.002741 | Q3TIV5                   |
| MI / SHAM | -0.74461 | 2.19E-07 | 5.25E-06 | Q80VP9                   |
| MI / SHAM | -0.74051 | 0.000817 | 0.001159 | Q80TE7                   |
| MI / SHAM | -0.73974 | 3.67E-07 | 7.33E-06 | Q6PGE7                   |
| MI / SHAM | -0.73801 | 1.26E-06 | 1.66E-05 | P50429                   |
| MI / SHAM | -0.7361  | 5.09E-09 | 5.62E-07 | Q9DC07                   |
| MI / SHAM | -0.7334  | 0.016861 | 0.010298 | Q8R1B5                   |
| MI / SHAM | -0.73062 | 0.049746 | 0.024017 | P02535;P02535-2;P02535-3 |
| MI / SHAM | -0.73003 | 5.87E-05 | 0.000202 | Q8BG39                   |
| MI / SHAM | -0.72947 | 0.113162 | 0.047156 | P09470                   |
| MI / SHAM | -0.72592 | 6.03E-06 | 4.65E-05 | Q9Z0J4;Q9Z0J4-5          |
| MI / SHAM | -0.72361 | 3.06E-05 | 0.00013  | Q8R5H6                   |
| MI / SHAM | -0.72302 | 0.021992 | 0.012587 | Q91XC9                   |
| MI / SHAM | -0.72231 | 0.000159 | 0.000385 | Q80ZF8                   |
| MI / SHAM | -0.72089 | 5.9E-05  | 0.000202 | P55288                   |
| MI / SHAM | -0.71692 | 0.0039   | 0.003445 | P03995                   |
| MI / SHAM | -0.71391 | 5.28E-05 | 0.000186 | B0V2N1;B0V2N1-2;B0V2N1-6 |
| MI / SHAM | -0.71274 | 7.04E-09 | 6.3E-07  | Q812A2                   |
| MI / SHAM | -0.71201 | 0.000256 | 0.000511 | Q3V3V9-2                 |
| MI / SHAM | -0.70986 | 0.021583 | 0.012428 | Q6P2K6                   |
| MI / SHAM | -0.70886 | 4.66E-05 | 0.000171 | Q9Z2D8;Q9Z2D8-2          |
| MI / SHAM | -0.70879 | 0.06992  | 0.031709 | O08648                   |
| MI / SHAM | -0.707   | 7.85E-05 | 0.000241 | P54763;P54763-2;P54763-4 |
| MI / SHAM | -0.70695 | 0.001298 | 0.001576 | Q8BGB5                   |
| MI / SHAM | -0.70443 | 3.26E-08 | 1.65E-06 | Q9WTS5                   |

|           |          |          |          |                          |
|-----------|----------|----------|----------|--------------------------|
| MI / SHAM | -0.70222 | 2.99E-05 | 0.000129 | Q9QZB0                   |
| MI / SHAM | -0.69874 | 0.058875 | 0.027619 | P56528                   |
| MI / SHAM | -0.69873 | 0.017832 | 0.01072  | Q91WV0                   |
| MI / SHAM | -0.69773 | 0.036639 | 0.018796 | Q91VL8                   |
| MI / SHAM | -0.69633 | 8.63E-07 | 1.29E-05 | Q8K4I3                   |
| MI / SHAM | -0.69599 | 5.11E-07 | 9.11E-06 | Q60598                   |
| MI / SHAM | -0.69363 | 1.5E-05  | 8.39E-05 | A2CG49                   |
| MI / SHAM | -0.6934  | 0.009472 | 0.006664 | Q8C3Q5-2                 |
| MI / SHAM | -0.69241 | 3.26E-05 | 0.000134 | Q68EF0                   |
| MI / SHAM | -0.69185 | 2.51E-05 | 0.000115 | Q80Y24                   |
| MI / SHAM | -0.69149 | 1.15E-06 | 1.59E-05 | Q9CVB6                   |
| MI / SHAM | -0.69127 | 0.000959 | 0.001295 | Q3UHC7;Q3UHC7-2;Q3UHC7-3 |
| MI / SHAM | -0.6829  | 0.015725 | 0.009786 | P24788;P24788-2          |
| MI / SHAM | -0.68187 | 0.001625 | 0.001838 | Q80WT0                   |
| MI / SHAM | -0.68149 | 0.007108 | 0.005358 | Q6DFY8                   |
| MI / SHAM | -0.6811  | 0.001306 | 0.001584 | Q8QZT2                   |
| MI / SHAM | -0.6793  | 0.036807 | 0.018859 | Q9JI18                   |
| MI / SHAM | -0.67884 | 4.08E-05 | 0.000156 | Q9Z1T6                   |
| MI / SHAM | -0.67816 | 0.001789 | 0.001965 | Q9R0I7                   |
| MI / SHAM | -0.67697 | 0.078413 | 0.034785 | Q8BP27;Q8BP27-2          |
| MI / SHAM | -0.67685 | 0.036547 | 0.018777 | Q7SIG6                   |
| MI / SHAM | -0.67648 | 7.6E-05  | 0.000235 | Q3UHD9                   |
| MI / SHAM | -0.676   | 0.020626 | 0.012    | Q8K1H1                   |
| MI / SHAM | -0.67311 | 0.004834 | 0.004019 | Q7M6Z0                   |
| MI / SHAM | -0.67059 | 2.22E-05 | 0.000107 | B9EJA2;B9EJA2-4;B9EJA2-5 |
| MI / SHAM | -0.66882 | 0.000162 | 0.000391 | Q3UVX5                   |
| MI / SHAM | -0.66873 | 5.71E-05 | 0.000198 | B1AXH1                   |
| MI / SHAM | -0.66788 | 5.31E-06 | 4.31E-05 | Q8K0S0                   |
| MI / SHAM | -0.66565 | 0.021877 | 0.012549 | Q9JLB9                   |
| MI / SHAM | -0.66416 | 0.000153 | 0.000375 | Q99MD9;Q99MD9-2          |
| MI / SHAM | -0.66264 | 0.004178 | 0.003619 | P12657                   |
| MI / SHAM | -0.66242 | 3.66E-07 | 7.33E-06 | Q6WVG3                   |
| MI / SHAM | -0.66082 | 0.085471 | 0.037351 | Q3URQ0                   |
| MI / SHAM | -0.65854 | 0.003068 | 0.002898 | Q8BTH8                   |
| MI / SHAM | -0.65755 | 0.031909 | 0.016931 | P63166                   |
| MI / SHAM | -0.65501 | 0.033433 | 0.01761  | Q80U12;Q80U12-2          |
| MI / SHAM | -0.65463 | 0.001623 | 0.001837 | Q9DB25                   |
| MI / SHAM | -0.65321 | 0.000385 | 0.000684 | D3YZU1                   |
| MI / SHAM | -0.65278 | 0.000141 | 0.000354 | P26040                   |
| MI / SHAM | -0.64985 | 3.69E-05 | 0.000145 | Q01815;Q01815-2          |
| MI / SHAM | -0.64681 | 0.000596 | 0.000935 | Q8BGC0                   |

|           |          |          |          |                          |
|-----------|----------|----------|----------|--------------------------|
| MI / SHAM | -0.64551 | 0.002337 | 0.002394 | Q641P0                   |
| MI / SHAM | -0.64539 | 2.29E-07 | 5.41E-06 | Q61831;Q61831-2          |
| MI / SHAM | -0.64459 | 0.006095 | 0.004762 | Q32P12;Q32P12-2          |
| MI / SHAM | -0.64306 | 5E-05    | 0.000179 | Q9D5V6                   |
| MI / SHAM | -0.64278 | 0.002358 | 0.002411 | P59644                   |
| MI / SHAM | -0.64222 | 0.021846 | 0.012538 | Q9EPB4                   |
| MI / SHAM | -0.64221 | 5.71E-07 | 9.85E-06 | P28652                   |
| MI / SHAM | -0.64106 | 0.007364 | 0.005498 | O88428                   |
| MI / SHAM | -0.64043 | 0.001932 | 0.002086 | Q61772;Q61772-2;Q61772-3 |
| MI / SHAM | -0.6398  | 0.016362 | 0.01008  | P39038                   |
| MI / SHAM | -0.63877 | 0.009212 | 0.00653  | P10637-3;P10637-4        |
| MI / SHAM | -0.63682 | 0.00167  | 0.001875 | Q9QUS6                   |
| MI / SHAM | -0.63599 | 0.102074 | 0.043218 | Q8R3N6                   |
| MI / SHAM | -0.63482 | 6.05E-06 | 4.65E-05 | Q61220                   |
| MI / SHAM | -0.63456 | 0.002887 | 0.002776 | Q91ZP9                   |
| MI / SHAM | -0.63419 | 0.000213 | 0.000458 | Q9WV32                   |
| MI / SHAM | -0.63327 | 0.021603 | 0.012435 | Q3UHH1;Q3UHH1-2;Q3UHH1-3 |
| MI / SHAM | -0.63169 | 0.00067  | 0.001019 | Q9CQX0                   |
| MI / SHAM | -0.63159 | 0.000372 | 0.000669 | Q62504;Q62504-2;Q62504-3 |
| MI / SHAM | -0.63156 | 0.000293 | 0.000563 | A2AP18-2                 |
| MI / SHAM | -0.63145 | 0.002455 | 0.002476 | Q9JKF1                   |
| MI / SHAM | -0.62865 | 4.42E-07 | 8.22E-06 | P70211;P70211-2          |
| MI / SHAM | -0.62814 | 2.98E-05 | 0.000129 | P08030                   |
| MI / SHAM | -0.62811 | 1.69E-06 | 2.01E-05 | Q64332                   |
| MI / SHAM | -0.62788 | 0.000178 | 0.000413 | P63080                   |
| MI / SHAM | -0.62768 | 0.00019  | 0.00043  | P84086                   |
| MI / SHAM | -0.62698 | 3.37E-07 | 7E-06    | Q8C8N2                   |
| MI / SHAM | -0.62669 | 0.00882  | 0.006328 | Q923T9                   |
| MI / SHAM | -0.62619 | 2.78E-08 | 1.55E-06 | Q8BYM5                   |
| MI / SHAM | -0.62586 | 0.006623 | 0.005061 | Q6P5U7                   |
| MI / SHAM | -0.62263 | 0.080061 | 0.035402 | E9Q1P8                   |
| MI / SHAM | -0.62138 | 3.82E-05 | 0.000147 | Q9R1V4                   |
| MI / SHAM | -0.62045 | 5.17E-06 | 4.24E-05 | P59999                   |
| MI / SHAM | -0.62028 | 0.000772 | 0.001122 | Q61290                   |
| MI / SHAM | -0.61937 | 0.001797 | 0.001973 | Q9WVK4                   |
| MI / SHAM | -0.61902 | 4.17E-05 | 0.000158 | Q80U40;Q80U40-2          |
| MI / SHAM | -0.61786 | 3.25E-05 | 0.000134 | Q80Y55                   |
| MI / SHAM | -0.61654 | 0.000396 | 0.000697 | Q8BHD7;Q8BHD7-2          |
| MI / SHAM | -0.61516 | 0.000232 | 0.000482 | Q99NF2-3                 |
| MI / SHAM | -0.61482 | 3.1E-06  | 3.04E-05 | Q80WC7;Q80WC7-2          |
| MI / SHAM | -0.61387 | 0.002076 | 0.002204 | Q9JJR9                   |

|           |          |          |          |                                                                     |
|-----------|----------|----------|----------|---------------------------------------------------------------------|
| MI / SHAM | -0.613   | 1.89E-07 | 5.16E-06 | Q4KMM3<br>P15379;P15379-10;P15379-11;P15379-2;P15379-3;P15379-4;P15 |
| MI / SHAM | -0.61216 | 9.83E-05 | 0.000279 | 8;P15379-9                                                          |
| MI / SHAM | -0.61064 | 5.99E-05 | 0.000204 | Q9WUB4                                                              |
| MI / SHAM | -0.60959 | 0.001088 | 0.0014   | Q8BTY8                                                              |
| MI / SHAM | -0.60678 | 9.75E-05 | 0.000277 | Q8BH64                                                              |
| MI / SHAM | -0.60611 | 0.068837 | 0.031385 | Q9WV31                                                              |
| MI / SHAM | -0.6052  | 0.016974 | 0.010346 | P70453;P70453-2                                                     |
| MI / SHAM | -0.60481 | 0.080317 | 0.035496 | Q9R020;Q9R020-2                                                     |
| MI / SHAM | -0.60069 | 0.066166 | 0.030386 | Q924H7;Q924H7-2                                                     |
| MI / SHAM | -0.59865 | 3.88E-07 | 7.57E-06 | Q8BG67;Q8BG67-2                                                     |
| MI / SHAM | -0.59804 | 1.29E-06 | 1.67E-05 | Q68ED2                                                              |
| MI / SHAM | -0.59772 | 0.051949 | 0.024906 | Q8VE80                                                              |
| MI / SHAM | -0.5952  | 0.00024  | 0.000492 | Q9R226                                                              |
| MI / SHAM | -0.59448 | 5.06E-06 | 4.19E-05 | Q9Z1L5                                                              |
| MI / SHAM | -0.59447 | 0.112306 | 0.046858 | P59041                                                              |
| MI / SHAM | -0.5938  | 0.007924 | 0.005824 | Q8K3X4                                                              |
| MI / SHAM | -0.59289 | 0.04734  | 0.023105 | Q8K377                                                              |
| MI / SHAM | -0.59258 | 9.6E-05  | 0.000276 | Q9CYG7                                                              |
| MI / SHAM | -0.59234 | 0.107108 | 0.045041 | Q45VK7;Q45VK7-2                                                     |
| MI / SHAM | -0.59219 | 0.062561 | 0.028979 | Q9Z1S8                                                              |
| MI / SHAM | -0.59    | 1.19E-05 | 7.18E-05 | Q8VHR5                                                              |
| MI / SHAM | -0.58813 | 1.18E-05 | 7.14E-05 | Q8CHG7                                                              |
| MI / SHAM | -0.58701 | 1.51E-05 | 8.39E-05 | Q68FM6                                                              |
| MI / SHAM | -0.58663 | 1.57E-07 | 4.57E-06 | Q99JY9                                                              |
| MI / SHAM | -0.58507 | 1.12E-06 | 1.56E-05 | Q9R257                                                              |
| MI / SHAM | -0.5847  | 5.97E-07 | 1.02E-05 | Q9R0Q6                                                              |
| MI / SHAM | -0.58446 | 0.018808 | 0.011191 | P59114                                                              |
| MI / SHAM | -0.5829  | 4.96E-05 | 0.000179 | P28660                                                              |
| MI / SHAM | -0.58071 | 0.042646 | 0.021221 | O88811                                                              |
| MI / SHAM | 0.58071  | 0.003353 | 0.00309  | Q8CHT1;Q8CHT1-2                                                     |
| MI / SHAM | 0.581065 | 1.55E-06 | 1.92E-05 | O09111                                                              |
| MI / SHAM | 0.581467 | 0.011302 | 0.007562 | Q6GQW0                                                              |
| MI / SHAM | 0.583409 | 0.021922 | 0.01257  | Q6QWF9                                                              |
| MI / SHAM | 0.584186 | 2E-06    | 2.27E-05 | Q99N87                                                              |
| MI / SHAM | 0.584422 | 0.007935 | 0.00583  | P04370-10                                                           |
| MI / SHAM | 0.584745 | 3.79E-05 | 0.000147 | Q62426                                                              |
| MI / SHAM | 0.585457 | 0.000529 | 0.000859 | Q8R1V4                                                              |
| MI / SHAM | 0.588573 | 0.014514 | 0.009184 | Q8BR63                                                              |
| MI / SHAM | 0.589312 | 4.78E-05 | 0.000174 | P60521                                                              |
| MI / SHAM | 0.589901 | 0.044323 | 0.021845 | Q8K3B1                                                              |



|           |          |          |          |                 |
|-----------|----------|----------|----------|-----------------|
| MI / SHAM | 0.590698 | 0.000324 | 0.000609 | Q9D164;Q9D164-2 |
| MI / SHAM | 0.590994 | 0.000603 | 0.00094  | Q9CR86          |
| MI / SHAM | 0.591255 | 0.007574 | 0.005624 | P70689          |
| MI / SHAM | 0.591568 | 0.007559 | 0.005619 | Q05186          |
| MI / SHAM | 0.591697 | 0.099337 | 0.042233 | Q6PGH0          |
| MI / SHAM | 0.592127 | 1.1E-05  | 6.86E-05 | Q8BYY4          |
| MI / SHAM | 0.592907 | 0.008242 | 0.006011 | P24288          |
| MI / SHAM | 0.59487  | 0.004024 | 0.003527 | Q02257          |
| MI / SHAM | 0.594892 | 0.004927 | 0.00407  | O70496          |
| MI / SHAM | 0.596096 | 8.34E-07 | 1.29E-05 | O35136          |
| MI / SHAM | 0.59995  | 0.00093  | 0.001275 | Q6PIE5          |
| MI / SHAM | 0.600463 | 0.000146 | 0.000361 | Q3UUQ7          |
| MI / SHAM | 0.600918 | 0.001041 | 0.001369 | Q8BGR9          |
| MI / SHAM | 0.601292 | 7.44E-05 | 0.000232 | P56565          |
| MI / SHAM | 0.60138  | 0.006708 | 0.005107 | P21661          |
| MI / SHAM | 0.605595 | 0.005567 | 0.004449 | P13634          |
| MI / SHAM | 0.606173 | 0.002313 | 0.002379 | P21300          |
| MI / SHAM | 0.606288 | 1.22E-06 | 1.62E-05 | A6X919          |
| MI / SHAM | 0.60676  | 0.003618 | 0.00326  | P35762          |
| MI / SHAM | 0.610964 | 0.000759 | 0.001112 | Q99LB7          |
| MI / SHAM | 0.611492 | 0.076278 | 0.033977 | E9Q4N7          |
| MI / SHAM | 0.611589 | 0.010008 | 0.006941 | Q9JMB0          |
| MI / SHAM | 0.613204 | 0.051566 | 0.024759 | Q8CF89          |
| MI / SHAM | 0.613654 | 0.00162  | 0.001837 | O08638;O08638-2 |
| MI / SHAM | 0.614134 | 0.047546 | 0.023171 | P63042          |
| MI / SHAM | 0.614234 | 0.001984 | 0.002132 | O35409          |
| MI / SHAM | 0.614981 | 0.001573 | 0.001804 | Q8R366          |
| MI / SHAM | 0.615488 | 2.81E-08 | 1.55E-06 | Q9CZC8          |
| MI / SHAM | 0.615553 | 0.026689 | 0.014708 | O08600          |
| MI / SHAM | 0.616191 | 0.011949 | 0.007878 | Q7TNG5          |
| MI / SHAM | 0.617629 | 0.03052  | 0.016383 | P70444          |
| MI / SHAM | 0.617758 | 0.000981 | 0.001317 | P10605          |
| MI / SHAM | 0.619163 | 0.000431 | 0.000735 | P54227          |
| MI / SHAM | 0.619266 | 0.006413 | 0.004942 | P10922          |
| MI / SHAM | 0.619501 | 0.07103  | 0.032103 | Q9EQF6          |
| MI / SHAM | 0.62131  | 0.001525 | 0.001768 | Q3UNZ8          |
| MI / SHAM | 0.621551 | 0.010823 | 0.007345 | P85094          |
| MI / SHAM | 0.621986 | 0.027541 | 0.015082 | Q921C1          |
| MI / SHAM | 0.622965 | 0.001172 | 0.001475 | Q99JW2          |
| MI / SHAM | 0.624743 | 1.22E-06 | 1.62E-05 | P31324          |
| MI / SHAM | 0.625381 | 0.001157 | 0.001465 | Q8K448          |

|           |          |          |          |                                   |
|-----------|----------|----------|----------|-----------------------------------|
| MI / SHAM | 0.625382 | 0.022284 | 0.012732 | Q9D2P8                            |
| MI / SHAM | 0.625913 | 0.007347 | 0.005492 | O88703                            |
| MI / SHAM | 0.626226 | 0.035662 | 0.018455 | Q924S8                            |
| MI / SHAM | 0.627934 | 0.016864 | 0.010298 | Q6PDG8;Q6PDG8-2                   |
| MI / SHAM | 0.628009 | 0.00098  | 0.001316 | Q9WUM5                            |
| MI / SHAM | 0.628264 | 0.002374 | 0.002423 | Q9CZP7;Q9CZP7-2;Q9CZP7-3;Q9CZP7-4 |
| MI / SHAM | 0.63024  | 1.93E-05 | 9.82E-05 | Q9WU28                            |
| MI / SHAM | 0.630466 | 0.094859 | 0.040603 | Q8R2U6                            |
| MI / SHAM | 0.631851 | 0.003175 | 0.002962 | Q9CQZ1                            |
| MI / SHAM | 0.635474 | 0.000744 | 0.001101 | Q9WV92-3                          |
| MI / SHAM | 0.63644  | 0.00094  | 0.001284 | Q3V0G7;Q3V0G7-2                   |
| MI / SHAM | 0.637993 | 0.007081 | 0.005342 | Q8BJS4;Q8BJS4-2;Q8BJS4-3          |
| MI / SHAM | 0.64055  | 4.55E-06 | 3.93E-05 | O08842                            |
| MI / SHAM | 0.642214 | 0.038489 | 0.019502 | Q99M31;Q99M31-2                   |
| MI / SHAM | 0.644028 | 0.012579 | 0.00822  | P40240                            |
| MI / SHAM | 0.644059 | 0.071325 | 0.03221  | Q8JZX9                            |
| MI / SHAM | 0.64432  | 0.002298 | 0.002372 | Q8BH86                            |
| MI / SHAM | 0.64456  | 0.009355 | 0.006607 | P26049                            |
| MI / SHAM | 0.647132 | 0.010452 | 0.00717  | O88952                            |
| MI / SHAM | 0.648401 | 0.00071  | 0.001062 | P54797                            |
| MI / SHAM | 0.650259 | 0.017433 | 0.010529 | Q921Q3;Q921Q3-2                   |
| MI / SHAM | 0.652175 | 0.000779 | 0.001124 | Q80TN5;Q80TN5-2                   |
| MI / SHAM | 0.655457 | 2.39E-05 | 0.000112 | Q8K183                            |
| MI / SHAM | 0.656372 | 0.108697 | 0.045593 | Q9JIK5                            |
| MI / SHAM | 0.657119 | 0.012148 | 0.007983 | P55012                            |
| MI / SHAM | 0.657174 | 0.00029  | 0.000561 | Q8BGP6                            |
| MI / SHAM | 0.658445 | 0.000524 | 0.000852 | Q91WL8                            |
| MI / SHAM | 0.662021 | 0.002802 | 0.002715 | Q9QY42;Q9QY42-2;Q9QY42-3          |
| MI / SHAM | 0.663292 | 0.009675 | 0.006775 | Q3TYD4;Q3TYD4-2                   |
| MI / SHAM | 0.66348  | 0.008783 | 0.006309 | Q9R087                            |
| MI / SHAM | 0.663689 | 0.000163 | 0.000392 | P11404                            |
| MI / SHAM | 0.665455 | 0.005933 | 0.004677 | Q80VQ0                            |
| MI / SHAM | 0.665904 | 7.95E-06 | 5.52E-05 | Q9ERD7                            |
| MI / SHAM | 0.665915 | 3.9E-06  | 3.59E-05 | P51880                            |
| MI / SHAM | 0.665984 | 2.93E-05 | 0.000129 | Q9D1L9                            |
| MI / SHAM | 0.666583 | 0.000301 | 0.000572 | Q8QZV4                            |
| MI / SHAM | 0.66775  | 0.017299 | 0.010471 | P40237                            |
| MI / SHAM | 0.668819 | 9.57E-07 | 1.38E-05 | Q91YS8                            |
| MI / SHAM | 0.669298 | 1.01E-05 | 6.46E-05 | P16125                            |
| MI / SHAM | 0.669669 | 0.077816 | 0.034566 | O35566                            |
| MI / SHAM | 0.670627 | 2.77E-05 | 0.000123 | P52503                            |

|           |          |          |          |                                                              |
|-----------|----------|----------|----------|--------------------------------------------------------------|
| MI / SHAM | 0.671435 | 0.001339 | 0.001611 | P48320                                                       |
| MI / SHAM | 0.674281 | 0.003711 | 0.00332  | Q64689                                                       |
| MI / SHAM | 0.674654 | 0.000128 | 0.000333 | Q8CCK0                                                       |
| MI / SHAM | 0.675146 | 0.05844  | 0.027454 | Q8BG89;Q8BG89-2                                              |
| MI / SHAM | 0.675208 | 2.88E-07 | 6.36E-06 | Q6PDN3;Q6PDN3-3                                              |
| MI / SHAM | 0.676058 | 1.95E-05 | 9.87E-05 | P70452                                                       |
| MI / SHAM | 0.677108 | 0.000129 | 0.000333 | Q9WUT3                                                       |
| MI / SHAM | 0.677307 | 0.000298 | 0.000568 | Q9JKN6                                                       |
| MI / SHAM | 0.677806 | 0.00071  | 0.001062 | Q8VEB6                                                       |
| MI / SHAM | 0.67829  | 0.04419  | 0.021799 | Q3UFY8                                                       |
| MI / SHAM | 0.680478 | 0.000168 | 0.000399 | Q9EQP2                                                       |
| MI / SHAM | 0.680628 | 0.001476 | 0.001729 | Q61595                                                       |
| MI / SHAM | 0.680976 | 8.32E-05 | 0.000251 | Q62219;Q62219-2;Q62219-3;Q62219-4;Q62219-5;Q62219-7;Q62219-8 |
| MI / SHAM | 0.683706 | 0.013182 | 0.008497 | Q9QYB1                                                       |
| MI / SHAM | 0.684428 | 0.00309  | 0.002904 | Q60673                                                       |
| MI / SHAM | 0.685199 | 0.000187 | 0.000427 | Q99JR5                                                       |
| MI / SHAM | 0.68623  | 0.01261  | 0.008228 | B1AXP6;B1AXP6-2;B1AXP6-3;B1AXP6-4                            |
| MI / SHAM | 0.687482 | 0.002588 | 0.002563 | O35218                                                       |
| MI / SHAM | 0.68855  | 0.001556 | 0.001789 | Q61207                                                       |
| MI / SHAM | 0.689738 | 0.000158 | 0.000384 | P21836                                                       |
| MI / SHAM | 0.691971 | 0.002907 | 0.00279  | Q8K2T1                                                       |
| MI / SHAM | 0.692351 | 0.113251 | 0.047181 | Q8CFI0;Q8CFI0-3                                              |
| MI / SHAM | 0.692608 | 0.000917 | 0.001259 | Q8BGD8                                                       |
| MI / SHAM | 0.693021 | 0.002515 | 0.00251  | O55074;Q7TN79                                                |
| MI / SHAM | 0.693315 | 0.001    | 0.00133  | Q9CPW0                                                       |
| MI / SHAM | 0.696863 | 0.013088 | 0.00845  | P16330                                                       |
| MI / SHAM | 0.703549 | 1.38E-06 | 1.74E-05 | P32211                                                       |
| MI / SHAM | 0.703764 | 0.079782 | 0.035298 | Q99PI8                                                       |
| MI / SHAM | 0.703841 | 0.028761 | 0.015636 | O35604                                                       |
| MI / SHAM | 0.704855 | 0.073092 | 0.032891 | Q91X56                                                       |
| MI / SHAM | 0.706897 | 0.000596 | 0.000935 | Q9Z2S7;Q9Z2S7-3;Q9Z2S7-4                                     |
| MI / SHAM | 0.707577 | 0.048948 | 0.023743 | Q5FWI3                                                       |
| MI / SHAM | 0.709098 | 0.000747 | 0.001104 | Q6ZWM4                                                       |
| MI / SHAM | 0.71272  | 0.001989 | 0.002135 | Q8BXA0;Q8BXA0-2                                              |
| MI / SHAM | 0.714841 | 0.013005 | 0.008416 | Q8C170                                                       |
| MI / SHAM | 0.717419 | 0.000136 | 0.000347 | Q7TNF0                                                       |
| MI / SHAM | 0.718425 | 0.0212   | 0.012241 | Q80YN3                                                       |
| MI / SHAM | 0.721097 | 0.000779 | 0.001124 | Q640M6                                                       |
| MI / SHAM | 0.721454 | 0.054851 | 0.026101 | Q9CQ79                                                       |
| MI / SHAM | 0.721958 | 0.009464 | 0.00666  | O09117-2                                                     |
| MI / SHAM | 0.722625 | 0.020638 | 0.012    | O70305                                                       |

|           |          |          |          |                          |
|-----------|----------|----------|----------|--------------------------|
| MI / SHAM | 0.722912 | 0.004168 | 0.003614 | O35393                   |
| MI / SHAM | 0.723112 | 0.001622 | 0.001837 | Q00612                   |
| MI / SHAM | 0.724919 | 0.008283 | 0.006032 | Q3V0K9                   |
| MI / SHAM | 0.725791 | 0.000599 | 0.000938 | Q6PE15;Q6PE15-2          |
| MI / SHAM | 0.726863 | 0.0004   | 0.000698 | Q3UUF8                   |
| MI / SHAM | 0.726978 | 2.46E-05 | 0.000114 | E9PV24;E9PV24-2          |
| MI / SHAM | 0.732002 | 0.001193 | 0.001496 | P97450                   |
| MI / SHAM | 0.733249 | 0.001767 | 0.001953 | Q8C6B2;Q8C6B2-2          |
| MI / SHAM | 0.733382 | 0.028046 | 0.015293 | P12265                   |
| MI / SHAM | 0.73425  | 0.010484 | 0.007174 | Q61282                   |
| MI / SHAM | 0.736137 | 0.000136 | 0.000347 | Q9DCC8                   |
| MI / SHAM | 0.736345 | 0.004082 | 0.003554 | Q05BC3;Q05BC3-2          |
| MI / SHAM | 0.737046 | 0.090988 | 0.039177 | O35680                   |
| MI / SHAM | 0.737393 | 0.000171 | 0.000404 | Q91V64                   |
| MI / SHAM | 0.738502 | 0.000807 | 0.001147 | Q8VCI5                   |
| MI / SHAM | 0.740716 | 2.01E-07 | 5.21E-06 | Q8K0E8                   |
| MI / SHAM | 0.741127 | 0.000159 | 0.000384 | P98200                   |
| MI / SHAM | 0.742843 | 0.00255  | 0.00254  | A2APX8;A2APX8-2;A2APX8-3 |
| MI / SHAM | 0.743143 | 4.9E-06  | 4.1E-05  | Q9R069                   |
| MI / SHAM | 0.744719 | 0.002013 | 0.002149 | Q9R1V7;Q9R1V7-2          |
| MI / SHAM | 0.746546 | 0.009961 | 0.006919 | Q9CX80                   |
| MI / SHAM | 0.747202 | 0.015736 | 0.009789 | Q62433                   |
| MI / SHAM | 0.747244 | 0.080621 | 0.035602 | Q6V4S5                   |
| MI / SHAM | 0.749064 | 0.00026  | 0.000517 | Q8K4Z0-2                 |
| MI / SHAM | 0.750323 | 0.004805 | 0.004009 | Q65CL1                   |
| MI / SHAM | 0.752156 | 0.004782 | 0.003998 | Q91X51                   |
| MI / SHAM | 0.752968 | 0.001215 | 0.001512 | Q8R127                   |
| MI / SHAM | 0.755385 | 3.38E-05 | 0.000137 | P70392                   |
| MI / SHAM | 0.757983 | 0.000235 | 0.000485 | Q8K3R3;Q8K3R3-2          |
| MI / SHAM | 0.762485 | 3.82E-05 | 0.000147 | O35633;O35633-2          |
| MI / SHAM | 0.762903 | 0.004647 | 0.003922 | Q8BFZ2;Q8BFZ2-2          |
| MI / SHAM | 0.764478 | 3.29E-07 | 6.98E-06 | Q8R0A5                   |
| MI / SHAM | 0.76853  | 0.004008 | 0.003519 | P46656                   |
| MI / SHAM | 0.769621 | 0.000299 | 0.00057  | P50153                   |
| MI / SHAM | 0.774401 | 0.00786  | 0.005788 | Q6A152                   |
| MI / SHAM | 0.77454  | 0.000137 | 0.000348 | Q81110                   |
| MI / SHAM | 0.778209 | 0.016915 | 0.010317 | Q61646                   |
| MI / SHAM | 0.779967 | 0.000203 | 0.000446 | P37804                   |
| MI / SHAM | 0.780554 | 9.61E-05 | 0.000276 | Q9DB32                   |
| MI / SHAM | 0.780668 | 0.004485 | 0.003801 | POC7M9                   |
| MI / SHAM | 0.783372 | 0.026874 | 0.014805 | Q62442;Q62442-2          |

|           |          |          |          |                          |
|-----------|----------|----------|----------|--------------------------|
| MI / SHAM | 0.784006 | 0.002597 | 0.002568 | O88343                   |
| MI / SHAM | 0.784877 | 0.000112 | 0.000305 | Q9CPZ8                   |
| MI / SHAM | 0.785781 | 1.41E-05 | 8.07E-05 | Q9CR21                   |
| MI / SHAM | 0.786811 | 0.061662 | 0.028643 | Q9D6I9                   |
| MI / SHAM | 0.787923 | 0.021248 | 0.012264 | O55242;O55242-2          |
| MI / SHAM | 0.789756 | 0.002233 | 0.002322 | P97370                   |
| MI / SHAM | 0.790024 | 0.000743 | 0.0011   | P60202                   |
| MI / SHAM | 0.790368 | 0.011301 | 0.007562 | Q5SYD0                   |
| MI / SHAM | 0.793759 | 0.001397 | 0.001663 | Q80XP9;Q80XP9-2          |
| MI / SHAM | 0.795333 | 0.002802 | 0.002715 | P61793;P61793-2          |
| MI / SHAM | 0.797026 | 0.013015 | 0.008419 | Q61469-2                 |
| MI / SHAM | 0.798951 | 2.93E-05 | 0.000129 | P07758;Q00896            |
| MI / SHAM | 0.801476 | 0.011218 | 0.007542 | Q8VDQ8                   |
| MI / SHAM | 0.802926 | 0.001196 | 0.001497 | Q8CCF0;Q8CCF0-2          |
| MI / SHAM | 0.80698  | 0.000539 | 0.000867 | Q9CXT8                   |
| MI / SHAM | 0.807523 | 0.002522 | 0.002514 | Q8C522                   |
| MI / SHAM | 0.80964  | 0.000359 | 0.000653 | P97467                   |
| MI / SHAM | 0.815238 | 0.000998 | 0.001329 | Q922F4                   |
| MI / SHAM | 0.815413 | 2.36E-05 | 0.000112 | Q61923                   |
| MI / SHAM | 0.815473 | 0.000107 | 0.000296 | Q00623                   |
| MI / SHAM | 0.81903  | 0.012851 | 0.008336 | Q8BGN3                   |
| MI / SHAM | 0.820014 | 0.000783 | 0.001124 | Q7TPB0                   |
| MI / SHAM | 0.822056 | 0.041657 | 0.020824 | Q9CR30                   |
| MI / SHAM | 0.823163 | 0.044086 | 0.021754 | P28481-4                 |
| MI / SHAM | 0.826625 | 0.002965 | 0.002835 | Q3U7R1                   |
| MI / SHAM | 0.829374 | 0.010315 | 0.007097 | Q80XD1;Q80XD1-2;Q80XD1-3 |
| MI / SHAM | 0.833407 | 4.66E-07 | 8.57E-06 | O54879                   |
| MI / SHAM | 0.836881 | 0.004821 | 0.004016 | Q60803                   |
| MI / SHAM | 0.838285 | 4.76E-11 | 3.94E-08 | Q04899                   |
| MI / SHAM | 0.839526 | 0.00035  | 0.000643 | Q9Z0L0                   |
| MI / SHAM | 0.840594 | 8.88E-05 | 0.000264 | Q6P069;Q6P069-2          |
| MI / SHAM | 0.840838 | 7.24E-06 | 5.15E-05 | P29391                   |
| MI / SHAM | 0.841913 | 0.001315 | 0.001592 | P17095                   |
| MI / SHAM | 0.84219  | 0.07996  | 0.035367 | P63054                   |
| MI / SHAM | 0.844441 | 4.52E-05 | 0.000167 | P06837                   |
| MI / SHAM | 0.846892 | 0.000297 | 0.000568 | P02469                   |
| MI / SHAM | 0.84957  | 0.003604 | 0.003252 | P28650                   |
| MI / SHAM | 0.850841 | 0.000468 | 0.000783 | Q8C996                   |
| MI / SHAM | 0.85154  | 0.006168 | 0.004795 | Q61330                   |
| MI / SHAM | 0.851581 | 0.00015  | 0.000369 | Q5NCIO;Q5NCIO-2          |
| MI / SHAM | 0.851929 | 0.00076  | 0.001113 | O55091                   |

|           |          |          |          |                          |
|-----------|----------|----------|----------|--------------------------|
| MI / SHAM | 0.853161 | 0.036497 | 0.018767 | Q9D486;Q9D486-2          |
| MI / SHAM | 0.853257 | 0.018232 | 0.010912 | P49025;P49025-3          |
| MI / SHAM | 0.854968 | 0.000851 | 0.001195 | P53668                   |
| MI / SHAM | 0.855305 | 0.009666 | 0.006774 | Q80Y50;Q80Y50-2;Q80Y50-4 |
| MI / SHAM | 0.856347 | 0.017101 | 0.010405 | Q80WM4                   |
| MI / SHAM | 0.85725  | 1.29E-05 | 7.6E-05  | Q9JIM1;Q9JIM1-2          |
| MI / SHAM | 0.85832  | 0.011481 | 0.007648 | Q922J6                   |
| MI / SHAM | 0.858576 | 0.001062 | 0.001386 | Q99L13                   |
| MI / SHAM | 0.859815 | 0.000267 | 0.000527 | Q8BUE4;Q8BUE4-2          |
| MI / SHAM | 0.860852 | 0.010948 | 0.007406 | Q08091;Q08091-2          |
| MI / SHAM | 0.86248  | 0.058864 | 0.027619 | Q8CIZ8                   |
| MI / SHAM | 0.863931 | 0.002808 | 0.002716 | Q8BUM6                   |
| MI / SHAM | 0.866612 | 0.118994 | 0.049153 | Q9DC04;Q9DC04-1;Q9DC04-4 |
| MI / SHAM | 0.866697 | 0.000198 | 0.000441 | Q9CWD3;Q9CWD3-2          |
| MI / SHAM | 0.867503 | 0.033646 | 0.017694 | Q7TPM1                   |
| MI / SHAM | 0.869777 | 0.000533 | 0.000863 | Q9R1B9                   |
| MI / SHAM | 0.870027 | 0.000686 | 0.001037 | Q9D7J4                   |
| MI / SHAM | 0.876279 | 0.000769 | 0.001119 | Q9QXC1                   |
| MI / SHAM | 0.877114 | 0.031269 | 0.016688 | Q9Z1M0                   |
| MI / SHAM | 0.879342 | 0.001593 | 0.001818 | O35668                   |
| MI / SHAM | 0.885593 | 0.002942 | 0.002818 | Q9JHR9;Q9JHR9-2          |
| MI / SHAM | 0.887264 | 0.012002 | 0.007897 | Q8R3P0                   |
| MI / SHAM | 0.889084 | 0.000791 | 0.001133 | Q8CFA2                   |
| MI / SHAM | 0.889296 | 0.000422 | 0.000726 | P22599                   |
| MI / SHAM | 0.889911 | 2.38E-05 | 0.000112 | D3YVE8                   |
| MI / SHAM | 0.890789 | 0.005851 | 0.004629 | Q9QXX4                   |
| MI / SHAM | 0.893409 | 0.002449 | 0.002473 | Q78TU8                   |
| MI / SHAM | 0.89587  | 0.002998 | 0.002856 | Q8VHP7                   |
| MI / SHAM | 0.896519 | 0.027311 | 0.014989 | Q8R2Q4;Q8R2Q4-2;Q8R2Q4-3 |
| MI / SHAM | 0.898056 | 0.067668 | 0.030921 | Q3V3N7                   |
| MI / SHAM | 0.899178 | 1.52E-05 | 8.42E-05 | Q91YQ3                   |
| MI / SHAM | 0.900684 | 0.008785 | 0.006309 | Q91VC7                   |
| MI / SHAM | 0.901772 | 0.011022 | 0.007435 | Q61885                   |
| MI / SHAM | 0.905781 | 0.009931 | 0.00691  | Q8BZF2                   |
| MI / SHAM | 0.906791 | 0.009635 | 0.00676  | P46660                   |
| MI / SHAM | 0.909507 | 0.012462 | 0.008157 | P61953                   |
| MI / SHAM | 0.915141 | 0.000799 | 0.001138 | Q8K0S5                   |
| MI / SHAM | 0.919575 | 0.004913 | 0.004064 | Q8BQU6                   |
| MI / SHAM | 0.919684 | 0.000249 | 0.000504 | Q8BPU7                   |
| MI / SHAM | 0.919863 | 0.00015  | 0.000369 | Q8CCX5                   |
| MI / SHAM | 0.928306 | 0.01056  | 0.007205 | Q91WF7                   |

|           |          |          |          |                          |
|-----------|----------|----------|----------|--------------------------|
| MI / SHAM | 0.928499 | 0.001781 | 0.00196  | P61148                   |
| MI / SHAM | 0.930382 | 0.000993 | 0.001326 | P14231                   |
| MI / SHAM | 0.932138 | 0.00226  | 0.002345 | P63141                   |
| MI / SHAM | 0.937757 | 0.003938 | 0.003466 | P35505                   |
| MI / SHAM | 0.93822  | 0.017823 | 0.01072  | A2A6T1                   |
| MI / SHAM | 0.939343 | 0.000903 | 0.001248 | P62715                   |
| MI / SHAM | 0.940098 | 2.29E-05 | 0.000109 | Q8CD19                   |
| MI / SHAM | 0.941052 | 0.001166 | 0.001471 | Q9RON8;Q9RON8-2          |
| MI / SHAM | 0.944441 | 0.000233 | 0.000483 | Q80U57                   |
| MI / SHAM | 0.946706 | 3.77E-05 | 0.000146 | Q8BZ98                   |
| MI / SHAM | 0.948112 | 0.07629  | 0.033977 | Q8C033                   |
| MI / SHAM | 0.950522 | 0.010743 | 0.007297 | Q3UL36                   |
| MI / SHAM | 0.951171 | 0.000232 | 0.000482 | O35488                   |
| MI / SHAM | 0.953881 | 0.007758 | 0.005723 | P97382                   |
| MI / SHAM | 0.958257 | 1.34E-05 | 7.78E-05 | P28665                   |
| MI / SHAM | 0.959636 | 0.000783 | 0.001124 | Q8BRU6                   |
| MI / SHAM | 0.961814 | 3.82E-07 | 7.53E-06 | P42232                   |
| MI / SHAM | 0.971861 | 0.008339 | 0.006059 | Q8K298                   |
| MI / SHAM | 0.973966 | 0.039294 | 0.019838 | Q91YT8                   |
| MI / SHAM | 0.975473 | 0.051703 | 0.02481  | Q8BZQ7                   |
| MI / SHAM | 0.978964 | 0.005128 | 0.004182 | Q8C4Y3-3                 |
| MI / SHAM | 0.979128 | 0.056297 | 0.026621 | Q8C3J5                   |
| MI / SHAM | 0.982851 | 0.006187 | 0.004805 | Q9D154                   |
| MI / SHAM | 0.983518 | 0.006059 | 0.004746 | P15388-3                 |
| MI / SHAM | 0.987558 | 0.003556 | 0.003225 | Q9CPU2                   |
| MI / SHAM | 0.989247 | 0.017965 | 0.010783 | Q8BKY8                   |
| MI / SHAM | 0.992541 | 0.025169 | 0.014019 | Q4VBD2                   |
| MI / SHAM | 0.993649 | 0.107847 | 0.0453   | P41778;P41778-2          |
| MI / SHAM | 1.000249 | 0.046929 | 0.022938 | Q9JKK0                   |
| MI / SHAM | 1.002751 | 0.003185 | 0.002969 | Q9D387                   |
| MI / SHAM | 1.012868 | 0.001643 | 0.00185  | Q9WU63                   |
| MI / SHAM | 1.015054 | 0.001822 | 0.001996 | P08553                   |
| MI / SHAM | 1.016805 | 0.020368 | 0.011885 | Q3TVA9;Q3TVA9-2          |
| MI / SHAM | 1.016986 | 0.005324 | 0.004297 | Q8BL06                   |
| MI / SHAM | 1.018453 | 0.000116 | 0.000313 | Q6ZQB6;Q6ZQB6-2;Q6ZQB6-3 |
| MI / SHAM | 1.019786 | 0.094903 | 0.040609 | B9EJI9                   |
| MI / SHAM | 1.021274 | 0.001771 | 0.001955 | Q9WV95                   |
| MI / SHAM | 1.025369 | 0.00106  | 0.001385 | Q9JHG2                   |
| MI / SHAM | 1.028398 | 8.79E-06 | 6.02E-05 | P56382                   |
| MI / SHAM | 1.029369 | 0.001549 | 0.001784 | Q9WTQ5                   |
| MI / SHAM | 1.03906  | 0.050899 | 0.024488 | Q9Z126                   |

|           |          |          |          |                                   |
|-----------|----------|----------|----------|-----------------------------------|
| MI / SHAM | 1.040033 | 0.004853 | 0.004032 | Q8K406                            |
| MI / SHAM | 1.042354 | 0.036503 | 0.018767 | Q80TQ5;Q80TQ5-2;Q80TQ5-3          |
| MI / SHAM | 1.049512 | 0.000182 | 0.000418 | P58069                            |
| MI / SHAM | 1.049529 | 0.02101  | 0.01216  | P61458                            |
| MI / SHAM | 1.051644 | 0.009999 | 0.006937 | O88492;O88492-2                   |
| MI / SHAM | 1.056496 | 0.001254 | 0.001549 | Q6P5H6;Q6P5H6-2;Q6P5H6-3;Q6P5H6-4 |
| MI / SHAM | 1.057686 | 0.000958 | 0.001295 | P19536                            |
| MI / SHAM | 1.058245 | 0.003188 | 0.002969 | Q6A026                            |
| MI / SHAM | 1.063636 | 0.000355 | 0.000647 | P12787                            |
| MI / SHAM | 1.066351 | 0.066131 | 0.030382 | Q9R0X5;Q9R0X5-2                   |
| MI / SHAM | 1.070704 | 0.007111 | 0.005358 | P20917                            |
| MI / SHAM | 1.077066 | 2.66E-05 | 0.00012  | Q8JZW4                            |
| MI / SHAM | 1.078623 | 0.003652 | 0.003281 | Q9DB72                            |
| MI / SHAM | 1.085822 | 0.043717 | 0.021617 | B1AWL2                            |
| MI / SHAM | 1.086724 | 0.029353 | 0.015901 | Q6P8J2                            |
| MI / SHAM | 1.091447 | 0.039253 | 0.019824 | Q8BGV8                            |
| MI / SHAM | 1.091513 | 0.000988 | 0.00132  | Q9JM63                            |
| MI / SHAM | 1.09482  | 0.004753 | 0.003982 | Q9JL62                            |
| MI / SHAM | 1.096294 | 1.21E-07 | 4.08E-06 | Q8VCM7                            |
| MI / SHAM | 1.102833 | 0.000399 | 0.000698 | P61922                            |
| MI / SHAM | 1.10414  | 0.001328 | 0.001601 | Q64436                            |
| MI / SHAM | 1.104246 | 0.000182 | 0.000418 | Q9CRB6                            |
| MI / SHAM | 1.108407 | 0.034865 | 0.018161 | Q91V24                            |
| MI / SHAM | 1.111257 | 0.007148 | 0.005376 | Q9DC11                            |
| MI / SHAM | 1.111486 | 0.117549 | 0.048646 | Q9D8Z6                            |
| MI / SHAM | 1.113284 | 0.016633 | 0.010201 | P56671                            |
| MI / SHAM | 1.120916 | 1.88E-05 | 9.7E-05  | Q9JLC4;Q9JLC4-2;Q9JLC4-3;Q9JLC4-4 |
| MI / SHAM | 1.125841 | 0.000777 | 0.001124 | Q9JJF0                            |
| MI / SHAM | 1.137629 | 0.002618 | 0.002584 | Q7TN98                            |
| MI / SHAM | 1.152759 | 0.080935 | 0.035712 | Q7TPV2;Q7TPV2-2                   |
| MI / SHAM | 1.153585 | 0.000842 | 0.001187 | Q8HW98                            |
| MI / SHAM | 1.15423  | 0.003538 | 0.003214 | P50114                            |
| MI / SHAM | 1.159757 | 0.000684 | 0.001034 | P59823                            |
| MI / SHAM | 1.163498 | 0.002092 | 0.002212 | Q9Z0Z4;Q9Z0Z4-2                   |
| MI / SHAM | 1.170867 | 0.005134 | 0.004184 | Q8R4V2                            |
| MI / SHAM | 1.175868 | 0.004249 | 0.003661 | P22933                            |
| MI / SHAM | 1.177585 | 0.004738 | 0.003978 | Q9WV92-7                          |
| MI / SHAM | 1.179991 | 0.001046 | 0.001375 | Q9JJ59                            |
| MI / SHAM | 1.182965 | 0.003573 | 0.003237 | Q9WVT6                            |
| MI / SHAM | 1.188374 | 0.016344 | 0.010073 | Q9R171                            |
| MI / SHAM | 1.189074 | 0.002133 | 0.002244 | Q02357-6                          |



|           |          |          |          |                                                     |
|-----------|----------|----------|----------|-----------------------------------------------------|
| MI / SHAM | 1.189861 | 0.000271 | 0.00053  | P51125;P51125-2;P51125-3;P51125-6                   |
| MI / SHAM | 1.198626 | 0.001776 | 0.001958 | Q99L20                                              |
| MI / SHAM | 1.201795 | 0.003362 | 0.003094 | P08551                                              |
| MI / SHAM | 1.204412 | 0.006581 | 0.005041 | Q8BXQ2                                              |
| MI / SHAM | 1.211598 | 0.002939 | 0.002818 | P51910                                              |
| MI / SHAM | 1.214758 | 0.001589 | 0.001814 | P24549                                              |
| MI / SHAM | 1.218344 | 0.049552 | 0.023973 | Q8K2P7                                              |
| MI / SHAM | 1.219911 | 0.000192 | 0.000433 | Q9DCB4;Q9DCB4-3;Q9DCB4-4;Q9DCB4-5;Q9DCB4-9          |
| MI / SHAM | 1.220996 | 0.049345 | 0.023893 | Q8C0Z1                                              |
| MI / SHAM | 1.231527 | 6.72E-06 | 4.86E-05 | P0DP26;P0DP27;P0DP28                                |
| MI / SHAM | 1.23356  | 2.97E-05 | 0.000129 | P07759                                              |
| MI / SHAM | 1.254598 | 0.006004 | 0.004713 | P84096                                              |
| MI / SHAM | 1.257812 | 0.000302 | 0.000572 | Q61205                                              |
| MI / SHAM | 1.264936 | 4.93E-06 | 4.1E-05  | P54830                                              |
| MI / SHAM | 1.286154 | 0.000358 | 0.000652 | Q6PHZ2-5                                            |
| MI / SHAM | 1.294436 | 0.042206 | 0.021033 | Q8BUB4                                              |
| MI / SHAM | 1.302263 | 3.48E-06 | 3.26E-05 | Q91X72                                              |
| MI / SHAM | 1.304691 | 0.006674 | 0.005088 | Q9EPQ8;Q9EPQ8-2                                     |
| MI / SHAM | 1.308804 | 3.24E-05 | 0.000134 | Q62465                                              |
| MI / SHAM | 1.309352 | 1.6E-05  | 8.69E-05 | A6X935                                              |
| MI / SHAM | 1.31411  | 0.012169 | 0.00799  | Q6P9J5                                              |
| MI / SHAM | 1.319106 | 0.046177 | 0.022644 | Q8BLK9;Q8BLK9-2;Q8BLK9-3                            |
| MI / SHAM | 1.3235   | 0.076841 | 0.034179 | P70365;P70365-2;P70365-3;P70365-4                   |
| MI / SHAM | 1.324431 | 0.000112 | 0.000307 | Q69ZS6                                              |
| MI / SHAM | 1.337488 | 3.96E-06 | 3.6E-05  | Q8CJF9                                              |
| MI / SHAM | 1.337782 | 0.067078 | 0.030745 | Q8K2I4                                              |
| MI / SHAM | 1.35197  | 0.03179  | 0.0169   | Q8VCE1                                              |
| MI / SHAM | 1.356877 | 0.02314  | 0.013123 | Q6P9Z1                                              |
| MI / SHAM | 1.383182 | 0.000433 | 0.000737 | Q6PHS9;Q6PHS9-2;Q6PHS9-3;Q6PHS9-4;Q6PHS9-5;Q6PHS9-6 |
| MI / SHAM | 1.385926 | 0.004709 | 0.003963 | P97799                                              |
| MI / SHAM | 1.388416 | 0.076369 | 0.033988 | Q8BIL5                                              |
| MI / SHAM | 1.395513 | 2.11E-05 | 0.000104 | Q01065                                              |
| MI / SHAM | 1.426229 | 0.000558 | 0.000891 | Q8BWU8                                              |
| MI / SHAM | 1.466055 | 0.000208 | 0.000452 | Q03517                                              |
| MI / SHAM | 1.474344 | 0.000123 | 0.000324 | Q61503                                              |
| MI / SHAM | 1.484809 | 0.000446 | 0.000756 | O88533                                              |
| MI / SHAM | 1.502039 | 0.00163  | 0.00184  | O08599-2                                            |
| MI / SHAM | 1.505753 | 0.102153 | 0.043232 | Q8C650;Q8C650-2                                     |
| MI / SHAM | 1.515357 | 0.000103 | 0.000289 | O54834;O54834-2;O54834-3;O54834-4                   |
| MI / SHAM | 1.532813 | 0.000237 | 0.000487 | P84309                                              |
| MI / SHAM | 1.537253 | 0.002829 | 0.002732 | Q9JLM9                                              |

|           |          |          |          |                          |
|-----------|----------|----------|----------|--------------------------|
| MI / SHAM | 1.545504 | 0.001025 | 0.001355 | Q8K3E5                   |
| MI / SHAM | 1.597652 | 0.001053 | 0.001378 | P28571-1                 |
| MI / SHAM | 1.59964  | 9.09E-05 | 0.000266 | A2ARSO                   |
| MI / SHAM | 1.614875 | 0.027678 | 0.015147 | Q6VWW5;Q6VWW5-2          |
| MI / SHAM | 1.622276 | 0.002092 | 0.002212 | Q9ESM3                   |
| MI / SHAM | 1.642531 | 0.002018 | 0.002151 | P54116                   |
| MI / SHAM | 1.644791 | 1.84E-05 | 9.65E-05 | Q61327                   |
| MI / SHAM | 1.68139  | 0.020268 | 0.011848 | O35143                   |
| MI / SHAM | 1.684847 | 0.000421 | 0.000726 | Q7TQA1;Q7TQA1-5          |
| MI / SHAM | 1.700488 | 0.001729 | 0.001923 | P32848                   |
| MI / SHAM | 1.728134 | 0.002005 | 0.002144 | P28230                   |
| MI / SHAM | 1.734645 | 0.003096 | 0.002908 | P19246                   |
| MI / SHAM | 1.735386 | 5.98E-15 | 9.91E-12 | Q6W8Q3                   |
| MI / SHAM | 1.781581 | 0.000194 | 0.000436 | Q8CGK7                   |
| MI / SHAM | 1.794242 | 0.000551 | 0.000883 | P31650                   |
| MI / SHAM | 1.811821 | 0.003315 | 0.003059 | Q0PMG2                   |
| MI / SHAM | 1.823681 | 9E-05    | 0.000265 | Q9QXV0                   |
| MI / SHAM | 1.823931 | 0.000592 | 0.000933 | P56389                   |
| MI / SHAM | 1.824921 | 0.035114 | 0.018257 | Q8R3L5-2                 |
| MI / SHAM | 1.838173 | 0.003242 | 0.003005 | Q63959                   |
| MI / SHAM | 1.853591 | 0.004794 | 0.004004 | Q8R3Q0                   |
| MI / SHAM | 1.854976 | 0.001069 | 0.001389 | Q9Z0F7                   |
| MI / SHAM | 1.866554 | 0.00015  | 0.000369 | Q61704                   |
| MI / SHAM | 1.868958 | 4.86E-08 | 2.01E-06 | Q50H33                   |
| MI / SHAM | 1.919936 | 0.047082 | 0.022999 | Q6P5G6                   |
| MI / SHAM | 1.943197 | 0.003543 | 0.003216 | P46097                   |
| MI / SHAM | 2.011333 | 3.7E-05  | 0.000145 | Q80TB8                   |
| MI / SHAM | 2.014951 | 1.48E-05 | 8.34E-05 | Q08331                   |
| MI / SHAM | 2.027975 | 0.000164 | 0.000393 | Q9Z123                   |
| MI / SHAM | 2.037068 | 6.03E-05 | 0.000205 | Q8CA95;Q8CA95-2;Q8CA95-3 |
| MI / SHAM | 2.03839  | 1.55E-05 | 8.5E-05  | Q8BFZ3                   |
| MI / SHAM | 2.081458 | 4.9E-06  | 4.1E-05  | Q9QUG9                   |
| MI / SHAM | 2.1224   | 0.007918 | 0.005823 | Q761V0;Q761V0-2          |
| MI / SHAM | 2.288958 | 2.69E-05 | 0.00012  | Q60829                   |
| MI / SHAM | 2.349128 | 0.062422 | 0.028931 | O08644                   |
| MI / SHAM | 2.54647  | 0.004983 | 0.004093 | Q9JJA9                   |
| MI / SHAM | 2.575774 | 0.046554 | 0.022795 | P63084                   |
| MI / SHAM | 2.668204 | 0.00011  | 0.000302 | Q00898                   |
| MI / SHAM | 2.79329  | 0.000258 | 0.000513 | Q80TT2                   |
| MI / SHAM | 2.853638 | 0.009241 | 0.006546 | Q91X58                   |
| MI / SHAM | 2.87159  | 3.11E-05 | 0.000131 | Q7M729                   |

|           |          |          |          |                 |
|-----------|----------|----------|----------|-----------------|
| MI / SHAM | 3.474303 | 0.000313 | 0.000591 | A3KGB4          |
| MI / SHAM | 3.542859 | 0.000682 | 0.001033 | Q9D4V7;Q9D4V7-2 |
| MI / SHAM | 4.127165 | 2.66E-05 | 0.00012  | P24529          |
| MI / SHAM | 5.326836 | 0.002185 | 0.002286 | Q8BG51-3        |
