# Supplementary material for: Heart failure-induced cognitive dysfunction is mediated by intracellular Ca2+ leak through ryanodine receptor type 2
Source: PubMed Central journal article supplement (PMC10400432; doi:10.1038/s41593-023-01377-6), 2023-07-10
Supplement: 41593_2023_1377_MOESM11_ESM.pdf [file 41593_2023_1377_MOESM11_ESM.pdf]

## ED\_Fig1B

| C57sham  | S2808A Sham | S2808A MI | S2808D   | S2808D+S107 |
|----------|-------------|-----------|----------|-------------|
| 0.052632 | 0.058268    | 0.042857  | 1.090909 | 0.291863    |
| 0.401786 | 0.143717    | 0.333333  | 0.588235 | 0.626499    |
| 0.476033 | 0.140196    | 0.166667  | 1.111111 | 0.327791    |
| 0.054688 | 0.433023    | 0.05      | 0.555556 | 0.238527    |
| 0        | 0.212566    | 0.333333  | 1        | 0.295398    |
| 0.44     | 0.09173     | 0.090909  | 0.538462 | 0.269117    |
| 0.3125   | 0.156227    | 0.25      | 0.909091 | 0.228489    |
| 0.057632 | 0.153949    |           | 0.666667 |             |
| 0.201786 |             |           | 0.590654 |             |
| 0.231007 |             |           | 0.386625 |             |
| 0.048688 |             |           | 0.633868 |             |
| 0.177777 |             |           | 0.715031 |             |
| 0.183662 |             |           | 0.622917 |             |
| 0.3125   |             |           |          |             |

## ED\_Fig1C

| C57sham  | S2808A Sham | S2808A MI | S2808D    | S2808D+S107 |
|----------|-------------|-----------|-----------|-------------|
| 46.59091 | 42.2895     | 46.59091  | -7.604563 | 15.60694    |
| 44.74849 | 38.1106     | 34.74849  | 19.20398  | 17          |
| 52.0197  | 59.72696    | 52.0197   | -6.91079  | 9.915014    |
| 49.43925 | 48.10997    | 49.43925  | 11.15974  | 19.48052    |
| 66       | 41.62043    | 50        | 19.88858  | 28.60636    |
| 57.77778 | 40.22333    | 27.777778 | -14.74849 | 28.01653    |
| 65.51724 | 51.978261   | 44        | 6.08365   | 19.68668    |
| 56.99077 | 42.36227    | 46.81458  | 12.96703  | 7           |
| 44.27481 |             |           | -6.85393  |             |
| 33.5689  |             |           | -7.802776 |             |
| 38.5689  |             |           | 0         |             |
| 39.8566  |             |           | 4.066161  |             |
|          |             |           | -8.01917  |             |

### ED\_Fig1D

|             | C57sham  |           |    | S2808A MI |    |   | S2808D   |          |    | S2808D+S107 |          |   | S2808A Sham |    |    |
|-------------|----------|-----------|----|-----------|----|---|----------|----------|----|-------------|----------|---|-------------|----|----|
|             | Mean     | SD        | N  | Mean      | SD | N | Mean     | SD       | N  | Mean        | SD       | N | Mean        | SD | N  |
| <b>Day1</b> | 59.15972 | 0.6046838 | 14 | 57.84762  | 2  | 7 | 57.32308 | 1.407061 | 12 | 58          | 1.875    | 8 | 56          | 3  | 10 |
| <b>Day2</b> | 42.57777 | 5.308613  | 14 | 46.99047  | 4  | 7 | 58.01026 | 3.11801  | 12 | 57          | 2.293184 | 8 | 44          | 5  | 10 |
| <b>Day3</b> | 34.40973 | 5.153997  | 14 | 36.575    | 3  | 7 | 50.72821 | 2.370323 | 12 | 49          | 5.042468 | 8 | 34          | 4  | 10 |
| <b>Day4</b> | 25.72361 | 4.116466  | 14 | 27.42857  | 3  | 7 | 45.63334 | 3.900673 | 12 | 39          | 4.249664 | 8 | 26          | 4  | 10 |

**ED\_Fig1E**

| C57sham | S2808A Sham | S2808A MI | S2808D | S2808D+S107 |
|---------|-------------|-----------|--------|-------------|
| 29.6    | 36.08       | 19.34     | 10.98  | 10.47       |
| 33.8    | 18.86       | 22.6      | 13.16  | 0           |
| 21.8    | 31.64       | 24.72     | 11.88  | 13.47       |
| 31.8    | 16.66       | 32.09     | 15.31  | 12.11       |
| 25.2    | 18.17       | 18.48     | 16.28  | 13.25       |
| 27.4    | 22.1        | 19.78     | 19.26  | 13.12       |
| 22      | 19.35       | 21.46     | 8.19   | 11.68       |
| 20.8    | 21.1        |           | 10.1   | 20.46       |
| 29.4    | 16.12       |           | 11.21  |             |
| 20.6    | 20.96       |           | 11.74  |             |
| 17.5    |             |           | 6.11   |             |
| 16.4    |             |           | 0      |             |
| 16.2    |             |           |        |             |
| 18.2    |             |           |        |             |

# ED\_Fig1F

| C57sham | S2808A Sham | S2808A MI | S2808D | S2808D+S107 |
|---------|-------------|-----------|--------|-------------|
| 5       | 5           | 5         | 2      | 2           |
| 5       | 6           | 5         | 3      | 0           |
| 5       | 3           | 4         | 3      | 4           |
| 4       | 3           | 2         | 2      | 2           |
| 4       | 4           | 6         | 3      | 3           |
| 4       | 6           | 5         | 2      | 1           |
| 3       | 6           | 5         | 1      | 1           |
| 7       | 5           |           | 2      | 2           |
| 3       |             |           | 1      |             |
| 3       |             |           | 3      |             |
| 7       |             |           | 0      |             |
| 4       |             |           | 2      |             |
| 4       |             |           |        |             |
| 3       |             |           |        |             |
