# Supplementary material for: Heart failure-induced cognitive dysfunction is mediated by intracellular Ca2+ leak through ryanodine receptor type 2
Source: PubMed Central journal article supplement (PMC10400432; doi:10.1038/s41593-023-01377-6), 2023-07-10
Supplement: 41593_2023_1377_MOESM12_ESM.pdf [file 41593_2023_1377_MOESM12_ESM.pdf]

## ED\_Fig2A

| WT       | Wt       | 44D      | 44D      |
|----------|----------|----------|----------|
| 0.01755  | 0.366941 | 0.01983  | 0.107284 |
| 0.016949 | 0.310817 | 0.06692  | 0.276958 |
| 0.015289 | 0.229992 | 0.047852 | 0.349224 |
| 0.121915 | 0.183113 | 0.026165 | 0.366017 |
| 0.080108 | 0.112622 | 0.121915 | 0.258311 |
| 0.065972 | 0.215449 | 0.080108 | 0.112622 |
| 0.188197 | 0.248439 | 0.065972 | 0.115449 |
| 0.106263 | 0.392758 | 0.188197 | 0.248439 |
| 0.052508 | 0.241046 | 0.106263 | 0.392758 |
| 0.07389  | 0.260802 | 0.052508 | 0.141046 |
|          |          | 0.07388  | 0.24608  |
|          |          | 0.129873 | 0.322849 |
|          |          | 0.035931 | 0.537148 |
|          |          | 0.109194 | 0.204255 |
|          |          | 0.033176 | 0.099035 |
|          |          | 0.06993  | 0.092366 |
|          |          | 0.106263 | 0.392758 |
|          |          | 0.052508 | 0.141046 |
|          |          | 0.007388 | 0.460802 |
|          |          | 0.129873 | 0.322849 |
|          |          | 0.035931 | 0.253715 |

## ED\_Fig2B

|          |          |
|----------|----------|
| WT       | 44D      |
| 0.166667 | 0.444444 |
| 0.3      | 0.461538 |
| 0.4      | 0.428571 |
| 0.428571 | 0.428571 |
| 0.290909 | 0.222222 |
| 0.242736 | 0.111111 |
| 0.192301 | 0.163636 |
| 0.336364 | 0.454545 |
| 0.444557 | 0.375    |
| 0.364478 | 0.266742 |
|          | 0.25     |
|          | 0.142857 |
|          | 0.333333 |
|          | 0.363636 |
|          | 0.3      |
|          | 0.3      |
|          | 0.372512 |
|          | 0.177778 |
|          | 0.260339 |
|          | 0.142853 |
|          | 0.334473 |

## ED\_Fig2C

| WT       | 44D       |
|----------|-----------|
| 60       | 13.70244  |
| 11.11111 | 43.46154  |
| 33.33333 | 25.46342  |
| 33.33333 | 12.64642  |
| 33.33333 | 40.85074  |
| 20       | 43.91304  |
| 24.48774 | 58.6262   |
| 21.73459 | 12.02046  |
| 39.01674 | 66.0105   |
| 31.64706 | 40        |
|          | 22.48804  |
|          | 21.73709  |
|          | 38.01874  |
|          | 31.64706  |
|          | 44.87297  |
|          | 21.85431  |
|          | 17.70244  |
|          | 23.46154  |
|          | 25.46342  |
|          | 12.64642  |
|          | 44.375074 |

## ED\_Fig2D

|      | Mean     | WT<br>SD | N  | Mean | <sup>44D</sup><br>SD | N  |
|------|----------|----------|----|------|----------------------|----|
| Day1 | 56.24533 | 3.644307 | 11 | 58   | 1.236667             | 22 |
| Day2 | 53.76667 | 4.397797 | 11 | 54   | 3.140493             | 22 |
| Day3 | 46.84333 | 5.576741 | 11 | 46   | 4.798626             | 22 |
| Day4 | 30.92667 | 3.964393 | 11 | 29   | 4.168919             | 22 |
| Day5 | 26.59467 | 3.065319 | 11 | 27   | 4.896637             | 22 |

## ED\_Fig2E

| WT    | 44D   |
|-------|-------|
| 19.13 | 21.79 |
| 22.12 | 17.23 |
| 21.23 | 30.5  |
| 13.57 | 20.85 |
| 13.61 | 16.91 |
| 18.54 | 19.48 |
| 20.15 | 11.53 |
| 18.91 | 13.15 |
| 16.48 | 19.45 |
| 21.53 | 16.95 |
|       | 18.8  |
|       | 14.17 |
|       | 19.36 |
|       | 22.54 |
|       | 17.02 |
|       | 21.28 |
|       | 12.15 |
|       | 19.55 |
|       | 16.94 |
|       | 19.87 |
|       | 14.17 |

**ED\_Fig2F**

| WT | 44D |
|----|-----|
| 2  | 6   |
| 2  | 2   |
| 5  | 5   |
| 4  | 3   |
| 3  | 2   |
| 4  | 2   |
| 2  | 2   |
| 3  | 2   |
| 3  | 3   |
| 4  | 4   |
|    | 3   |
|    | 4   |
|    | 2   |
|    | 4   |
|    | 2   |
|    | 5   |
|    | 2   |
|    | 3   |
|    | 4   |
|    | 3   |
|    | 4   |
