# Supplementary material for: Heart failure-induced cognitive dysfunction is mediated by intracellular Ca2+ leak through ryanodine receptor type 2
Source: PubMed Central journal article supplement (PMC10400432; doi:10.1038/s41593-023-01377-6), 2023-07-10
Supplement: 41593_2023_1377_MOESM13_ESM.pdf [file 41593_2023_1377_MOESM13_ESM.pdf]

ED\_Fig3A

RyR2: IP- KI mouse tissues

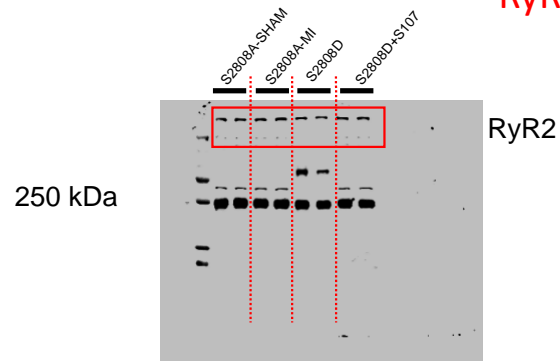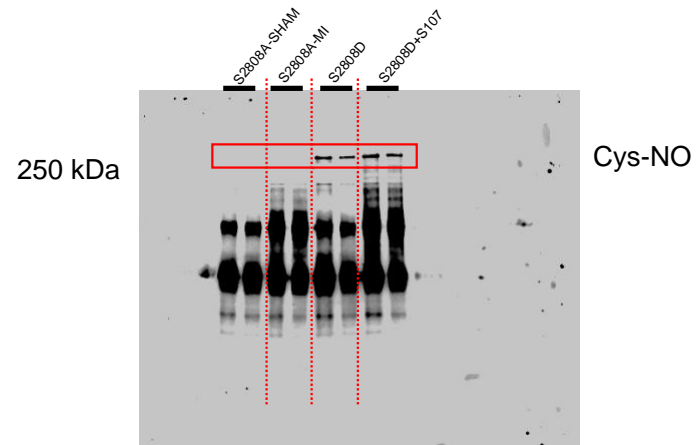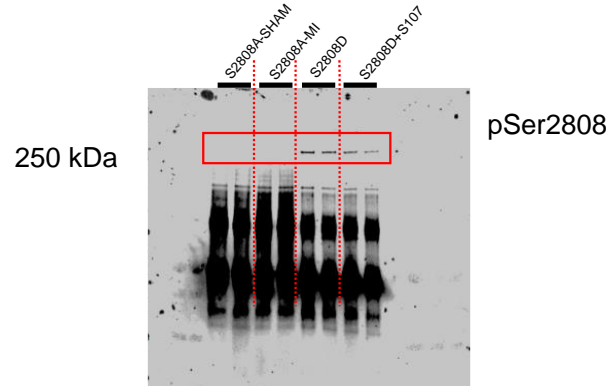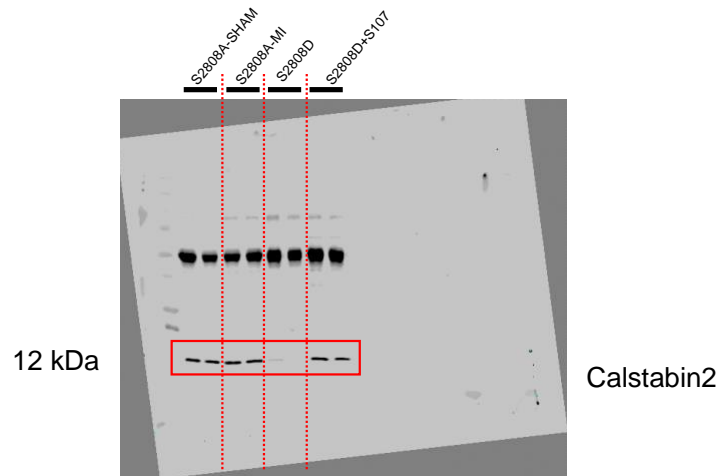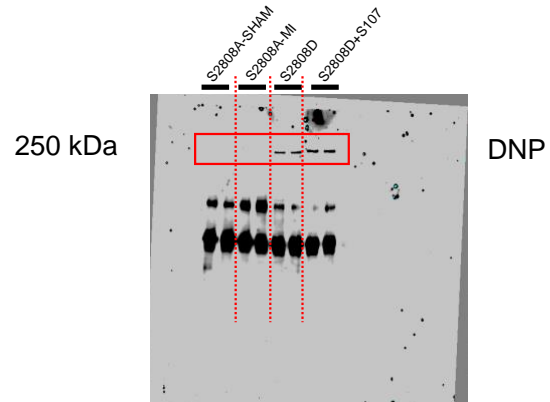

## RyR2: IP- KI mouse tissues

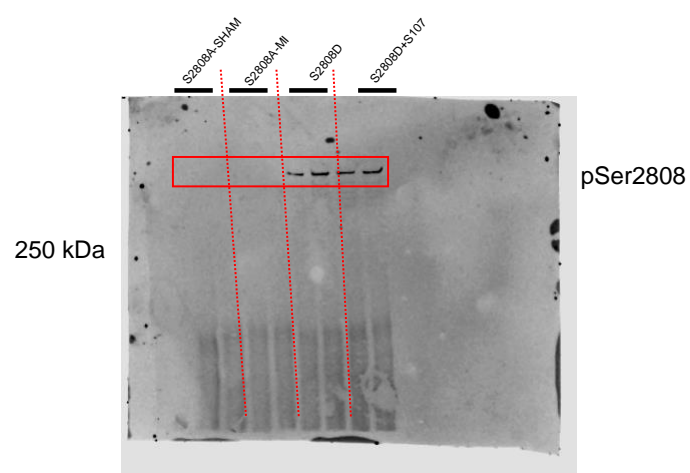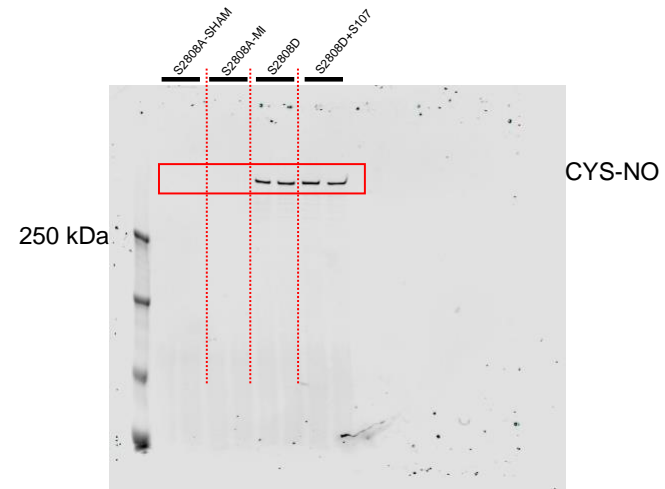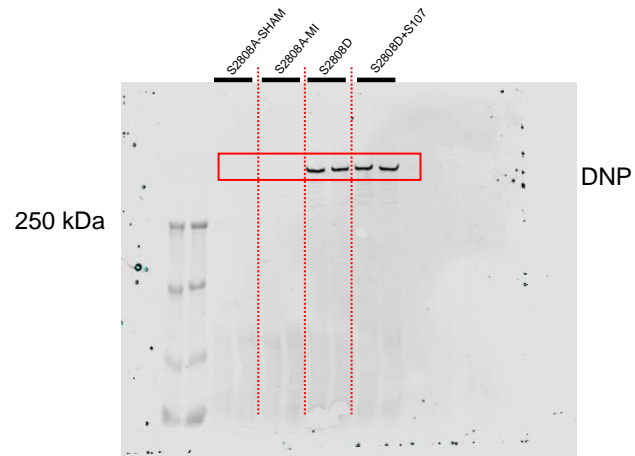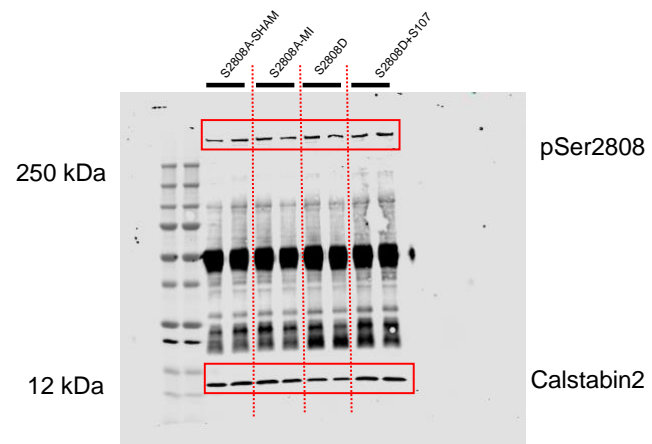

Loading Control gel showing even IgG and Total RyR2

**ED\_Fig3B-H**

**ED\_Fig3B**

|                   | Sham2808 |      |      |      | S2808MI |      |     |      | 2808D |     |     |      | 2808D+S107 |      |      |      |
|-------------------|----------|------|------|------|---------|------|-----|------|-------|-----|-----|------|------------|------|------|------|
| <b>pSer2808</b>   | 0.15     | 0.25 | 0.15 | 0.1  | 0.5     | 0.3  | 0.2 | 0.1  | 4     | 3.9 | 3.7 | 4.1  | 4          | 3.7  | 3.55 | 3.9  |
| <b>DNP</b>        | 0.25     | 0.3  | 0.2  | 0.1  | 0.1     | 0.15 | 0.9 | 0.4  | 4.5   | 3.6 | 3.7 | 4    | 3.9        | 4.12 | 4.3  | 3.6  |
| <b>Cys</b>        | 0.1      | 0.2  | 0.45 | 0.09 | 0.2     | 0.3  | 0.1 | 0.17 | 3.85  | 3.9 | 3.7 | 4.15 | 4          | 4.2  | 3.8  | 3.75 |
| <b>Calstabin2</b> | 4.2      | 3.8  | 4.3  | 3.75 | 3.9     | 4.5  | 3.7 | 4    | 0.85  | 1   | 1.3 | 0.5  | 4          | 3.9  | 3.6  | 3.75 |

**ED\_Fig3D**

| S2808Asham  | S2808AMi   | S2808D     | S2808D+S107 |
|-------------|------------|------------|-------------|
| 14.70945782 | 19.1       | 36.7923728 | 15.0171254  |
| 10.00543855 | 11.8010941 | 40.2255786 | 11.80542326 |
| 15.2        | 18.6380744 | 35.7923728 | 14.0171254  |
| 9.78        | 10.9       | 41.2255786 | 10.80542326 |

**ED\_Fig3F**

| <b>S2808A-SHAM</b> | S2808A- MI | S2808D  | S2808D+S107 |
|--------------------|------------|---------|-------------|
| 0.00458            | 0.10548    | 0.02526 | 0.0107      |
| 0.00006            | 0.00476    | 0.16495 | 0.04587     |
| 0.00047            | 0.00446    | 0.03343 | 0.01843     |

|                 |            |         |             |
|-----------------|------------|---------|-------------|
| 0.00007         | 0.02495    | 0.19296 | 0.11215     |
| 0.00045         | 0.00684    | 0.35473 | 0.02085     |
|                 | 0.00286    | 0.11215 | 0.00036     |
| <b>ED_Fig3G</b> |            |         |             |
| S2808A-SHAM     | S2808A- MI | S2808D  | S2808D+S107 |
| 3.89757         | 10.0409    | 11.8206 | 7.35996     |
| 1.5             | 4.77588    | 10.6609 | 7.27178     |
| 2.95238         | 6.96552    | 16.5676 | 3.7         |
| 3.875           | 3.40203    | 6.33537 |             |
| 3.63426         |            | 30.8811 |             |

**ED\_Fig3H**

| <b>S2808A-SHAM</b> | S2808A- MI | S2808D  | S2808D+S107 |
|--------------------|------------|---------|-------------|
| 960.593            | 832.48     | 96.655  | 390.964     |
| 568.6              | 764.261    | 137.177 | 304.556     |
| 987.42             | 234.019    | 30.1748 | 231.932     |
| 767                | 208.79     | 131.932 | 704.5       |
| 641.62             | 753.213    |         |             |
