# Supplementary material for: Heart failure-induced cognitive dysfunction is mediated by intracellular Ca2+ leak through ryanodine receptor type 2
Source: PubMed Central journal article supplement (PMC10400432; doi:10.1038/s41593-023-01377-6), 2023-07-10
Supplement: 41593_2023_1377_MOESM14_ESM.pdf [file 41593_2023_1377_MOESM14_ESM.pdf]

ED\_Fig4A

Human tissues

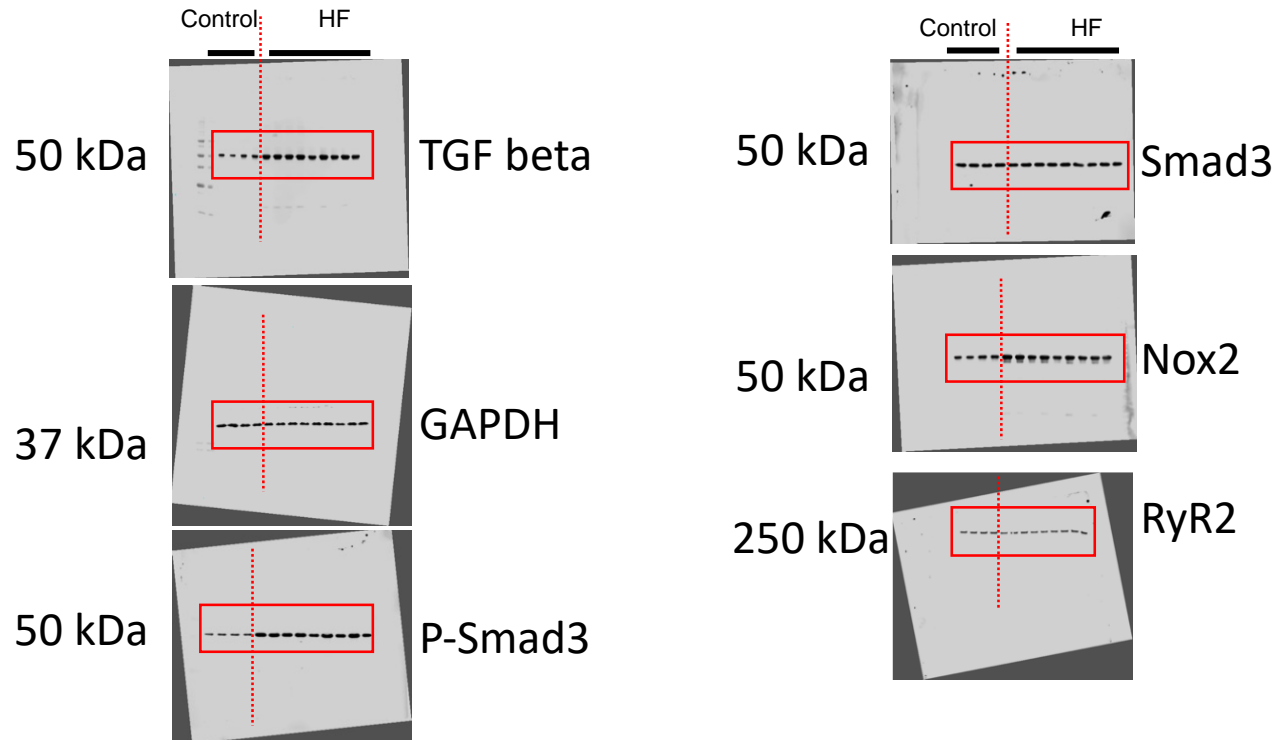



ED\_Fig4C

Figure S2D-mouse tissues

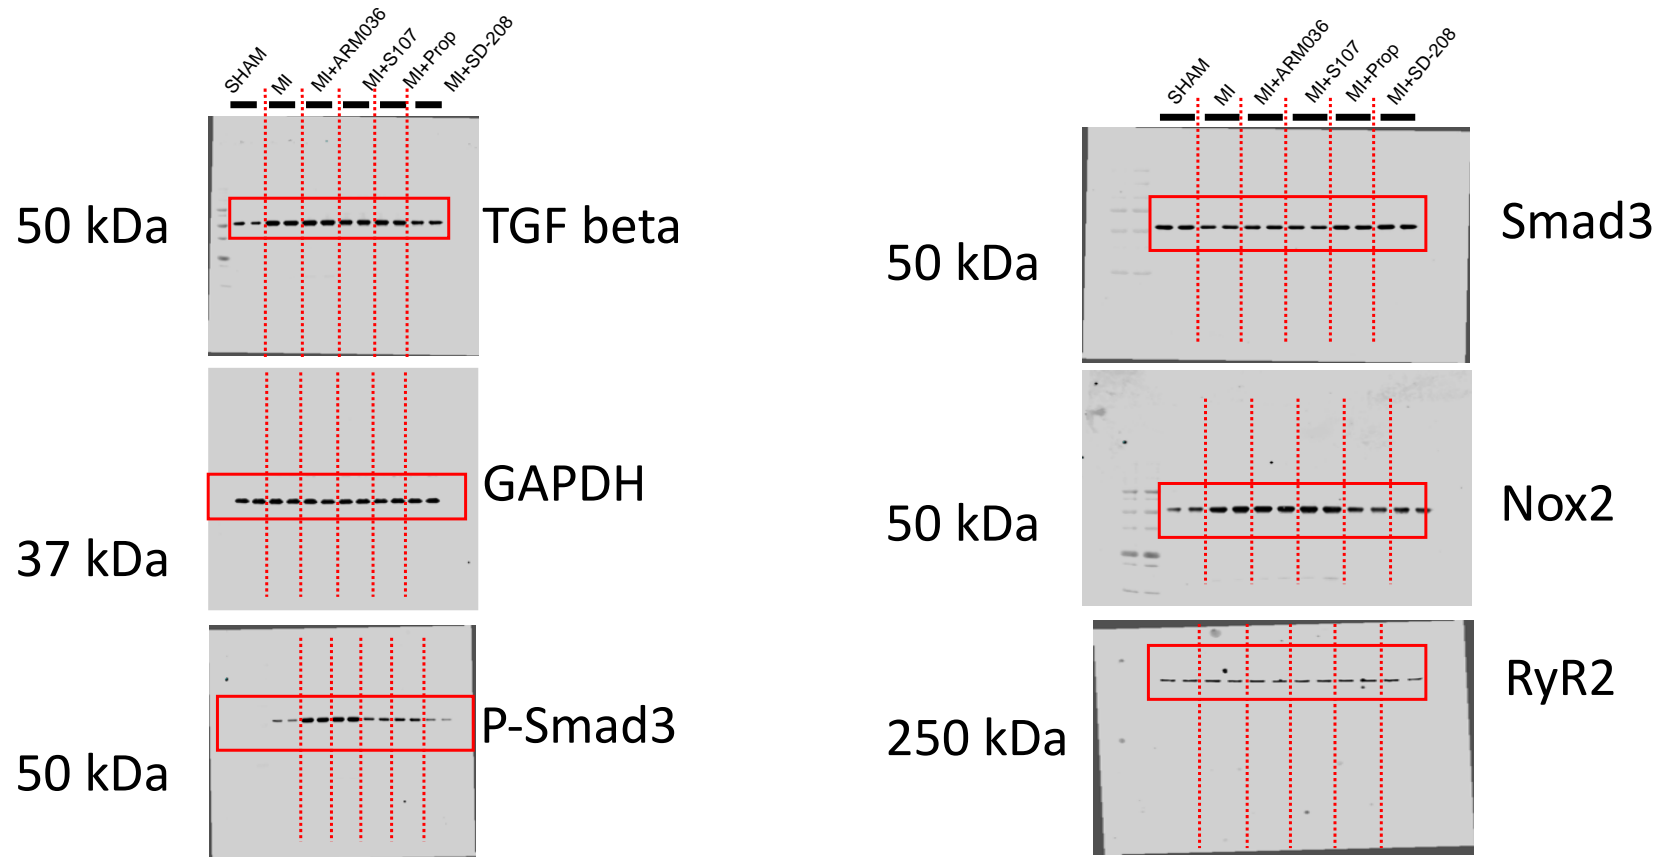

## ED\_Fig4D

|          |          | <b>Sham</b>    |      |      |     |      |  |
|----------|----------|----------------|------|------|-----|------|--|
| TGF beta | 1.227202 | 0.772798       | 1.05 | 0.95 |     |      |  |
| p/Smad   | 0.7      | 0.9            | 0.4  | 0.6  | 0.2 | 0.55 |  |
| Nox/RyR2 | 0.5      | 0.7            | 0.4  | 0.5  | 0.1 | 0.7  |  |
|          |          |                |      |      |     |      |  |
|          |          | <b>MI</b>      |      |      |     |      |  |
| TGF beta | 2.610166 | 2.744029       | 2.6  | 3    |     |      |  |
| p/Smad   | 4        | 3.8            | 3.6  | 3.9  | 4   | 3.1  |  |
| Nox/RyR2 | 3.3      | 3.7            | 3.8  | 3.9  | 4.5 | 3.5  |  |
|          |          |                |      |      |     |      |  |
|          |          | <b>MI+ARM</b>  |      |      |     |      |  |
| TGF beta | 2.531245 | 3.06409        | 2.8  | 2.3  |     |      |  |
| p/Smad   | 3.7      | 3.9            | 3.8  | 3.3  | 3.2 | 4.3  |  |
| Nox/RyR2 | 3.8      | 3.6            | 4    | 3.7  | 3.5 | 4.3  |  |
|          |          |                |      |      |     |      |  |
|          |          | <b>MI+S107</b> |      |      |     |      |  |
| TGF beta | 2.056848 | 2.054783       | 2.5  | 2.2  |     |      |  |
| p/Smad   | 1.6      | 1.8            | 2.2  | 1.8  | 1.5 | 2.7  |  |
| Nox/RyR2 | 3.5      | 3.8            | 2.5  | 2.9  | 3.5 | 2.6  |  |

|                 |          | <b>Prop</b> |     |     |
|-----------------|----------|-------------|-----|-----|
| <b>TGF beta</b> | 2.650686 | 1.889506    | 2   | 2.3 |
| <b>p/Smad</b>   | 1.9      | 2           | 2.2 | 1.8 |
| <b>Nox/RyR2</b> | 1.3      | 1.1         | 1.6 | 1.3 |

|                 |          | <b>SD</b> |     |      |
|-----------------|----------|-----------|-----|------|
| <b>TGF beta</b> | 1.329647 | 1.374367  | 1.1 | 1.45 |
| <b>p/Smad</b>   | 0.7      | 0.6       | 0.6 | 0.8  |
| <b>Nox/RyR2</b> | 1.3      | 1.2       | 1.5 | 1    |
