# Supplementary material for: Heart failure-induced cognitive dysfunction is mediated by intracellular Ca2+ leak through ryanodine receptor type 2
Source: PubMed Central journal article supplement (PMC10400432; doi:10.1038/s41593-023-01377-6), 2023-07-10
Supplement: 41593_2023_1377_MOESM15_ESM.pdf [file 41593_2023_1377_MOESM15_ESM.pdf]

## ED\_Fig10B

| SHAM     | MI       | MI+ARM036 | MI+S107  |
|----------|----------|-----------|----------|
| 0.353106 | 6.12479  | 3.267647  | 0.244688 |
| 0.26382  | 5.665606 | 3.98831   | 0.282953 |
| 0.155402 | 4.071218 | 3.67581   | 0.206422 |
| 0.353106 | 3.835249 | 4.007443  | 0.2128   |
| 0.372239 | 6.207698 | 2.559739  | 0.321218 |
| 0.161779 | 5.703871 | 3.171983  | 0.314841 |
| 0.595453 | 2.865861 | 3.765096  | 0.219177 |
| 0.346728 | 2.470453 | 4.058463  | 0.314841 |
| 0.174534 | 6.43729  | 0.952596  | 0.295708 |
|          | 7.024024 | 3.018922  |          |
|          | 4.198769 | 2.884994  |          |
|          | 3.548259 | 3.567392  |          |

## ED\_Fig10C

| SHAM     | C57MI    | C57MI+ARM036 | C57MI+S107 |
|----------|----------|--------------|------------|
| 85.69684 | 280.5929 | 297.9121     | 228.2068   |
| 75.35482 | 314.153  | 272.9176     | 226.3461   |
| 74.17008 | 426.5078 | 250.4876     | 241.2957   |
| 85.89453 | 109.736  | 128.1086     | 131.2717   |
| 80.15465 | 110.4756 | 147.525      | 112.9433   |
| 77.67594 | 105.3302 | 149.289      | 122.5153   |
| 131.4804 | 117.4735 | 103.5123     | 70.33381   |
| 98.75949 | 130.3634 | 106.2592     | 63.67185   |
| 211.1793 |          | 98.36273     | 80.47537   |
| 69.98544 |          |              |            |
| 116.8031 |          |              |            |
| 92.84542 |          |              |            |
